# Supplementary material for: A snapshot of 3649 Web-based services published between 1994 and 2017 shows a decrease in availability after 2 years
Source: Oxford University Press journal article supplement (doi:10.1093/bib/bbx159), 2017-11-02
Supplement: bbx159_supp_file1.docx [file bbx159_supp_file1.docx]

**Supplemental File 1.**

**Title:**

A snapshot of 3,649 web-based services published between 1994 and 2017 shows a decrease in availability after two years

**Authors:**

Ágnes Ősz, Lőrinc Sándor Pongor, Danuta Szirmai, Balázs Győrffy

**Description:**

Parser input file

**Usage:**

Pubmed abstract file based on searching using of following terms: “www[Title/Abstract] OR http[Title/Abstract]) AND (online tool[Title/Abstract] OR web server[Title/Abstract] OR server[Title/Abstract]”

====================================================================

1. Clin Orthop Relat Res. 2017 Apr;475(4):1252-1261. doi: 10.1007/s11999-016-5187-3.

Epub 2016 Dec 1.

Can We Estimate Short- and Intermediate-term Survival in Patients Undergoing

Surgery for Metastatic Bone Disease?

Forsberg JA(1,)(2,)(3), Wedin R(4), Boland PJ(5), Healey JH(5).

Author information:

(1)Regenerative Medicine, Naval Medical Research Center, 503 Robert Grant Avenue,

Silver Spring, MD, 20910, USA. jaforsberg@me.com. (2)Uniformed Services

University-Walter Reed Department of Surgery, Bethesda, MD, USA.

jaforsberg@me.com. (3)Section of Orthopaedics and Sports Medicine, Department of

Molecular Medicine and Surgery, Karolinska Institute, Karolinska University

Hospital, Stockholm, Sweden. jaforsberg@me.com. (4)Section of Orthopaedics and

Sports Medicine, Department of Molecular Medicine and Surgery, Karolinska

Institute, Karolinska University Hospital, Stockholm, Sweden. (5)Orthopaedic

Surgery Service, Department of Surgery, Memorial Sloan-Kettering Cancer Center

and Weill College of Medicine, Cornell University, New York, NY, USA.

BACKGROUND: Objective means of estimating survival can be used to guide surgical

decision-making and to risk-stratify patients for clinical trials. Although a

free, online tool ( www.pathfx.org ) can estimate 3- and 12-month survival,

recent work, including a survey of the Musculoskeletal Tumor Society, indicated

that estimates at 1 and 6 months after surgery also would be helpful. Longer

estimates help justify the need for more durable and expensive reconstructive

options, and very short estimates could help identify those who will not survive

1 month and should not undergo surgery. Thereby, an important use of this tool

would be to help avoid unsuccessful and expensive surgery during the last month

of life.

QUESTIONS/PURPOSES: We seek to provide a reliable, objective means of estimating

survival in patients with metastatic bone disease. After generating models to

derive 1- and 6-month survival estimates, we determined suitability for clinical

use by applying receiver operator characteristic (ROC) (area under the curve

[AUC] > 0.7) and decision curve analysis (DCA), which determines whether using

PATHFx can improve outcomes, but also discerns in which kinds of patients PATHFx

should not be used.

METHODS: We used two, existing, skeletal metastasis registries chosen for their

quality and availability. Data from Memorial Sloan-Kettering Cancer Center

(training set, n = 189) was used to develop two Bayesian Belief Networks trained

to estimate the likelihood of survival at 1 and 6 months after surgery. Next,

data from eight major referral centers across Scandinavia (n = 815) served as the

external validation set-that is, as a means to test model performance in a

different patient population. The diversity of the data between the training set

from Memorial Sloan-Kettering Cancer Center and the Scandinavian external

validation set is important to help ensure the models are applicable to patients

in various settings with differing demographics and treatment philosophies. We

considered disease-specific, laboratory, and demographic information, and the

surgeon's estimate of survival. For each model, we calculated the area under the

ROC curve (AUC) as a metric of discriminatory ability and the Net Benefit using

DCA to determine whether the models were suitable for clinical use.

RESULTS: On external validation, the AUC for the 1- and 6-month models were 0.76

(95% CI, 0.72-0.80) and 0.76 (95% CI, 0.73-0.79), respectively. The models

conferred a positive net benefit on DCA, indicating each could be used rather

than assume all patients or no patients would survive greater than 1 or 6 months,

respectively.

CONCLUSIONS: Decision analysis confirms that the 1- and 6-month Bayesian models

are suitable for clinical use.

CLINICAL RELEVANCE: These data support upgrading www.pathfx.org with the

algorithms described above, which is designed to guide surgical decision-making,

and function as a risk stratification method in support of clinical trials. This

updating has been done, so now surgeons may use any web browser to generate

survival estimates at 1, 3, 6, and 12 months after surgery, at no cost. Just as

short estimates of survival help justify palliative therapy or less-invasive

approaches to stabilization, more favorable survival estimates at 6 or 12 months

are used to justify more durable, complicated, and expensive reconstructive

options.

DOI: 10.1007/s11999-016-5187-3

PMID: 27909972

2. J Comput Biol. 2017 Mar;24(3):255-265. doi: 10.1089/cmb.2016.0074. Epub 2016 Aug

5.

NIAS-Server: Neighbors Influence of Amino acids and Secondary Structures in

Proteins.

Borguesan B(1), Inostroza-Ponta M(2), Dorn M(1).

Author information:

(1)1 Institute of Informatics, Federal University of Rio Grande do Sul , Porto

Alegre, Brazil . (2)2 Departamento de Ingeniería Informática, Center for

Biotechnology and Bioengineering , Universidad de Santiago de Chile, Santiago,

Chile .

The exponential growth in the number of experimentally determined

three-dimensional protein structures provide a new and relevant knowledge about

the conformation of amino acids in proteins. Only a few of probability densities

of amino acids are publicly available for use in structure validation and

prediction methods. NIAS (Neighbors Influence of Amino acids and Secondary

structures) is a web-based tool used to extract information about conformational

preferences of amino acid residues and secondary structures in

experimental-determined protein templates. This information is useful, for

example, to characterize folds and local motifs in proteins, molecular folding,

and can help the solution of complex problems such as protein structure

prediction, protein design, among others. The NIAS-Server and supplementary data

are available at http://sbcb.inf.ufrgs.br/nias .

DOI: 10.1089/cmb.2016.0074

PMID: 27494258

3. Gene. 2017 Feb 20;602:1-7. doi: 10.1016/j.gene.2016.11.021. Epub 2016 Nov 11.

Gly-PseAAC: Identifying protein lysine glycation through sequences.

Xu Y(1), Li L(2), Ding J(3), Wu LY(4), Mai G(5), Zhou F(6).

Author information:

(1)Department of Information and Computer Science, University of Science and

Technology Beijing, Beijing 100083, China. Electronic address: xuyan@ustb.edu.cn.

(2)Department of Information and Computer Science, University of Science and

Technology Beijing, Beijing 100083, China. Electronic address:

s20157158@ustb.edu.cn. (3)Department of Information and Computer Science,

University of Science and Technology Beijing, Beijing 100083, China. Electronic

address: artin@ustb.edu.cn. (4)Institute of Applied Mathematics, Academy of

Mathematics and Systems Science, Chinese Academy of Sciences, Beijing 100190,

China. Electronic address: wulingyun@gmail.com. (5)Center for Synthetic Biology

Engineering Research, Shenzhen Institutes of Advanced Technology, Chinese Academy

of Sciences, Shenzhen, Guangdong 518055, China. Electronic address:

gq.mai@siat.ac.cn. (6)College of Computer Science and Technology, Jilin

University, Changchun 130012, China; Key Laboratory of Symbolic Computation and

Knowledge Engineering of Ministry of Education, Jilin University, Changchun,

Jilin 130012, China.. Electronic address: ffzhou@jlu.edu.cn.

BACKGROUND: Similar to the regular enzymatic glycosylation, glycation also

attaches a sugar molecule to a peptide, but does not need the help of an enzyme.

Glycation may occur both inside and outside the host body, and will compete with

the glycosylation procedure for functional regulation of mature protein products.

The glycated residues do not show significant patterns, which make both in silico

sequence-level predictors and wet-lab validations a major challenge. This study

hypothesizes that a better feature set formulated from the glycated flanking

peptides may lead to a good glycation prediction program.

RESULTS: We explored the application of sequence order information and position

specific amino acid propensity (PSAAP) in the glycation residue prediction

problem. The PSAAP demonstrated its ability to discriminate the glycated residues

from the background control peptides. A Support Vector Machine (SVM) model was

constructed from the training dataset and achieved 68.91% in the overall

accuracy. The model also achieves 0.7258 and 0.3198 in the Area under the ROC and

Matthew's Correlation Coefficient, respectively. The user-friendly online version

of the proposed algorithm may be found on the web server Gly-PseAAC at

http://app.aporc.org/Gly-PseAAC/.

CONCLUSION: The feature set PSAAP was calculated and led to a useful

classification of glycation residues.

Copyright © 2016 Elsevier B.V. All rights reserved.

DOI: 10.1016/j.gene.2016.11.021

PMID: 27845204 [Indexed for MEDLINE]

4. J Mol Biol. 2017 Feb 3;429(3):365-371. doi: 10.1016/j.jmb.2016.12.004. Epub 2016

Dec 10.

Arpeggio: A Web Server for Calculating and Visualising Interatomic Interactions

in Protein Structures.

Jubb HC(1), Higueruelo AP(2), Ochoa-Montaño B(2), Pitt WR(3), Ascher DB(4),

Blundell TL(5).

Author information:

(1)Department of Biochemistry, Sanger Building, University of Cambridge, 80

Tennis Court Road, Cambridge CB2 1GA, UK. Electronic address: hj4@sanger.ac.uk.

(2)Department of Biochemistry, Sanger Building, University of Cambridge, 80

Tennis Court Road, Cambridge CB2 1GA, UK. (3)UCB, 208 Bath Road, Slough, West

Berkshire SL1 3WE, UK. (4)Department of Biochemistry, Sanger Building, University

of Cambridge, 80 Tennis Court Road, Cambridge CB2 1GA, UK. Electronic address:

david.ascher@unimelb.edu.au. (5)Department of Biochemistry, Sanger Building,

University of Cambridge, 80 Tennis Court Road, Cambridge CB2 1GA, UK. Electronic

address: tlb20@cam.ac.uk.

Interactions between proteins and their ligands, such as small molecules, other

proteins, and DNA, depend on specific interatomic interactions that can be

classified on the basis of atom type and distance and angle constraints.

Visualisation of these interactions provides insights into the nature of

molecular recognition events and has practical uses in guiding drug design and

understanding the structural and functional impacts of mutations. We present

Arpeggio, a web server for calculating interactions within and between proteins

and protein, DNA, or small-molecule ligands, including van der Waals', ionic,

carbonyl, metal, hydrophobic, and halogen bond contacts, and hydrogen bonds and

specific atom-aromatic ring (cation-π, donor-π, halogen-π, and carbon-π) and

aromatic ring-aromatic ring (π-π) interactions, within user-submitted

macromolecule structures. PyMOL session files can be downloaded, allowing

high-quality publication images of the interactions to be generated. Arpeggio is

implemented in Python and available as a user-friendly web interface at

http://structure.bioc.cam.ac.uk/arpeggio/ and as a downloadable package at

https://bitbucket.org/harryjubb/arpeggio.

Crown Copyright © 2016. Published by Elsevier Ltd. All rights reserved.

DOI: 10.1016/j.jmb.2016.12.004

PMCID: PMC5282402

PMID: 27964945

5. J Mol Biol. 2017 Feb 3;429(3):382-389. doi: 10.1016/j.jmb.2016.11.034. Epub 2016

Dec 10.

iFrag: A Protein-Protein Interface Prediction Server Based on Sequence Fragments.

Garcia-Garcia J(1), Valls-Comamala V(2), Guney E(3), Andreu D(4), Muñoz FJ(2),

Fernandez-Fuentes N(5), Oliva B(6).

Author information:

(1)Structural Bioinformatics Laboratory, Department of Experimental and Health

Sciences, Universitat Pompeu Fabra, C/Doctor Aiguader 88, 08003 Barcelona, Spain.

(2)Laboratory of Molecular Physiology, Department of Experimental and Health

Sciences, Universitat Pompeu Fabra, C/Doctor Aiguader 88, 08003 Barcelona, Spain.

(3)Center for Complex Network Research and Department of Physics, Northeastern

University, Boston, 02115, MA, USA; Joint IRB-BSC-CRG Program in Computational

Biology, Institute for Research in Biomedicine (IRB Barcelona), C/Baldiri Reixac

10-12, 08028 Barcelona, Spain. (4)Laboratory of Proteomics and Protein Chemistry,

Department of Experimental and Health Sciences, Universitat Pompeu Fabra,

C/Doctor Aiguader 88, 08003 Barcelona, Spain. (5)Institute of Biological,

Environmental and Rural Sciences, Aberystwyth University, Gogerddan Campus, SY23

3EB Aberystwyth, UK. (6)Structural Bioinformatics Laboratory, Department of

Experimental and Health Sciences, Universitat Pompeu Fabra, C/Doctor Aiguader 88,

08003 Barcelona, Spain. Electronic address: baldo.oliva@upf.edu.

Protein-protein interactions (PPIs) are crucial in many biological processes. The

first step towards the molecular characterisation of PPIs implies the charting of

their interfaces, that is, the surfaces mediating the interaction. To this end,

we present here iFrag, a sequence-based computational method that infers possible

interacting regions between two proteins by searching minimal common sequence

fragments of the interacting protein pairs. By utilising the sequences of two

interacting proteins (queries), iFrag derives a two-dimensional matrix computing

a score for each pair of residues that relates to the presence of similar regions

in interolog protein pairs. The scoring matrix is represented as a heat map

reflecting the potential interface regions in both query proteins. Unlike

existing approaches, iFrag does not require three-dimensional structural

information or multiple sequence alignments and can even predict small

interaction sites consisting only of few residues. Thus, predicted interfaces

range from short fragments composed of few residues to domains of proteins,

depending on available information on PPIs, as we demonstrate in several

examples. Moreover, as a proof of concept, we include the experimental validation

on the successful prediction of a peptide competing with the aggregation of

β-amyloid in Alzheimer's disease. iFrag is freely accessible at

http://sbi.imim.es/iFrag.

Copyright © 2016 Elsevier Ltd. All rights reserved.

DOI: 10.1016/j.jmb.2016.11.034

PMID: 27956148

6. J Mol Biol. 2017 Feb 3;429(3):416-425. doi: 10.1016/j.jmb.2016.10.013. Epub 2016

Oct 12.

PROFEAT Update: A Protein Features Web Server with Added Facility to Compute

Network Descriptors for Studying Omics-Derived Networks.

Zhang P(1), Tao L(2), Zeng X(1), Qin C(1), Chen SY(1), Zhu F(3), Yang SY(4), Li

ZR(5), Chen WP(6), Chen YZ(7).

Author information:

(1)Bioinformatics and Drug Design Group, Department of Pharmacy, National

University of Singapore, 117543, Singapore. (2)School of Medicine, Hangzhou

Normal University, Hangzhou 310012, P.R. China. (3)Innovative Drug Research

Centre and College of Chemistry and Chemical Engineering, Chongqing University,

Chongqing 401331, P.R. China. (4)State Key Laboratory of Biotherapy and Cancer

Center, West China Hospital, West China Medical School, Sichuan University,

Chengdu 610041, P.R. China. (5)College of Chemistry, Sichuan University, Chengdu

610064, P.R. China; Molecular Medicine Research Center, State Key Laboratory of

Biotherapy, West China Hospital, West China School of Medicine, Sichuan

University, Chengdu 610041, P.R. China. Electronic address: lizerong@scu.edu.cn.

(6)Key Lab of Agricultural Products Processing and Quality Control of Nanchang

City, Jiangxi Agricultural University, Nanchang 330045, P.R. China. Electronic

address: iaochen@163.com. (7)Bioinformatics and Drug Design Group, Department of

Pharmacy, National University of Singapore, 117543, Singapore. Electronic

address: phacyz@nus.edu.sg.

The studies of biological, disease, and pharmacological networks are facilitated

by the systems-level investigations using computational tools. In particular, the

network descriptors developed in other disciplines have found increasing

applications in the study of the protein, gene regulatory, metabolic, disease,

and drug-targeted networks. Facilities are provided by the public web servers for

computing network descriptors, but many descriptors are not covered, including

those used or useful for biological studies. We upgraded the PROFEAT web server

http://bidd2.nus.edu.sg/cgi-bin/profeat2016/main.cgi for computing up to 329

network descriptors and protein-protein interaction descriptors. PROFEAT network

descriptors comprehensively describe the topological and connectivity

characteristics of unweighted (uniform binding constants and molecular levels),

edge-weighted (varying binding constants), node-weighted (varying molecular

levels), edge-node-weighted (varying binding constants and molecular levels), and

directed (oriented processes) networks. The usefulness of the network descriptors

is illustrated by the literature-reported studies of the biological networks

derived from the genome, interactome, transcriptome, metabolome, and diseasome

profiles.

Copyright © 2016 Elsevier Ltd. All rights reserved.

DOI: 10.1016/j.jmb.2016.10.013

PMID: 27742592

7. J Mol Biol. 2017 Feb 3;429(3):390-398. doi: 10.1016/j.jmb.2016.09.005. Epub 2016

Sep 10.

TMDOCK: An Energy-Based Method for Modeling α-Helical Dimers in Membranes.

Lomize AL(1), Pogozheva ID(2).

Author information:

(1)Department of Medicinal Chemistry, College of Pharmacy, University of

Michigan, Ann Arbor, MI 48109-1065, USA. Electronic address: almz@umich.edu.

(2)Department of Medicinal Chemistry, College of Pharmacy, University of

Michigan, Ann Arbor, MI 48109-1065, USA.

TMDOCK is a novel computational method for the modeling of parallel homodimers

formed by transmembrane (TM) α-helices. Three-dimensional (3D) models of dimers

are generated by threading a target amino acid sequence through several

structural templates, followed by local energy minimization. This is the first

method that identifies helix dimerization modes and ranks them based on the

calculated free energy of α-helix association. Free energy components include van

der Waals, hydrogen bonding, and dipole interactions; side-chain conformational

entropy; and solvation energy in the anisotropic lipid environment. TMDOCK

reproduced 26 experimental dimeric structures formed by TM α-helices of 21

single-pass membrane proteins (including 4 mutants) with Cα atom rmsd from 1.0 to

3.3Å. Assessment of dimerization heterogeneity of these TM domains demonstrated

that 7 of them have a unique dimer structure, 12 have at least 2 alternative

conformations, and 2 have a large number of different association modes. All

unique experimental structures of proteins from the first group and eight

structures from the second group were reproduced in computations as top-ranked

models. A fast version of the method is available through the web server

(http://membranome.org/tm_server.php).

Copyright © 2016 Elsevier Ltd. All rights reserved.

DOI: 10.1016/j.jmb.2016.09.005

PMID: 27622289

8. Cogn Neurodyn. 2017 Feb;11(1):113-116. doi: 10.1007/s11571-016-9407-z. Epub 2016

Sep 15.

Parameterizable consensus connectomes from the Human Connectome Project: the

Budapest Reference Connectome Server v3.0.

Szalkai B(1), Kerepesi C(2), Varga B(1), Grolmusz V(3).

Author information:

(1)0000 0001 2294 6276grid.5591.8PIT Bioinformatics Group, Eötvös University,

Budapest, 1117 Hungary. (2)0000 0001 2294 6276grid.5591.8PIT Bioinformatics

Group, Eötvös University, Budapest, 1117 Hungary ; 0000 0001 2149

4407grid.5018.cInstitute for Computer Science and Control, Hungarian Academy of

Science, Budapest, 1111 Hungary. (3)0000 0001 2294 6276grid.5591.8PIT

Bioinformatics Group, Eötvös University, Budapest, 1117 Hungary ; Uratim Ltd.,

Budapest, 1118 Hungary.

Connections of the living human brain, on a macroscopic scale, can be mapped by a

diffusion MR imaging based workflow. Since the same anatomic regions can be

corresponded between distinct brains, one can compare the presence or the absence

of the edges, connecting the very same two anatomic regions, among multiple

cortices. Previously, we have constructed the consensus braingraphs on 1015

vertices first in five, then in 96 subjects in the Budapest Reference Connectome

Server v1.0 and v2.0, respectively. Here we report the construction of the

version 3.0 of the server, generating the common edges of the connectomes of

variously parameterizable subsets of the 1015-vertex connectomes of 477 subjects

of the Human Connectome Project's 500-subject release. The consensus connectomes

are downloadable in CSV and GraphML formats, and they are also visualized on the

server's page. The consensus connectomes of the server can be considered as the

"average, healthy" human connectome since all of their connections are present in

at least k subjects, where the default value of [Formula: see text], but it can

also be modified freely at the web server. The webserver is available at

http://connectome.pitgroup.org.

DOI: 10.1007/s11571-016-9407-z

PMCID: PMC5264751 [Available on 2018-02-01]

PMID: 28174617

9. J Comput Aided Mol Des. 2017 Feb;31(2):237-244. doi: 10.1007/s10822-016-9999-8.

Epub 2016 Dec 27.

Fast H-DROP: A thirty times accelerated version of H-DROP for interactive

SVM-based prediction of helical domain linkers.

Richa T(1), Ide S(1), Suzuki R(1), Ebina T(1,)(2), Kuroda Y(3).

Author information:

(1)Department of Biotechnology and Life Science, Tokyo University of Agriculture

and Technology, 12-24-16 Nakamachi, Koganei-shi, Tokyo, 184-8588, Japan.

(2)Department of Physiology, Graduate school of Medicine, The University of

Tokyo, 7-3-1 Hongo, Bunkyo-ku, Tokyo, 113-0033, Japan. (3)Department of

Biotechnology and Life Science, Tokyo University of Agriculture and Technology,

12-24-16 Nakamachi, Koganei-shi, Tokyo, 184-8588, Japan. ykuroda@cc.tuat.ac.jp.

Efficient and rapid prediction of domain regions from amino acid sequence

information alone is often required for swift structural and functional

characterization of large multi-domain proteins. Here we introduce Fast H-DROP, a

thirty times accelerated version of our previously reported H-DROP (Helical

Domain linker pRediction using OPtimal features), which is unique in specifically

predicting helical domain linkers (boundaries). Fast H-DROP, analogously to

H-DROP, uses optimum features selected from a set of 3000 ones by combining a

random forest and a stepwise feature selection protocol. We reduced the

computational time from 8.5 min per sequence in H-DROP to 14 s per sequence in

Fast H-DROP on an 8 Xeon processor Linux server by using SWISS-PROT instead of

Genbank non-redundant (nr) database for generating the PSSMs. The sensitivity and

precision of Fast H-DROP assessed by cross-validation were 33.7 and 36.2%, which

were merely ~2% lower than that of H-DROP. The reduced computational time of Fast

H-DROP, without affecting prediction performances, makes it more interactive and

user-friendly. Fast H-DROP and H-DROP are freely available from

http://domserv.lab.tuat.ac.jp/ .

DOI: 10.1007/s10822-016-9999-8

PMID: 28028736

10. Nucleic Acids Res. 2017 Jan 25;45(2):886-893. doi: 10.1093/nar/gkw749. Epub 2016

Aug 29.

Computational prediction of regulatory, premature transcription termination in

bacteria.

Millman A(1), Dar D(1), Shamir M(1), Sorek R(2).

Author information:

(1)Department of Molecular Genetics, Weizmann Institute of Science, Rehovot

76100, Israel. (2)Department of Molecular Genetics, Weizmann Institute of

Science, Rehovot 76100, Israel rotem.sorek@weizmann.ac.il.

A common strategy for regulation of gene expression in bacteria is conditional

transcription termination. This strategy is frequently employed by 5'UTR

cis-acting RNA elements (riboregulators), including riboswitches and attenuators.

Such riboregulators can assume two mutually exclusive RNA structures, one of

which forms a transcriptional terminator and results in premature termination,

and the other forms an antiterminator that allows read-through into the coding

sequence to produce a full-length mRNA. We developed a machine-learning based

approach, which, given a 5'UTR of a gene, predicts whether it can form the two

alternative structures typical to riboregulators employing conditional

termination. Using a large positive training set of riboregulators derived from

89 human microbiome bacteria, we show high specificity and sensitivity for our

classifier. We further show that our approach allows the discovery of previously

unidentified riboregulators, as exemplified by the detection of new LeuA leaders

and T-boxes in Streptococci Finally, we developed PASIFIC

(www.weizmann.ac.il/molgen/Sorek/PASIFIC/), an online web-server that, given a

user-provided 5'UTR sequence, predicts whether this sequence can adopt two

alternative structures conforming with the conditional termination paradigm. This

webserver is expected to assist in the identification of new riboswitches and

attenuators in the bacterial pan-genome.

© The Author(s) 2016. Published by Oxford University Press on behalf of Nucleic

Acids Research.

DOI: 10.1093/nar/gkw749

PMCID: PMC5314783

PMID: 27574119

11. Bioinformatics. 2017 Jan 15;33(2):266-271. doi: 10.1093/bioinformatics/btw612.

Epub 2016 Sep 25.

cMapper: gene-centric connectivity mapper for EBI-RDF platform.

Shoaib M(1,)(2), Ansari AA(1,)(2), Ahn SM(2,)(3,)(4).

Author information:

(1)Department of Biomedical Engineering, College of Medicine, University of

Ulsan, Asan Medical Center, Seoul, Republic of Korea. (2)Gachon Institute of

Genome Medicine and Sciences. (3)Division of Hematology and Oncology, Department

of Internal Medicine, Gachon University Gil Medical Center, Incheon, Republic of

Korea. (4)Department of Genome Medicine and Science, College of Medicine, Gachon

University, Seongnam, Republic of Korea.

MOTIVATION: In this era of biological big data, data integration has become a

common task and a challenge for biologists. The Resource Description Framework

(RDF) was developed to enable interoperability of heterogeneous datasets. The

EBI-RDF platform enables an efficient data integration of six independent

biological databases using RDF technologies and shared ontologies. However, to

take advantage of this platform, biologists need to be familiar with RDF

technologies and SPARQL query language. To overcome this practical limitation of

the EBI-RDF platform, we developed cMapper, a web-based tool that enables

biologists to search the EBI-RDF databases in a gene-centric manner without a

thorough knowledge of RDF and SPARQL.

RESULTS: cMapper allows biologists to search data entities in the EBI-RDF

platform that are connected to genes or small molecules of interest in multiple

biological contexts. The input to cMapper consists of a set of genes or small

molecules, and the output are data entities in six independent EBI-RDF databases

connected with the given genes or small molecules in the user's query. cMapper

provides output to users in the form of a graph in which nodes represent data

entities and the edges represent connections between data entities and inputted

set of genes or small molecules. Furthermore, users can apply filters based on

database, taxonomy, organ and pathways in order to focus on a core connectivity

graph of their interest. Data entities from multiple databases are differentiated

based on background colors. cMapper also enables users to investigate shared

connections between genes or small molecules of interest. Users can view the

output graph on a web browser or download it in either GraphML or JSON formats.

AVAILABILITY AND IMPLEMENTATION: cMapper is available as a web application with

an integrated MySQL database. The web application was developed using Java and

deployed on Tomcat server. We developed the user interface using HTML5, JQuery

and the Cytoscape Graph API. cMapper can be accessed at

http://cmapper.ewostech.net Readers can download the development manual from the

website http://cmapper.ewostech.net/docs/cMapperDocumentation.pdf. Source Code is

available at

https://github.com/muhammadshoaib/cmapperContact:smahn@gachon.ac.krSupplementary

information: Supplementary data are available at Bioinformatics online.

© The Author 2016. Published by Oxford University Press. All rights reserved. For

Permissions, please e-mail: journals.permissions@oup.com.

DOI: 10.1093/bioinformatics/btw612

PMID: 27667790

12. Bioinformatics. 2017 Jan 15;33(2):286-288. doi: 10.1093/bioinformatics/btw561.

Epub 2016 Aug 24.

Cas-analyzer: an online tool for assessing genome editing results using NGS data.

Park J(1), Lim K(2,)(3), Kim JS(2,)(3), Bae S(1,)(4).

Author information:

(1)Department of Chemistry, Hanyang University, Seoul, South Korea. (2)Center for

Genome Engineering, Institute for Basic Science, Seoul, South Korea.

(3)Department of Chemistry, Seoul National University, Seoul, South Korea and.

(4)Research Institute for Convergence of Basic Sciences, Hanyang University,

Seoul, South Korea.

Genome editing with programmable nucleases has been widely adopted in research

and medicine. Next generation sequencing (NGS) platforms are now widely used for

measuring the frequencies of mutations induced by CRISPR-Cas9 and other

programmable nucleases. Here, we present an online tool, Cas-Analyzer, a

JavaScript-based implementation for NGS data analysis. Because Cas-Analyzer is

completely used at a client-side web browser on-the-fly, there is no need to

upload very large NGS datasets to a server, a time-consuming step in genome

editing analysis. Currently, Cas-Analyzer supports various programmable

nucleases, including single nucleases and paired nucleases.AVAILABILITY AND

IMPLEMENTATION: Free access at http://www.rgenome.net/cas-analyzer/ CONTACT:

sangsubae@hanyang.ac.kr or jskim01@snu.ac.krSupplementary information:

Supplementary data are available at Bioinformatics online.

© The Author 2016. Published by Oxford University Press.

DOI: 10.1093/bioinformatics/btw561

PMCID: PMC5254075

PMID: 27559154

13. Nucleic Acids Res. 2017 Jan 9;45(1):e5. doi: 10.1093/nar/gkw819. Epub 2016 Sep

14.

Topology independent comparison of RNA 3D structures using the CLICK algorithm.

Nguyen MN(1), Sim AY(2), Wan Y(3), Madhusudhan MS(2,)(4), Verma C(2,)(5,)(6).

Author information:

(1)Bioinformatics Institute, 30 Biopolis Street, #07-01, Matrix, Singapore 138671

minhn@bii.a-star.edu.sg. (2)Bioinformatics Institute, 30 Biopolis Street, #07-01,

Matrix, Singapore 138671. (3)Genome Institute of Singapore, 60 Biopolis Street,

Genome, #02-01, Singapore 138672. (4)Indian Institute of Science Education and

Research, Pune, India. (5)Department of Biological Sciences, National University

of Singapore, Singapore. (6)School of Biological Sciences, Nanyang Technological

University, Singapore.

RNA molecules are attractive therapeutic targets because non-coding RNA molecules

have increasingly been found to play key regulatory roles in the cell. Comparing

and classifying RNA 3D structures yields unique insights into RNA evolution and

function. With the rapid increase in the number of atomic-resolution RNA

structures, it is crucial to have effective tools to classify RNA structures and

to investigate them for structural similarities at different resolutions. We

previously developed the algorithm CLICK to superimpose a pair of protein 3D

structures by clique matching and 3D least squares fitting. In this study, we

extend and optimize the CLICK algorithm to superimpose pairs of RNA 3D structures

and RNA-protein complexes, independent of the associated topologies. Benchmarking

Rclick on four different datasets showed that it is either comparable to or

better than other structural alignment methods in terms of the extent of

structural overlaps. Rclick also recognizes conformational changes between RNA

structures and produces complementary alignments to maximize the extent of

detectable similarity. Applying Rclick to study Ribonuclease III protein

correctly aligned the RNA binding sites of RNAse III with its substrate. Rclick

can be further extended to identify ligand-binding pockets in RNA. A web server

is developed at http://mspc.bii.a-star.edu.sg/minhn/rclick.html.

© The Author(s) 2016. Published by Oxford University Press on behalf of Nucleic

Acids Research.

DOI: 10.1093/nar/gkw819

PMID: 27634929

14. Nucleic Acids Res. 2017 Jan 4;45(D1):D1040-D1045. doi: 10.1093/nar/gkw982. Epub

2016 Oct 24.

PlantTFDB 4.0: toward a central hub for transcription factors and regulatory

interactions in plants.

Jin J(1), Tian F(1,)(2), Yang DC(1), Meng YQ(1), Kong L(1), Luo J(3), Gao G(4).

Author information:

(1)State Key Laboratory of Protein and Plant Gene Research, College of Life

Sciences, Center for Bioinformatics, Beijing 100871, P.R. China.

(2)Peking-Tsinghua Center for Life Sciences, Academy for Advanced

Interdisciplinary Studies, Peking University, Beijing 100871, P.R. China.

(3)State Key Laboratory of Protein and Plant Gene Research, College of Life

Sciences, Center for Bioinformatics, Beijing 100871, P.R. China

luojc@mail.cbi.pku.edu.cn. (4)State Key Laboratory of Protein and Plant Gene

Research, College of Life Sciences, Center for Bioinformatics, Beijing 100871,

P.R. China gaog@mail.cbi.pku.edu.cn.

With the goal of providing a comprehensive, high-quality resource for both plant

transcription factors (TFs) and their regulatory interactions with target genes,

we upgraded plant TF database PlantTFDB to version 4.0

(http://planttfdb.cbi.pku.edu.cn/). In the new version, we identified 320 370 TFs

from 165 species, presenting a more comprehensive genomic TF repertoires of green

plants. Besides updating the pre-existing abundant functional and evolutionary

annotation for identified TFs, we generated three new types of annotation which

provide more directly clues to investigate functional mechanisms underlying: (i)

a set of high-quality, non-redundant TF binding motifs derived from experiments;

(ii) multiple types of regulatory elements identified from high-throughput

sequencing data; (iii) regulatory interactions curated from literature and

inferred by combining TF binding motifs and regulatory elements. In addition, we

upgraded previous TF prediction server, and set up four novel tools for

regulation prediction and functional enrichment analyses. Finally, we set up a

novel companion portal PlantRegMap (http://plantregmap.cbi.pku.edu.cn) for users

to access the regulation resource and analysis tools conveniently.

© The Author(s) 2016. Published by Oxford University Press on behalf of Nucleic

Acids Research.

DOI: 10.1093/nar/gkw982

PMCID: PMC5210657

PMID: 27924042

15. Nucleic Acids Res. 2017 Jan 4;45(D1):D68-D73. doi: 10.1093/nar/gkw925. Epub 2016

Oct 18.

L1Base 2: more retrotransposition-active LINE-1s, more mammalian genomes.

Penzkofer T(1), Jäger M(2), Figlerowicz M(3), Badge R(4), Mundlos S(2), Robinson

PN(2,)(5), Zemojtel T(6,)(3).

Author information:

(1)Department of Radiology, Charité-Universitätsmedizin Berlin, Augustenburger

Platz 1, 13353 Berlin, Germany. (2)Institut für Medizinische Genetik und

Humangenetik, Charité-Universitätsmedizin Berlin, Augustenburger Platz 1, 13353

Berlin, Germany. (3)Institute of Bioorganic Chemistry, Polish Academy of

Sciences, 60-569 Poznan, Poland. (4)Department of Genetics, University of

Leicester, Leicester, LE1 7RH, UK. (5)The Jackson Laboratory for Genomic

medicine, 10 Discovery Drive, Farmington, CT 06032, USA. (6)Institut für

Medizinische Genetik und Humangenetik, Charité-Universitätsmedizin Berlin,

Augustenburger Platz 1, 13353 Berlin, Germany tomasz.zemojtel@charite.de.

LINE-1 (L1) insertions comprise as much as 17% of the human genome sequence, and

similar proportions have been recorded for other mammalian species. Given the

established role of L1 retrotransposons in shaping mammalian genomes, it becomes

an important task to track and annotate the sources of this activity: full length

elements, able to encode the cis and trans acting components of the

retrotransposition machinery. The L1Base database (http://l1base.charite.de)

contains annotated full-length sequences of LINE-1 transposons including

putatively active L1s. For the new version of L1Base, a LINE-1 annotation tool,

L1Xplorer, has been used to mine potentially active L1 retrotransposons from the

reference genome sequences of 17 mammals. The current release of the human

genome, GRCh38, contains 146 putatively active L1 elements or full length intact

L1 elements (FLIs). The newest versions of the mouse, GRCm38 and the rat,

Rnor_6.0, genomes contain 2811 and 492 FLIs, respectively. Most likely reflecting

the current level of completeness of the genome project, the latest reference

sequence of the common chimpanzee genome, PT 2.19, only contains 19 FLIs. Of

note, the current assemblies of the dog, CF 3.1 and the sheep, OA 3.1, genomes

contain 264 and 598 FLIs, respectively. Further developments in the new version

of L1Base include an updated website with implementation of modern web server

technologies. including a more responsive design for an improved user experience,

as well as the addition of data sharing capabilities for L1Xplorer annotation.

© The Author(s) 2016. Published by Oxford University Press on behalf of Nucleic

Acids Research.

DOI: 10.1093/nar/gkw925

PMCID: PMC5210629

PMID: 27924012

16. Nucleic Acids Res. 2017 Jan 4;45(D1):D658-D662. doi: 10.1093/nar/gkw983. Epub

2016 Oct 26.

Cistrome Data Browser: a data portal for ChIP-Seq and chromatin accessibility

data in human and mouse.

Mei S(1,)(2), Qin Q(1,)(2), Wu Q(1,)(2), Sun H(2), Zheng R(2), Zang C(3,)(4), Zhu

M(2), Wu J(5), Shi X(2), Taing L(3), Liu T(6), Brown M(4,)(7), Meyer CA(8,)(4),

Liu XS(9,)(2,)(3,)(4).

Author information:

(1)Clinical Translational Research Center, Shanghai Pulmonary Hospital, Tongji

University, Shanghai 200433, China. (2)Department of Bioinformatics, School of

Life Sciences and Technology, Tongji University, Shanghai 200092, China.

(3)Department of Biostatistics and Computational Biology, Dana-Farber Cancer

Institute and Harvard T.H. Chan School of Public Health, Boston, MA 02215, USA.

(4)Center for Functional Cancer Epigenetics, Dana-Farber Cancer Institute,

Boston, MA 02215, USA. (5)MOE Key Laboratory of Bioinformatics, Bioinformatics

Division and Center for Synthetic & Systems Biology, TNLIST; Department of

Automation, Tsinghua University, Beijing 100084, China. (6)Department of

Biochemistry, University at Buffalo, Buffalo, NY 14214, USA. (7)Department of

Medical Oncology, Dana-Farber Cancer Institute and Harvard Medical School,

Boston, MA 02215, USA. (8)Department of Biostatistics and Computational Biology,

Dana-Farber Cancer Institute and Harvard T.H. Chan School of Public Health,

Boston, MA 02215, USA cliff@jimmy.harvard.edu. (9)Clinical Translational Research

Center, Shanghai Pulmonary Hospital, Tongji University, Shanghai 200433, China

xsliu@jimmy.harvard.edu.

Chromatin immunoprecipitation, DNase I hypersensitivity and

transposase-accessibility assays combined with high-throughput sequencing enable

the genome-wide study of chromatin dynamics, transcription factor binding and

gene regulation. Although rapidly accumulating publicly available ChIP-seq,

DNase-seq and ATAC-seq data are a valuable resource for the systematic

investigation of gene regulation processes, a lack of standardized curation,

quality control and analysis procedures have hindered extensive reuse of these

data. To overcome this challenge, we built the Cistrome database, a collection of

ChIP-seq and chromatin accessibility data (DNase-seq and ATAC-seq) published

before January 1, 2016, including 13 366 human and 9953 mouse samples. All the

data have been carefully curated and processed with a streamlined analysis

pipeline and evaluated with comprehensive quality control metrics. We have also

created a user-friendly web server for data query, exploration and visualization.

The resulting Cistrome DB (Cistrome Data Browser), available online at

http://cistrome.org/db, is expected to become a valuable resource for

transcriptional and epigenetic regulation studies.

© The Author(s) 2016. Published by Oxford University Press on behalf of Nucleic

Acids Research.

DOI: 10.1093/nar/gkw983

PMCID: PMC5210658

PMID: 27789702

17. Nucleic Acids Res. 2017 Jan 4;45(D1):1015-1020. doi: 10.1093/nar/gkw935. Epub

2016 Oct 13.

PIECE 2.0: an update for the plant gene structure comparison and evolution

database.

Wang Y(1,)(2,)(3), Xu L(2,)(3), Thilmony R(1), You FM(4), Gu YQ(5), Coleman-Derr

D(6,)(3).

Author information:

(1)USDA-ARS, Western Regional Research Center, Crop Improvement and Genetics

Research Unit, Albany, CA 94710, USA. (2)Department of Plant and Microbial

Biology, University of California Berkeley, Berkeley, CA, USA. (3)USDA-ARS, Plant

Gene Expression Center, Albany, CA 94710, USA. (4)Cereal Research Centre,

Agriculture and Agri-Food Canada, Morden R6M 1Y5 MB, Canada. (5)USDA-ARS, Western

Regional Research Center, Crop Improvement and Genetics Research Unit, Albany, CA

94710, USA yong.gu@ars.usda.gov. (6)Department of Plant and Microbial Biology,

University of California Berkeley, Berkeley, CA, USA

devin.coleman-derr@ars.usda.gov.

PIECE (Plant Intron Exon Comparison and Evolution) is a web-accessible database

that houses intron and exon information of plant genes. PIECE serves as a

resource for biologists interested in comparing intron-exon organization and

provides valuable insights into the evolution of gene structure in plant genomes.

Recently, we updated PIECE to a new version, PIECE 2.0

(http://probes.pw.usda.gov/piece or http://aegilops.wheat.ucdavis.edu/piece).

PIECE 2.0 contains annotated genes from 49 sequenced plant species as compared to

25 species in the previous version. In the current version, we also added several

new features: (i) a new viewer was developed to show phylogenetic trees displayed

along with the structure of individual genes; (ii) genes in the phylogenetic tree

can now be also grouped according to KOG (The annotation of Eukaryotic

Orthologous Groups) and KO (KEGG Orthology) in addition to Pfam domains; (iii)

information on intronless genes are now included in the database; (iv) a

statistical summary of global gene structure information for each species and its

comparison with other species was added; and (v) an improved GSDraw tool was

implemented in the web server to enhance the analysis and display of gene

structure. The updated PIECE 2.0 database will be a valuable resource for the

plant research community for the study of gene structure and evolution.

© Crown copyright 2016.

DOI: 10.1093/nar/gkw935

PMCID: PMC5210635

PMID: 27742820

18. Nucleic Acids Res. 2017 Jan 4;45(D1):D347-D352. doi: 10.1093/nar/gkw918. Epub

2016 Oct 12.

Ontobee: A linked ontology data server to support ontology term dereferencing,

linkage, query and integration.

Ong E(1), Xiang Z(1), Zhao B(1), Liu Y(1), Lin Y(1), Zheng J(2), Mungall C(3),

Courtot M(4), Ruttenberg A(5), He Y(6).

Author information:

(1)University of Michigan Medical School, Ann Arbor, MI 48109, USA. (2)University

of Pennsylvania Perelman School of Medicine, Philadelphia, PA 19104, USA.

(3)Lawrence Berkeley National Laboratory, Berkeley, CA 94720, USA. (4)European

Molecular Biology Laboratory-European Bioinformatics Institute, Hinxton,

Cambridge, CB10 1SD, UK. (5)University at Buffalo, Buffalo, NY 14203, USA.

(6)University of Michigan Medical School, Ann Arbor, MI 48109, USA

yongqunh@umich.edu.

Linked Data (LD) aims to achieve interconnected data by representing entities

using Unified Resource Identifiers (URIs), and sharing information using Resource

Description Frameworks (RDFs) and HTTP. Ontologies, which logically represent

entities and relations in specific domains, are the basis of LD. Ontobee

(http://www.ontobee.org/) is a linked ontology data server that stores ontology

information using RDF triple store technology and supports query, visualization

and linkage of ontology terms. Ontobee is also the default linked data server for

publishing and browsing biomedical ontologies in the Open Biological Ontology

(OBO) Foundry (http://obofoundry.org) library. Ontobee currently hosts more than

180 ontologies (including 131 OBO Foundry Library ontologies) with over four

million terms. Ontobee provides a user-friendly web interface for querying and

visualizing the details and hierarchy of a specific ontology term. Using the

eXtensible Stylesheet Language Transformation (XSLT) technology, Ontobee is able

to dereference a single ontology term URI, and then output RDF/eXtensible Markup

Language (XML) for computer processing or display the HTML information on a web

browser for human users. Statistics and detailed information are generated and

displayed for each ontology listed in Ontobee. In addition, a SPARQL web

interface is provided for custom advanced SPARQL queries of one or multiple

ontologies.

© The Author(s) 2016. Published by Oxford University Press on behalf of Nucleic

Acids Research.

DOI: 10.1093/nar/gkw918

PMCID: PMC5210626

PMID: 27733503

19. Nucleic Acids Res. 2017 Jan 4;45(D1):D1082-D1089. doi: 10.1093/nar/gkw704. Epub

2016 Aug 4.

SoyNet: a database of co-functional networks for soybean Glycine max.

Kim E(1), Hwang S(1), Lee I(2).

Author information:

(1)Department of Biotechnology, College of Life Science and Biotechnology, Yonsei

University, Seoul, Korea. (2)Department of Biotechnology, College of Life Science

and Biotechnology, Yonsei University, Seoul, Korea insuklee@yonsei.ac.kr.

Soybean (Glycine max) is a legume crop with substantial economic value, providing

a source of oil and protein for humans and livestock. More than 50% of edible

oils consumed globally are derived from this crop. Soybean plants are also

important for soil fertility, as they fix atmospheric nitrogen by symbiosis with

microorganisms. The latest soybean genome annotation (version 2.0) lists 56 044

coding genes, yet their functional contributions to crop traits remain mostly

unknown. Co-functional networks have proven useful for identifying genes that are

involved in a particular pathway or phenotype with various network algorithms.

Here, we present SoyNet (available at www.inetbio.org/soynet), a database of

co-functional networks for G. max and a companion web server for network-based

functional predictions. SoyNet maps 1 940 284 co-functional links between 40 812

soybean genes (72.8% of the coding genome), which were inferred from 21 distinct

types of genomics data including 734 microarrays and 290 RNA-seq samples from

soybean. SoyNet provides a new route to functional investigation of the soybean

genome, elucidating genes and pathways of agricultural importance.

© The Author(s) 2016. Published by Oxford University Press on behalf of Nucleic

Acids Research.

DOI: 10.1093/nar/gkw704

PMCID: PMC5210602

PMID: 27492285

20. Bioinformatics. 2017 Jan 1;33(1):148-149. doi: 10.1093/bioinformatics/btw579.

Epub 2016 Sep 6.

OntoBrowser: a collaborative tool for curation of ontologies by subject matter

experts.

Ravagli C(1), Pognan F(1), Marc P(1).

Author information:

(1)PreClinical Safety, Translational Sciences, Novartis Institute for Biomedical

Research, Basel, CH-4002, Switzerland.

The lack of controlled terminology and ontology usage leads to incomplete search

results and poor interoperability between databases. One of the major underlying

challenges of data integration is curating data to adhere to controlled

terminologies and/or ontologies. Finding subject matter experts with the time and

skills required to perform data curation is often problematic. In addition,

existing tools are not designed for continuous data integration and collaborative

curation. This results in time-consuming curation workflows that often become

unsustainable. The primary objective of OntoBrowser is to provide an easy-to-use

online collaborative solution for subject matter experts to map reported terms to

preferred ontology (or code list) terms and facilitate ontology evolution.

Additional features include web service access to data, visualization of

ontologies in hierarchical/graph format and a peer review/approval workflow with

alerting.AVAILABILITY AND IMPLEMENTATION: The source code is freely available

under the Apache v2.0 license. Source code and installation instructions are

available at http://opensource.nibr.com This software is designed to run on a

Java EE application server and store data in a relational database.

CONTACT: philippe.marc@novartis.com.

© The Author 2016. Published by Oxford University Press.

DOI: 10.1093/bioinformatics/btw579

PMID: 27605099

21. Bioinformatics. 2017 Jan 1;33(1):122-124. doi: 10.1093/bioinformatics/btw564.

Epub 2016 Aug 26.

PseKRAAC: a flexible web server for generating pseudo K-tuple reduced amino acids

composition.

Zuo Y(1), Li Y(1,)(2), Chen Y(3), Li G(1), Yan Z(1,)(3), Yang L(4).

Author information:

(1)The Key Laboratory of Mammalian Reproductive Biology and Biotechnology of the

Ministry of Education, College of Life Sciences, Inner Mongolia University,

Hohhot 010021, China. (2)Department of Mechanical Engineering, Columbia

University, New York, NY 10027, USA. (3)School of Physical Science and

Technology, Inner Mongolia University, Hohhot 010021, China. (4)College of

Bioinformatics Science and Technology, Harbin Medical University, Harbin 150081,

China.

The reduced amino acids perform powerful ability for both simplifying protein

complexity and identifying functional conserved regions. However, dealing with

different protein problems may need different kinds of cluster methods.

Encouraged by the success of pseudo-amino acid composition algorithm, we

developed a freely available web server, called PseKRAAC (the pseudo K-tuple

reduced amino acids composition). By implementing reduced amino acid alphabets,

the protein complexity can be significantly simplified, which leads to decrease

chance of overfitting, lower computational handicap and reduce information

redundancy. PseKRAAC delivers more capability for protein research by

incorporating three crucial parameters that describes protein composition. Users

can easily generate many different modes of PseKRAAC tailored to their needs by

selecting various reduced amino acids alphabets and other characteristic

parameters. It is anticipated that the PseKRAAC web server will become a very

useful tool in computational proteomics and protein sequence

analysis.AVAILABILITY AND IMPLEMENTATION: Freely available on the web at

http://bigdata.imu.edu.cn/psekraac CONTACTS: yczuo@imu.edu.cn or

imu.hema@foxmail.com or yanglei_hmu@163.comSupplementary information:

Supplementary data are available at Bioinformatics online.

© The Author 2016. Published by Oxford University Press. All rights reserved. For

Permissions, please e-mail: journals.permissions@oup.com.

DOI: 10.1093/bioinformatics/btw564

PMID: 27565583

22. Bioinformatics. 2017 Jan 1;33(1):35-41. doi: 10.1093/bioinformatics/btw539. Epub

2016 Aug 16.

iRSpot-EL: identify recombination spots with an ensemble learning approach.

Liu B(1,)(2,)(3), Wang S(1), Long R(1), Chou KC(3,)(4).

Author information:

(1)School of Computer Science and Technology. (2)Key Laboratory of Network

Oriented Intelligent Computation, Harbin Institute of Technology Shenzhen

Graduate School, Shenzhen, Guangdong 518055, China. (3)Gordon Life Science

Institute, Belmont, MA 02478, USA. (4)Center of Excellence in Genomic Medicine

Research (CEGMR), King Abdulaziz University, Jeddah 21589, Saudi Arabia.

MOTIVATION: Coexisting in a DNA system, meiosis and recombination are two

indispensible aspects for cell reproduction and growth. With the avalanche of

genome sequences emerging in the post-genomic age, it is an urgent challenge to

acquire the information of DNA recombination spots because it can timely provide

very useful insights into the mechanism of meiotic recombination and the process

of genome evolution.

RESULTS: To address such a challenge, we have developed a predictor, called

IRSPOT-EL: , by fusing different modes of pseudo K-tuple nucleotide composition

and mode of dinucleotide-based auto-cross covariance into an ensemble classifier

of clustering approach. Five-fold cross tests on a widely used benchmark dataset

have indicated that the new predictor remarkably outperforms its existing

counterparts. Particularly, far beyond their reach, the new predictor can be

easily used to conduct the genome-wide analysis and the results obtained are

quite consistent with the experimental map.

AVAILABILITY AND IMPLEMENTATION: For the convenience of most experimental

scientists, a user-friendly web-server for iRSpot-EL has been established at

http://bioinformatics.hitsz.edu.cn/iRSpot-EL/, by which users can easily obtain

their desired results without the need to go through the complicated mathematical

equations involved.

CONTACT: bliu@gordonlifescience.org or bliu@insun.hit.edu.cnSupplementary

information: Supplementary data are available at Bioinformatics online.

© The Author 2016. Published by Oxford University Press. All rights reserved. For

Permissions, please e-mail: journals.permissions@oup.com.

DOI: 10.1093/bioinformatics/btw539

PMID: 27531102

23. Chem Biol Drug Des. 2017 Jan;89(1):74-83. doi: 10.1111/cbdd.12834. Epub 2016 Sep

9.

AVCpred: an integrated web server for prediction and design of antiviral

compounds.

Qureshi A(1), Kaur G(1), Kumar M(1).

Author information:

(1)Bioinformatics Centre, Institute of Microbial Technology, Council of

Scientific and Industrial Research, Chandigarh, India.

Viral infections constantly jeopardize the global public health due to lack of

effective antiviral therapeutics. Therefore, there is an imperative need to speed

up the drug discovery process to identify novel and efficient drug candidates. In

this study, we have developed quantitative structure-activity relationship

(QSAR)-based models for predicting antiviral compounds (AVCs) against deadly

viruses like human immunodeficiency virus (HIV), hepatitis C virus (HCV),

hepatitis B virus (HBV), human herpesvirus (HHV) and 26 others using publicly

available experimental data from the ChEMBL bioactivity database. Support vector

machine (SVM) models achieved a maximum Pearson correlation coefficient of 0.72,

0.74, 0.66, 0.68, and 0.71 in regression mode and a maximum Matthew's correlation

coefficient 0.91, 0.93, 0.70, 0.89, and 0.71, respectively, in classification

mode during 10-fold cross-validation. Furthermore, similar performance was

observed on the independent validation sets. We have integrated these models in

the AVCpred web server, freely available at http://crdd.osdd.net/servers/avcpred.

In addition, the datasets are provided in a searchable format. We hope this web

server will assist researchers in the identification of potential antiviral

agents. It would also save time and cost by prioritizing new drugs against

viruses before their synthesis and experimental testing.

© 2016 John Wiley & Sons A/S.

DOI: 10.1111/cbdd.12834

PMID: 27490990

24. Hum Mutat. 2017 Jan;38(1):25-33. doi: 10.1002/humu.23125. Epub 2016 Oct 13.

mirVAFC: A Web Server for Prioritizations of Pathogenic Sequence Variants from

Exome Sequencing Data via Classifications.

Li Z(1), Liu Z(1), Jiang Y(1), Chen D(1), Ran X(1), Sun ZS(1,)(2), Wu J(1).

Author information:

(1)Institute of Genomic Medicine, Wenzhou Medical University, Wenzhou, China.

(2)Beijing Institute of Life Science, Chinese Academy of Sciences, Beijing,

China.

Exome sequencing has been widely used to identify the genetic variants underlying

human genetic disorders for clinical diagnoses, but the identification of

pathogenic sequence variants among the huge amounts of benign ones is complicated

and challenging. Here, we describe a new Web server named mirVAFC for pathogenic

sequence variants prioritizations from clinical exome sequencing (CES) variant

data of single individual or family. The mirVAFC is able to comprehensively

annotate sequence variants, filter out most irrelevant variants using custom

criteria, classify variants into different categories as for estimated

pathogenicity, and lastly provide pathogenic variants prioritizations based on

classifications and mutation effects. Case studies using different types of

datasets for different diseases from publication and our in-house data have

revealed that mirVAFC can efficiently identify the right pathogenic candidates as

in original work in each case. Overall, the Web server mirVAFC is specifically

developed for pathogenic sequence variant identifications from family-based CES

variants using classification-based prioritizations. The mirVAFC Web server is

freely accessible at https://www.wzgenomics.cn/mirVAFC/.

© 2016 WILEY PERIODICALS, INC.

DOI: 10.1002/humu.23125

PMID: 27676360

25. Infect Genet Evol. 2017 Jan;47:132-139. doi: 10.1016/j.meegid.2016.10.008. Epub

2016 Oct 17.

The wing venation patterns to identify single tsetse flies.

Kaba D(1), Berté D(1), Ta BT(1), Tellería J(2), Solano P(2), Dujardin JP(2).

Author information:

(1)INSP/IPR Bouaké, Côte d'Ivoire. (2)UMR 177, INTERTRYP, CIRAD-IRD, Baillarguet,

France.

This is the first study to explore the potential of various geometric

morphometrics methods to help the morphological diagnostic of tsetse species,

vectors of human and animal trypanosomiases in sub-Saharan Africa. We compared

landmarks, semilandmarks and outlines techniques on male and female samples of

species, and suggested adapted strategies according to the countries and their

own Glossina fauna. We could compare up to 7 taxa belonging to the three main

subgenera of the Glossina genus: Nemorhina (5 species), Glossina (1 species) and

Austenina (1 species). Our sample included the major vectors of sleeping

sickness: G. palpalis palpalis, G. p. gambiensis, G. fuscipes fuscipes and G. f.

quanzensis, as well as two important vectors of African animal trypanosomoses: G.

tachinoides and Glossina morsitans submorsitans. The average level of correct

species recognition by the wing shape was satisfactory, and slightly higher for

females than for males. The best scores of correct assignment, in both sexes,

were obtained by the contour technique (96% of correct attribution in females,

92% in males), slightly higher than for semilandmarks (95% and 91%) or landmarks

(94% and 89%) techniques. We made our images of wings freely available to be used

as reference images (http://mome-clic.com), and we describe the conditions and

the analytical steps to be followed to identify unknown specimens using external

reference images. Under adequate conditions, such use of reference images

obtained from a free access server could help species identification of new

samples anywhere in Africa.

Copyright © 2016 Elsevier B.V. All rights reserved.

DOI: 10.1016/j.meegid.2016.10.008

PMID: 27765637

26. Proteins. 2017 Jan;85(1):72-77. doi: 10.1002/prot.25199. Epub 2016 Nov 13.

Aquerium: A web application for comparative exploration of domain-based protein

occurrences on the taxonomically clustered genome tree.

Adebali O(1,)(2,)(3), Zhulin IB(1,)(2,)(3).

Author information:

(1)UT-ORNL Graduate School of Genome Science and Technology, University of

Tennessee, Knoxville, Tennessee, 37996. (2)Department of Microbiology, University

of Tennessee, Knoxville, Tennessee, 37996. (3)Computer Science and Mathematics

Division, Oak Ridge National Laboratory, Oak Ridge, Tennessee, 37961.

Gene duplication and loss are major driving forces in evolution. While many

important genomic resources provide information on gene presence, there is a lack

of tools giving equal importance to presence and absence information as well as

web platforms enabling easy visual comparison of multiple domain-based protein

occurrences at once. Here, we present Aquerium, a platform for visualizing

genomic presence and absence of biomolecules with a focus on protein domain

architectures. The web server offers advanced domain organization querying

against the database of pre-computed domains for ∼26,000 organisms and it can be

utilized for identification of evolutionary events, such as fusion,

disassociation, duplication, and shuffling of protein domains. The tool also

allows alternative inputs of custom entries or BLASTP results for visualization.

Aquerium will be a useful tool for biologists who perform comparative genomic and

evolutionary analyses. The web server is freely accessible at

http://aquerium.utk.edu. Proteins 2016; 85:72-77. © 2016 Wiley Periodicals, Inc.

© 2016 Wiley Periodicals, Inc.

DOI: 10.1002/prot.25199

PMCID: PMC5167639 [Available on 2018-01-01]

PMID: 27802571

27. RNA. 2017 Jan;23(1):14-22. Epub 2016 Nov 2.

Genome-scale characterization of RNA tertiary structures and their functional

impact by RNA solvent accessibility prediction.

Yang Y(1), Li X(1,)(2), Zhao H(3), Zhan J(1), Wang J(4), Zhou Y(1,)(4).

Author information:

(1)Institute for Glycomics and School of Information and Communication

Technology, Griffith University, Gold Coast, QLD 4222, Australia. (2)School of

Computer Science and Information Engineering, Hefei University of Technology,

Hefei 230009, China. (3)Institute of Health and Biomedical Innovation, Queensland

University of Technology, Queensland 4222, Australia. (4)Shandong Provincial Key

Laboratory of Biophysics, Institute of Biophysics, Dezhou University, Dezhou

253023, China.

As most RNA structures are elusive to structure determination, obtaining solvent

accessible surface areas (ASAs) of nucleotides in an RNA structure is an

important first step to characterize potential functional sites and core

structural regions. Here, we developed RNAsnap, the first machine-learning method

trained on protein-bound RNA structures for solvent accessibility prediction.

Built on sequence profiles from multiple sequence alignment (RNAsnap-prof), the

method provided robust prediction in fivefold cross-validation and an independent

test (Pearson correlation coefficients, r, between predicted and actual ASA

values are 0.66 and 0.63, respectively). Application of the method to 6178 mRNAs

revealed its positive correlation to mRNA accessibility by dimethyl sulphate

(DMS) experimentally measured in vivo (r = 0.37) but not in vitro (r = 0.07),

despite the lack of training on mRNAs and the fact that DMS accessibility is only

an approximation to solvent accessibility. We further found strong association

across coding and noncoding regions between predicted solvent accessibility of

the mutation site of a single nucleotide variant (SNV) and the frequency of that

variant in the population for 2.2 million SNVs obtained in the 1000 Genomes

Project. Moreover, mapping solvent accessibility of RNAs to the human genome

indicated that introns, 5' cap of 5' and 3' cap of 3' untranslated regions, are

more solvent accessible, consistent with their respective functional roles. These

results support conformational selections as the mechanism for the formation of

RNA-protein complexes and highlight the utility of genome-scale characterization

of RNA tertiary structures by RNAsnap. The server and its stand-alone

downloadable version are available at http://sparks-lab.org.

© 2016 Yang et al.; Published by Cold Spring Harbor Laboratory Press for the RNA

Society.

DOI: 10.1261/rna.057364.116

PMCID: PMC5159645

PMID: 27807179

28. Bioinformatics. 2016 Dec 28. pii: btw694. doi: 10.1093/bioinformatics/btw694.

[Epub ahead of print]

QAcon: single model quality assessment using protein structural and contact

information with machine learning techniques.

Cao R(1), Adhikari B(2), Bhattacharya D(3), Sun M(4), Hou J(2), Cheng J(2,)(5).

Author information:

(1)Department of Computer Science, Pacific Lutheran University, WA 98447, USA.

(2)Department of Computer Science, University of Missouri, Columbia, MO 65211,

USA. (3)Department of Electrical Engineering and Computer Science, Wichita State

University, Wichita, KS 67260-0083, USA. (4)Department of Electrical and Computer

Engineering. (5)Informatics Institute, University of Missouri, Columbia, MO

65211, USA.

MOTIVATION: Protein model quality assessment (QA) plays a very important role in

protein structure prediction. It can be divided into two groups of methods:

single model and consensus QA method. The consensus QA methods may fail when

there is a large portion of low quality models in the model pool.

RESULTS: In this paper, we develop a novel single-model quality assessment method

QAcon utilizing structural features, physicochemical properties, and residue

contact predictions. We apply residue-residue contact information predicted by

two protein contact prediction methods PSICOV and DNcon to generate a new score

as feature for quality assessment. This novel feature and other 11 features are

used as input to train a two-layer neural network on CASP9 datasets to predict

the quality of a single protein model. We blindly benchmarked our method QAcon on

CASP11 dataset as the MULTICOM-CLUSTER server. Based on the evaluation, our

method is ranked as one of the top single model QA methods. The good performance

of the features based on contact prediction illustrates the value of using

contact information in protein quality assessment.

AVAILABILITY AND IMPLEMENTATION: The web server and the source code of QAcon are

freely available at: http://cactus.rnet.missouri.edu/QAcon CONTACT:

chengji@missouri.eduSupplementary information: Supplementary data are available

at Bioinformatics online.

© The Author 2016. Published by Oxford University Press. All rights reserved. For

Permissions, please e-mail: journals.permissions@oup.com.

DOI: 10.1093/bioinformatics/btw694

PMID: 28035027

29. Bioinformatics. 2016 Dec 28. pii: btw790. doi: 10.1093/bioinformatics/btw790.

[Epub ahead of print]

dAPE: a web server to detect homorepeats and follow their evolution.

Mier P(1), Andrade-Navarro MA(1).

Author information:

(1)Faculty of Biology, Johannes Gutenberg Universität, Institute of Molecular

Biology, Mainz 55128, Germany.

Homorepeats are low complexity regions consisting of repetitions of a single

amino acid residue. There is no current consensus on the minimum number of

residues needed to define a functional homorepeat, nor even if mismatches are

allowed. Here we present dAPE, a web server that helps following the evolution of

homorepeats based on orthology information, using a sensitive but tunable cutoff

to help in the identification of emerging homorepeats.AVAILABILITY AND

IMPLEMENTATION: dAPE can be accessed from

http://cbdm-01.zdv.uni-mainz.de/∼munoz/polyx CONTACT:

munoz@uni-mainz.deSupplementary information: Supplementary data are available at

Bioinformatics online.

© The Author 2016. Published by Oxford University Press.

DOI: 10.1093/bioinformatics/btw790

PMID: 28031183

30. J Chem Inf Model. 2016 Dec 27;56(12):2287-2291. doi: 10.1021/acs.jcim.6b00407.

Epub 2016 Dec 15.

MIB: Metal Ion-Binding Site Prediction and Docking Server.

Lin YF(1), Cheng CW(1), Shih CS(1), Hwang JK(1), Yu CS, Lu CH(2).

Author information:

(1)Institute of Bioinformatics and Systems Biology, National Chiao Tung

University , Hsinchu, 30050 Taiwan. (2)Graduate Institute of Basic Medical

Science, China Medical University , Taichung 40402, Taiwan.

The structure of a protein determines its biological function(s) and its

interactions with other factors; the binding regions tend to be conserved in

sequence and structure, and the interacting residues involved are usually in

close 3D space. The Protein Data Bank currently contains more than 110 000

protein structures, approximately one-third of which contain metal ions.

Identifying and characterizing metal ion-binding sites is thus essential for

investigating a protein's function(s) and interactions. However, experimental

approaches are time-consuming and costly. The web server reported here was built

to predict metal ion-binding residues and to generate the predicted metal

ion-bound 3D structure. Binding templates have been constructed for regions that

bind 12 types of metal ion-binding residues have been used to construct binding

templates. The templates include residues within 3.5 Å of the metal ion, and the

fragment transformation method was used for structural comparison between query

proteins and templates without any data training. Through the adjustment of

scoring functions, which are based on the similarity of structure and binding

residues. Twelve kinds of metal ions (Ca(2+), Cu(2+), Fe(3+), Mg(2+), Mn(2+),

Zn(2+), Cd(2+), Fe(2+), Ni(2+), Hg(2+), Co(2+), and Cu(+)) binding residues

prediction are supported. MIB also provides the metal ions docking after

prediction. The MIB server is available at http://bioinfo.cmu.edu.tw/MIB/ .

DOI: 10.1021/acs.jcim.6b00407

PMID: 27976886

31. Bioinformatics. 2016 Dec 24. pii: btw725. doi: 10.1093/bioinformatics/btw725.

[Epub ahead of print]

Calypso: a user-friendly web-server for mining and visualizing

microbiome-environment interactions.

Zakrzewski M(1), Proietti C(1), Ellis JJ(2), Hasan S(1,)(2), Brion MJ(2), Berger

B(3), Krause L(1,)(2).

Author information:

(1)QIMR Berghofer Medical Research Institute, Brisbane, QLD 4006, Australia.

(2)The University of Queensland Diamantina Institute, Brisbane, QLD 4102,

Australia. (3)Nestle Research Center, Vers-chez-les-Blanc, Lausanne, Switzerland.

Calypso is an easy-to-use online software suite that allows non-expert users to

mine, interpret and compare taxonomic information from metagenomic or 16S rDNA

datasets. Calypso has a focus on multivariate statistical approaches that can

identify complex environment-microbiome associations. The software enables

quantitative visualizations, statistical testing, multivariate analysis,

supervised learning, factor analysis, multivariable regression, network analysis

and diversity estimates. Comprehensive help pages, tutorials and videos are

provided via a wiki page.AVAILABILITY AND IMPLEMENTATION: The web-interface is

accessible via http://cgenome.net/calypso/ The software is programmed in Java,

PERL and R and the source code is available from Zenodo

(https://zenodo.org/record/50931). The software is freely available for

non-commercial users.

CONTACT: l.krause@uq.edu.auSupplementary information: Supplementary data are

available at Bioinformatics online.

© The Author 2016. Published by Oxford University Press.

DOI: 10.1093/bioinformatics/btw725

PMID: 28025202

32. Bioinformatics. 2016 Dec 23. pii: btw717. doi: 10.1093/bioinformatics/btw717.

[Epub ahead of print]

FUEL-mLoc: feature-unified prediction and explanation of multi-localization of

cellular proteins in multiple organisms.

Wan S(1), Mak MW(2), Kung SY(1).

Author information:

(1)Department of Electrical Engineering, Princeton University, NJ, USA.

(2)Department of Electronic and Information Engineering, The Hong Kong

Polytechnic University, Hong Kong, SAR, China.

Although many web-servers for predicting protein subcellular localization have

been developed, they often have the following drawbacks: (i) lack of

interpretability or interpreting results with heterogenous information which may

confuse users; (ii) ignoring multi-location proteins and (iii) only focusing on

specific organism. To tackle these problems, we present an interpretable and

efficient web-server, namely FUEL-mLoc, using F: eature- U: nified prediction and

E: xplanation of multi- L: ocalization of cellular proteins in multiple

organisms. Compared to conventional localization predictors, FUEL-mLoc has the

following advantages: (i) using unified features (i.e. essential GO terms) to

interpret why a prediction is made; (ii) being capable of predicting both single-

and multi-location proteins and (iii) being able to handle proteins of multiple

organisms, including Eukaryota, Homo sapiens, Viridiplantae, Gram-positive

Bacteria, Gram-negative Bacteria and Virus Experimental results demonstrate that

FUEL-mLoc outperforms state-of-the-art subcellular-localization

predictors.AVAILABILITY AND IMPLEMENTATION:

http://bioinfo.eie.polyu.edu.hk/FUEL-mLoc/ CONTACTS: shibiao.wan@princeton.edu or

enmwmak@polyu.edu.hkSupplementary information: Supplementary data are available

at Bioinformatics online.

© The Author 2016. Published by Oxford University Press. All rights reserved. For

Permissions, please e-mail: journals.permissions@oup.com.

DOI: 10.1093/bioinformatics/btw717

PMID: 28011780

33. BMC Bioinformatics. 2016 Dec 23;17(Suppl 17):469. doi: 10.1186/s12859-016-1328-7.

Multi-CAR: a tool of contig scaffolding using multiple references.

Chen KT(1), Chen CJ(1), Shen HT(1), Liu CL(1), Huang SH(1), Lu CL(2).

Author information:

(1)Department of Computer Science, National Tsing Hua University, Hsinchu, 30013,

Taiwan. (2)Department of Computer Science, National Tsing Hua University,

Hsinchu, 30013, Taiwan. cllu@cs.nthu.edu.tw.

BACKGROUND: A draft genome assembled by current next-generation sequencing

techniques from short reads is just a collection of contigs, whose relative

positions and orientations along the genome being sequenced are unknown. To

further obtain its complete sequence, a contig scaffolding process is usually

applied to order and orient the contigs in the draft genome. Although several

single reference-based scaffolding tools have been proposed, they may produce

erroneous scaffolds if there are rearrangements between the target and reference

genomes or their phylogenetic relationship is distant. This may suggest that a

single reference genome may not be sufficient to produce correct scaffolds of a

draft genome.

RESULTS: In this study, we design a simple heuristic method to further revise our

single reference-based scaffolding tool CAR into a new one called Multi-CAR such

that it can utilize multiple complete genomes of related organisms as references

to more accurately order and orient the contigs of a draft genome. In practical

usage, our Multi-CAR does not require prior knowledge concerning phylogenetic

relationships among the draft and reference genomes and libraries of paired-end

reads. To validate Multi-CAR, we have tested it on a real dataset composed of

several prokaryotic genomes and also compared its accuracy performance with other

multiple reference-based scaffolding tools Ragout and MeDuSa. Our experimental

results have finally shown that Multi-CAR indeed outperforms Ragout and MeDuSa in

terms of sensitivity, precision, genome coverage, scaffold number and scaffold

N50 size.

CONCLUSIONS: Multi-CAR serves as an efficient tool that can more accurately order

and orient the contigs of a draft genome based on multiple reference genomes. The

web server of Multi-CAR is freely available at

http://genome.cs.nthu.edu.tw/Multi-CAR/ .

DOI: 10.1186/s12859-016-1328-7

PMCID: PMC5260120

PMID: 28155633

34. BMC Bioinformatics. 2016 Dec 23;17(Suppl 17):468. doi: 10.1186/s12859-016-1325-x.

Global inference of disease-causing single nucleotide variants from exome

sequencing data.

Wu M(1,)(2), Chen T(1,)(2), Jiang R(3,)(4).

Author information:

(1)MOE Key Laboratory of Bioinformatics; Bioinformatics Division and Center for

Synthetic & Systems Biology, Tsinghua National Laboratory for Information Science

and Technology, Beijing, China. (2)Department of Computer Science, Tsinghua

University, Beijing, China. (3)MOE Key Laboratory of Bioinformatics;

Bioinformatics Division and Center for Synthetic & Systems Biology, Tsinghua

National Laboratory for Information Science and Technology, Beijing, China.

ruijiang@tsinghua.edu.cn. (4)Department of Automation, Tsinghua University,

Beijing, China. ruijiang@tsinghua.edu.cn.

BACKGROUND: Whole exome sequencing (WES) has recently emerged as an effective

approach for identifying genetic variants underlying human diseases. However,

considerable time and labour is needed for careful investigation of candidate

variants. Although filtration based on population frequencies and functional

prediction scores could effectively remove common and neutral variants, hundreds

or even thousands of rare deleterious variants still remain. In addition, current

WES platforms also provide variant information in flanking noncoding regions,

such as promoters, introns and splice sites. Despite of being recognized to

harbour causal variants, these regions are usually ignored by current analysis

pipelines.

RESULTS: We present a novel computational method, called Glints, to overcome the

above limitations. Glints is capable of identifying disease-causing SNVs in both

coding and flanking noncoding regions from exome sequencing data. The principle

behind Glints is that disease-causing variants should manifest their effect at

both variant and gene levels. Specifically, Glints integrates 14 types of

functional scores, including predictions for both coding and noncoding variants,

and 9 types of association scores, which help identifying disease relevant genes.

We conducted a large-scale simulation studies based on 1000 Genomes Project data

and demonstrated the effectiveness of our method in both coding and flanking

noncoding regions. We also applied Glints in two real exome sequencing and

demonstrated its effectiveness for uncovering disease-causing SNVs. Both

standalone software and web server are available at our website

http://bioinfo.au.tsinghua.edu.cn/jianglab/glints .

CONCLUSIONS: Glints is effective for uncovering disease-causing SNVs in coding

and flanking noncoding regions, which is supported by both simulation and real

case studies. Glints is expected to be a useful tool for human genetics research

based on exome sequencing data.

DOI: 10.1186/s12859-016-1325-x

PMCID: PMC5260102

PMID: 28155632

35. BMC Syst Biol. 2016 Dec 23;10(Suppl 4):114. doi: 10.1186/s12918-016-0353-5.

Pretata: predicting TATA binding proteins with novel features and dimensionality

reduction strategy.

Zou Q(1), Wan S(1,)(2), Ju Y(3), Tang J(1,)(4), Zeng X(5).

Author information:

(1)School of Computer Science and Technology, Tianjin University, Tianjin, China.

(2)Key Laboratory of Network Oriented Intelligent Computation, Harbin Institute

of Technology Shenzhen Graduate School, Shenzhen, Guangdong, 518055, China.

(3)School of Information Science and Engineering, Xiamen University, Xiamen,

China. (4)School of Computational Science and Engineering, University of South

Carolina, Columbia, USA. (5)School of Information Science and Engineering, Xiamen

University, Xiamen, China. xzeng@xmu.edu.cn.

BACKGROUND: It is necessary and essential to discovery protein function from the

novel primary sequences. Wet lab experimental procedures are not only

time-consuming, but also costly, so predicting protein structure and function

reliably based only on amino acid sequence has significant value. TATA-binding

protein (TBP) is a kind of DNA binding protein, which plays a key role in the

transcription regulation. Our study proposed an automatic approach for

identifying TATA-binding proteins efficiently, accurately, and conveniently. This

method would guide for the special protein identification with computational

intelligence strategies.

RESULTS: Firstly, we proposed novel fingerprint features for TBP based on pseudo

amino acid composition, physicochemical properties, and secondary structure.

Secondly, hierarchical features dimensionality reduction strategies were employed

to improve the performance furthermore. Currently, Pretata achieves 92.92%

TATA-binding protein prediction accuracy, which is better than all other existing

methods.

CONCLUSIONS: The experiments demonstrate that our method could greatly improve

the prediction accuracy and speed, thus allowing large-scale NGS data prediction

to be practical. A web server is developed to facilitate the other researchers,

which can be accessed at http://server.malab.cn/preTata/ .

DOI: 10.1186/s12918-016-0353-5

PMCID: PMC5259984

PMID: 28155714

36. Bioinformatics. 2016 Dec 22. pii: btw678. doi: 10.1093/bioinformatics/btw678.

[Epub ahead of print]

Improving protein disorder prediction by deep bidirectional long short-term

memory recurrent neural networks.

Hanson J(1), Yang Y(2), Paliwal K(1), Zhou Y(2).

Author information:

(1)Signal Processing Laboratory, Griffith University, Brisbane 4122, Australia.

(2)Institute for Glycomics, Griffith University, Gold Coast 4215, Australia.

MOTIVATION: Capturing long-range interactions between structural but not sequence

neighbors of proteins is a long-standing challenging problem in bioinformatics.

Recently, long short-term memory (LSTM) networks have significantly improved the

accuracy of speech and image classification problems by remembering useful past

information in long sequential events. Here, we have implemented deep

bidirectional LSTM recurrent neural networks in the problem of protein intrinsic

disorder prediction.

RESULTS: The new method, named SPOT-Disorder, has steadily improved over a

similar method using a traditional, window-based neural network (SPINE-D) in all

datasets tested without separate training on short and long disordered regions.

Independent tests on four other datasets including the datasets from critical

assessment of structure prediction (CASP) techniques and >10 000 annotated

proteins from MobiDB, confirmed SPOT-Disorder as one of the best methods in

disorder prediction. Moreover, initial studies indicate that the method is more

accurate in predicting functional sites in disordered regions. These results

highlight the usefulness combining LSTM with deep bidirectional recurrent neural

networks in capturing non-local, long-range interactions for bioinformatics

applications.

AVAILABILITY AND IMPLEMENTATION: SPOT-disorder is available as a web server and

as a standalone program at: http://sparks-lab.org/server/SPOT-disorder/index.php

CONTACT: j.hanson@griffith.edu.au or yuedong.yang@griffith.edu.au or

yaoqi.zhou@griffith.edu.auSupplementary information: Supplementary data is

available at Bioinformatics online.

© The Author 2016. Published by Oxford University Press. All rights reserved. For

Permissions, please e-mail: journals.permissions@oup.com.

DOI: 10.1093/bioinformatics/btw678

PMID: 28011771

37. Bioinformatics. 2016 Dec 22. pii: btw756. doi: 10.1093/bioinformatics/btw756.

[Epub ahead of print]

The PPI3D web server for searching, analyzing and modeling protein-protein

interactions in the context of 3D structures.

Dapkūnas J(1), Timinskas A(1), Olechnovič K(1,)(2), Margelevičius M(1), Dičiūnas

R(1), Venclovas Č(1).

Author information:

(1)Institute of Biotechnology, Vilnius University, Vilnius LT-10257, Lithuania.

(2)Faculty of Mathematics and Informatics, Vilnius University, Vilnius LT-03225,

Lithuania.

The PPI3D web server is focused on searching and analyzing the structural data on

protein-protein interactions. Reducing the data redundancy by clustering and

analyzing the properties of interaction interfaces using Voronoi tessellation

makes this software a highly effective tool for addressing different questions

related to protein interactions.AVAILABILITY AND IMPLEMENTATION: The server is

freely accessible at http://bioinformatics.lt/software/ppi3d/ CONTACT:

ceslovas.venclovas@bti.vu.ltSupplementary information: Supplementary data are

available at Bioinformatics online.

© The Author 2016. Published by Oxford University Press. All rights reserved. For

Permissions, please e-mail: journals.permissions@oup.com.

DOI: 10.1093/bioinformatics/btw756

PMID: 28011769

38. Bioinformatics. 2016 Dec 22. pii: btw783. doi: 10.1093/bioinformatics/btw783.

[Epub ahead of print]

RADER: a RApid DEcoy Retriever to facilitate decoy based assessment of virtual

screening.

Wang L(1), Pang X(1), Li Y(1), Zhang Z(2), Tan W(1).

Author information:

(1)Pre-Incubator for Innovative Drugs & Medicine, School of Bioscience and

Bioengineering, South China University of Technology, 382 East Circle at Higher

Education Mega Center, Guangzhou 510006, China. (2)Institute of Biomedical and

Pharmaceutical Sciences, Guangdong University of Technology, Guangzhou 510006,

China.

Evaluation of the capacity for separating actives from challenging decoys is a

crucial metric of performance related to molecular docking or a virtual screening

workflow. The Directory of Useful Decoys (DUD) and its enhanced version (DUD-E)

provide a benchmark for molecular docking, although they only contain a limited

set of decoys for limited targets. DecoyFinder was released to compensate the

limitations of DUD or DUD-E for building target-specific decoy sets. However,

desirable query template design, generation of multiple decoy sets of similar

quality, and computational speed remain bottlenecks, particularly when the

numbers of queried actives and retrieved decoys increases to hundreds or more.

Here, we developed a program suite called RApid DEcoy Retriever (RADER) to

facilitate the decoy-based assessment of virtual screening. This program adopts a

novel database-management regime that supports rapid and large-scale retrieval of

decoys, enables high portability of databases, and provides multifaceted options

for designing initial query templates from a large number of active ligands and

generating subtle decoy sets. RADER provides two operational modes: as a

command-line tool and on a web server. Validation of the performance and

efficiency of RADER was also conducted and is described.AVAILABILITY AND

IMPLEMENTATION: RADER web server and a local version are freely available at

http://rcidm.org/rader/ CONTACT: lingwang@scut.edu.cn or

went@scut.edu.cnSupplementary information: Supplementary data are available at

Bioinformatics online.

© The Author 2016. Published by Oxford University Press. All rights reserved. For

Permissions, please e-mail: journals.permissions@oup.com.

DOI: 10.1093/bioinformatics/btw783

PMID: 28011765

39. BMC Genomics. 2016 Dec 22;17(Suppl 13):1023. doi: 10.1186/s12864-016-3329-3.

LocExpress: a web server for efficiently estimating expression of novel

transcripts.

Hou M(1), Tian F(1,)(2), Jiang S(1), Kong L(1), Yang D(1), Gao G(3).

Author information:

(1)State Key Laboratory of Protein and Plant Gene Research, College of Life

Sciences, Center for Bioinformatics, Peking University, Beijing, 100871, People's

Republic of China. (2)Peking-Tsinghua Center for Life Sciences, Academy for

Advanced Interdisciplinary Studies, Peking University, Beijing, 100871, People's

Republic of China. (3)State Key Laboratory of Protein and Plant Gene Research,

College of Life Sciences, Center for Bioinformatics, Peking University, Beijing,

100871, People's Republic of China. gaog@mail.cbi.pku.edu.cn.

BACKGROUND: The temporal and spatial-specific expression pattern of a transcript

in multiple tissues and cell types can indicate key clues about its function.

While several gene atlas available online as pre-computed databases for known

gene models, it's still challenging to get expression profile for previously

uncharacterized (i.e. novel) transcripts efficiently.

RESULTS: Here we developed LocExpress, a web server for efficiently estimating

expression of novel transcripts across multiple tissues and cell types in human

(20 normal tissues/cells types and 14 cell lines) as well as in mouse (24 normal

tissues/cell types and nine cell lines). As a wrapper to RNA-Seq quantification

algorithm, LocExpress efficiently reduces the time cost by making abundance

estimation calls increasingly within the minimum spanning bundle region of input

transcripts. For a given novel gene model, such local context-oriented strategy

allows LocExpress to estimate its FPKMs in hundreds of samples within minutes on

a standard Linux box, making an online web server possible.

CONCLUSIONS: To the best of our knowledge, LocExpress is the only web server to

provide nearly real-time expression estimation for novel transcripts in common

tissues and cell types. The server is publicly available at

http://loc-express.cbi.pku.edu.cn .

DOI: 10.1186/s12864-016-3329-3

PMCID: PMC5260097

PMID: 28155723

40. BMC Genomics. 2016 Dec 22;17(Suppl 13):1035. doi: 10.1186/s12864-016-3328-4.

ESAP plus: a web-based server for EST-SSR marker development.

Ponyared P(1), Ponsawat J(2), Tongsima S(3), Seresangtakul P(4), Akkasaeng C(5),

Tantisuwichwong N(6).

Author information:

(1)Department of Biology, Faculty of Science, Khon Kaen University, Khon Kaen,

40002, Thailand. (2)Department of Computer Engineering, Faculty of Engineering,

Khon Kaen University, Khon Kaen, 40002, Thailand. (3)National Center for Genetic

Engineering and Biotechnology (BIOTEC), Pathum Thani, 12120, Thailand.

(4)Department of Computer Science, Faculty of Science, Khon Kaen University, Khon

Kaen, 40002, Thailand. (5)Department of Plant Science and Agricultural Resources,

Faculty of Agriculture, Khon Kaen University, Khon Kaen, 40002, Thailand.

(6)Department of Biology, Faculty of Science, Khon Kaen University, Khon Kaen,

40002, Thailand. naptan@kku.ac.th.

BACKGROUND: Simple sequence repeats (SSRs) have become widely used as molecular

markers in plant genetic studies due to their abundance, high allelic variation

at each locus and simplicity to analyze using conventional PCR amplification. To

study plants with unknown genome sequence, SSR markers from Expressed Sequence

Tags (ESTs), which can be obtained from the plant mRNA (converted to cDNA), must

be utilized. With the advent of high-throughput sequencing technology, huge EST

sequence data have been generated and are now accessible from many public

databases. However, SSR marker identification from a large in-house or public EST

collection requires a computational pipeline that makes use of several standard

bioinformatic tools to design high quality EST-SSR primers. Some of these

computational tools are not users friendly and must be tightly integrated with

reference genomic databases.

RESULTS: A web-based bioinformatic pipeline, called EST Analysis Pipeline Plus

(ESAP Plus), was constructed for assisting researchers to develop SSR markers

from a large EST collection. ESAP Plus incorporates several bioinformatic scripts

and some useful standard software tools necessary for the four main procedures of

EST-SSR marker development, namely 1) pre-processing, 2) clustering and assembly,

3) SSR mining and 4) SSR primer design. The proposed pipeline also provides two

alternative steps for reducing EST redundancy and identifying SSR loci. Using

public sugarcane ESTs, ESAP Plus automatically executed the aforementioned

computational pipeline via a simple web user interface, which was implemented

using standard PHP, HTML, CSS and Java scripts. With ESAP Plus, users can upload

raw EST data and choose various filtering options and parameters to analyze each

of the four main procedures through this web interface. All input EST data and

their predicted SSR results will be stored in the ESAP Plus MySQL database. Users

will be notified via e-mail when the automatic process is completed and they can

download all the results through the web interface.

CONCLUSIONS: ESAP Plus is a comprehensive and convenient web-based bioinformatic

tool for SSR marker development. ESAP Plus offers all necessary EST-SSR

development processes with various adjustable options that users can easily use

to identify SSR markers from a large EST collection. With familiar web interface,

users can upload the raw EST using the data submission page and

visualize/download the corresponding EST-SSR information from within ESAP Plus.

ESAP Plus can handle considerably large EST datasets. This EST-SSR discovery tool

can be accessed directly from: http://gbp.kku.ac.th/esap_plus/ .

DOI: 10.1186/s12864-016-3328-4

PMCID: PMC5260030

PMID: 28155670

41. BMC Genomics. 2016 Dec 22;17(Suppl 13):1027. doi: 10.1186/s12864-016-3326-6.

TEA: the epigenome platform for Arabidopsis methylome study.

Su SY(1,)(2,)(3), Chen SH(2), Lu IH(2), Chiang YS(4), Wang YB(2), Chen PY(5), Lin

CY(6,)(7,)(8).

Author information:

(1)Bioinformatics Program, Taiwan International Graduate Program, Institute of

Information Science, Academia Sinica, Taipei, Taiwan. (2)Institute of Information

Science, Academia Sinica, Taipei, Taiwan. (3)Institute of Biomedical Informatics,

National Yang-Ming University, Taipei, Taiwan. (4)Institute of Plant and

Microbial Biology, Academia Sinica, Taipei, Taiwan. (5)Institute of Plant and

Microbial Biology, Academia Sinica, Taipei, Taiwan. paoyang@gate.sinica.edu.tw.

(6)Institute of Information Science, Academia Sinica, Taipei, Taiwan.

cylin@iis.sinica.edu.tw. (7)Division of Biostatistics and Bioinformatics,

Institute of Population Health Sciences, National Health Research Institutes,

Zhunan, Miaoli, Taiwan. cylin@iis.sinica.edu.tw. (8)Institute of Fisheries

Science, College of Life Science, National Taiwan University, Taipei, Taiwan.

cylin@iis.sinica.edu.tw.

BACKGROUND: Bisulfite sequencing (BS-seq) has become a standard technology to

profile genome-wide DNA methylation at single-base resolution. It allows

researchers to conduct genome-wise cytosine methylation analyses on issues about

genomic imprinting, transcriptional regulation, cellular development and

differentiation. One single data from a BS-Seq experiment is resolved into many

features according to the sequence contexts, making methylome data analysis and

data visualization a complex task.

RESULTS: We developed a streamlined platform, TEA, for analyzing and visualizing

data from whole-genome BS-Seq (WGBS) experiments conducted in the model plant

Arabidopsis thaliana. To capture the essence of the genome methylation level and

to meet the efficiency for running online, we introduce a straightforward method

for measuring genome methylation in each sequence context by gene. The method is

scripted in Java to process BS-Seq mapping results. Through a simple data

uploading process, the TEA server deploys a web-based platform for deep analysis

by linking data to an updated Arabidopsis annotation database and toolkits.

CONCLUSIONS: TEA is an intuitive and efficient online platform for analyzing the

Arabidopsis genomic DNA methylation landscape. It provides several ways to help

users exploit WGBS data. TEA is freely accessible for academic users at:

http://tea.iis.sinica.edu.tw .

DOI: 10.1186/s12864-016-3326-6

PMCID: PMC5260138

PMID: 28155665

42. BMC Genomics. 2016 Dec 22;17(Suppl 13):1033. doi: 10.1186/s12864-016-3323-9.

An ensemble micro neural network approach for elucidating interactions between

zinc finger proteins and their target DNA.

Dutta S(1), Madan S(1), Parikh H(2), Sundar D(3).

Author information:

(1)Department of Biochemical Engineering and Biotechnology, DBT-AIST

International Laboratory for Advanced Biomedicine (DAILAB), Indian Institute of

Technology Delhi, New Delhi, 110016, India. (2)Department of Computer Science and

Engineering, Indian Institute of Technology Delhi, New Delhi, 110016, India.

(3)Department of Biochemical Engineering and Biotechnology, DBT-AIST

International Laboratory for Advanced Biomedicine (DAILAB), Indian Institute of

Technology Delhi, New Delhi, 110016, India. sundar@dbeb.iitd.ac.in.

BACKGROUND: The ability to engineer zinc finger proteins binding to a DNA

sequence of choice is essential for targeted genome editing to be possible.

Experimental techniques and molecular docking have been successful in predicting

protein-DNA interactions, however, they are highly time and resource intensive.

Here, we present a novel algorithm designed for high throughput prediction of

optimal zinc finger protein for 9 bp DNA sequences of choice. In accordance with

the principles of information theory, a subset identified by using K-means

clustering was used as a representative for the space of all possible 9 bp DNA

sequences. The modeling and simulation results assuming synergistic mode of

binding obtained from this subset were used to train an ensemble micro neural

network. Synergistic mode of binding is the closest to the DNA-protein binding

seen in nature, and gives much higher quality predictions, while the time and

resources increase exponentially in the trade off. Our algorithm is inspired from

an ensemble machine learning approach, and incorporates the predictions made by

100 parallel neural networks, each with a different hidden layer architecture

designed to pick up different features from the training dataset to predict

optimal zinc finger proteins for any 9 bp target DNA.

RESULTS: The model gave an accuracy of an average 83% sequence identity for the

testing dataset. The BLAST e-value are well within the statistical confidence

interval of E-05 for 100% of the testing samples. The geometric mean and median

value for the BLAST e-values were found to be 1.70E-12 and 7.00E-12 respectively.

For final validation of approach, we compared our predictions against optimal

ZFPs reported in literature for a set of experimentally studied DNA sequences.

The accuracy, as measured by the average string identity between our predictions

and the optimal zinc finger protein reported in literature for a 9 bp DNA target

was found to be as high as 81% for DNA targets with a consensus sequence

GCNGNNGCN reported in literature. Moreover, the average string identity of our

predictions for a catalogue of over 100 9 bp DNA for which the optimal zinc

finger protein has been reported in literature was found to be 71%.

CONCLUSIONS: Validation with experimental data shows that our tool is capable of

domain adaptation and thus scales well to datasets other than the training set

with high accuracy. As synergistic binding comes the closest to the ideal mode of

binding, our algorithm predicts biologically relevant results in sync with the

experimental data present in the literature. While there have been disjointed

attempts to approach this problem synergistically reported in literature, there

is no work covering the whole sample space. Our algorithm allows designing zinc

finger proteins for DNA targets of the user's choice, opening up new frontiers in

the field of targeted genome editing. This algorithm is also available as an easy

to use web server, ZifNN, at http://web.iitd.ac.in/~sundar/ZifNN/ .

DOI: 10.1186/s12864-016-3323-9

PMCID: PMC5260015

PMID: 28155662

43. BMC Genomics. 2016 Dec 22;17(Suppl 13):1037. doi: 10.1186/s12864-016-3324-8.

Exploiting the recognition code for elucidating the mechanism of zinc finger

protein-DNA interactions.

Dutta S(1), Madan S(1), Sundar D(2).

Author information:

(1)Department of Biochemical Engineering and Biotechnology, DBT-AIST

International Laboratory for Advanced Biomedicine (DAILAB), Indian Institute of

Technology Delhi, New Delhi, 110016, India. (2)Department of Biochemical

Engineering and Biotechnology, DBT-AIST International Laboratory for Advanced

Biomedicine (DAILAB), Indian Institute of Technology Delhi, New Delhi, 110016,

India. sundar@dbeb.iitd.ac.in.

BACKGROUND: Engineering zinc finger protein motifs for specific binding to

double-stranded DNA is critical for targeted genome editing. Most existing tools

for predicting DNA-binding specificity in zinc fingers are trained on data

obtained from naturally occurring proteins, thereby skewing the predictions.

Moreover, these mostly neglect the cooperativity exhibited by zinc fingers.

METHODS: Here, we present an ab-initio method that is based on mutation of the

key α-helical residues of individual fingers of the parent template for Zif-268

and its consensus sequence (PDB ID: 1AAY). In an attempt to elucidate the

mechanism of zinc finger protein-DNA interactions, we evaluated and compared

three approaches, differing in the amino acid mutations introduced in the Zif-268

parent template, and the mode of binding they try to mimic, i.e., modular and

synergistic mode of binding.

RESULTS: Comparative evaluation of the three strategies reveals that the

synergistic mode of binding appears to mimic the ideal mechanism of DNA-zinc

finger protein binding. Analysis of the predictions made by all three strategies

indicate strong dependence of zinc finger binding specificity on the amino acid

propensity and the position of a 3-bp DNA sub-site in the target DNA sequence.

Moreover, the binding affinity of the individual zinc fingers was found to

increase in the order Finger 1 < Finger 2 < Finger 3, thus confirming the

cooperative effect.

CONCLUSIONS: Our analysis offers novel insights into the prediction of ZFPs for

target DNA sequences and the approaches have been made available as an easy to

use web server at http://web.iitd.ac.in/~sundar/zifpredict_ihbe.

DOI: 10.1186/s12864-016-3324-8

PMCID: PMC5260074

PMID: 28155654

44. J Cheminform. 2016 Dec 20;8:72. doi: 10.1186/s13321-016-0185-8. eCollection 2016.

osFP: a web server for predicting the oligomeric states of fluorescent proteins.

Simeon S(1), Shoombuatong W(1), Anuwongcharoen N(1), Preeyanon L(2),

Prachayasittikul V(2), Wikberg JE(3), Nantasenamat C(1).

Author information:

(1)Center of Data Mining and Biomedical Informatics, Faculty of Medical

Technology, Mahidol University, Bangkok, 10700 Thailand. (2)Department of

Community Medical Technology, Faculty of Medical Technology, Mahidol University,

Bangkok, 10700 Thailand. (3)Department of Pharmaceutical Biosciences, Uppsala

University, 751 24 Uppsala, Sweden.

BACKGROUND: Currently, monomeric fluorescent proteins (FP) are ideal markers for

protein tagging. The prediction of oligomeric states is helpful for enhancing

live biomedical imaging. Computational prediction of FP oligomeric states can

accelerate the effort of protein engineering efforts of creating monomeric FPs.

To the best of our knowledge, this study represents the first computational model

for predicting and analyzing FP oligomerization directly from the amino acid

sequence.

RESULTS: After data curation, an exhaustive data set consisting of 397

non-redundant FP oligomeric states was compiled from the literature. Results from

benchmarking of the protein descriptors revealed that the model built with amino

acid composition descriptors was the top performing model with accuracy,

sensitivity and specificity in excess of 80% and MCC greater than 0.6 for all

three data subsets (e.g. training, tenfold cross-validation and external sets).

The model provided insights on the important residues governing the

oligomerization of FP. To maximize the benefit of the generated predictive model,

it was implemented as a web server under the R programming environment.

CONCLUSION: osFP affords a user-friendly interface that can be used to predict

the oligomeric state of FP using the protein sequence. The advantage of osFP is

that it is platform-independent meaning that it can be accessed via a web browser

on any operating system and device. osFP is freely accessible at

http://codes.bio/osfp/ while the source code and data set is provided on GitHub

at https://github.com/chaninn/osFP/.Graphical Abstract.

DOI: 10.1186/s13321-016-0185-8

PMCID: PMC5167684

PMID: 28053671

45. Retrovirology. 2016 Dec 20;13(1):85. doi: 10.1186/s12977-016-0320-7.

A genotypic method for determining HIV-2 coreceptor usage enables epidemiological

studies and clinical decision support.

Döring M(1), Borrego P(2,)(3), Büch J(4), Martins A(2), Friedrich G(4), Camacho

RJ(5), Eberle J(6), Kaiser R(7), Lengauer T(4), Taveira N(2,)(8), Pfeifer N(9).

Author information:

(1)Department for Computational Biology and Applied Algorithmics, Max Planck

Institute for Informatics, Saarland Informatics Campus, Campus E 1 4, 66123,

Saarbrücken, Germany. mdoering@mpi-inf.mpg.de. (2)Research Institute for

Medicines (iMed.ULisboa), Faculty of Pharmacy, University of Lisbon, Av.

Professor Gama Pinto, 1649-003, Lisbon, Portugal. (3)Centro de Administração e

Políticas Públicas (CAPP), Instituto Superior de Ciências Sociais e Políticas

(ISCSP), University of Lisbon, Rua Almerindo Lessa, 1300-663, Lisbon, Portugal.

(4)Department for Computational Biology and Applied Algorithmics, Max Planck

Institute for Informatics, Saarland Informatics Campus, Campus E 1 4, 66123,

Saarbrücken, Germany. (5)Rega Institute for Medical Research, Clinical and

Epidemiological Virology, Department of Microbiology and Immunology, KU

Leuven-University of Leuven, Minderbroedersstraat 10, 3000, Louvain, Belgium.

(6)Department of Virology, Max von Pettenkofer-Institut,

Ludwig-Maximilians-University, Pettenkoferstraße 9a, 80336, Munich, Germany.

(7)Institute for Virology, University of Cologne, Fürst-Pückler-Str. 56, 50935,

Cologne, Germany. (8)Instituto Superior de Ciências da Saúde Egas Moniz (ISCSEM),

Campus Universitário, Quinta da Granja, Monte de Caparica, 2829-511, Caparica,

Portugal. (9)Department for Computational Biology and Applied Algorithmics, Max

Planck Institute for Informatics, Saarland Informatics Campus, Campus E 1 4,

66123, Saarbrücken, Germany. npfeifer@mpi-inf.mpg.de.

BACKGROUND: CCR5-coreceptor antagonists can be used for treating HIV-2 infected

individuals. Before initiating treatment with coreceptor antagonists, viral

coreceptor usage should be determined to ensure that the virus can use only the

CCR5 coreceptor (R5) and cannot evade the drug by using the CXCR4 coreceptor

(X4-capable). However, until now, no online tool for the genotypic identification

of HIV-2 coreceptor usage had been available. Furthermore, there is a lack of

knowledge on the determinants of HIV-2 coreceptor usage. Therefore, we developed

a data-driven web service for the prediction of HIV-2 coreceptor usage from the

V3 loop of the HIV-2 glycoprotein and used the tool to identify novel

discriminatory features of X4-capable variants.

RESULTS: Using 10 runs of tenfold cross validation, we selected a linear support

vector machine (SVM) as the model for geno2pheno[coreceptor-hiv2], because it

outperformed the other SVMs with an area under the ROC curve (AUC) of 0.95. We

found that SVMs were highly accurate in identifying HIV-2 coreceptor usage,

attaining sensitivities of 73.5% and specificities of 96% during tenfold nested

cross validation. The predictive performance of SVMs was not significantly

different (p value 0.37) from an existing rules-based approach. Moreover,

geno2pheno[coreceptor-hiv2] achieved a predictive accuracy of 100% and

outperformed the existing approach on an independent data set containing nine new

isolates with corresponding phenotypic measurements of coreceptor usage.

geno2pheno[coreceptor-hiv2] could not only reproduce the established markers of

CXCR4-usage, but also revealed novel markers: the substitutions 27K, 15G, and 8S

were significantly predictive of CXCR4 usage. Furthermore, SVMs trained on the

amino-acid sequences of the V1 and V2 loops were also quite accurate in

predicting coreceptor usage (AUCs of 0.84 and 0.65, respectively).

CONCLUSIONS: In this study, we developed geno2pheno[coreceptor-hiv2], the first

online tool for the prediction of HIV-2 coreceptor usage from the V3 loop. Using

our method, we identified novel amino-acid markers of X4-capable variants in the

V3 loop and found that HIV-2 coreceptor usage is also influenced by the V1/V2

region. The tool can aid clinicians in deciding whether coreceptor antagonists

such as maraviroc are a treatment option and enables epidemiological studies

investigating HIV-2 coreceptor usage. geno2pheno[coreceptor-hiv2] is freely

available at http://coreceptor-hiv2.geno2pheno.org .

DOI: 10.1186/s12977-016-0320-7

PMCID: PMC5168878

PMID: 27998283

46. Bioinformatics. 2016 Dec 19. pii: btw702. [Epub ahead of print]

GENIUS: web server to predict local gene networks and key genes for biological

functions.

Puelma T(1,)(2), Araus V(1), Canales J(1), Vidal EA(1), Cabello JM(1), Soto A(2),

Gutiérrez RA(1).

Author information:

(1)Millennium Nucleus Center for Plant Systems and Synthetic Biology, FONDAP

Center for Genome Regulation, Departamento de Genética Molecular y Microbiología,

Facultad de Ciencias Biológicas, Pontificia Universidad Católica de Chile,

Santiago 8331150, Chile. (2)Millennium Nucleus Center for Plant Systems and

Synthetic Biology, Departamento de Ciencias de la Computación, Facultad de

Ingeniería, Pontificia Universidad Católica de Chile, Santiago 7820436, Chile.

GENIUS is a user-friendly web server that uses a novel machine learning algorithm

to infer functional gene networks focused on specific genes and experimental

conditions that are relevant to biological functions of interest. These functions

may have different levels of complexity, from specific biological processes to

complex traits that involve several interacting processes. GENIUS also enriches

the network with new genes related to the biological function of interest, with

accuracies comparable to highly discriminative Support Vector Machine

methods.AVAILABILITY AND IMPLEMENTATION: GENIUS currently supports eight model

organisms and is freely available for public use at

http://networks.bio.puc.cl/genius CONTACT: genius.psbl@gmail.comSupplementary

information: Supplementary data are available at Bioinformatics online.

© The Author 2016. Published by Oxford University Press.

DOI: 10.1093/bioinformatics/btw702

PMID: 27993775

47. Bioinformatics. 2016 Dec 15;32(24):3745-3752. Epub 2016 Aug 26.

Imbalanced multi-label learning for identifying antimicrobial peptides and their

functional types.

Lin W(1,)(2), Xu D(2).

Author information:

(1)nformation Engineering School, Jingdezhen Ceramic Institute, Jingdezhen

333406, China. (2)Department of Computer Science and Christopher S. Bond Life

Sciences Center, University of Missouri, Columbia, MO 65211, USA.

MOTIVATION: With the rapid increase of infection resistance to antibiotics, it is

urgent to find novel infection therapeutics. In recent years, antimicrobial

peptides (AMPs) have been utilized as potential alternatives for infection

therapeutics. AMPs are key components of the innate immune system and can protect

the host from various pathogenic bacteria. Identifying AMPs and their functional

types has led to many studies, and various predictors using machine learning have

been developed. However, there is room for improvement; in particular, no

predictor takes into account the lack of balance among different functional AMPs.

RESULTS: In this paper, a new synthetic minority over-sampling technique on

imbalanced and multi-label datasets, referred to as ML-SMOTE, was designed for

processing and identifying AMPs' functional families. A novel multi-label

classifier, MLAMP, was also developed using ML-SMOTE and grey pseudo amino acid

composition. The classifier obtained 0.4846 subset accuracy and 0.16 hamming

loss.

AVAILABILITY AND IMPLEMENTATION: A user-friendly web-server for MLAMP was

established at http://www.jci-bioinfo.cn/MLAMP CONTACTS: linweizhong@jci.edu.cn

or xudong@missouri.edu.

© The Author 2016. Published by Oxford University Press. All rights reserved. For

Permissions, please e-mail: journals.permissions@oup.com.

DOI: 10.1093/bioinformatics/btw560

PMCID: PMC5167070 [Available on 2017-12-15]

PMID: 27565585

48. Front Microbiol. 2016 Dec 15;7:2010. doi: 10.3389/fmicb.2016.02010. eCollection

2016.

Construction of a Pan-Genome Allele Database of Salmonella enterica Serovar

Enteritidis for Molecular Subtyping and Disease Cluster Identification.

Liu YY(1), Chen CC(2), Chiou CS(1).

Author information:

(1)Central Regional Laboratory, Center for Diagnostics and Vaccine Development,

Centers for Disease Control Taichung, Taiwan. (2)Institute of Medical Science and

Technology, National Sun Yat-sen UniversityKaohsiung, Taiwan; Medical Science and

Technology Center, National Sun Yat-sen UniversityKaohsiung, Taiwan.

We built a pan-genome allele database with 395 genomes of Salmonella enterica

serovar Enteritidis and developed computer tools for analysis of whole genome

sequencing (WGS) data of bacterial isolates for disease cluster identification. A

web server (http://wgmlst.imst.nsysu.edu.tw) was set up with the database and the

tools, allowing users to upload WGS data to generate whole genome multilocus

sequence typing (wgMLST) profiles and to perform cluster analysis of wgMLST

profiles. The usefulness of the database in disease cluster identification was

demonstrated by analyzing a panel of genomes from 55 epidemiologically

well-defined S. Enteritidis isolates provided by the Minnesota Department of

Health. The wgMLST-based cluster analysis revealed distinct clades that were

concordant with the epidemiologically defined outbreaks. Thus, using a common

pan-genome allele database, wgMLST can be a promising WGS-based subtyping

approach for disease surveillance and outbreak investigation across laboratories.

DOI: 10.3389/fmicb.2016.02010

PMCID: PMC5156723

PMID: 28018331

49. Oncotarget. 2016 Dec 13;7(50):82440-82449. doi: 10.18632/oncotarget.12517.

Identification of self-interacting proteins by exploring evolutionary information

embedded in PSI-BLAST-constructed position specific scoring matrix.

An JY(1), You ZH(2), Chen X(3), Huang DS(4), Li ZW(1), Liu G(5), Wang Y(1).

Author information:

(1)School of Computer Science and Technology, China University of Mining and

Technology, Xuzhou 21116, China. (2)Xinjiang Technical Institute of Physics and

Chemistry, Chinese Academy of Science, Urumqi 830011, China. (3)School of

Information and Electrical Engineering, China University of Mining and

Technology, Xuzhou 221116, China. (4)School of Electronics and Information

Engineering, Tongji University, Shanghai 201804, China. (5)College of Computer

Science and Software Engineering, Shenzhen University, Shenzhen, Guangdong

518060, China.

Self-interacting Proteins (SIPs) play an essential role in a wide range of

biological processes, such as gene expression regulation, signal transduction,

enzyme activation and immune response. Because of the limitations for

experimental self-interaction proteins identification, developing an effective

computational method based on protein sequence to detect SIPs is much important.

In the study, we proposed a novel computational approach called RVMBIGP that

combines the Relevance Vector Machine (RVM) model and Bi-gram probability (BIGP)

to predict SIPs based on protein sequence. The proposed prediction model includes

as following steps: (1) an effective feature extraction method named BIGP is used

to represent protein sequences on Position Specific Scoring Matrix (PSSM); (2)

Principal Component Analysis (PCA) method is employed for integrating the useful

information and reducing the influence of noise; (3) the robust classifier

Relevance Vector Machine (RVM) is used to carry out classification. When

performed on yeast and human datasets, the proposed RVMBIGP model can achieve

very high accuracies of 95.48% and 98.80%, respectively. The experimental results

show that our proposed method is very promising and may provide a cost-effective

alternative for SIPs identification. In addition, to facilitate extensive studies

for future proteomics research, the RVMBIGP server is freely available for

academic use at http://219.219.62.123:8888/RVMBIGP.

DOI: 10.18632/oncotarget.12517

PMID: 27732957

50. Sci Rep. 2016 Dec 13;6:38881. doi: 10.1038/srep38881.

Performance Evaluation and Online Realization of Data-driven Normalization

Methods Used in LC/MS based Untargeted Metabolomics Analysis.

Li B(1), Tang J(1), Yang Q(1), Cui X(1), Li S(1), Chen S(2), Cao Q(1), Xue W(1),

Chen N(1), Zhu F(1).

Author information:

(1)Innovative Drug Research and Bioinformatics Group, Innovative Drug Research

Centre and School of Pharmaceutical Sciences, Chongqing University, Chongqing

401331, China. (2)College of Mathematics and Statistics, Chongqing University,

Chongqing 401331, China.

In untargeted metabolomics analysis, several factors (e.g., unwanted experimental

&biological variations and technical errors) may hamper the identification of

differential metabolic features, which requires the data-driven normalization

approaches before feature selection. So far, ≥16 normalization methods have been

widely applied for processing the LC/MS based metabolomics data. However, the

performance and the sample size dependence of those methods have not yet been

exhaustively compared and no online tool for comparatively and comprehensively

evaluating the performance of all 16 normalization methods has been provided. In

this study, a comprehensive comparison on these methods was conducted. As a

result, 16 methods were categorized into three groups based on their

normalization performances across various sample sizes. The VSN, the Log

Transformation and the PQN were identified as methods of the best normalization

performance, while the Contrast consistently underperformed across all

sub-datasets of different benchmark data. Moreover, an interactive web tool

comprehensively evaluating the performance of 16 methods specifically for

normalizing LC/MS based metabolomics data was constructed and hosted at

http://server.idrb.cqu.edu.cn/MetaPre/. In summary, this study could serve as a

useful guidance to the selection of suitable normalization methods in analyzing

the LC/MS based metabolomics data.

DOI: 10.1038/srep38881

PMCID: PMC5153651

PMID: 27958387

51. F1000Res. 2016 Dec 12;5. pii: ELIXIR-2841. doi: 10.12688/f1000research.10221.1.

eCollection 2016.

Integration of EGA secure data access into Galaxy.

Hoogstrate Y(1), Zhang C(2), Senf A(3), Bijlard J(4), Hiltemann S(1), van

Enckevort D(5), Repo S(6), Heringa J(2), Jenster G(7), J A Fijneman R(8), Boiten

JW(9), A Meijer G(8), Stubbs A(1), Rambla J(10), Spalding D(3), Abeln S(2).

Author information:

(1)Department of Bioinformatics, ErasmusMC Rotterdam, Rotterdam, Netherlands.

(2)Department of Computer Science, Vrije Universiteit, Amsterdam, Netherlands.

(3)European Molecular Biology Laboratory, European Bioinformatics Institute,

Wellcome Genome Campus, Hinxton, UK. (4)The Hyve, Utrecht, Netherlands.

(5)Genomics Coordination Centre, UMC Groningen, Groningen, Netherlands. (6)ELIXIR

Hub, Wellcome Genome Campus, Hinxton, UK. (7)Department of Urology, ErasmusMC

Rotterdam, Rotterdam, Netherlands. (8)Diagnostic Oncology, Netherlands Cancer

Institute, Amsterdam, Netherlands. (9)Lygature, Utrecht, Netherlands. (10)Centre

for Genomic Regulation, Parc de Recerca Biomédica de Barcelona, Barcelona, Spain.

High-throughput molecular profiling techniques are routinely generating vast

amounts of data for translational medicine studies. Secure access controlled

systems are needed to manage, store, transfer and distribute these data due to

its personally identifiable nature. The European Genome-phenome Archive (EGA) was

created to facilitate access and management to long-term archival of

bio-molecular data. Each data provider is responsible for ensuring a Data Access

Committee is in place to grant access to data stored in the EGA. Moreover, the

transfer of data during upload and download is encrypted. ELIXIR, a European

research infrastructure for life-science data, initiated a project (2016 Human

Data Implementation Study) to understand and document the ELIXIR requirements for

secure management of controlled-access data. As part of this project, a full

ecosystem was designed to connect archived raw experimental molecular profiling

data with interpreted data and the computational workflows, using the CTMM

Translational Research IT (CTMM-TraIT) infrastructure http://www.ctmm-trait.nl as

an example. Here we present the first outcomes of this project, a framework to

enable the download of EGA data to a Galaxy server in a secure way. Galaxy

provides an intuitive user interface for molecular biologists and

bioinformaticians to run and design data analysis workflows. More specifically,

we developed a tool -- ega_download_streamer - that can download data securely

from EGA into a Galaxy server, which can subsequently be further processed. This

tool will allow a user within the browser to run an entire analysis containing

sensitive data from EGA, and to make this analysis available for other

researchers in a reproducible manner, as shown with a proof of concept study.

 The tool ega_download_streamer is available in the Galaxy tool shed:

https://toolshed.g2.bx.psu.edu/view/yhoogstrate/ega_download_streamer.

DOI: 10.12688/f1000research.10221.1

PMCID: PMC5302147

PMID: 28232859

Conflict of interest statement: Competing interests: No competing interests were

disclosed.

52. G3 (Bethesda). 2016 Dec 7;6(12):3927-3939. doi: 10.1534/g3.116.034744.

Reconstructing the Backbone of the Saccharomycotina Yeast Phylogeny Using

Genome-Scale Data.

Shen XX(1), Zhou X(1), Kominek J(2), Kurtzman CP(3), Hittinger CT(4), Rokas A(5).

Author information:

(1)Department of Biological Sciences, Vanderbilt University, Nashville, Tennessee

37235. (2)Laboratory of Genetics, Genome Center of Wisconsin, DOE Great Lakes

Bioenergy Research Center, Wisconsin Energy Institute, J. F. Crow Institute for

the Study of Evolution, University of Wisconsin-Madison, Madison, Wisconsin

53706. (3)Mycotoxin Prevention and Applied Microbiology Research Unit, National

Center for Agricultural Utilization Research, Agricultural Research Service, U.S.

Department of Agriculture, Peoria, Illinois 61604 antonis.rokas@vanderbilt.edu.

(4)Laboratory of Genetics, Genome Center of Wisconsin, DOE Great Lakes Bioenergy

Research Center, Wisconsin Energy Institute, J. F. Crow Institute for the Study

of Evolution, University of Wisconsin-Madison, Madison, Wisconsin 53706

antonis.rokas@vanderbilt.edu. (5)Department of Biological Sciences, Vanderbilt

University, Nashville, Tennessee 37235 antonis.rokas@vanderbilt.edu.

Understanding the phylogenetic relationships among the yeasts of the subphylum

Saccharomycotina is a prerequisite for understanding the evolution of their

metabolisms and ecological lifestyles. In the last two decades, the use of rDNA

and multilocus data sets has greatly advanced our understanding of the yeast

phylogeny, but many deep relationships remain unsupported. In contrast,

phylogenomic analyses have involved relatively few taxa and lineages that were

often selected with limited considerations for covering the breadth of yeast

biodiversity. Here we used genome sequence data from 86 publicly available yeast

genomes representing nine of the 11 known major lineages and 10 nonyeast fungal

outgroups to generate a 1233-gene, 96-taxon data matrix. Species phylogenies

reconstructed using two different methods (concatenation and coalescence) and two

data matrices (amino acids or the first two codon positions) yielded identical

and highly supported relationships between the nine major lineages. Aside from

the lineage comprised by the family Pichiaceae, all other lineages were

monophyletic. Most interrelationships among yeast species were robust across the

two methods and data matrices. However, eight of the 93 internodes conflicted

between analyses or data sets, including the placements of: the clade defined by

species that have reassigned the CUG codon to encode serine, instead of leucine;

the clade defined by a whole genome duplication; and the species Ascoidea

rubescens These phylogenomic analyses provide a robust roadmap for future

comparative work across the yeast subphylum in the disciplines of taxonomy,

molecular genetics, evolutionary biology, ecology, and biotechnology. To further

this end, we have also provided a BLAST server to query the 86 Saccharomycotina

genomes, which can be found at http://y1000plus.org/blast.

Copyright © 2016 Shen et al.

DOI: 10.1534/g3.116.034744

PMCID: PMC5144963

PMID: 27672114

53. Sci Rep. 2016 Dec 6;6:38367. doi: 10.1038/srep38367.

Resistance gene identification from Larimichthys crocea with machine learning

techniques.

Cai Y(1,)(2), Liao Z(3), Ju Y(1), Liu J(4), Mao Y(2,)(5), Liu X(1,)(2).

Author information:

(1)School of Information Science and Technology, Xiamen University, Xiamen,

Fujian 361005, China. (2)State Key Laboratory of Large Yellow Croaker Breeding,

Ningde Fufa Fisheries Company Limited, Ningde, 352000, China. (3)Department of

Biochemistry and Molecular Biology, School of Basic Medical Sciences, Fujian

Medical University, Fuzhou, 350122, China. (4)School of Aerospace Engineering,

Xiamen University, Xiamen, Fujian 361005, China. (5)College of Ocean and Earth

Sciences, Xiamen University, Xiamen, 361102, China.

The research on resistance genes (R-gene) plays a vital role in bioinformatics as

it has the capability of coping with adverse changes in the external environment,

which can form the corresponding resistance protein by transcription and

translation. It is meaningful to identify and predict R-gene of Larimichthys

crocea (L.Crocea). It is friendly for breeding and the marine environment as

well. Large amounts of L.Crocea's immune mechanisms have been explored by

biological methods. However, much about them is still unclear. In order to break

the limited understanding of the L.Crocea's immune mechanisms and to detect new

R-gene and R-gene-like genes, this paper came up with a more useful combination

prediction method, which is to extract and classify the feature of available

genomic data by machine learning. The effectiveness of feature extraction and

classification methods to identify potential novel R-gene was evaluated, and

different statistical analyzes were utilized to explore the reliability of

prediction method, which can help us further understand the immune mechanisms of

L.Crocea against pathogens. In this paper, a webserver called LCRG-Pred is

available at http://server.malab.cn/rg_lc/.

DOI: 10.1038/srep38367

PMCID: PMC5138596

PMID: 27922074

54. J Proteome Res. 2016 Dec 2;15(12):4755-4762. Epub 2016 Nov 3.

Ensemble Linear Neighborhood Propagation for Predicting Subchloroplast

Localization of Multi-Location Proteins.

Wan S(1), Mak MW(1), Kung SY(2).

Author information:

(1)Department of Electronic and Information Engineering, The Hong Kong

Polytechnic University , Hong Kong SAR, China. (2)Department of Electrical

Engineering, Princeton University , New Jersey 08540, United States.

In the postgenomic era, the number of unreviewed protein sequences is remarkably

larger and grows tremendously faster than that of reviewed ones. However,

existing methods for protein subchloroplast localization often ignore the

information from these unlabeled proteins. This paper proposes a multi-label

predictor based on ensemble linear neighborhood propagation (LNP), namely,

LNP-Chlo, which leverages hybrid sequence-based feature information from both

labeled and unlabeled proteins for predicting localization of both single- and

multi-label chloroplast proteins. Experimental results on a stringent benchmark

dataset and a novel independent dataset suggest that LNP-Chlo performs at least

6% (absolute) better than state-of-the-art predictors. This paper also

demonstrates that ensemble LNP significantly outperforms LNP based on individual

features. For readers' convenience, the online Web server LNP-Chlo is freely

available at http://bioinfo.eie.polyu.edu.hk/LNPChloServer/ .

DOI: 10.1021/acs.jproteome.6b00686

PMID: 27766879

55. Sci Rep. 2016 Dec 2;6:38318. doi: 10.1038/srep38318.

Mal-Lys: prediction of lysine malonylation sites in proteins integrated

sequence-based features with mRMR feature selection.

Xu Y(1), Ding YX(1), Ding J(1), Wu LY(2), Xue Y(3).

Author information:

(1)Department of Information and Computer Science, University of Science and

Technology Beijing, Beijing 100083, China. (2)Institute of Applied Mathematics,

Academy of Mathematics and Systems Science, Chinese Academy of Sciences, Beijing

100190, China. (3)Department of Biomedical Engineering, College of Life Science

and Technology, Huazhong University of Science and Technology, Wuhan, Hubei

430074, China.

Lysine malonylation is an important post-translational modification (PTM) in

proteins, and has been characterized to be associated with diseases. However,

identifying malonyllysine sites still remains to be a great challenge due to the

labor-intensive and time-consuming experiments. In view of this situation, the

establishment of a useful computational method and the development of an

efficient predictor are highly desired. In this study, a predictor Mal-Lys which

incorporated residue sequence order information, position-specific amino acid

propensity and physicochemical properties was proposed. A feature selection

method of minimum Redundancy Maximum Relevance (mRMR) was used to select optimal

ones from the whole features. With the leave-one-out validation, the value of the

area under the curve (AUC) was calculated as 0.8143, whereas 6-, 8- and 10-fold

cross-validations had similar AUC values which showed the robustness of the

predictor Mal-Lys. The predictor also showed satisfying performance in the

experimental data from the UniProt database. Meanwhile, a user-friendly

web-server for Mal-Lys is accessible at http://app.aporc.org/Mal-Lys/.

DOI: 10.1038/srep38318

PMCID: PMC5133563

PMID: 27910954

56. Bioinformatics. 2016 Dec 1;32(23):3584-3592. Epub 2016 Aug 11.

ChemTreeMap: an interactive map of biochemical similarity in molecular datasets.

Lu J(1), Carlson HA(1,)(2).

Author information:

(1)Department of Computational Medicine and Bioinformatics. (2)Department of

Medicinal Chemistry, University of Michigan, Ann Arbor, MI, USA.

MOTIVATION: What if you could explain complex chemistry in a simple tree and

share that data online with your collaborators? Computational biology often

incorporates diverse chemical data to probe a biological question, but the

existing tools for chemical data are ill-suited for the very large datasets

inherent to bioinformatics. Furthermore, existing visualization methods often

require an expert chemist to interpret the patterns. Biologists need an

interactive tool for visualizing chemical information in an intuitive, accessible

way that facilitates its integration into today's team-based biological research.

RESULTS: ChemTreeMap is an interactive, bioinformatics tool designed to explore

chemical space and mine the relationships between chemical structure, molecular

properties, and biological activity. ChemTreeMap synergistically combines

extended connectivity fingerprints and a neighbor-joining algorithm to produce a

hierarchical tree with branch lengths proportional to molecular similarity.

Compound properties are shown by leaf color, size and outline to yield a

user-defined visualization of the tree. Two representative analyses are included

to demonstrate ChemTreeMap's capabilities and utility: assessing dataset overlap

and mining structure-activity relationships.

AVAILABILITY AND IMPLEMENTATION: The examples from this paper may be accessed at

http://ajing.github.io/ChemTreeMap/ Code for the server and client are available

in the Supplementary Information, at the aforementioned github site, and on

Docker Hub (https://hub.docker.com) with the nametag ajing/chemtreemap.

CONTACT: carlsonh@umich.eduSupplementary information: Supplementary data are

available at Bioinformatics online.

© The Author 2016. Published by Oxford University Press. All rights reserved. For

Permissions, please e-mail: journals.permissions@oup.com.

DOI: 10.1093/bioinformatics/btw523

PMCID: PMC5181537 [Available on 2017-12-01]

PMID: 27515740

57. Bioinformatics. 2016 Dec 1;32(23):3676-3678. Epub 2016 Aug 8.

PRODIGY: a web server for predicting the binding affinity of protein-protein

complexes.

Xue LC(1), Rodrigues JP(1), Kastritis PL(1), Bonvin AM(1), Vangone A(1).

Author information:

(1)Computational Structural Biology Group, Bijvoet Center for Biomolecular

Research, Faculty of Science - Department of Chemistry, Utrecht University,

3584CH Utrecht, The Netherlands.

Gaining insights into the structural determinants of protein-protein interactions

holds the key for a deeper understanding of biological functions, diseases and

development of therapeutics. An important aspect of this is the ability to

accurately predict the binding strength for a given protein-protein complex. Here

we present PROtein binDIng enerGY prediction (PRODIGY), a web server to predict

the binding affinity of protein-protein complexes from their 3D structure. The

PRODIGY server implements our simple but highly effective predictive model based

on intermolecular contacts and properties derived from non-interface

surface.AVAILABILITY AND IMPLEMENTATION: PRODIGY is freely available at:

http://milou.science.uu.nl/services/PRODIGY CONTACT: a.m.j.j.bonvin@uu.nl,

a.vangone@uu.nl.

© The Author 2016. Published by Oxford University Press. All rights reserved. For

Permissions, please e-mail: journals.permissions@oup.com.

DOI: 10.1093/bioinformatics/btw514

PMID: 27503228

58. Bioinformatics. 2016 Dec 1;32(23):3673-3675. Epub 2016 Aug 6.

WebSTAR3D: a web server for RNA 3D structural alignment.

Holzhauser E(1), Ge P(1), Zhang S(1).

Author information:

(1)Department of Computer Science, University of Central Florida, Orlando, FL

32816, USA.

The WebSTAR3D web server is a user-friendly online interface for the alignment of

RNA 3D structures. The website takes as input two files, each of which can be in

either PDB or mmCIF format, containing the desired structures to align, via a PDB

code or user upload. In return, the user is presented with a visualization of the

aligned structures in Jmol or JSmol, along with the corresponding sequence

alignment, and the option to download the nucleotide mapping of the structures

and a PDB file containing the aligned, superimposed structures.AVAILABILITY AND

IMPLEMENTATION: The WebSTAR3D is available at http://rna.ucf.edu/WebSTAR3D

CONTACT: shzhang@cs.ucf.edu.

© The Author 2016. Published by Oxford University Press. All rights reserved. For

Permissions, please e-mail: journals.permissions@oup.com.

DOI: 10.1093/bioinformatics/btw502

PMCID: PMC5181533 [Available on 2017-12-01]

PMID: 27497443

59. Comput Biol Med. 2016 Dec 1;79:30-35. doi: 10.1016/j.compbiomed.2016.10.003. Epub

2016 Oct 4.

Computational identification of non-synonymous polymorphisms within regions

corresponding to protein interaction sites.

Skrlj B(1), Kunej T(2).

Author information:

(1)Department of Animal Science, Biotechnical Faculty, University of Ljubljana,

Groblje 3, Slovenia. Electronic address: skrljblaz@gmail.com. (2)Department of

Animal Science, Biotechnical Faculty, University of Ljubljana, Groblje 3,

Slovenia. Electronic address: tanja.kunej@bf.uni-lj.si.

BACKGROUND: Protein-protein interactions (PPI) play an important role in function

of all organisms and enable understanding of underlying metabolic processes.

Computational predictions of PPIs are an important aspect in proteomics, as

experimental methods may result in high degree of false positive results and are

more expensive. Although there are many databases collecting predicted PPIs,

exploration of genetics information underlying PPI interactions has not been

investigated thoroughly. The aim of the present study was to identify genomic

locations corresponding to regions involved in predicted PPIs and to collect

non-synonymous polymorphisms (nsSNPs) located within those regions; which we

termed PPI-SNPs.

METHODS: Predicted PPIs were obtained from PiSITE database

(http://pisite.hgc.jp). Non-synonymous SNPs mapped on protein structural data

(PDBs) were obtained from the UCSC server. Polymorphism locations on protein

structures were mapped to predicted PPI regions. DAVID tool was used for pathway

enrichment and gene cluster analysis (https://david.ncifcrf.gov/).

RESULTS: We collected 544 polymorphisms located within predicted PPI sites that

map to 197 genes. We identified 9 SNPs, previously associated with diseases, but

not yet associated with PPI sites. We also found examples in which polymorphisms

located within predicted PPI regions are also occurring within previously

experimentally validated PPIs and within experimentally determined functional

domains.

CONCLUSIONS: Our study provides the first catalog of nsSNPs located within

predicted PPIs. These prioritized SNPs present the basis for planning

experimental validation of SNPs that cause gain or loss of PPIs. Our

implementation is expandable, as datasets used are constantly updated.

Copyright © 2016 Elsevier Ltd. All rights reserved.

DOI: 10.1016/j.compbiomed.2016.10.003

PMID: 27744178

60. J Struct Funct Genomics. 2016 Dec;17(4):83-99. doi: 10.1007/s10969-016-9208-y.

Epub 2016 Aug 13.

HOMCOS: an updated server to search and model complex 3D structures.

Kawabata T(1).

Author information:

(1)Institute for Protein Research, Osaka University, 3-2 Yamadaoka, Suita, Osaka,

565-0871, Japan. kawabata@protein.osaka-u.ac.jp.

The HOMCOS server ( http://homcos.pdbj.org ) was updated for both searching and

modeling the 3D complexes for all molecules in the PDB. As compared to the

previous HOMCOS server, the current server targets all of the molecules in the

PDB including proteins, nucleic acids, small compounds and metal ions. Their

binding relationships are stored in the database. Five services are available for

users. For the services "Modeling a Homo Protein Multimer" and "Modeling a Hetero

Protein Multimer", a user can input one or two proteins as the queries, while for

the service "Protein-Compound Complex", a user can input one chemical compound

and one protein. The server searches similar molecules by BLAST and KCOMBU. Based

on each similar complex found, a simple sequence-replaced model is quickly

generated by replacing the residue names and numbers with those of the query

protein. A target compound is flexibly superimposed onto the template compound

using the program fkcombu. If monomeric 3D structures are input as the query,

then template-based docking can be performed. For the service "Searching Contact

Molecules for a Query Protein", a user inputs one protein sequence as the query,

and then the server searches for its homologous proteins in PDB and summarizes

their contacting molecules as the predicted contacting molecules. The results are

summarized in "Summary Bars" or "Site Table"display. The latter shows the results

as a one-site-one-row table, which is useful for annotating the effects of

mutations. The service "Searching Contact Molecules for a Query Compound" is also

available.

DOI: 10.1007/s10969-016-9208-y

PMCID: PMC5274653

PMID: 27522608

61. Mar Genomics. 2016 Dec;30:67-71. doi: 10.1016/j.margen.2016.10.004. Epub 2016 Oct

11.

Having a BLAST: Searchable transcriptome resources for the gilthead sea bream and

the European sea bass.

Louro B(1), Marques JP(2), Power DM(3), Canário AV(3).

Author information:

(1)Centro de Ciências do Mar, Universidade do Algarve, Campus de Gambelas,

8005-139 Faro, Portugal. Electronic address: blouro@ualg.pt. (2)CIBIO, Centro de

Investigação em Biodiversidade e Recursos Genéticos, InBIO, Laboratório

Associado, Universidade do Porto. Campus Agrário de Vairão, 4485-661 Vairão,

Portugal. (3)Centro de Ciências do Mar, Universidade do Algarve, Campus de

Gambelas, 8005-139 Faro, Portugal.

The gilthead sea bream (Sparus aurata) and the European sea bass (Dicentrarchus

labrax) are the most important aquaculture species in the Mediterranean Sea and

since the last decade it has been seen an exponential increase in their available

molecular resources. In order to improve accessibility to transcriptome

resources, Expressed Sequence Tags (ESTs), mRNA sequences and raw read sequences

were assembled and deposited in BLAST queryable databases. The publicly available

sea bream and sea bass sequences (6.4 and 247.5 million) generated 45,094 and

68,117 assembled sequences, with, respectively, arithmetic mean size of 998 and

2125bp and N50 of 1302 and 2966bp. The assemblies will be regularly updated and

new analytical tools added to the web server at http://sea.ccmar.ualg.pt.

Copyright © 2016 Elsevier B.V. All rights reserved.

DOI: 10.1016/j.margen.2016.10.004

PMID: 27742405

62. Mol Genet Genomics. 2016 Dec;291(6):2225-2229. Epub 2016 Sep 2.

Identifying N (6)-methyladenosine sites in the Arabidopsis thaliana

transcriptome.

Chen W(1), Feng P(2), Ding H(3), Lin H(4).

Author information:

(1)Department of Physics, School of Sciences, and Center for Genomics and

Computational Biology, North China University of Science and Technology,

Tangshan, 063000, China. chenweiimu@gmail.com. (2)School of Public Health, North

China University of Science and Technology, Tangshan, 063000, China. (3)Key

Laboratory for Neuro-Information of Ministry of Education, Center of

Bioinformatics and Center for Information in Biomedicine, School of Life Science

and Technology, University of Electronic Science and Technology of China,

Chengdu, 610054, China. (4)Key Laboratory for Neuro-Information of Ministry of

Education, Center of Bioinformatics and Center for Information in Biomedicine,

School of Life Science and Technology, University of Electronic Science and

Technology of China, Chengdu, 610054, China. hlin@uestc.edu.cn.

N (6)-Methyladenosine (m(6)A) plays important roles in many biological processes.

The knowledge of the distribution of m(6)A is helpful for understanding its

regulatory roles. Although the experimental methods have been proposed to detect

m(6)A, the resolutions of these methods are still unsatisfying especially for

Arabidopsis thaliana. Benefitting from the experimental data, in the current

work, a support vector machine-based method was proposed to identify m(6)A sites

in A. thaliana transcriptome. The proposed method was validated on a benchmark

dataset using jackknife test and was also validated by identifying

strain-specific m(6)A sites in A. thaliana. The obtained predictive results

indicate that the proposed method is quite promising. For the convenience of

experimental biologists, an online webserver for the proposed method was built,

which is freely available at http://lin.uestc.edu.cn/server/M6ATH . These results

indicate that the proposed method holds a potential to become an elegant tool in

identifying m(6)A site in A. thaliana.

DOI: 10.1007/s00438-016-1243-7

PMID: 27590733 [Indexed for MEDLINE]

63. Nat Protoc. 2016 Dec;11(12):2529-2548. doi: 10.1038/nprot.2016.150. Epub 2016 Nov

17.

Indel variant analysis of short-read sequencing data with Scalpel.

Fang H(1,)(2,)(3), Bergmann EA(4), Arora K(4), Vacic V(4), Zody MC(4), Iossifov

I(1), O'Rawe JA(2,)(3), Wu Y(2,)(3), Jimenez Barron LT(2,)(5), Rosenbaum J(1),

Ronemus M(1), Lee YH(1), Wang Z(1), Dikoglu E(2), Jobanputra V(2,)(6), Lyon

GJ(2,)(3), Wigler M(1), Schatz MC(1,)(7), Narzisi G(1,)(4).

Author information:

(1)Simons Center for Quantitative Biology, Cold Spring Harbor Laboratory, Cold

Spring Harbor, New York, USA. (2)Stanley Institute for Cognitive Genomics, Cold

Spring Harbor Laboratory, Cold Spring Harbor, New York, USA. (3)Stony Brook

University, Stony Brook, New York, USA. (4)New York Genome Center, New York, New

York, USA. (5)Centro de Ciencias Genomicas, Universidad Nacional Autonoma de

Mexico, Cuernavaca, Mexico. (6)Columbia University Medical Center, New York, New

York, USA. (7)Department of Computer Science, Johns Hopkins University,

Baltimore, Maryland, USA.

As the second most common type of variation in the human genome, insertions and

deletions (indels) have been linked to many diseases, but the discovery of indels

of more than a few bases in size from short-read sequencing data remains

challenging. Scalpel (http://scalpel.sourceforge.net) is an open-source software

for reliable indel detection based on the microassembly technique. It has been

successfully used to discover mutations in novel candidate genes for autism, and

it is extensively used in other large-scale studies of human diseases. This

protocol gives an overview of the algorithm and describes how to use Scalpel to

perform highly accurate indel calling from whole-genome and whole-exome

sequencing data. We provide detailed instructions for an exemplary family-based

de novo study, but we also characterize the other two supported modes of

operation: single-sample and somatic analysis. Indel normalization, visualization

and annotation of the mutations are also illustrated. Using a standard server,

indel discovery and characterization in the exonic regions of the example

sequencing data can be completed in ∼5 h after read mapping.

DOI: 10.1038/nprot.2016.150

PMID: 27854363

64. PLoS One. 2016 Dec 1;11(12):e0167345. doi: 10.1371/journal.pone.0167345.

eCollection 2016.

DNABP: Identification of DNA-Binding Proteins Based on Feature Selection Using a

Random Forest and Predicting Binding Residues.

Ma X(1), Guo J(2), Sun X(2).

Author information:

(1)School of Science, Nanjing Audit University, Nanjing, China. (2)State Key

Laboratory of Bioelectronics, School of Biological Science and Medical

Engineering, Southeast University, Nanjing, China.

DNA-binding proteins are fundamentally important in cellular processes. Several

computational-based methods have been developed to improve the prediction of

DNA-binding proteins in previous years. However, insufficient work has been done

on the prediction of DNA-binding proteins from protein sequence information. In

this paper, a novel predictor, DNABP (DNA-binding proteins), was designed to

predict DNA-binding proteins using the random forest (RF) classifier with a

hybrid feature. The hybrid feature contains two types of novel sequence features,

which reflect information about the conservation of physicochemical properties of

the amino acids, and the binding propensity of DNA-binding residues and

non-binding propensities of non-binding residues. The comparisons with each

feature demonstrated that these two novel features contributed most to the

improvement in predictive ability. Furthermore, to improve the prediction

performance of the DNABP model, feature selection using the minimum redundancy

maximum relevance (mRMR) method combined with incremental feature selection (IFS)

was carried out during the model construction. The results showed that the DNABP

model could achieve 86.90% accuracy, 83.76% sensitivity, 90.03% specificity and a

Matthews correlation coefficient of 0.727. High prediction accuracy and

performance comparisons with previous research suggested that DNABP could be a

useful approach to identify DNA-binding proteins from sequence information. The

DNABP web server system is freely available at http://www.cbi.seu.edu.cn/DNABP/.

DOI: 10.1371/journal.pone.0167345

PMCID: PMC5132331

PMID: 27907159

Conflict of interest statement: The authors have declared that no competing

interests exist.

65. Schweiz Arch Tierheilkd. 2016 Dec;158(12):805-810.

[AntibioticScout: Online tool for antimicrobial stewardship in veterinary

medicine].

[Article in German; Abstract available in German from the publisher]

Peter R(1), Müntener C(1), Demuth D(1), Heim D(2), Mevissen M(3),

Schüpbach-Regula G(4), Schuller S(5), Stucki F(2), Willi B(6), Naegeli H(1).

Author information:

(1)Institut für Veterinärpharmakologie und -toxikologie der Universität Zürich.

(2)Bundesamt für Lebensmittelsicherheit und Veterinärwesen BLV, Bern.

(3)Abteilung für Veteinärpharmakologie und -toxikologie der Universität Bern.

(4)Veterinary Public Health Institute (VPHI), Universität Bern. (5)Klinik für

Kleintiermedizin der Universität Bern. (6)Klinik für Kleintiermedizin der

Universität Zürich.

INTRODUCTION: Resistances to antimicrobials pose serious public health

challenges. This issue concerns both human and veterinary medicine and can only

be solved by a multidisciplinary approach. A comprehensive concept is, therefore,

being worked out within the StAR (strategy antibiotic resistance) program in

order to preserve the effectiveness of antibiotics for humans as well as animals.

In this context, the AntibioticScout (www.AntibioticScout. ch) offers a new

online tool for the prudent use of antibiotics in veterinary medicine. By

involving all stakeholders, the guidelines included in the AntibioticScout will

result in a nationwide accepted standard for the treatment of bacterial

infections in animals. An additional system for the rapid reporting of cases of

suspected lack of efficacy of antimicrobials is integrated to allow early

detection of emerging resistance and the immediate launch of risk mitigation

measures. A first version of the AntibioticScout for the treatment of dogs, cats

and horses is available by the end of 2016. All stakeholders are now invited to

contribute to the development of the AntibioticScout decision support.

Publisher: Resistenzen gegenüber antimikrobiellen Wirkstoffen stellen das

Gesundheitssystem vor grosse Herausforderungen. Dieses Problem betrifft die

Human- wie die Veterinärmedizin und kann nur bereichsübergreifend gelöst werden.

Deshalb wird mit dem StAR (Strategie Antibiotikaresistenzen)-Programm ein

umfassendes Gesamtkonzept ausgearbeitet, um die Wirksamkeit von Antibiotika für

Mensch und Tier langfristig zu erhalten. In diesem Zusammenhang bieten wir mit

der Entwicklung des AntibioticScout (www.AntibioticScout.ch) ein neues

Online-Instrument an, um den verantwortungsvollen Einsatz von Antibiotika in der

Veterinärmedizin zu unterstützen. Unter Einbezug aller Interessenvertreter sollen

Leitlinien zu einem national akzeptierten Standard zur Therapie von bakteriellen

Infektionen bei Tieren erarbeitet und im AntibioticScout aufgeführt werden.

Darüber hinaus wird ein Sofortsystem zur Meldung von Unwirksamkeiten angeboten,

um Risiken frühzeitig zu erkennen und entsprechende Massnahmen zu ergreifen. Eine

erste Fassung des AntibioticScout für die Behandlung von Hunden, Katzen und

Pferden ist ab Ende 2016 verfügbar. Alle Interessenvertreter sind nun eingeladen,

sich am Aufbau des AntibioticScout zu beteiligen.Publisher: Les résistances face

aux substances antimicrobiennes placent le système de santé face à de grands

défis. Ce problème touche aussi bien la médecine humaine que vétérinaire et ne

peut être réglé que de façon transversale. C’est pour cette raison qu’a été

développé, avec le programme StAR (Strategie Antibiotikaresistenzen), un concept

global pour assurer à long terme l’efficacité des antibiotiques aussi bien chez

les hommes que chez les animaux. Dans ce contexte, nous mettons à disposition,

avec le développement d’AntibioticScout (www.AntibioticScout. ch), un nouvel

outil en ligne pour soutenir un usage responsable des antibiotiques en médecine

vétérinaire. Avec le concours de représentants de tous les milieux intéressés, il

s’agit de développer les lignes directrices d’un standard accepté au plan

national pour le traitement des infections bactériennes chez les animaux et de le

mettre à disposition dans AntibioticScout. En outre un système d’annonce

immédiate en cas d’inefficacité sera mis en place, afin de repérer précocement

les risques et de prendre les mesures correspondantes. Une première version

d’AntibioticScout pour le traitement des chiens, chats et chevaux est disponible

dès fin 2016. Tous les cercles intéressés sont dès maintenant invités à

contribuer au développement d’Antibiotic Scout.Publisher: Il sistema sanitario è

messo a dura prova dalla resistenza agli agenti antimicrobici. Questo problema

riguarda sia la medicina umana che quella veterinaria e può essere risolto solo

in modo trasversale. Pertanto, è stato redatto sotto il nome di programma StAR

(strategia contro la resistenza agli antibiotici) un approccio integrato per

preservare l’efficacia degli antibiotici per l’uomo e per gli animali sul lungo

termine. In questo contesto, con lo sviluppo di AntibioticScout

(www.AntibioticScout. ch) proponiamo un nuovo strumento online per sostenere

l’uso responsabile degli antibiotici in medicina veterinaria. Con il sostegno di

tutte le parti interessate saranno sviluppate delle linee guida, con uno standard

riconosciuto a livello nazionale, per il trattamento delle infezioni batteriche

negli animali. Queste saranno inserite in AntibioticScout. Inoltre, alfine di

identificare in anticipo i rischi e di prendere le misure necessarie, verrà

offerto un sistema istantaneo per riportare le inefficienze. Una versione

iniziale di AntibioticScout per il trattamento di cani, gatti e cavalli sarà

disponibile a partire dalla fine del 2016. Tutte le parti interessate sono

invitate a partecipare alla realizzazione di Antibiotic- Scout.

DOI: 10.17236/sat00095

PMID: 27934622

66. PLoS One. 2016 Nov 28;11(11):e0166965. doi: 10.1371/journal.pone.0166965.

eCollection 2016.

Evolutionary Algorithm for RNA Secondary Structure Prediction Based on Simulated

SHAPE Data.

Montaseri S(1), Ganjtabesh M(1), Zare-Mirakabad F(2).

Author information:

(1)Department of Computer Science, School of Mathematics, Statistics, and

Computer Science, University of Tehran, Tehran, Iran. (2)Department of Computer

Science, Faculty of Mathematics and Computer Science, Amirkabir University of

Technology, Tehran, Iran.

BACKGROUND: Non-coding RNAs perform a wide range of functions inside the living

cells that are related to their structures. Several algorithms have been proposed

to predict RNA secondary structure based on minimum free energy. Low prediction

accuracy of these algorithms indicates that free energy alone is not sufficient

to predict the functional secondary structure. Recently, the obtained information

from the SHAPE experiment greatly improves the accuracy of RNA secondary

structure prediction by adding this information to the thermodynamic free energy

as pseudo-free energy.

METHOD: In this paper, a new method is proposed to predict RNA secondary

structure based on both free energy and SHAPE pseudo-free energy. For each RNA

sequence, a population of secondary structures is constructed and their SHAPE

data are simulated. Then, an evolutionary algorithm is used to improve each

structure based on both free and pseudo-free energies. Finally, a structure with

minimum summation of free and pseudo-free energies is considered as the predicted

RNA secondary structure.

RESULTS AND CONCLUSIONS: Computationally simulating the SHAPE data for a given

RNA sequence requires its secondary structure. Here, we overcome this limitation

by employing a population of secondary structures. This helps us to simulate the

SHAPE data for any RNA sequence and consequently improves the accuracy of RNA

secondary structure prediction as it is confirmed by our experiments. The source

code and web server of our proposed method are freely available at

http://mostafa.ut.ac.ir/ESD-Fold/.

DOI: 10.1371/journal.pone.0166965

PMCID: PMC5125645

PMID: 27893832

Conflict of interest statement: The authors have declared that no competing

interests exist.

67. BMC Genomics. 2016 Nov 18;17(1):938.

The ChIP-Seq tools and web server: a resource for analyzing ChIP-seq and other

types of genomic data.

Ambrosini G(1,)(2), Dreos R(1,)(2), Kumar S(1,)(2), Bucher P(3,)(4).

Author information:

(1)School of Life Sciences, Ecole Polytechnique Fédérale de Lausanne (EPFL),

CH-1015, Lausanne, Switzerland. (2)Swiss Institute of Bioinformatics (SIB),

CH-1015, Lausanne, Switzerland. (3)School of Life Sciences, Ecole Polytechnique

Fédérale de Lausanne (EPFL), CH-1015, Lausanne, Switzerland.

philipp.bucher@epfl.ch. (4)Swiss Institute of Bioinformatics (SIB), CH-1015,

Lausanne, Switzerland. philipp.bucher@epfl.ch.

BACKGROUND: ChIP-seq and related high-throughput chromatin profilig assays

generate ever increasing volumes of highly valuable biological data. To make

sense out of it, biologists need versatile, efficient and user-friendly tools for

access, visualization and itegrative analysis of such data.

RESULTS: Here we present the ChIP-Seq command line tools and web server,

implementing basic algorithms for ChIP-seq data analysis starting with a read

alignment file. The tools are optimized for memory-efficiency and speed thus

allowing for processing of large data volumes on inexpensive hardware. The web

interface provides access to a large database of public data. The ChIP-Seq tools

have a modular and interoperable design in that the output from one application

can serve as input to another one. Complex and innovative tasks can thus be

achieved by running several tools in a cascade.

CONCLUSIONS: The various ChIP-Seq command line tools and web services either

complement or compare favorably to related bioinformatics resources in terms of

computational efficiency, ease of access to public data and interoperability with

other web-based tools. The ChIP-Seq server is accessible at

http://ccg.vital-it.ch/chipseq/ .

DOI: 10.1186/s12864-016-3288-8

PMCID: PMC5116162

PMID: 27863463

68. BMC Genomics. 2016 Nov 16;17(1):931.

AnnoLnc: a web server for systematically annotating novel human lncRNAs.

Hou M(1), Tang X(1,)(2), Tian F(1,)(3), Shi F(1), Liu F(1), Gao G(4).

Author information:

(1)State Key Laboratory of Protein and Plant Gene Research, College of Life

Sciences, Center for Bioinformatics, Peking University, Beijing, 100871, P.R.

China. (2)Present address: Department of Hematology, St. Jude Children's Research

Hospital, Memphis, TN, USA. (3)Peking-Tsinghua Center for Life Sciences, Academy

for Advanced Interdisciplinary Studies, Peking University, Beijing, 100871, P.R.

China. (4)State Key Laboratory of Protein and Plant Gene Research, College of

Life Sciences, Center for Bioinformatics, Peking University, Beijing, 100871,

P.R. China. gaog@mail.cbi.pku.edu.cn.

BACKGROUND: Long noncoding RNAs (lncRNAs) have been shown to play essential roles

in almost every important biological process through multiple mechanisms.

Although the repertoire of human lncRNAs has rapidly expanded, their biological

function and regulation remain largely elusive, calling for a systematic and

integrative annotation tool.

RESULTS: Here we present AnnoLnc ( http://annolnc.cbi.pku.edu.cn ), a one-stop

portal for systematically annotating novel human lncRNAs. Based on more than 700

data sources and various tool chains, AnnoLnc enables a systematic annotation

covering genomic location, secondary structure, expression patterns,

transcriptional regulation, miRNA interaction, protein interaction, genetic

association and evolution. An intuitive web interface is available for

interactive analysis through both desktops and mobile devices, and programmers

can further integrate AnnoLnc into their pipeline through standard JSON-based Web

Service APIs.

CONCLUSIONS: To the best of our knowledge, AnnoLnc is the only web server to

provide on-the-fly and systematic annotation for newly identified human lncRNAs.

Compared with similar tools, the annotation generated by AnnoLnc covers a much

wider spectrum with intuitive visualization. Case studies demonstrate the power

of AnnoLnc in not only rediscovering known functions of human lncRNAs but also

inspiring novel hypotheses.

DOI: 10.1186/s12864-016-3287-9

PMCID: PMC5112684

PMID: 27852242

69. Bioinformatics. 2016 Nov 15;32(22):3489-3491. Epub 2016 Aug 2.

NET-GE: a web-server for NETwork-based human gene enrichment.

Bovo S(1), Di Lena P(2), Martelli PL(1), Fariselli P(3), Casadio R(1,)(4).

Author information:

(1)Biocomputing Group, CIG, Interdepartmental Center «Luigi Galvani» for

Integrated Studies of Bioinformatics, Biophysics and Biocomplexity, University of

Bologna, Bologna, Italy. (2)DISI, University of Bologna, Bologna, Italy. (3)BCA,

University of Padova, Padova, Italy. (4)Interdepartmental Center «Giorgio Prodi»

for Cancer Research, University of Bologna, Bologna, Italy.

MOTIVATION: Gene enrichment is a requisite for the interpretation of biological

complexity related to specific molecular pathways and biological processes.

Furthermore, when interpreting NGS data and human variations, including those

related to pathologies, gene enrichment allows the inclusion of other genes that

in the human interactome space may also play important key roles in the emergency

of the phenotype. Here, we describe NET-GE, a web server for associating

biological processes and pathways to sets of human proteins involved in the same

phenotype RESULTS: NET-GE is based on protein-protein interaction networks,

following the notion that for a set of proteins, the context of their specific

interactions can better define their function and the processes they can be

related to in the biological complexity of the cell. Our method is suited to

extract statistically validated enriched terms from Gene Ontology, KEGG and

REACTOME annotation databases. Furthermore, NET-GE is effective even when the

number of input proteins is small.

AVAILABILITY AND IMPLEMENTATION: NET-GE web server is publicly available and

accessible at http://net-ge.biocomp.unibo.it/enrich CONTACT:

gigi@biocomp.unibo.itSupplementary information: Supplementary data are available

at Bioinformatics online.

© The Author 2016. Published by Oxford University Press. All rights reserved. For

Permissions, please e-mail: journals.permissions@oup.com.

DOI: 10.1093/bioinformatics/btw508

PMID: 27485441

70. PLoS One. 2016 Nov 11;11(11):e0166126. doi: 10.1371/journal.pone.0166126.

eCollection 2016.

Vidjil: A Web Platform for Analysis of High-Throughput Repertoire Sequencing.

Duez M(1,)(2), Giraud M(3,)(4), Herbert R(3,)(4), Rocher T(3,)(4), Salson

M(3,)(4), Thonier F(5).

Author information:

(1)School of Social and Community Medicine, University of Bristol, Bristol,

United Kingdom. (2)SIRIC ONCOLille, 59000 Lille, France. (3)Université de Lille,

CNRS, UMR 9189 - CRIStAL - Centre de Recherche en Informatique Signal et

Automatique de Lille, 59000 Lille, France. (4)Inria Lille, 59650 Villeneuve

d'Ascq, France. (5)Inserm UMR1151, Institut Necker-Enfants Malades, Paris

Descartes University and Necker–Enfants Malades Hospital–Paris, France.

Erratum in

PLoS One. 2017 Feb 9;12 (2):e0172249.

BACKGROUND: The B and T lymphocytes are white blood cells playing a key role in

the adaptive immunity. A part of their DNA, called the V(D)J recombinations, is

specific to each lymphocyte, and enables recognition of specific antigenes.

Today, with new sequencing techniques, one can get billions of DNA sequences from

these regions. With dedicated Repertoire Sequencing (RepSeq) methods, it is now

possible to picture population of lymphocytes, and to monitor more accurately the

immune response as well as pathologies such as leukemia.

METHODS AND RESULTS: Vidjil is an open-source platform for the interactive

analysis of high-throughput sequencing data from lymphocyte recombinations. It

contains an algorithm gathering reads into clonotypes according to their V(D)J

junctions, a web application made of a sample, experiment and patient database

and a visualization for the analysis of clonotypes along the time. Vidjil is

implemented in C++, Python and Javascript and licensed under the GPLv3

open-source license. Source code, binaries and a public web server are available

at http://www.vidjil.org and at http://bioinfo.lille.inria.fr/vidjil. Using the

Vidjil web application consists of four steps: 1. uploading a raw sequence file

(typically a FASTQ); 2. running RepSeq analysis software; 3. visualizing the

results; 4. annotating the results and saving them for future use. For the

end-user, the Vidjil web application needs no specific installation and just

requires a connection and a modern web browser. Vidjil is used by labs in

hematology or immunology for research and clinical applications.

DOI: 10.1371/journal.pone.0166126

PMCID: PMC5106020

PMID: 27835690

Conflict of interest statement: The authors have declared that no competing

interests exist.

71. J Cheminform. 2016 Nov 4;8:61. eCollection 2016.

ClassyFire: automated chemical classification with a comprehensive, computable

taxonomy.

Djoumbou Feunang Y(1), Eisner R(2), Knox C(3), Chepelev L(4), Hastings J(5), Owen

G(5), Fahy E(6), Steinbeck C(5), Subramanian S(6), Bolton E(7), Greiner R(8),

Wishart DS(9).

Author information:

(1)Department of Biological Sciences, University of Alberta, Edmonton, AB T6G 2E8

Canada. (2)Jobber - Field Service Software, 10520 Jasper Ave, Edmonton, AB T5J

1Z7 Canada. (3)Department of Computing Science, University of Alberta, Edmonton,

AB T6G 2E8 Canada. (4)Department of Medical Imaging, The Ottawa Hospital,

University of Ottawa, Civic Campus, 1053 Carling Ave, Ottawa, ON K1Y 4E9 Canada.

(5)European Molecular Biology Laboratory - European Bioinformatics Institute

(EMBL-EBI), Wellcome Trust Genome Campus, Hinxton, Cambridge UK. (6)Department of

Bioengineering, University of California, La Jolla, San Diego, CA 92093 USA.

(7)Department of Health and Human Services, National Center for Biotechnology

Information, National Library of Medicine, National Institutes of Health, 8600

Rockville Pike, Bethesda, MD 20894 USA. (8)Department of Computing Science,

University of Alberta, Edmonton, AB T6G 2E8 Canada ; Department of Computing

Science 2-21 Athabasca Hall, Alberta Innovates Centre for Machine Learning

(AICML), University of Alberta, Edmonton, AB T6G 2E8 Canada. (9)Department of

Biological Sciences, University of Alberta, Edmonton, AB T6G 2E8 Canada ;

Department of Computing Science, University of Alberta, Edmonton, AB T6G 2E8

Canada ; National Research Council, National Institute for Nanotechnology (NINT),

Edmonton, AB T6G 2M9 Canada ; The Metabolomics Innovation Center, University of

Alberta, Edmonton, AB T6G 2E9 Canada.

BACKGROUND: Scientists have long been driven by the desire to describe, organize,

classify, and compare objects using taxonomies and/or ontologies. In contrast to

biology, geology, and many other scientific disciplines, the world of chemistry

still lacks a standardized chemical ontology or taxonomy. Several attempts at

chemical classification have been made; but they have mostly been limited to

either manual, or semi-automated proof-of-principle applications. This is

regrettable as comprehensive chemical classification and description tools could

not only improve our understanding of chemistry but also improve the linkage

between chemistry and many other fields. For instance, the chemical

classification of a compound could help predict its metabolic fate in humans, its

druggability or potential hazards associated with it, among others. However, the

sheer number (tens of millions of compounds) and complexity of chemical

structures is such that any manual classification effort would prove to be near

impossible.

RESULTS: We have developed a comprehensive, flexible, and computable, purely

structure-based chemical taxonomy (ChemOnt), along with a computer program

(ClassyFire) that uses only chemical structures and structural features to

automatically assign all known chemical compounds to a taxonomy consisting of

>4800 different categories. This new chemical taxonomy consists of up to 11

different levels (Kingdom, SuperClass, Class, SubClass, etc.) with each of the

categories defined by unambiguous, computable structural rules. Furthermore each

category is named using a consensus-based nomenclature and described (in English)

based on the characteristic common structural properties of the compounds it

contains. The ClassyFire webserver is freely accessible at

http://classyfire.wishartlab.com/. Moreover, a Ruby API version is available at

https://bitbucket.org/wishartlab/classyfire_api, which provides programmatic

access to the ClassyFire server and database. ClassyFire has been used to

annotate over 77 million compounds and has already been integrated into other

software packages to automatically generate textual descriptions for, and/or

infer biological properties of over 100,000 compounds. Additional examples and

applications are provided in this paper.

CONCLUSION: ClassyFire, in combination with ChemOnt (ClassyFire's comprehensive

chemical taxonomy), now allows chemists and cheminformaticians to perform

large-scale, rapid and automated chemical classification. Moreover, a freely

accessible API allows easy access to more than 77 million "ClassyFire" classified

compounds. The results can be used to help annotate well studied, as well as

lesser-known compounds. In addition, these chemical classifications can be used

as input for data integration, and many other cheminformatics-related tasks.

DOI: 10.1186/s13321-016-0174-y

PMCID: PMC5096306

PMID: 27867422

72. Sci Rep. 2016 Nov 2;6:35996. doi: 10.1038/srep35996.

DPDR-CPI, a server that predicts Drug Positioning and Drug Repositioning via

Chemical-Protein Interactome.

Luo H(1), Zhang P(2), Cao XH(3), Du D(1), Ye H(1), Huang H(1), Li C(1), Qin S(1),

Wan C(1), Shi L(4), He L(1), Yang L(1).

Author information:

(1)Bio-X Institutes, Shanghai Jiao Tong University, Shanghai 200030, China.

(2)Center for Computational Health, IBM T.J. Watson Research Center, Yorktown

Heights, NY 10598, USA. (3)Center for Data Analytics and Biomedical Informatics,

Temple University, Philadelphia, PA 19122, USA. (4)Collaborative Innovation

Center for Genetics and Development, State Key Laboratory of Genetic Engineering

and MOE Key Laboratory of Contemporary Anthropology, School of Life Sciences,

Fudan University, Shanghai 200438, China.

The cost of developing a new drug has increased sharply over the past years. To

ensure a reasonable return-on-investment, it is useful for drug discovery

researchers in both industry and academia to identify all the possible

indications for early pipeline molecules. For the first time, we propose the term

computational "drug candidate positioning" or "drug positioning", to describe the

above process. It is distinct from drug repositioning, which identifies new uses

for existing drugs and maximizes their value. Since many therapeutic effects are

mediated by unexpected drug-protein interactions, it is reasonable to analyze the

chemical-protein interactome (CPI) profiles to predict indications. Here we

introduce the server DPDR-CPI, which can make real-time predictions based only on

the structure of the small molecule. When a user submits a molecule, the server

will dock it across 611 human proteins, generating a CPI profile of features that

can be used for predictions. It can suggest the likelihood of relevance of the

input molecule towards ~1,000 human diseases with top predictions listed.

DPDR-CPI achieved an overall AUROC of 0.78 during 10-fold cross-validations and

AUROC of 0.76 for the independent validation. The server is freely accessible via

http://cpi.bio-x.cn/dpdr/.

DOI: 10.1038/srep35996

PMCID: PMC5090963

PMID: 27805045

Conflict of interest statement: Lun Yang is a current employee at Bayer Pharma AG

and Heng Luo is a current postdoctoral researcher at IBM. However, this study was

based on their previous work at Shanghai Jiao Tong University and Bayer Pharma AG

was not involved.

73. Anal Chem. 2016 Nov 1;88(21):10395-10403. Epub 2016 Oct 13.

Web Server for Peak Detection, Baseline Correction, and Alignment in

Two-Dimensional Gas Chromatography Mass Spectrometry-Based Metabolomics Data.

Tian TF(1,)(2), Wang SY(1,)(2), Kuo TC(2,)(3), Tan CE(1,)(2), Chen GY(2,)(4), Kuo

CH(2,)(4,)(5), Chen CS(6), Chan CC(6), Lin OA(3), Tseng YJ(1,)(2,)(4,)(3).

Author information:

(1)Department of Computer Science and Information Engineering, National Taiwan

University , No. 1, Sec. 4, Roosevelt Road, Taipei 10617, Taiwan. (2)The

Metabolomics Core Laboratory, Center of Genomic Medicine, National Taiwan

University , No. 2, Syu-Jhou Road, Taipei 10055, Taiwan. (3)Graduate Institute of

Biomedical Electronics and Bioinformatics, National Taiwan University , No. 1,

Sec. 4, Roosevelt Road, Taipei 10617, Taiwan. (4)School of Pharmacy, College of

Medicine, National Taiwan University , No. 33, Linsen S. Road, Taipei 100,

Taiwan. (5)Department of Pharmacy, National Taiwan University Hospital, National

Taiwan University , No. 1, Changde Street, Taipei 10048, Taiwan. (6)Institute of

Occupational Medicine and Industrial Hygiene, National Taiwan University , No.

17, Xuzhou Road, Taipei 100, Taiwan.

Two-dimensional gas chromatography time-of-flight mass spectrometry

(GC×GC/TOF-MS) is superior for chromatographic separation and provides great

sensitivity for complex biological fluid analysis in metabolomics. However,

GC×GC/TOF-MS data processing is currently limited to vendor software and

typically requires several preprocessing steps. In this work, we implement a

web-based platform, which we call GC(2)MS, to facilitate the application of

recent advances in GC×GC/TOF-MS, especially for metabolomics studies. The core

processing workflow of GC(2)MS consists of blob/peak detection, baseline

correction, and blob alignment. GC(2)MS treats GC×GC/TOF-MS data as pictures and

clusters the pixels as blobs according to the brightness of each pixel to

generate a blob table. GC(2)MS then aligns the blobs of two GC×GC/TOF-MS data

sets according to their distance and similarity. The blob distance and similarity

are the Euclidean distance of the first and second retention times of two blobs

and the Pearson's correlation coefficient of the two mass spectra, respectively.

GC(2)MS also directly corrects the raw data baseline. The analytical performance

of GC(2)MS was evaluated using GC×GC/TOF-MS data sets of Angelica sinensis

compounds acquired under different experimental conditions and of human plasma

samples. The results show that GC(2)MS is an easy-to-use tool for detecting peaks

and correcting baselines, and GC(2)MS is able to align GC×GC/TOF-MS data sets

acquired under different experimental conditions. GC(2)MS is freely accessible at

http://gc2ms.web.cmdm.tw .

DOI: 10.1021/acs.analchem.6b00755

PMID: 27673369

74. Bioinformatics. 2016 Nov 1;32(21):3330-3332. Epub 2016 Jul 4.

The SMAL web server: global multiple network alignment from pairwise alignments.

Dohrmann J(1), Singh R(2).

Author information:

(1)Department of Computer Science, San Francisco State University, San Francisco,

CA 94132, USA. (2)Department of Computer Science, San Francisco State University,

San Francisco, CA 94132, USA Center for Discovery and Innovation in Parasitic

Diseases, University of California, San Diego, CA 92093, USA.

MOTIVATION: Alignments of protein-protein interaction networks (PPIN) can be used

to predict protein function, study conserved aspects of the interactome, and to

establish evolutionary correspondences. Within this problem context, determining

multiple network alignments (MNA) is a significant challenge that involves high

computational complexity. A limited number of public MNA implementations are

available currently and the majority of the pairwise network alignment (PNA)

algorithms do not have MNA counterparts. Furthermore, current MNA algorithms do

not allow choosing a specific PPIN relative to which an MNA could be constructed.

Also, once an MNA is obtained, it cannot easily be modified, such as through

addition of a new network, without expensive re-computation of the entire MNA.

RESULTS: SMAL (Scaffold-Based Multiple Network Aligner) is a public, open-source,

web-based application for determining MNAs from existing PNAs that addresses all

the aforementioned challenges. With SMAL, PNAs can be combined rapidly to obtain

an MNA. The software also supports visualization and user-data interactions to

facilitate exploratory analysis and sensemaking. SMAL is especially useful when

multiple alignments relative to a particular PPIN are required; furthermore, SMAL

alignments are persistent in that existing correspondences between networks

(obtained during PNA or MNA) are not lost as new networks are added. In

comparative studies alongside existent MNA techniques, SMAL MNAs were found to be

superior per a number of measures, such as the total number of identified

homologs and interologs as well as the fraction of all identified correspondences

that are functionally similar or homologous to the scaffold. While directed

primarily at PPIN-alignment, SMAL is a generic network aligner and may be applied

to arbitrary networks.Availability information: The SMAL web server and source

code is available at: http://haddock6.sfsu.edu/smal/ CONTACT:

rahul@sfsu.eduSupplementary information: Supplementary data are available at

Bioinformatics online.

© The Author 2016. Published by Oxford University Press. All rights reserved. For

Permissions, please e-mail: journals.permissions@oup.com.

DOI: 10.1093/bioinformatics/btw402

PMID: 27378297

75. Bioinformatics. 2016 Nov 1;32(21):3339-3341. Epub 2016 Jul 4.

MetaPred2CS: a sequence-based meta-predictor for protein-protein interactions of

prokaryotic two-component system proteins.

Kara A(1), Vickers M(1), Swain M(1), Whitworth DE(1), Fernandez-Fuentes N(1).

Author information:

(1)Institute of Biological, Environmental and Rural Sciences, Aberystwyth

University, Aberystwyth SY23 3EB, UK.

MOTIVATION: Two-component systems (TCS) are the main signalling pathways of

prokaryotes, and control a wide range of biological phenomena. Their functioning

depends on interactions between TCS proteins, the specificity of which is poorly

understood.

RESULTS: The MetaPred2CS web-server interfaces a sequence-based meta-predictor

specifically designed to predict pairing of the histidine kinase and

response-regulator proteins forming TCSs. MetaPred2CS integrates six

sequence-based methods using a support vector machine classifier and has been

intensively tested under different benchmarking conditions: (i) species specific

gene sets; (ii) neighbouring versus orphan pairs; and (iii) k-fold cross

validation on experimentally validated datasets.

AVAILABILITY AND IMPLEMENTATION: Web server at:

http://metapred2cs.ibers.aber.ac.uk/, Source code:

https://github.com/martinjvickers/MetaPred2CS or implemented as Virtual Machine

at: http://metapred2cs.ibers.aber.ac.uk/download CONTACT:

naf4@aber.ac.ukSupplementary information: Supplementary data are available at

Bioinformatics online.

© The Author 2016. Published by Oxford University Press. All rights reserved. For

Permissions, please e-mail: journals.permissions@oup.com.

DOI: 10.1093/bioinformatics/btw403

PMID: 27378293

76. Bioinformatics. 2016 Nov 1;32(21):3333-3335. Epub 2016 Jul 4.

w4CSeq: software and web application to analyze 4C-seq data.

Cai M(1), Gao F(2), Lu W(3), Wang K(4).

Author information:

(1)Department of Preventive Medicine Eli and Edythe Broad Center for Regenerative

Medicine and Stem Cell Research Zilkha Neurogenetic Institute. (2)Eli and Edythe

Broad Center for Regenerative Medicine and Stem Cell Research Zilkha Neurogenetic

Institute. (3)Eli and Edythe Broad Center for Regenerative Medicine and Stem Cell

Research Department of Stem Cell Biology and Regenerative Medicine. (4)Zilkha

Neurogenetic Institute Department of Psychiatry, Keck School of Medicine,

University of Southern California, Los Angeles, CA 90033, USA.

Circularized Chromosome Conformation Capture followed by deep sequencing (4C-Seq)

is a powerful technique to identify genome-wide partners interacting with a

pre-specified genomic locus. Here, we present a computational and statistical

approach to analyze 4C-Seq data generated from both enzyme digestion and

sonication fragmentation-based methods. We implemented a command line software

tool and a web interface called w4CSeq, which takes in the raw 4C sequencing data

(FASTQ files) as input, performs automated statistical analysis and presents

results in a user-friendly manner. Besides providing users with the list of

candidate interacting sites/regions, w4CSeq generates figures showing genome-wide

distribution of interacting regions, and sketches the enrichment of key features

such as TSSs, TTSs, CpG sites and DNA replication timing around 4C

sites.AVAILABILITY AND IMPLEMENTATION: Users can establish their own web server

by downloading source codes at https://github.com/WGLab/w4CSeq Additionally, a

demo web server is available at http://w4cseq.wglab.org CONTACT: kaiwang@usc.edu

or wangelu@usc.eduSupplementary information: Supplementary data are available at

Bioinformatics online.

© The Author 2016. Published by Oxford University Press. All rights reserved. For

Permissions, please e-mail: journals.permissions@oup.com.

DOI: 10.1093/bioinformatics/btw408

PMCID: PMC5079477 [Available on 2017-11-01]

PMID: 27378289

77. Bioinformatics. 2016 Nov 1;32(21):3342-3344. Epub 2016 Jun 29.

Accounting for pairwise distance restraints in FFT-based protein-protein docking.

Xia B(1), Vajda S(2), Kozakov D(3).

Author information:

(1)Department of Biomedical Engineering. (2)Department of Biomedical Engineering

Department of Chemistry, Boston University, Boston, MA 02215, USA. (3)Department

of Applied Mathematics and Statistics Laufer Center for Physical and Quantitative

Biology, Stony Brook University, Stony Brook, NY 11794, USA.

ClusPro is a heavily used protein-protein docking server based on the fast

Fourier transform (FFT) correlation approach. While FFT enables global docking,

accounting for pairwise distance restraints using penalty terms in the scoring

function is computationally expensive. We use a different approach and directly

select low energy solutions that also satisfy the given restraints. As expected,

accounting for restraints generally improves the rank of near native predictions,

while retaining or even improving the numerical efficiency of FFT based

docking.AVAILABILITY AND IMPLEMENTATION: The software is freely available as part

of the ClusPro web-based server at http://cluspro.org/nousername.php CONTACT:

midas@laufercenter.org or vajda@bu.eduSupplementary information: Supplementary

data are available at Bioinformatics online.

© The Author 2016. Published by Oxford University Press. All rights reserved. For

Permissions, please e-mail: journals.permissions@oup.com.

DOI: 10.1093/bioinformatics/btw306

PMID: 27357172

78. Plant J. 2016 Nov;88(3):490-504. doi: 10.1111/tpj.13261. Epub 2016 Oct 5.

New BAR tools for mining expression data and exploring Cis-elements in

Arabidopsis thaliana.

Austin RS(1), Hiu S(1), Waese J(1), Ierullo M(1), Pasha A(1), Wang TT(1), Fan

J(1), Foong C(1), Breit R(1), Desveaux D(1), Moses A(1), Provart NJ(1).

Author information:

(1)Department of Cell & Systems Biology/Centre for the Analysis of Genome

Evolution and Function, University of Toronto, Toronto, ON, M5S 3B2, Canada.

Identifying sets of genes that are specifically expressed in certain tissues or

in response to an environmental stimulus is useful for designing reporter

constructs, generating gene expression markers, or for understanding gene

regulatory networks. We have developed an easy-to-use online tool for defining a

desired expression profile (a modification of our Expression Angler program),

which can then be used to identify genes exhibiting patterns of expression that

match this profile as closely as possible. Further, we have developed another

online tool, Cistome, for predicting or exploring cis-elements in the promoters

of sets of co-expressed genes identified by such a method, or by other methods.

We present two use cases for these tools, which are freely available on the

Bio-Analytic Resource at http://BAR.utoronto.ca.

© 2016 The Authors The Plant Journal © 2016 John Wiley & Sons Ltd.

DOI: 10.1111/tpj.13261

PMID: 27401965

79. RNA Biol. 2016 Nov;13(11):1144-1151. Epub 2016 Sep 7.

SMEpred workbench: A web server for predicting efficacy of chemicallymodified

siRNAs.

Dar SA(1), Gupta AK(1), Thakur A(1), Kumar M(1).

Author information:

(1)a Bioinformatics Center, Institute of Microbial Technology, Council of

Scientific and Industrial Research , Chandigarh , India.

Chemical modifications have been extensively exploited to circumvent shortcomings

in therapeutic applications of small interfering RNAs (siRNAs). However,

experimental designing and testing of these siRNAs or chemically modified siRNAs

(cm-siRNAs) involves enormous resources. Therefore, in-silico intervention in

designing cm-siRNAs would be of utmost importance. We developed SMEpred workbench

to predict the efficacy of normal siRNAs as well as cm-siRNAs using 3031

heterogeneous cm-siRNA sequences from siRNAmod database. These include 30

frequently used chemical modifications on different positions of either siRNA

strand. Support Vector Machine (SVM) was employed to develop predictive models

utilizing various sequence features namely mono-, di-nucleotide composition,

binary pattern and their hybrids. We achieved highest Pearson Correlation

Coefficient (PCC) of 0.80 during 10-fold cross validation and similar PCC value

in independent validation. We have provided the algorithm in the 'SMEpred'

pipeline to predict the normal siRNAs from the gene or mRNA sequence. For

multiple modifications, we have assembled 'MultiModGen' module to design multiple

modifications and further process them to evaluate their predicted efficacies.

SMEpred webserver will be useful to scientific community engaged in use of

RNAi-based technology as well as for therapeutic development. Web server is

available for public use at following URL address:

http://bioinfo.imtech.res.in/manojk/smepred .

DOI: 10.1080/15476286.2016.1229733

PMCID: PMC5100349 [Available on 2017-09-07]

PMID: 27603513

80. Gene. 2016 Oct 30;592(1):227-34. doi: 10.1016/j.gene.2016.07.059. Epub 2016 Jul

25.

Gene expression classification using epigenetic features and DNA sequence

composition in the human embryonic stem cell line H1.

Su WX(1), Li QZ(2), Zhang LQ(1), Fan GL(1), Wu CY(1), Yan ZH(1), Zuo YC(3).

Author information:

(1)Laboratory of Theoretical Biophysics, School of Physical Science and

Technology, Inner Mongolia University, Hohhot 010021, China. (2)Laboratory of

Theoretical Biophysics, School of Physical Science and Technology, Inner Mongolia

University, Hohhot 010021, China. Electronic address: qzli@imu.edu.cn. (3)The Key

Laboratory of Mammalian Reproductive Biology and Biotechnology of the Ministry of

Education, College of life sciences, Inner Mongolia University, Hohhot, 010021,

China.

Epigenetic factors are known to correlate with gene expression in the existing

studies. However, quantitative models that accurately classify the highly and

lowly expressed genes based on epigenetic factors are currently lacking. In this

study, a new machine learning method combines histone modifications, DNA

methylation, DNA accessibility, transcription factors, and trinucleotide

composition with support vector machines (SVM) is developed in the context of

human embryonic stem cell line (H1). The results indicate that the predictive

accuracy will be markedly improved when the epigenetic features are considered.

The predictive accuracy and Matthews correlation coefficient of the best model

are as high as 95.96% and 0.92 for 10-fold cross-validation test, and 95.58% and

0.92 for independent dataset test, respectively. Our model provides a good way to

judge a gene is either highly or lowly expressed gene by using genetic and

epigenetic data, when the expression data of the gene is lacking. And a

web-server GECES for our analysis method is established at

http://202.207.14.87:8032/fuwu/GECES/index.asp, so that other scientists can

easily get their desired results by our web-server, without going through the

mathematical details.

Copyright © 2016 Elsevier B.V. All rights reserved.

DOI: 10.1016/j.gene.2016.07.059

PMID: 27468948 [Indexed for MEDLINE]

81. Bioinformatics. 2016 Oct 25. pii: btw652. [Epub ahead of print]

Isomorphic semantic mapping of variant call format (VCF2RDF).

Penha ED(1), Iriabho E(1), Dussaq A(1), de Oliveira DM(2), Almeida JS(3).

Author information:

(1)Department of Pathology, Informatics Division, University of Alabama at

Birmingham, Birmingham, AL 35233, USA. (2)Rede Nordeste de Biotecnologia,

Universidade Estadual do Ceará, Fortaleza CE 60740-000, Brazil. (3)Department of

Biomedical Informatics, Stony Brook University, Stony Brook, NY 11794, USA.

The move of computational genomics workflows to Cloud Computing platforms is

associated with a new level of integration and interoperability that challenges

existing data representation formats. The Variant Calling Format (VCF) is in a

particularly sensitive position in that regard, with both clinical and

consumer-facing analysis tools relying on this self-contained description of

genomic variation in Next Generation Sequencing (NGS) results. In this report we

identify an isomorphic map between VCF and the reference Resource Description

Framework. RDF is advanced by the World Wide Web Consortium (W3C) to enable

representations of linked data that are both distributed and discoverable. The

resulting ability to decompose VCF reports of genomic variation without loss of

context addresses the need to modularize and govern NGS pipelines for Precision

Medicine. Specifically, it provides the flexibility (i.e. the indexing) needed to

support the wide variety of clinical scenarios and patient-facing governance

where only part of the VCF data is fitting.AVAILABILITY AND IMPLEMENTATION:

Software libraries with a claim to be both domain-facing and consumer-facing have

to pass the test of portability across the variety of devices that those

consumers in fact adopt. That is, ideally the implementation should itself take

place within the space defined by web technologies. Consequently, the isomorphic

mapping function was implemented in JavaScript, and was tested in a variety of

environments and devices, client and server side alike. These range from web

browsers in mobile phones to the most popular micro service platform, NodeJS. The

code is publicly available at https://github.com/ibl/VCFr, with a live deployment

at: http://ibl.github.io/VCFr/ CONTACT: jonas.almeida@stonybrookmedicine.edu.

© The Author 2016. Published by Oxford University Press. All rights reserved. For

Permissions, please e-mail: journals.permissions@oup.com.

DOI: 10.1093/bioinformatics/btw652

PMID: 27797761

82. Oncotarget. 2016 Oct 25;7(43):69783-69793. doi: 10.18632/oncotarget.11975.

iOri-Human: identify human origin of replication by incorporating dinucleotide

physicochemical properties into pseudo nucleotide composition.

Zhang CJ(1), Tang H(2), Li WC(1), Lin H(1,)(3), Chen W(1,)(4,)(3), Chou

KC(1,)(4,)(3).

Author information:

(1)Key Laboratory for Neuro-Information of Ministry of Education, School of Life

Science and Technology, Center for Informational Biology, University of

Electronic Science and Technology of China, Chengdu, 610054, China. (2)Department

of Pathophysiology, Southwest Medical University, Luzhou, 646000, China.

(3)Gordon Life Science Institute, Boston, MA, 02478, USA. (4)Department of

Physics, School of Sciences, and Center for Genomics and Computational Biology,

North China University of Science and Technology, Tangshan, 063000, China.

The initiation of replication is an extremely important process in DNA life

cycle. Given an uncharacterized DNA sequence, can we identify where its origin of

replication (ORI) is located? It is no doubt a fundamental problem in genome

analysis. Particularly, with the rapid development of genome sequencing

technology that results in a huge amount of sequence data, it is highly desired

to develop computational methods for rapidly and effectively identifying the ORIs

in these genomes. Unfortunately, by means of the existing computational methods,

such as sequence alignment or kmer strategies, it could hardly achieve decent

success rates. To address this problem, we developed a predictor called

"iOri-Human". Rigorous jackknife tests have shown that its overall accuracy and

stability in identifying human ORIs are over 75% and 50%, respectively. In the

predictor, it is through the pseudo nucleotide composition (an extension of

pseudo amino acid composition) that 96 physicochemical properties for the 16

possible constituent dinucleotides have been incorporated to reflect the global

sequence patterns in DNA as well as its local sequence patterns. Moreover, a

user-friendly web-server for iOri-Human has been established at

http://lin.uestc.edu.cn/server/iOri-Human.html, by which users can easily get

their desired results without the need to through the complicated mathematics

involved.

DOI: 10.18632/oncotarget.11975

PMID: 27626500

83. J Chem Inf Model. 2016 Oct 24;56(10):2115-2122. Epub 2016 Sep 22.

Sequence-Based Prediction of Protein-Carbohydrate Binding Sites Using Support

Vector Machines.

Taherzadeh G(1), Zhou Y(1), Liew AW(1), Yang Y(1).

Author information:

(1)School of Information and Communication Technology and ‡Institute for

Glycomics, Griffith University , Parklands Drive, Southport, Queensland 4215,

Australia.

Carbohydrate-binding proteins play significant roles in many diseases including

cancer. Here, we established a machine-learning-based method (called

sequence-based prediction of residue-level interaction sites of carbohydrates,

SPRINT-CBH) to predict carbohydrate-binding sites in proteins using support

vector machines (SVMs). We found that integrating evolution-derived sequence

profiles with additional information on sequence and predicted solvent accessible

surface area leads to a reasonably accurate, robust, and predictive method, with

area under receiver operating characteristic curve (AUC) of 0.78 and 0.77 and

Matthew's correlation coefficient of 0.34 and 0.29, respectively for 10-fold

cross validation and independent test without balancing binding and nonbinding

residues. The quality of the method is further demonstrated by having

statistically significantly more binding residues predicted for

carbohydrate-binding proteins than presumptive nonbinding proteins in the human

proteome, and by the bias of rare alleles toward predicted carbohydrate-binding

sites for nonsynonymous mutations from the 1000 genome project. SPRINT-CBH is

available as an online server at http://sparks-lab.org/server/SPRINT-CBH .

DOI: 10.1021/acs.jcim.6b00320

PMID: 27623166

84. Bioinformatics. 2016 Oct 22. pii: btw656. [Epub ahead of print]

SChloro: directing Viridiplantae proteins to six chloroplastic sub-compartments.

Savojardo C(1), Martelli PL(1), Fariselli P(2), Casadio R(1,)(3).

Author information:

(1)Biocomputing Group, BiGeA - CIG, Interdepartmental Center «Luigi Galvani» for

Integrated Studies of Bioinformatics, Biophysics and Biocomplexity, University of

Bologna, Bologna, Italy. (2)Department of Comparative Biomedicine and Food

Science (BCA), University of Padova, Padova, Italy. (3)Interdepartmental Center

«Giorgio Prodi» for Cancer Research, University of Bologna, Bologna, Italy.

MOTIVATION: Chloroplasts are organelles found in plants and involved in several

important cell processes. Similarly to other compartments in the cell,

chloroplasts have an internal structure comprising several sub-compartments,

where different proteins are targeted to perform their functions. Given the

relation between protein function and localization, the availability of effective

computational tools to predict protein sub-organelle localizations is crucial for

large-scale functional studies.

RESULTS: In this paper we present SChloro, a novel machine-learning approach to

predict protein sub-chloroplastic localization, based on targeting signal

detection and membrane protein information. The proposed approach performs

multi-label predictions discriminating six chloroplastic sub-compartments that

include inner membrane, outer membrane, stroma, thylakoid lumen, plastoglobule

and thylakoid membrane. In comparative benchmarks, the proposed method

outperforms current state-of-the-art methods in both single- and

multi-compartment predictions, with an overall multi-label accuracy of 74%. The

results demonstrate the relevance of the approach that is eligible as a good

candidate for integration into more general large-scale annotation pipelines of

protein subcellular localization.

AVAILABILITY AND IMPLEMENTATION: The method is available as web server at

http://schloro.biocomp.unibo.it CONTACT: gigi@biocomp.unibo.it.

© The Author 2016. Published by Oxford University Press.

DOI: 10.1093/bioinformatics/btw656

PMID: 27797765

85. Bioinformatics. 2016 Oct 15;32(20):3133-3141. Epub 2016 Jun 26.

pSumo-CD: predicting sumoylation sites in proteins with covariance discriminant

algorithm by incorporating sequence-coupled effects into general PseAAC.

Jia J(1), Zhang L(2), Liu Z(3), Xiao X(1), Chou KC(4).

Author information:

(1)Computer Department, Jing-De-Zhen Ceramic Institute, Jing-De-Zhen 333403,

China Gordon Life Science Institute, Boston, MA 02478, USA. (2)Computer

Department, Jing-De-Zhen Ceramic Institute, Jing-De-Zhen 333403, China. (3)School

of Computer Science and Engineering, Nanjing University of Science and

Technology, Nanjing 210094, China. (4)Gordon Life Science Institute, Boston, MA

02478, USA Center of Excellence in Genomic Medicine Research (CEGMR), King

Abdulaziz University, Jeddah 21589, Saudi Arabia Center of Bioinformatics, School

of Life Science and Technology, University of Electronic Science and Technology

of China, Chengdu 610054, China.

MOTIVATION: Sumoylation is a post-translational modification (PTM) process, in

which small ubiquitin-related modifier (SUMO) is attaching by covalent bonds to

substrate protein. It is critical to many different biological processes such as

replicating genome, expressing gene, localizing and stabilizing proteins;

unfortunately, it is also involved with many major disorders including

Alzheimer's and Parkinson's diseases. Therefore, for both basic research and drug

development, it is important to identify the sumoylation sites in proteins.

RESULTS: To address such a problem, we developed a predictor called pSumo-CD by

incorporating the sequence-coupled information into the general pseudo-amino acid

composition (PseAAC) and introducing the covariance discriminant (CD) algorithm,

in which a bias-adjustment term, which has the function to automatically adjust

the errors caused by the bias due to the imbalance of training data, had been

incorporated. Rigorous cross-validations indicated that the new predictor

remarkably outperformed the existing state-of-the-art prediction method for the

same purpose.

AVAILABILITY AND IMPLEMENTATION: For the convenience of most experimental

scientists, a user-friendly web-server for pSumo-CD has been established at

http://www.jci-bioinfo.cn/pSumo-CD, by which users can easily obtain their

desired results without the need to go through the complicated mathematical

equations involved.

CONTACT: jjia@gordonlifescience.org, xxiao@gordonlifescience.org or

kcchou@gordonlifescience.orgSupplementary information: Supplementary data are

available at Bioinformatics online.

© The Author 2016. Published by Oxford University Press. All rights reserved. For

Permissions, please e-mail: journals.permissions@oup.com.

DOI: 10.1093/bioinformatics/btw387

PMID: 27354696

86. Bioinformatics. 2016 Oct 15;32(20):3116-3123. Epub 2016 Jun 22.

iPTM-mLys: identifying multiple lysine PTM sites and their different types.

Qiu WR(1), Sun BQ(2), Xiao X(3), Xu ZC(2), Chou KC(4).

Author information:

(1)Computer Department, Jingdezhen Ceramic Institute, Jingdezhen 333403, China,

Department of Computer Science and Bond Life Science Center, University of

Missouri, Columbia MO, USA; Computational Biology, Gordon Life Science Institute,

Boston, MA 02478, USA. (2)Computer Department, Jingdezhen Ceramic Institute,

Jingdezhen 333403, China. (3)Computer Department, Jingdezhen Ceramic Institute,

Jingdezhen 333403, China, Computational Biology, Gordon Life Science Institute,

Boston, MA 02478, USA. (4)Computational Biology, Gordon Life Science Institute,

Boston, MA 02478, USA, Center of Bioinformatics, School of Life Science and

Technology, University of Electronic Science and Technology of China, Chengdu

610054, China Center of Excellence in Genomic Medicine Research (CEGMR), King

Abdulaziz University, Jeddah 21589, Saudi Arabia.

MOTIVATION: Post-translational modification, abbreviated as PTM, refers to the

change of the amino acid side chains of a protein after its biosynthesis. Owing

to its significance for in-depth understanding various biological processes and

developing effective drugs, prediction of PTM sites in proteins have currently

become a hot topic in bioinformatics. Although many computational methods were

established to identify various single-label PTM types and their occurrence sites

in proteins, no method has ever been developed for multi-label PTM types. As one

of the most frequently observed PTMs, the K-PTM, namely, the modification

occurring at lysine (K), can be usually accommodated with many different types,

such as 'acetylation', 'crotonylation', 'methylation' and 'succinylation'. Now we

are facing an interesting challenge: given an uncharacterized protein sequence

containing many K residues, which ones can accommodate two or more types of PTM,

which ones only one, and which ones none?

RESULTS: To address this problem, a multi-label predictor called IPTM-MLYS: has

been developed. It represents the first multi-label PTM predictor ever

established. The novel predictor is featured by incorporating the

sequence-coupled effects into the general PseAAC, and by fusing an array of basic

random forest classifiers into an ensemble system. Rigorous cross-validations via

a set of multi-label metrics indicate that the first multi-label PTM predictor is

very promising and encouraging.

AVAILABILITY AND IMPLEMENTATION: For the convenience of most experimental

scientists, a user-friendly web-server for iPTM-mLys has been established at

http://www.jci-bioinfo.cn/iPTM-mLys, by which users can easily obtain their

desired results without the need to go through the complicated mathematical

equations involved.

CONTACT: wqiu@gordonlifescience.org, xxiao@gordonlifescience.org,

kcchou@gordonlifescience.orgSupplementary information: Supplementary data are

available at Bioinformatics online.

© The Author 2016. Published by Oxford University Press. All rights reserved. For

Permissions, please e-mail: journals.permissions@oup.com.

DOI: 10.1093/bioinformatics/btw380

PMID: 27334473

87. Mar Pollut Bull. 2016 Oct 15;111(1-2):330-8. doi:

10.1016/j.marpolbul.2016.06.090. Epub 2016 Jul 4.

Fate, behaviour and weathering of priority HNS in the marine environment: An

online tool.

Cunha I(1), Oliveira H(2), Neuparth T(1), Torres T(1), Santos MM(3).

Author information:

(1)CIMAR/CIIMAR, Interdisciplinary Centre of Marine and Environmental Research,

University of Porto, Rua dos Bragas 289, 4050-123 Porto, Portugal.

(2)CIMAR/CIIMAR, Interdisciplinary Centre of Marine and Environmental Research,

University of Porto, Rua dos Bragas 289, 4050-123 Porto, Portugal. Electronic

address: helaoliveira@gmail.com. (3)CIMAR/CIIMAR, Interdisciplinary Centre of

Marine and Environmental Research, University of Porto, Rua dos Bragas 289,

4050-123 Porto, Portugal; FCUP, Department of Biology, Faculty of Sciences,

University of Porto, Rua do Campo Alegre, 4169-007 Porto, Portugal. Electronic

address: santos@ciimar.up.pt.

Literature data and data obtained with modelling tools were compiled to derive

the physicochemical behaviour of 24 priority Hazardous and Noxious Substances

(HNS), as a proxy to improve environmental, public health and political issues in

relation to HNS spills. Parameters that rule the HNS behaviour in water and those

that determine their distribution and persistence in the environment, such as

fugacity, physicochemical degradation, biodegradation,

bioaccumulation/biotransformation and aquatic toxicity, were selected. Data

systematized and produced in the frame of the Arcopol Platform project was made

available through a public database (http://www.ciimar.up.pt/hns/substances.php).

This tool is expected to assist stakeholders involved in HNS spills preparedness

and response, policy makers and legislators, as well as to contribute to a

current picture of the scientific knowledge on the fate, behaviour, weathering

and toxicity of priority HNS, being essential to support future improvements in

maritime safety and coastal pollution response before, during and after spill

incidents.

Copyright © 2016 Elsevier Ltd. All rights reserved.

DOI: 10.1016/j.marpolbul.2016.06.090

PMID: 27389461

88. Bioinformatics. 2016 Oct 14. pii: btw639. [Epub ahead of print]

LDAP: a web server for lncRNA-disease association prediction.

Lan W(1), Li M(1), Zhao K(1), Liu J(1), Wu FX(2), Pan Y(3), Wang J(1).

Author information:

(1)School of Information Science and Engineering, Central South University,

Changsha 410083, China. (2)Division of Biomedical Engineering, University of

Saskatchewan, Saskatoon SKS7N5A9, Canada. (3)Department of Computer Science,

Georgia State University, Atlanta, GA 30302, USA.

MOTIVATION: Increasing evidences have demonstrated that long noncoding RNAs

(lncRNAs) play important roles in many human diseases. Therefore, predicting

novel lncRNA-disease associations would contribute to dissect the complex

mechanisms of disease pathogenesis. Some computational methods have been

developed to infer lncRNA-disease associations. However, most of these methods

infer lncRNA-disease associations only based on single data resource.

RESULTS: In this paper, we propose a new computational method to predict

lncRNA-disease associations by integrating multiple biological data resources.

Then, we implement this method as a web server for lncRNA-disease association

prediction (LDAP). The input of the LDAP server is the lncRNA sequence. The LDAP

predicts potential lncRNA-disease associations by using a bagging SVM classifier

based on lncRNA similarity and disease similarity.

AVAILABILITY AND IMPLEMENTATION: The web server is available at

http://bioinformatics.csu.edu.cn/ldap CONTACT:

jxwang@mail.csu.edu.cnSupplementary information: Supplementary data are available

at Bioinformatics online.

© The Author 2016. Published by Oxford University Press. All rights reserved. For

Permissions, please e-mail: journals.permissions@oup.com.

DOI: 10.1093/bioinformatics/btw639

PMID: 27742699

89. Bioinformatics. 2016 Oct 14. pii: btw644. [Epub ahead of print]

iATC-mISF: a multi-label classifier for predicting the classes of anatomical

therapeutic chemicals.

Cheng X(1,)(2), Zhao SG(1), Xiao X(2,)(3), Chou KC(3,)(4,)(5).

Author information:

(1)College of Information Science and Technology, Donghua University, Shanghai,

China. (2)Computer Department, Jingdezhen Ceramic Institute, Jingdezhen, China.

(3)Gordon Life Science Institute, Boston, MA 02478, USA. (4)Key Laboratory for

Neuro-Information of Ministry of Education, School of Life Science and

Technology, Center for Informational Biology, University of Electronic Science

and Technology of China, Chengdu 610054, China. (5)Center of Excellence in

Genomic Medicine Research (CEGMR), King Abdulaziz University, Jeddah 21589, Saudi

Arabia.

MOTIVATION: Given a compound, can we predict which anatomical therapeutic

chemical (ATC) class/classes it belongs to? It is a challenging problem since the

information thus obtained can be used to deduce its possible active ingredients,

as well as its therapeutic, pharmacological and chemical properties. And hence

the pace of drug development could be substantially expedited. But this problem

is by no means an easy one. Particularly, some drugs or compounds may belong to

two or more ATC classes.

RESULTS: To address it, a multi-label classifier, called IATC-MISF: , was

developed by incorporating the information of chemical-chemical interaction, the

information of the structural similarity, and the information of the

fingerprintal similarity. Rigorous cross-validations showed that the proposed

predictor achieved remarkably higher prediction quality than its cohorts for the

same purpose, particularly in the absolute true rate, the most important and

harsh metrics for the multi-label systems.

AVAILABILITY AND IMPLEMENTATION: The web-server for iATC-mISF is accessible at

http://www.jci-bioinfo.cn/iATC-mISF Furthermore, to maximize the convenience for

most experimental scientists, a step-by-step guide was provided, by which users

can easily get their desired results without needing to go through the

complicated mathematical equations. Their inclusion in this article is just for

the integrity of the new method and stimulating more powerful methods to deal

with various multi-label systems in biology.

CONTACT: xxiao@gordonlifescience.orgSupplementary information: Supplementary data

are available at Bioinformatics online.

© The Authors 2016. Published by Oxford University Press. All rights reserved.

For Permissions, please e-mail: journals.permissions@oup.com.

DOI: 10.1093/bioinformatics/btw644

PMID: 27742696

90. Sci Rep. 2016 Oct 13;6:34651. doi: 10.1038/srep34651.

3Disease Browser: A Web server for integrating 3D genome and disease-associated

chromosome rearrangement data.

Li R(1), Liu Y(2), Li T(1), Li C(1,)(3).

Author information:

(1)Peking-Tsinghua Center for Life Sciences, Academy for Advanced

Interdisciplinary Studies; School of Life Sciences, Peking University, Beijing,

China. (2)School of Life Sciences, Tsinghua University, Beijing, China. (3)Center

for Statistical Science; Center for Bioinformatics, Peking University, Beijing,

China.

Chromosomal rearrangement (CR) events have been implicated in many tumor and

non-tumor human diseases. CR events lead to their associated diseases by

disrupting gene and protein structures. Also, they can lead to diseases through

changes in chromosomal 3D structure and gene expression. In this study, we search

for CR-associated diseases potentially caused by chromosomal 3D structure

alteration by integrating Hi-C and ChIP-seq data. Our algorithm rediscovers

experimentally verified disease-associated CRs (polydactyly diseases) that alter

gene expression by disrupting chromosome 3D structure. Interestingly, we find

that intellectual disability may be a candidate disease caused by 3D chromosome

structure alteration. We also develop a Web server (3Disease Browser,

http://3dgb.cbi.pku.edu.cn/disease/) for integrating and visualizing

disease-associated CR events and chromosomal 3D structure.

DOI: 10.1038/srep34651

PMCID: PMC5062081

PMID: 27734896

91. IEEE/ACM Trans Comput Biol Bioinform. 2016 Oct 11. [Epub ahead of print]

Predicting Protein-DNA Binding Residues by Weightedly Combining Sequence-based

Features and Boosting Multiple SVMs.

Hu J, Li Y, Zhang M, Yang X, Shen HB, Yu DJ.

Protein-DNA interactions are ubiquitous in a wide variety of biological

processes. Correctly locating DNA-binding residues solely from protein sequences

is an important but challenging task for protein function annotations and drug

discovery, especially in the post-genomic era where large volumes of protein

sequences have quickly accumulated. In this study, we report a new predictor,

named TargetDNA, for targeting protein-DNA binding residues from primary

sequences. TargetDNA uses a protein's evolutionary information and its predicted

solvent accessibility as two base features and employs a centered linear kernel

alignment algorithm to learn the weights for weightedly combining the two

features. Based on the weightedly combined feature, multiple initial predictors

with SVM as classifiers are trained by applying a random under-sampling technique

to the original dataset, the purpose of which is to cope with the severe

imbalance phenomenon that exists between the number of DNA-binding and

non-binding residues. The final ensembled predictor is obtained by boosting the

multiple initially trained predictors. Experimental simulation results

demonstrate that the proposed TargetDNA achieves a high prediction performance

and outperforms many existing sequence-based protein-DNA binding residue

predictors. The TargetDNA web server and datasets are freely available at

http://csbio.njust.edu.cn/bioinf/TargetDNA/ for academic use.

DOI: 10.1109/TCBB.2016.2616469

PMID: 27740495

92. Sci Rep. 2016 Oct 11;6:35123. doi: 10.1038/srep35123.

PAI: Predicting adenosine to inosine editing sites by using pseudo nucleotide

compositions.

Chen W(1), Feng P(2), Ding H(3), Lin H(3).

Author information:

(1)Department of Physics, School of Sciences, and Center for Genomics and

Computational Biology, North China University of Science and Technology,

Tangshan, 063000, China. (2)School of Public Health, North China University of

Science and Technology, Tangshan, 063000, China. (3)Key Laboratory for

Neuro-Information of Ministry of Education, School of Life Science and

Technology, Center for Informational Biology, University of Electronic Science

and Technology of China, Chengdu 610054, China.

The adenosine to inosine (A-to-I) editing is the most prevalent kind of RNA

editing and involves in many biological processes. Accurate identification of

A-to-I editing site is invaluable for better understanding its biological

functions. Due to the limitations of experimental methods, in the present study,

a support vector machine based-model, called PAI, is proposed to identify A-to-I

editing site in D. melanogaster. In this model, RNA sequences are encoded by

"pseudo dinucleotide composition" into which six RNA physiochemical properties

were incorporated. PAI achieves promising performances in jackknife test and

independent dataset test, indicating that it holds very high potential to become

a useful tool for identifying A-to-I editing site. For the convenience of

experimental scientists, a web-server was constructed for PAI and it is freely

accessible at http://lin.uestc.edu.cn/server/PAI.

DOI: 10.1038/srep35123

PMCID: PMC5057124

PMID: 27725762

93. Sci Rep. 2016 Oct 11;6:34985. doi: 10.1038/srep34985.

circRNADb: A comprehensive database for human circular RNAs with protein-coding

annotations.

Chen X(1), Han P(2), Zhou T(3), Guo X(3), Song X(1), Li Y(3,)(4).

Author information:

(1)Department of Biomedical Engineering, Nanjing University of Aeronautics and

Astronautics, Nanjing 211106, China. (2)Department of Gynecology and Obstetrics,

The First Affiliated Hospital with Nanjing Medical University, Nanjing 210029,

China. (3)State Key Laboratory of Reproductive Medicine, Department of Histology

and Embryology, Nanjing Medical University, Nanjing 210029, China. (4)Center of

Pathology and Clinical Laboratory, Sir Run Run Hospital Affiliated with Nanjing

Medical University, Nanjing 211166, China.

It has been known that circular RNAs are widely expressed in human tissues and

cells, and play important regulatory roles in physiological or pathological

processes. However, there is lack of comprehensively annotated human circular

RNAs database. In this study we established a circRNA database, named as

circRNADb, containing 32,914 human exonic circRNAs carefully selected from

diversified sources. The detailed information of the circRNA, including genomic

information, exon splicing, genome sequence, internal ribosome entry site (IRES),

open reading frame (ORF) and references were provided in circRNADb. In addition,

circRNAs were found to be able to encode proteins, which have not been reported

in any species. 16328 circRNAs were annotated to have ORF longer than 100 amino

acids, of which 7170 have IRES elements. 46 circRNAs from 37 genes were found to

have their corresponding proteins expressed according mass spectrometry. The

database provides the function of data search, browse, download, submit and

feedback for the user to study particular circular RNA of interest and update the

database continually. circRNADb will be built to be a biological information

platform for circRNA molecules and related biological functions in the future.

The database can be freely available through the web server at

http://reprod.njmu.edu.cn/circrnadb.

DOI: 10.1038/srep34985

PMCID: PMC5057092

PMID: 27725737

94. PLoS One. 2016 Oct 10;11(10):e0162707. doi: 10.1371/journal.pone.0162707.

eCollection 2016.

RNAMethPre: A Web Server for the Prediction and Query of mRNA m6A Sites.

Xiang S(1), Liu K(1,)(2), Yan Z(1), Zhang Y(3), Sun Z(1).

Author information:

(1)MOE Key Laboratory of Bioinformatics, School of Life Sciences, Tsinghua

University, Beijing, 100084, P. R. China. (2)Department of Statistics, University

of California, Berkeley, California, 94720, United States of America. (3)Key Lab

in Healthy Science and Technology, Division of Life Science, Graduate School at

Shenzhen, Tsinghua University, Beijing, 518055, P. R. China.

N6-Methyladenosine (m6A) is the most common mRNA modification; it occurs in a

wide range of taxon and is associated with many key biological processes.

High-throughput experiments have identified m6A-peaks and sites across the

transcriptome, but studies of m6A sites at the transcriptome-wide scale are

limited to a few species and tissue types. Therefore, the computational

prediction of mRNA m6A sites has become an important strategy. In this study, we

integrated multiple features of mRNA (flanking sequences, local secondary

structure information, and relative position information) and trained a SVM

classifier to predict m6A sites in mammalian mRNA sequences. Our method achieves

ideal performance in both cross-validation tests and rigorous independent dataset

tests. The server also provides a comprehensive database of predicted

transcriptome-wide m6A sites and curated m6A-seq peaks from the literature for

both human and mouse, and these can be queried and visualized in a genome

browser. The RNAMethPre web server provides a user-friendly tool for the

prediction and query of mRNA m6A sites, which is freely accessible for public use

at http://bioinfo.tsinghua.edu.cn/RNAMethPre/index.html.

DOI: 10.1371/journal.pone.0162707

PMCID: PMC5056760

PMID: 27723837

Conflict of interest statement: The authors have declared that no competing

interests exist.

95. BMC Bioinformatics. 2016 Oct 7;17(1):411.

RStrucFam: a web server to associate structure and cognate RNA for RNA-binding

proteins from sequence information.

Ghosh P(1), Mathew OK(1,)(2), Sowdhamini R(3).

Author information:

(1)National Centre for Biological Sciences, Tata Institute of Fundamental

Research, Bellary Road, Bangalore, Karnataka, 560 065, India. (2)SASTRA

University, Tirumalaisamudram, Thanjavur, 613401, Tamil Nadu, India. (3)National

Centre for Biological Sciences, Tata Institute of Fundamental Research, Bellary

Road, Bangalore, Karnataka, 560 065, India. mini@ncbs.res.in.

BACKGROUND: RNA-binding proteins (RBPs) interact with their cognate RNA(s) to

form large biomolecular assemblies. They are versatile in their functionality and

are involved in a myriad of processes inside the cell. RBPs with similar

structural features and common biological functions are grouped together into

families and superfamilies. It will be useful to obtain an early understanding

and association of RNA-binding property of sequences of gene products. Here, we

report a web server, RStrucFam, to predict the structure, type of cognate RNA(s)

and function(s) of proteins, where possible, from mere sequence information.

RESULTS: The web server employs Hidden Markov Model scan (hmmscan) to enable

association to a back-end database of structural and sequence families. The

database (HMMRBP) comprises of 437 HMMs of RBP families of known structure that

have been generated using structure-based sequence alignments and 746

sequence-centric RBP family HMMs. The input protein sequence is associated with

structural or sequence domain families, if structure or sequence signatures

exist. In case of association of the protein with a family of known structures,

output features like, multiple structure-based sequence alignment (MSSA) of the

query with all others members of that family is provided. Further, cognate RNA

partner(s) for that protein, Gene Ontology (GO) annotations, if any and a

homology model of the protein can be obtained. The users can also browse through

the database for details pertaining to each family, protein or RNA and their

related information based on keyword search or RNA motif search.

CONCLUSIONS: RStrucFam is a web server that exploits structurally conserved

features of RBPs, derived from known family members and imprinted in mathematical

profiles, to predict putative RBPs from sequence information. Proteins that fail

to associate with such structure-centric families are further queried against the

sequence-centric RBP family HMMs in the HMMRBP database. Further, all other

essential information pertaining to an RBP, like overall function annotations,

are provided. The web server can be accessed at the following link:

http://caps.ncbs.res.in/rstrucfam .

DOI: 10.1186/s12859-016-1289-x

PMCID: PMC5054549

PMID: 27717309

96. IEEE/ACM Trans Comput Biol Bioinform. 2016 Oct 4. doi: 10.1109/TCBB.2016.2615010.

[Epub ahead of print]

HEMEsPred: Structure-based Ligand-specific Heme Binding Residues Prediction by

Using Fast-adaptive Ensemble Learning Scheme.

Zhang J, Chai H, Gao B, Yang G, Ma Z.

Heme is an essential biomolecule that widely exists in numerous extant organisms.

Accurately identifying heme binding residues (HEMEs) is of great importance in

disease progression and drug development. In this study, a novel predictor named

HEMEsPred was proposed for predicting HEMEs. First, several sequence- and

structure-based features, including amino acid composition, motifs, surface

preferences and secondary structure, were collected to construct feature

matrices. Second, a novel fast-adaptive ensemble learning scheme was designed to

overcome the serious class-imbalance problem as well as to enhance the prediction

performance. Third, we further developed ligand-specific models considering that

different heme ligands varied significantly in their roles, sizes and

distributions. Statistical test proved the effectiveness of ligand-specific

models. Experimental results on benchmark datasets demonstrated good robustness

of our proposed method. Furthermore, our method also showed good generalization

capability and outperformed many state-of-art predictors on two independent

testing datasets. HEMEsPred web server was available at

http://www.inforstation.com/HEMEsPred/ for free academic use.

DOI: 10.1109/TCBB.2016.2615010

PMID: 28029626

97. IEEE/ACM Trans Comput Biol Bioinform. 2016 Oct 4. [Epub ahead of print]

HEMEsPred: Structure-based Ligand-specific Heme Binding Residues Prediction by

Using Fast-adaptive Ensemble Learning Scheme.

Zhang J, Chai H, Gao B, Yang G, Ma Z.

Heme is an essential biomolecule that widely exists in numerous extant organisms.

Accurately identifying heme binding residues (HEMEs) is of great importance in

disease progression and drug development. In this study, a novel predictor named

HEMEsPred was proposed for predicting HEMEs. First, several sequence- and

structure-based features, including amino acid composition, motifs, surface

preferences and secondary structure, were collected to construct feature

matrices. Second, a novel fast-adaptive ensemble learning scheme was designed to

overcome the serious class-imbalance problem as well as to enhance the prediction

performance. Third, we further developed ligand-specific models considering that

different heme ligands varied significantly in their roles, sizes and

distributions. Statistical test proved the effectiveness of ligand-specific

models. Experimental results on benchmark datasets demonstrated good robustness

of our proposed method. Furthermore, our method also showed good generalization

capability and outperformed many state-of-art predictors on two independent

testing datasets. HEMEsPred web server was available at

http://59.73.198.144:8080/HEMEsPred/ for free academic use.

DOI: 10.1109/TCBB.2016.2615010

PMID: 27775533

98. PLoS One. 2016 Oct 3;11(10):e0163497. doi: 10.1371/journal.pone.0163497.

eCollection 2016.

Graphlet Based Metrics for the Comparison of Gene Regulatory Networks.

Martin AJ(1,)(2), Dominguez C(1,)(3), Contreras-Riquelme S(1), Holmes DS(3),

Perez-Acle T(1,)(2).

Author information:

(1)Computational Biology Lab, Fundación Ciencia & Vida, Santiago, Chile.

(2)Centro Interdisciplinario de Neurociencia de Valparaíso, Universidad de

Valparaíso, Chile. (3)Center for Bioinformatics and Genome Biology, Fundación

Ciencia & Vida and Facultad de Ciencias Biologicas, Universidad Andres Bello,

Santiago, Chile.

Understanding the control of gene expression remains one of the main challenges

in the post-genomic era. Accordingly, a plethora of methods exists to identify

variations in gene expression levels. These variations underlay almost all

relevant biological phenomena, including disease and adaptation to environmental

conditions. However, computational tools to identify how regulation changes are

scarce. Regulation of gene expression is usually depicted in the form of a gene

regulatory network (GRN). Structural changes in a GRN over time and conditions

represent variations in the regulation of gene expression. Like other biological

networks, GRNs are composed of basic building blocks called graphlets. As a

consequence, two new metrics based on graphlets are proposed in this work:

REConstruction Rate (REC) and REC Graphlet Degree (RGD). REC determines the rate

of graphlet similarity between different states of a network and RGD identifies

the subset of nodes with the highest topological variation. In other words, RGD

discerns how th GRN was rewired. REC and RGD were used to compare the local

structure of nodes in condition-specific GRNs obtained from gene expression data

of Escherichia coli, forming biofilms and cultured in suspension. According to

our results, most of the network local structure remains unaltered in the two

compared conditions. Nevertheless, changes reported by RGD necessarily imply that

a different cohort of regulators (i.e. transcription factors (TFs)) appear on the

scene, shedding light on how the regulation of gene expression occurs when E.

coli transits from suspension to biofilm. Consequently, we propose that both

metrics REC and RGD should be adopted as a quantitative approach to conduct

differential analyses of GRNs. A tool that implements both metrics is available

as an on-line web server (http://dlab.cl/loto).

DOI: 10.1371/journal.pone.0163497

PMCID: PMC5047442

PMID: 27695050

Conflict of interest statement: The authors have declared that no competing

interests exist.

99. Bioinformatics. 2016 Oct 1;32(19):3041-3. doi: 10.1093/bioinformatics/btw332.

Epub 2016 Jun 13.

Web-based network analysis and visualization using CellMaps.

Salavert F(1), García-Alonso L(2), Sánchez R(2), Alonso R(3), Bleda M(4), Medina

I(5), Dopazo J(6).

Author information:

(1)Computational Genomics Department, Centro de Investigación Príncipe Felipe

(CIPF), Valencia 46012, Spain Bioinformatics of Rare Diseases (BIER), CIBER de

Enfermedades Raras (CIBERER), Valencia, Spain. (2)Computational Genomics

Department, Centro de Investigación Príncipe Felipe (CIPF), Valencia 46012,

Spain. (3)Computational Genomics Department, Centro de Investigación Príncipe

Felipe (CIPF), Valencia 46012, Spain Bull-CIPF, Computational Genomics Chair,

Valencia 46012, Spain. (4)Department of Medicine, University of Cambridge, School

of Clinical Medicine, Addenbrooke's Hospital, Hills Road, Cambridge CB2 0QQ, UK.

(5)HPC Service, UIS, University of Cambridge, Cambridge, UK. (6)Computational

Genomics Department, Centro de Investigación Príncipe Felipe (CIPF), Valencia

46012, Spain Bioinformatics of Rare Diseases (BIER), CIBER de Enfermedades Raras

(CIBERER), Valencia, Spain Functional Genomics Node, (INB, PRB2, ISCIII) at CIPF,

Valencia 46012, Spain.

: CellMaps is an HTML5 open-source web tool that allows displaying, editing,

exploring and analyzing biological networks as well as integrating metadata into

them. Computations and analyses are remotely executed in high-end servers, and

all the functionalities are available through RESTful web services. CellMaps can

easily be integrated in any web page by using an available JavaScript

API.AVAILABILITY AND IMPLEMENTATION: The application is available at:

http://cellmaps.babelomics.org/ and the code can be found in:

https://github.com/opencb/cell-maps The client is implemented in JavaScript and

the server in C and Java.

CONTACT: jdopazo@cipf.es

SUPPLEMENTARY INFORMATION: Supplementary data are available at Bioinformatics

online.

© The Author 2016. Published by Oxford University Press.

DOI: 10.1093/bioinformatics/btw332

PMCID: PMC5039919

PMID: 27296979

100. Comput Methods Programs Biomed. 2016 Oct;135:101-4. doi:

10.1016/j.cmpb.2016.07.023. Epub 2016 Jul 21.

Digital questionnaire platform in the Danish Blood Donor Study.

Burgdorf KS(1), Felsted N(2), Mikkelsen S(3), Nielsen MH(4), Thørner LW(4),

Pedersen OB(5), Sørensen E(4), Nielsen KR(6), Bruun MT(7), Werge T(2), Erikstrup

C(3), Hansen T(2), Ullum H(4).

Author information:

(1)Department of Clinical Immunology, Copenhagen University Hospital,

Rigshospitalet, Copenhagen, Denmark. Electronic address:

kristoffer.soelvsten.burgdorf@regionh.dk. (2)Institute of Biological Psychiatry,

Mental Health Centre Sct. Hans, Copenhagen University Hospital, Roskilde,

Denmark. (3)Department of Clinical Immunology, Aarhus University Hospital,

Aarhus, Denmark. (4)Department of Clinical Immunology, Copenhagen University

Hospital, Rigshospitalet, Copenhagen, Denmark. (5)Department of Clinical

Immunology, Naestved Hospital, Naestved, Denmark. (6)Department of Clinical

Immunology, Aalborg University Hospital, Aalborg, Denmark. (7)Department of

Clinical Immunology, Odense University Hospital, Odense, Denmark.

OBJECTIVES: The Danish Blood Donor Study (DBDS) is a prospective,

population-based study and biobank. Since 2010, 100,000 Danish blood donors have

been included in the study. Prior to July 2015 all participating donors had to

complete a paper-based questionnaire. Here we describe the establishment of a

digital tablet-based questionnaire platform implemented in blood bank sites

across Denmark.

METHODS: The digital questionnaire was developed using the open source survey

software tool LimeSurvey. The participants accesses the questionnaire online with

a standard SSL encrypted HTTP connection using their personal civil registration

numbers. The questionnaire is placed at a front-end web server and a collection

server retrieves the completed questionnaires. Data from blood samples, register

data, genetic data and verification of signed informed consent are then

transferred to and merged with the questionnaire data in the DBDS database.

RESULTS: The digital platform enables personalized questionnaires, presenting

only questions relevant to the specific donor by hiding unneeded follow-up

questions on screening question results. New versions of questionnaires are

immediately available at all blood collection facilities when new projects are

initiated.

CONCLUSION: The digital platform is a faster, cost-effective and more flexible

solution to collect valid data from participating donors compared to paper-based

questionnaires. The overall system can be used around the world by the use of

Internet connection, but the level of security depends on the sensitivity of the

data to be collected.

Copyright © 2016 The Authors. Published by Elsevier Ireland Ltd.. All rights

reserved.

DOI: 10.1016/j.cmpb.2016.07.023

PMID: 27586483 [Indexed for MEDLINE]

101. IEEE Trans Nanobioscience. 2016 Oct;15(7):674-682. doi: 10.1109/TNB.2016.2599115.

Epub 2016 Aug 10.

TargetM6A: Identifying N(6)-Methyladenosine Sites From RNA Sequences via

Position-Specific Nucleotide Propensities and a Support Vector Machine.

Li GQ, Liu Z, Shen HB, Yu DJ.

As one of the most ubiquitous post-transcriptional modifications of RNA,

N(6)-methyladenosine ( [Formula: see text]) plays an essential role in many vital

biological processes. The identification of [Formula: see text] sites in RNAs is

significantly important for both basic biomedical research and practical drug

development. In this study, we designed a computational-based method, called

TargetM6A, to rapidly and accurately target [Formula: see text] sites solely from

the primary RNA sequences. Two new features, i.e., position-specific

nucleotide/dinucleotide propensities (PSNP/PSDP), are introduced and combined

with the traditional nucleotide composition (NC) feature to formulate RNA

sequences. The extracted features are further optimized to obtain a much more

compact and discriminative feature subset by applying an incremental feature

selection (IFS) procedure. Based on the optimized feature subset, we trained

TargetM6A on the training dataset with a support vector machine (SVM) as the

prediction engine. We compared the proposed TargetM6A method with existing

methods for predicting [Formula: see text] sites by performing stringent

jackknife tests and independent validation tests on benchmark datasets. The

experimental results show that the proposed TargetM6A method outperformed the

existing methods for predicting [Formula: see text] sites and remarkably improved

the prediction performances, with MCC = 0.526 and AUC = 0.818. We also provided a

user-friendly web server for TargetM6A, which is publicly accessible for academic

use at http://csbio.njust.edu.cn/bioinf/TargetM6A.

DOI: 10.1109/TNB.2016.2599115

PMID: 27552763

102. Protein Sci. 2016 Oct;25(10):1825-33. doi: 10.1002/pro.2991. Epub 2016 Aug 9.

Improving protein-protein interactions prediction accuracy using protein

evolutionary information and relevance vector machine model.

An JY(1), Meng FR(1), You ZH(2), Chen X(3), Yan GY(4), Hu JP(1).

Author information:

(1)School of Computer Science Technology, China University of Mining and

Technology, Xuzhou, Jiangsu, 21116, China. (2)School of Computer Science

Technology, China University of Mining and Technology, Xuzhou, Jiangsu, 21116,

China. zhuhongyou@hotmail.com. (3)School of Information and Electrical

Engineering, China University of Mining and Technology, Xuzhou, Jiangsu, 21116,

China. (4)Academy of Mathematics and Systems Science, Chinese Academy of

Sciences, Beijing, 100190, China.

Predicting protein-protein interactions (PPIs) is a challenging task and

essential to construct the protein interaction networks, which is important for

facilitating our understanding of the mechanisms of biological systems. Although

a number of high-throughput technologies have been proposed to predict PPIs,

there are unavoidable shortcomings, including high cost, time intensity, and

inherently high false positive rates. For these reasons, many computational

methods have been proposed for predicting PPIs. However, the problem is still far

from being solved. In this article, we propose a novel computational method

called RVM-BiGP that combines the relevance vector machine (RVM) model and

Bi-gram Probabilities (BiGP) for PPIs detection from protein sequences. The major

improvement includes (1) Protein sequences are represented using the Bi-gram

probabilities (BiGP) feature representation on a Position Specific Scoring Matrix

(PSSM), in which the protein evolutionary information is contained; (2) For

reducing the influence of noise, the Principal Component Analysis (PCA) method is

used to reduce the dimension of BiGP vector; (3) The powerful and robust

Relevance Vector Machine (RVM) algorithm is used for classification. Five-fold

cross-validation experiments executed on yeast and Helicobacter pylori datasets,

which achieved very high accuracies of 94.57 and 90.57%, respectively.

Experimental results are significantly better than previous methods. To further

evaluate the proposed method, we compare it with the state-of-the-art support

vector machine (SVM) classifier on the yeast dataset. The experimental results

demonstrate that our RVM-BiGP method is significantly better than the SVM-based

method. In addition, we achieved 97.15% accuracy on imbalance yeast dataset,

which is higher than that of balance yeast dataset. The promising experimental

results show the efficiency and robust of the proposed method, which can be an

automatic decision support tool for future proteomics research. For facilitating

extensive studies for future proteomics research, we developed a freely available

web server called RVM-BiGP-PPIs in Hypertext Preprocessor (PHP) for predicting

PPIs. The web server including source code and the datasets are available at

http://219.219.62.123:8888/BiGP/.

© 2016 The Authors Protein Science published by Wiley Periodicals, Inc. on behalf

of The Protein Society.

DOI: 10.1002/pro.2991

PMCID: PMC5029537

PMID: 27452983

103. Biochem Biophys Res Commun. 2016 Sep 30;478(4):1739-45. doi:

10.1016/j.bbrc.2016.09.015. Epub 2016 Sep 4.

Palindrome analyser - A new web-based server for predicting and evaluating

inverted repeats in nucleotide sequences.

Brázda V(1), Kolomazník J(2), Lýsek J(2), Hároníková L(3), Coufal J(3), Št'astný

J(2).

Author information:

(1)Institute of Biophysics, Academy of Sciences of the Czech Republic,

Královopolská 135, 612 65, Brno, Czech Republic. Electronic address:

vaclav@ibp.cz. (2)Mendel University in Brno, Zemědělská 1, 613 00, Brno, Czech

Republic. (3)Institute of Biophysics, Academy of Sciences of the Czech Republic,

Královopolská 135, 612 65, Brno, Czech Republic.

DNA cruciform structures play an important role in the regulation of natural

processes including gene replication and expression, as well as nucleosome

structure and recombination. They have also been implicated in the evolution and

development of diseases such as cancer and neurodegenerative disorders. Cruciform

structures are formed by inverted repeats, and their stability is enhanced by DNA

supercoiling and protein binding. They have received broad attention because of

their important roles in biology. Computational approaches to study inverted

repeats have allowed detailed analysis of genomes. However, currently there are

no easily accessible and user-friendly tools that can analyse inverted repeats,

especially among long nucleotide sequences. We have developed a web-based server,

Palindrome analyser, which is a user-friendly application for analysing inverted

repeats in various DNA (or RNA) sequences including genome sequences and

oligonucleotides. It allows users to search and retrieve desired gene/nucleotide

sequence entries from the NCBI databases, and provides data on length, sequence,

locations and energy required for cruciform formation. Palindrome analyser also

features an interactive graphical data representation of the distribution of the

inverted repeats, with options for sorting according to the length of inverted

repeat, length of loop, and number of mismatches. Palindrome analyser can be

accessed at http://bioinformatics.ibp.cz.

Copyright © 2016 Elsevier Inc. All rights reserved.

DOI: 10.1016/j.bbrc.2016.09.015

PMID: 27603574

104. Nucleic Acids Res. 2016 Sep 30;44(17):8433-41. doi: 10.1093/nar/gkw558. Epub 2016

Jun 21.

RNAlien - Unsupervised RNA family model construction.

Eggenhofer F(1), Hofacker IL(2), Höner Zu Siederdissen C(3).

Author information:

(1)Institute for Theoretical Chemistry, University of Vienna, Währingerstrasse

17, A-1090 Vienna, Austria Bioinformatics Group, Department of Computer Science

University of Freiburg, Georges-Köhler-Allee, 79110 Freiburg, Germany

egg@informatik.uni-freiburg.de. (2)Institute for Theoretical Chemistry,

University of Vienna, Währingerstrasse 17, A-1090 Vienna, Austria Research Group

Bioinformatics and Computational Biology, Faculty of Computer Science, University

of Vienna, A-1090 Vienna, Austria. (3)Institute for Theoretical Chemistry,

University of Vienna, Währingerstrasse 17, A-1090 Vienna, Austria Bioinformatics

Group, Department of Computer Science, University of Leipzig, D-04107 Leipzig,

Germany Interdisciplinary Center for Bioinformatics, University of Leipzig,

Härtelstraße 16-18, D-04107 Leipzig, Germany.

Determining the function of a non-coding RNA requires costly and time-consuming

wet-lab experiments. For this reason, computational methods which ascertain the

homology of a sequence and thereby deduce functionality and family membership are

often exploited. In this fashion, newly sequenced genomes can be annotated in a

completely computational way. Covariance models are commonly used to assign novel

RNA sequences to a known RNA family. However, to construct such models several

examples of the family have to be already known. Moreover, model building is the

work of experts who manually edit the necessary RNA alignment and consensus

structure. Our method, RNAlien, starting from a single input sequence collects

potential family member sequences by multiple iterations of homology search. RNA

family models are fully automatically constructed for the found sequences. We

have tested our method on a subset of the Rfam RNA family database. RNAlien

models are a starting point to construct models of comparable sensitivity and

specificity to manually curated ones from the Rfam database. RNAlien Tool and web

server are available at http://rna.tbi.univie.ac.at/rnalien/.

© The Author(s) 2016. Published by Oxford University Press on behalf of Nucleic

Acids Research.

DOI: 10.1093/nar/gkw558

PMCID: PMC5041467

PMID: 27330139

105. J Chem Inf Model. 2016 Sep 26;56(9):1615-21. doi: 10.1021/acs.jcim.6b00397. Epub

2016 Aug 19.

Connection Map for Compounds (CMC): A Server for Combinatorial Drug Toxicity and

Efficacy Analysis.

Liu L(1), Tsompana M(2), Wang Y(3), Wu D(1), Zhu L(4,)(5,)(6), Zhu R(1).

Author information:

(1)Department of Bioinformatics, School of Life Sciences and Technology, Tongji

University , Shanghai 200092, People's Repubic of China. (2)Center of Excellence

in Bioinformatics and Life Sciences, the State University of New York at Buffalo

, Buffalo, New York 14203, United States. (3)Basic Medical College, Beijing

University of Chinese Medicine , Beijing 100029, People's Republic of China.

(4)Digestive Diseases and Nutrition Center, Department of Pediatrics, The State

University of New York at Buffalo , Buffalo, New York 14260, United States.

(5)Genome, Environment, and Microbiome Community of Excellence, The State

University of New York at Buffalo , Buffalo, New York 14214, United States.

(6)Institute of Digestive Diseases, Longhua Hospital, Shanghai University of

Traditional Chinese Medicine , Shanghai 200032, People's Republic of China.

Drug discovery and development is a costly and time-consuming process with a high

risk for failure resulting primarily from a drug's associated clinical safety and

efficacy potential. Identifying and eliminating inapt candidate drugs as early as

possible is an effective way for reducing unnecessary costs, but limited

analytical tools are currently available for this purpose. Recent growth in the

area of toxicogenomics and pharmacogenomics has provided with a vast amount of

drug expression microarray data. Web servers such as CMap and LTMap have used

this information to evaluate drug toxicity and mechanisms of action

independently; however, their wider applicability has been limited by the lack of

a combinatorial drug-safety type of analysis. Using available genome-wide drug

transcriptional expression profiles, we developed the first web server for

combinatorial evaluation of toxicity and efficacy of candidate drugs named

"Connection Map for Compounds" (CMC). Using CMC, researchers can initially

compare their query drug gene signatures with prebuilt gene profiles generated

from two large-scale toxicogenomics databases, and subsequently perform a drug

efficacy analysis for identification of known mechanisms of drug action or

generation of new predictions. CMC provides a novel approach for drug

repositioning and early evaluation in drug discovery with its unique combination

of toxicity and efficacy analyses, expansibility of data and algorithms, and

customization of reference gene profiles. CMC can be freely accessed at

http://cadd.tongji.edu.cn/webserver/CMCbp.jsp .

DOI: 10.1021/acs.jcim.6b00397

PMID: 27508329

106. PLoS One. 2016 Sep 23;11(9):e0163274. doi: 10.1371/journal.pone.0163274.

Sequence Based Prediction of Antioxidant Proteins Using a Classifier Selection

Strategy.

Zhang L(1), Zhang C(1,)(2), Gao R(1), Yang R(1), Song Q(3).

Author information:

(1)School of Control Science and Engineering, Shandong University, Jinan, China.

(2)School of Mechanical, Electrical and Information Engineering, Shandong

University at Weihai, China. (3)School of Electrical Engineering, University of

Jinan, Jinan, China.

Antioxidant proteins perform significant functions in maintaining

oxidation/antioxidation balance and have potential therapies for some diseases.

Accurate identification of antioxidant proteins could contribute to revealing

physiological processes of oxidation/antioxidation balance and developing novel

antioxidation-based drugs. In this study, an ensemble method is presented to

predict antioxidant proteins with hybrid features, incorporating SSI (Secondary

Structure Information), PSSM (Position Specific Scoring Matrix), RSA (Relative

Solvent Accessibility), and CTD (Composition, Transition, Distribution). The

prediction results of the ensemble predictor are determined by an average of

prediction results of multiple base classifiers. Based on a classifier selection

strategy, we obtain an optimal ensemble classifier composed of RF (Random

Forest), SMO (Sequential Minimal Optimization), NNA (Nearest Neighbor Algorithm),

and J48 with an accuracy of 0.925. A Relief combined with IFS (Incremental

Feature Selection) method is adopted to obtain optimal features from hybrid

features. With the optimal features, the ensemble method achieves improved

performance with a sensitivity of 0.95, a specificity of 0.93, an accuracy of

0.94, and an MCC (Matthew's Correlation Coefficient) of 0.880, far better than

the existing method. To evaluate the prediction performance objectively, the

proposed method is compared with existing methods on the same independent testing

dataset. Encouragingly, our method performs better than previous studies. In

addition, our method achieves more balanced performance with a sensitivity of

0.878 and a specificity of 0.860. These results suggest that the proposed

ensemble method can be a potential candidate for antioxidant protein prediction.

For public access, we develop a user-friendly web server for antioxidant protein

identification that is freely accessible at http://antioxidant.weka.cc.

DOI: 10.1371/journal.pone.0163274

PMCID: PMC5035026

PMID: 27662651

Conflict of interest statement: The authors have declared that no competing

interests exist.

107. PLoS One. 2016 Sep 22;11(9):e0163454. doi: 10.1371/journal.pone.0163454.

VfoldCPX Server: Predicting RNA-RNA Complex Structure and Stability.

Xu X(1), Chen SJ(1,)(2,)(3).

Author information:

(1)Department of Physics, University of Missouri, Columbia, MO 65211, United

States of America. (2)Department of Biochemistry, University of Missouri,

Columbia, MO 65211, United States of America. (3)MU Informatics Institute,

University of Missouri, Columbia, MO 65211, United States of America.

RNA-RNA interactions are essential for genomic RNA dimerization, mRNA splicing,

and many RNA-related gene expression and regulation processes. The prediction of

the structure and folding stability of RNA-RNA complexes is a problem of

significant biological importance and receives substantial interest in the

biological community. The VfoldCPX server provides a new web interface to predict

the two-dimensional (2D) structures of RNA-RNA complexes from the nucleotide

sequences. The VfoldCPX server has several novel advantages including the ability

to treat RNAs with tertiary contacts (crossing base pairs) such as loop-loop

kissing interactions and the use of physical loop entropy parameters. Based on a

partition function-based algorithm, the server enables prediction for structure

with and without tertiary contacts. Furthermore, the server outputs a set of

energetically stable structures, ranked by their stabilities. The results allow

users to gain extensive physical insights into RNA-RNA interactions and their

roles in RNA function. The web server is freely accessible at

"http://rna.physics.missouri.edu/vfoldCPX".

DOI: 10.1371/journal.pone.0163454

PMCID: PMC5033388

PMID: 27657918

Conflict of interest statement: The authors have declared that no competing

interests exist.

108. Biol Direct. 2016 Sep 21;11(1):48.

modPDZpep: a web resource for structure based analysis of human PDZ-mediated

interaction networks.

Sain N(1), Mohanty D(2).

Author information:

(1)Bioinformatics Center, National Institute of Immunology, Aruna Asaf Ali Marg,

New Delhi, 110067, India. (2)Bioinformatics Center, National Institute of

Immunology, Aruna Asaf Ali Marg, New Delhi, 110067, India. deb@nii.res.in.

BACKGROUND: PDZ domains recognize short sequence stretches usually present in

C-terminal of their interaction partners. Because of the involvement of PDZ

domains in many important biological processes, several attempts have been made

for developing bioinformatics tools for genome-wide identification of PDZ

interaction networks. Currently available tools for prediction of interaction

partners of PDZ domains utilize machine learning approach. Since, they have been

trained using experimental substrate specificity data for specific PDZ families,

their applicability is limited to PDZ families closely related to the training

set. These tools also do not allow analysis of PDZ-peptide interaction

interfaces.

RESULTS: We have used a structure based approach to develop modPDZpep, a program

to predict the interaction partners of human PDZ domains and analyze structural

details of PDZ interaction interfaces. modPDZpep predicts interaction partners by

using structural models of PDZ-peptide complexes and evaluating binding energy

scores using residue based statistical pair potentials. Since, it does not

require training using experimental data on peptide binding affinity, it can

predict substrates for diverse PDZ families. Because of the use of simple scoring

function for binding energy, it is also fast enough for genome scale structure

based analysis of PDZ interaction networks. Benchmarking using artificial as well

as real negative datasets indicates good predictive power with ROC-AUC values in

the range of 0.7 to 0.9 for a large number of human PDZ domains. Another novel

feature of modPDZpep is its ability to map novel PDZ mediated interactions in

human protein-protein interaction networks, either by utilizing available

experimental phage display data or by structure based predictions.

CONCLUSIONS: In summary, we have developed modPDZpep, a web-server for structure

based analysis of human PDZ domains. It is freely available at

http://www.nii.ac.in/modPDZpep.html or http://202.54.226.235/modPDZpep.html .

REVIEWERS: This article was reviewed by Michael Gromiha and Zoltán Gáspári.

DOI: 10.1186/s13062-016-0151-4

PMCID: PMC5031328

PMID: 27655048

109. Bioinformatics. 2016 Sep 15;32(18):2850-2. doi: 10.1093/bioinformatics/btw238.

Epub 2016 Jun 6.

MetalPredator: a web server to predict iron-sulfur cluster binding proteomes.

Valasatava Y(1), Rosato A(2), Banci L(2), Andreini C(2).

Author information:

(1)Magnetic Resonance Center (CERM). (2)Magnetic Resonance Center (CERM)

Department of Chemistry, University of Florence, 50019 Sesto Fiorentino, Italy.

MOTIVATION: The prediction of the iron-sulfur proteome is highly desirable for

biomedical and biological research but a freely available tool to predict

iron-sulfur proteins has not been developed yet.

RESULTS: We developed a web server to predict iron-sulfur proteins from protein

sequence(s). This tool, called MetalPredator, is able to process complete

proteomes rapidly with high recall and precision.

AVAILABILITY AND IMPLEMENTATION: The web server is freely available at:

http://metalweb.cerm.unifi.it/tools/metalpredator/

CONTACT: andreini@cerm.unifi.it

SUPPLEMENTARY INFORMATION: Supplementary data are available at Bioinformatics

online.

© The Author 2016. Published by Oxford University Press. All rights reserved. For

Permissions, please e-mail: journals.permissions@oup.com.

DOI: 10.1093/bioinformatics/btw238

PMID: 27273670

110. Bioinformatics. 2016 Sep 15;32(18):2853-5. doi: 10.1093/bioinformatics/btw315.

Epub 2016 Jun 3.

DBSI server: DNA binding site identifier.

Sukumar S(1), Zhu X(2), Ericksen SS(3), Mitchell JC(4).

Author information:

(1)Department of Biochemistry, University of Wisconsin-Madison, Madison, WI

53706, USA. (2)School of Life Sciences, Anhui University, Hefei, Anhui Province

230601, China. (3)Small Molecule Screening Facility. (4)Department of

Biochemistry, University of Wisconsin-Madison, Madison, WI 53706, USA Department

of Mathematics, University of Wisconsin-Madison, Madison, WI 53706, USA.

: Protein-nucleic acid interactions are among the most important intermolecular

interactions in the regulation of cellular events. Identifying residues involved

in these interactions from protein structure alone is an important challenge.

Here we introduce the webserver interface to DNA Binding Site Identifier (DBSI),

a powerful structure-based SVM model for the prediction and visualization of DNA

binding sites on protein structures. DBSI has been shown to be a top-performing

model to predict DNA binding sites on the surface of a protein or peptide and

shows promise in predicting RNA binding sites.AVAILABILITY AND IMPLEMENTATION:

Server is available at http://dbsi.mitchell-lab.org

CONTACT: jcmitchell@wisc.edu

SUPPLEMENTARY INFORMATION: Supplementary data are available at Bioinformatics

online.

© The Author 2016. Published by Oxford University Press. All rights reserved. For

Permissions, please e-mail: journals.permissions@oup.com.

DOI: 10.1093/bioinformatics/btw315

PMID: 27259543

111. PLoS One. 2016 Sep 15;11(9):e0162442. doi: 10.1371/journal.pone.0162442.

eCollection 2016.

MetaStorm: A Public Resource for Customizable Metagenomics Annotation.

Arango-Argoty G(1), Singh G(2), Heath LS(1), Pruden A(3), Xiao W(4), Zhang L(1).

Author information:

(1)Department of Computer Science, Virginia Tech, Blacksburg, Virginia, United

States of America. (2)Department of Civil Engineering, Indian Institute of

Technology Roorkee, Roorkee, Uttarakhand, India. (3)Department of Civil and

Environmental Engineering, Virginia Tech, Blacksburg, Virginia, United States of

America. (4)Department of Microbiology and Immunology, Temple University School

of Medicine, Philadelphia, United States of America.

Metagenomics is a trending research area, calling for the need to analyze large

quantities of data generated from next generation DNA sequencing technologies.

The need to store, retrieve, analyze, share, and visualize such data challenges

current online computational systems. Interpretation and annotation of specific

information is especially a challenge for metagenomic data sets derived from

environmental samples, because current annotation systems only offer broad

classification of microbial diversity and function. Moreover, existing resources

are not configured to readily address common questions relevant to environmental

systems. Here we developed a new online user-friendly metagenomic analysis server

called MetaStorm (http://bench.cs.vt.edu/MetaStorm/), which facilitates

customization of computational analysis for metagenomic data sets. Users can

upload their own reference databases to tailor the metagenomics annotation to

focus on various taxonomic and functional gene markers of interest. MetaStorm

offers two major analysis pipelines: an assembly-based annotation pipeline and

the standard read annotation pipeline used by existing web servers. These

pipelines can be selected individually or together. Overall, MetaStorm provides

enhanced interactive visualization to allow researchers to explore and manipulate

taxonomy and functional annotation at various levels of resolution.

DOI: 10.1371/journal.pone.0162442

PMCID: PMC5025195

PMID: 27632579

Conflict of interest statement: The authors have declared that no competing

interests exist.

112. BMC Genomics. 2016 Sep 9;17(1):722. doi: 10.1186/s12864-016-3057-8.

Mergeomics: a web server for identifying pathological pathways, networks, and key

regulators via multidimensional data integration.

Arneson D(1), Bhattacharya A(1), Shu L(1), Mäkinen VP(2,)(3,)(4), Yang X(5).

Author information:

(1)Department of Integrative Biology and Physiology, University of California,

Los Angeles, CA, 90095, USA. (2)South Australian Health and Medical Research

Institute, Adelaide, Australia. (3)School of Biological Sciences, University of

Adelaide, Adelaide, Australia. (4)Institute of Health Sciences, University of

Oulu, Oulu, Finland. (5)Department of Integrative Biology and Physiology,

University of California, Los Angeles, CA, 90095, USA. xyang123@ucla.edu.

BACKGROUND: Human diseases are commonly the result of multidimensional changes at

molecular, cellular, and systemic levels. Recent advances in genomic technologies

have enabled an outpour of omics datasets that capture these changes. However,

separate analyses of these various data only provide fragmented understanding and

do not capture the holistic view of disease mechanisms. To meet the urgent needs

for tools that effectively integrate multiple types of omics data to derive

biological insights, we have developed Mergeomics, a computational pipeline that

integrates multidimensional disease association data with functional genomics and

molecular networks to retrieve biological pathways, gene networks, and central

regulators critical for disease development.

RESULTS: To make the Mergeomics pipeline available to a wider research community,

we have implemented an online, user-friendly web server ( http://mergeomics.

RESEARCH: idre.ucla.edu/ ). The web server features a modular implementation of

the Mergeomics pipeline with detailed tutorials. Additionally, it provides

curated genomic resources including tissue-specific expression quantitative trait

loci, ENCODE functional annotations, biological pathways, and molecular networks,

and offers interactive visualization of analytical results. Multiple

computational tools including Marker Dependency Filtering (MDF), Marker Set

Enrichment Analysis (MSEA), Meta-MSEA, and Weighted Key Driver Analysis (wKDA)

can be used separately or in flexible combinations. User-defined summary-level

genomic association datasets (e.g., genetic, transcriptomic, epigenomic) related

to a particular disease or phenotype can be uploaded and computed real-time to

yield biologically interpretable results, which can be viewed online and

downloaded for later use.

CONCLUSIONS: Our Mergeomics web server offers researchers flexible and

user-friendly tools to facilitate integration of multidimensional data into

holistic views of disease mechanisms in the form of tissue-specific key

regulators, biological pathways, and gene networks.

DOI: 10.1186/s12864-016-3057-8

PMCID: PMC5016927

PMID: 27612452

113. Curr Protoc Bioinformatics. 2016 Sep 7;55:12.14.1-12.14.18. doi: 10.1002/cpbi.12.

DIANA-TarBase and DIANA Suite Tools: Studying Experimentally Supported microRNA

Targets.

Paraskevopoulou MD(1,)(2), Vlachos IS(1,)(2), Hatzigeorgiou AG(1,)(2).

Author information:

(1)DIANA-Lab, Department of Electrical & Computer Engineering, University of

Thessaly, Volos, Greece. (2)Hellenic Pasteur Institute, Athens, Greece.

microRNAs (miRNAs) are short non-coding RNAs (∼22 nts) present in animals,

plants, and viruses. They are considered central post-transcriptional regulators

of gene expression and are key components in a great number of physiological and

pathological conditions. The accurate characterization of their targets is

considered essential to a series of applications and basic or applied research

settings. DIANA-TarBase (http://www.microrna.gr/tarbase) was initially launched

in 2006. It is a reference repository indexing experimentally derived miRNA-gene

interactions in different cell types, tissues, and conditions across numerous

species. This unit focuses on the study of experimentally supported miRNA-gene

interactions, as well as their functional interpretation through the use of

available tools in the DIANA suite (http://www.microrna.gr). The proposed

use-case scenarios are presented in protocols, describing how to utilize the

DIANA-TarBase database and DIANA-microT-CDS server and perform miRNA-targeted

pathway analysis with DIANA-miRPath-v3. All analyses are directly invoked or

initiated from DIANA-TarBase. © 2016 by John Wiley & Sons, Inc.

Copyright © 2016 John Wiley & Sons, Inc.

DOI: 10.1002/cpbi.12

PMID: 27603020

114. J Theor Biol. 2016 Sep 7;404:285-94. doi: 10.1016/j.jtbi.2016.06.013. Epub 2016

Jun 11.

A computational approach for prediction of donor splice sites with improved

accuracy.

Meher PK(1), Sahu TK(2), Rao AR(3), Wahi SD(4).

Author information:

(1)ICAR-Indian Agricultural Statistics Research Institute, New Delhi 110012,

India. Electronic address: meherprabin@yahoo.com. (2)ICAR-Indian Agricultural

Statistics Research Institute, New Delhi 110012, India. Electronic address:

tanmayabioinfo@gmail.com. (3)ICAR-Indian Agricultural Statistics Research

Institute, New Delhi 110012, India. Electronic address: rao.cshl.work@gmail.com.

(4)ICAR-Indian Agricultural Statistics Research Institute, New Delhi 110012,

India. Electronic address: sdwahi@iasri.res.in.

Identification of splice sites is important due to their key role in predicting

the exon-intron structure of protein coding genes. Though several approaches have

been developed for the prediction of splice sites, further improvement in the

prediction accuracy will help predict gene structure more accurately. This paper

presents a computational approach for prediction of donor splice sites with

higher accuracy. In this approach, true and false splice sites were first encoded

into numeric vectors and then used as input in artificial neural network (ANN),

support vector machine (SVM) and random forest (RF) for prediction. ANN and SVM

were found to perform equally and better than RF, while tested on HS3D and NN269

datasets. Further, the performance of ANN, SVM and RF were analyzed by using an

independent test set of 50 genes and found that the prediction accuracy of ANN

was higher than that of SVM and RF. All the predictors achieved higher accuracy

while compared with the existing methods like NNsplice, MEM, MDD, WMM, MM1,

FSPLICE, GeneID and ASSP, using the independent test set. We have also developed

an online prediction server (PreDOSS) available at

http://cabgrid.res.in:8080/predoss, for prediction of donor splice sites using

the proposed approach.

Copyright © 2016 Elsevier Ltd. All rights reserved.

DOI: 10.1016/j.jtbi.2016.06.013

PMID: 27302911

115. Biochim Biophys Acta. 2016 Sep;1864(9):1104-9. doi: 10.1016/j.bbapap.2016.06.001.

Epub 2016 Jun 2.

Prediction of change in protein unfolding rates upon point mutations in two state

proteins.

Chaudhary P(1), Naganathan AN(1), Gromiha MM(2).

Author information:

(1)Department of Biotechnology, Bhupat & Jyoti Mehta School of Biosciences,

Indian Institute of Technology Madras, Chennai 600 036, Tamil Nadu, India.

(2)Department of Biotechnology, Bhupat & Jyoti Mehta School of Biosciences,

Indian Institute of Technology Madras, Chennai 600 036, Tamil Nadu, India.

Electronic address: gromiha@iitm.ac.in.

Studies on protein unfolding rates are limited and challenging due to the

complexity of unfolding mechanism and the larger dynamic range of the

experimental data. Though attempts have been made to predict unfolding rates

using protein sequence-structure information there is no available method for

predicting the unfolding rates of proteins upon specific point mutations. In this

work, we have systematically analyzed a set of 790 single mutants and developed a

robust method for predicting protein unfolding rates upon mutations (Δlnku) in

two-state proteins by combining amino acid properties and knowledge-based

classification of mutants with multiple linear regression technique. We obtain a

mean absolute error (MAE) of 0.79/s and a Pearson correlation coefficient (PCC)

of 0.71 between predicted unfolding rates and experimental observations using

jack-knife test. We have developed a web server for predicting protein unfolding

rates upon mutation and it is freely available at

https://www.iitm.ac.in/bioinfo/proteinunfolding/unfoldingrace.html. Prominent

features that determine unfolding kinetics as well as plausible reasons for the

observed outliers are also discussed.

Copyright © 2016 Elsevier B.V. All rights reserved.

DOI: 10.1016/j.bbapap.2016.06.001

PMID: 27264959

116. Bioinformatics. 2016 Sep 1;32(17):2710-2. doi: 10.1093/bioinformatics/btw301.

Epub 2016 May 13.

PRESS: PRotEin S-Sulfenylation server.

Sakka M(1), Tzortzis G(2), Mantzaris MD(3), Bekas N(1), Kellici TF(1), Likas

A(2), Galaris D(3), Gerothanassis IP(1), Tzakos AG(1).

Author information:

(1)Department of Chemistry. (2)Department of Computer Science and Engineering.

(3)Laboratory of Biological Chemistry Faculty of Medicine, University of

Ioannina, Ioannina, Greece.

MOTIVATION: Transient S-sulfenylation of cysteine thiols mediated by reactive

oxygen species plays a critical role in pathology, physiology and cell signaling.

Therefore, discovery of new S-sulfenylated sites in proteins is of great

importance towards understanding how protein function is regulated upon redox

conditions.

RESULTS: We developed PRESS (PRotEin S-Sulfenylation) web server, a server which

can effectively predict the cysteine thiols of a protein that could undergo

S-sulfenylation under redox conditions. We envisage that this server will boost

and facilitate the discovery of new and currently unknown functions of proteins

triggered upon redox conditions, signal regulation and transduction, thus

uncovering the role of S-sulfenylation in human health and disease.

AVAILABILITY AND IMPLEMENTATION: The PRESS web server is freely available at

http://press-sulfenylation.cse.uoi.gr/

CONTACTS: agtzakos@gmail.com or gtzortzi@cs.uoi.gr

SUPPLEMENTARY INFORMATION: Supplementary data are available at Bioinformatics

online.

© The Author 2016. Published by Oxford University Press. All rights reserved. For

Permissions, please e-mail: journals.permissions@oup.com.

DOI: 10.1093/bioinformatics/btw301

PMID: 27187205

117. J Biomol Struct Dyn. 2016 Sep;34(9):1946-61. doi: 10.1080/07391102.2015.1095116.

Epub 2015 Oct 29.

Identification of protein-protein binding sites by incorporating the

physicochemical properties and stationary wavelet transforms into pseudo amino

acid composition.

Jia J(1), Liu Z(1), Xiao X(1,)(2), Liu B(1), Chou KC(3,)(2).

Author information:

(1)a Computer Department , Jing-De-Zhen Ceramic Institute , Jing-De-Zhen 333403 ,

China. (2)c Gordon Life Science Institute , Boston , MA 02478 , USA. (3)b Center

of Excellence in Genomic Medicine Research (CEGMR) , King Abdulaziz University ,

Jeddah 21589 , Saudi Arabia.

With the explosive growth of protein sequences entering into protein data banks

in the post-genomic era, it is highly demanded to develop automated methods for

rapidly and effectively identifying the protein-protein binding sites (PPBSs)

based on the sequence information alone. To address this problem, we proposed a

predictor called iPPBS-PseAAC, in which each amino acid residue site of the

proteins concerned was treated as a 15-tuple peptide segment generated by sliding

a window along the protein chains with its center aligned with the target

residue. The working peptide segment is further formulated by a general form of

pseudo amino acid composition via the following procedures: (1) it is converted

into a numerical series via the physicochemical properties of amino acids; (2)

the numerical series is subsequently converted into a 20-D feature vector by

means of the stationary wavelet transform technique. Formed by many individual

"Random Forest" classifiers, the operation engine to run prediction is a

two-layer ensemble classifier, with the 1st-layer voting out the best training

data-set from many bootstrap systems and the 2nd-layer voting out the most

relevant one from seven physicochemical properties. Cross-validation tests

indicate that the new predictor is very promising, meaning that many important

key features, which are deeply hidden in complicated protein sequences, can be

extracted via the wavelets transform approach, quite consistent with the facts

that many important biological functions of proteins can be elucidated with their

low-frequency internal motions. The web server of iPPBS-PseAAC is accessible at

http://www.jci-bioinfo.cn/iPPBS-PseAAC , by which users can easily acquire their

desired results without the need to follow the complicated mathematical equations

involved.

DOI: 10.1080/07391102.2015.1095116

PMID: 26375780 [Indexed for MEDLINE]

118. J Radiol Prot. 2016 Sep;36(3):561-578. Epub 2016 Jul 27.

InterCardioRisk: a novel online tool for estimating doses of ionising radiation

to occupationally-exposed medical staff and their associated health risks.

Moriña D(1), Grellier J, Carnicer A, Pernot E, Ryckx N, Cardis E.

Author information:

(1)ISGlobal, Centre for Research in Environmental Epidemiology (CREAL),

Barcelona, Spain. Universitat Pompeu Fabra (UPF), Barcelona, Spain. CIBER

Epidemiología y Salud Pública (CIBERESP), Barcelona, Spain. Unit of Infections

and Cancer (UNIC), Cancer Epidemiology Research Program (CERP), Catalan Institute

of Oncology (ICO)-IDIBELL, L'Hospitalet de Llobregat, Barcelona, Spain. Grups de

Recerca d'Àfrica i Amèrica Llatines (GRAAL)-Unitat de Bioestadística, Facultat de

Medicina, Universitat Autònoma de Barcelona, Bellaterra 08193, Spain.

Those working in interventional cardiology and related medical procedures are

potentially subject to considerable exposure to x-rays. Two types of tissue of

particular concern that may receive considerable doses during such procedures are

the lens of the eye and the brain. Ocular radiation exposure results in lens

changes that, with time, may progress to partial or total lens opacification

(cataracts). In the early stages, such opacities do not result in visual

disability; the severity of such changes tends to increase progressively with

dose and time until vision is impaired and cataract surgery is required.

Scattered radiation doses to the eye lens of an interventional cardiologist in

typical working conditions can exceed 34 μGy min(-1) in high-dose fluoroscopy

modes and 3 μGy per image during image acquisition (instantaneous rate values)

when radiation protection tools are not used. A causal relation between exposure

to ionising radiation and increased risk of brain and central nervous system

tumours has been shown in a number of studies. Although absorbed doses to the

brain in interventional cardiology procedures are lower than those to the eye

lens by a factor between 3.40 and 8.08 according to our simulations, doses to

both tissues are among the highest occupational radiation doses documented for

medical staff whose work involves exposures to x-rays. We present

InterCardioRisk, a tool featuring an easy-to-use web interface that provides a

general estimation of both cumulated absorbed doses experienced by medical staff

exposed in the interventional cardiology setting and their estimated associated

health risks. The tool is available at http://intercardiorisk.creal.cat.

DOI: 10.1088/0952-4746/36/3/561

PMID: 27460876

119. Methods. 2016 Sep 1;107:34-41. doi: 10.1016/j.ymeth.2016.03.013. Epub 2016 Mar

23.

tRNAmodpred: A computational method for predicting posttranscriptional

modifications in tRNAs.

Machnicka MA(1), Dunin-Horkawicz S(1), de Crécy-Lagard V(2), Bujnicki JM(3).

Author information:

(1)Laboratory of Bioinformatics and Protein Engineering, International Institute

of Molecular and Cell Biology, ul. Ks. Trojdena 4, 02-109 Warsaw, Poland.

(2)Department of Microbiology and Cell Science, University Florida, Gainesville,

FL, USA. (3)Laboratory of Bioinformatics and Protein Engineering, International

Institute of Molecular and Cell Biology, ul. Ks. Trojdena 4, 02-109 Warsaw,

Poland; Institute of Molecular Biology and Biotechnology, Adam Mickiewicz

University, Umultowska 89, PL-61-614 Poznan, Poland. Electronic address:

iamb@genesilico.pl.

tRNA molecules contain numerous chemically altered nucleosides, which are formed

by enzymatic modification of the primary transcripts during the complex tRNA

maturation process. Some of the modifications are introduced by single reactions,

while other require complex series of reactions carried out by several different

enzymes. The location and distribution of various types of modifications vary

greatly between different tRNA molecules, organisms and organelles. We have

developed a computational method tRNAmodpred, for predicting modifications in

tRNA sequences. Briefly, our method takes as an input one or more unmodified tRNA

sequences and a set of protein sequences corresponding to a proteome of a cell.

Subsequently it identifies homologs of known tRNA modification enzymes in the

proteome, predicts tRNA modification activities and maps them onto known pathways

of RNA modification from the MODOMICS database. Thereby, theoretically possible

modification pathways are identified, and products of these modification

reactions are proposed for query tRNAs. This method allows for predicting

modification patterns for newly sequenced genomes as well as for checking

tentative modification status of tRNAs from one species treated with enzymes from

another source, e.g. to predict the possible modifications of eukaryotic tRNAs

expressed in bacteria. tRNAmodpred is freely available as a web server at

http://genesilico.pl/trnamodpred/.

Copyright © 2016 The Authors. Published by Elsevier Inc. All rights reserved.

DOI: 10.1016/j.ymeth.2016.03.013

PMCID: PMC5014562 [Available on 2017-09-01]

PMID: 27016142

120. Probiotics Antimicrob Proteins. 2016 Sep;8(3):141-9. doi:

10.1007/s12602-016-9215-0.

Development of Antimicrobial Peptide Prediction Tool for Aquaculture Industries.

Gautam A(1), Sharma A(1), Jaiswal S(2), Fatma S(2), Arora V(2), Iquebal MA(2),

Nandi S(3), Sundaray JK(3), Jayasankar P(3), Rai A(2), Kumar D(4).

Author information:

(1)Jaypee University of Information Technology, Solan, Himachal Pradesh, India.

(2)Centre for Agricultural Bioinformatics, ICAR-Indian Agricultural Statistics

Research Institute, New Delhi, India. (3)Division of Fish Genetics and

Biotechnology, ICAR-Central Institute of Freshwater Aquaculture, Bhubaneswar,

Odisha, India. (4)Centre for Agricultural Bioinformatics, ICAR-Indian

Agricultural Statistics Research Institute, New Delhi, India.

dineshkumarbhu@gmail.com.

Microbial diseases in fish, plant, animal and human are rising constantly; thus,

discovery of their antidote is imperative. The use of antibiotic in aquaculture

further compounds the problem by development of resistance and consequent

consumer health risk by bio-magnification. Antimicrobial peptides (AMPs) have

been highly promising as natural alternative to chemical antibiotics. Though AMPs

are molecules of innate immune defense of all advance eukaryotic organisms, fish

being heavily dependent on their innate immune defense has been a good source of

AMPs with much wider applicability. Machine learning-based prediction method

using wet laboratory-validated fish AMP can accelerate the AMP discovery using

available fish genomic and proteomic data. Earlier AMP prediction servers are

based on multi-phyla/species data, and we report here the world's first AMP

prediction server in fishes. It is freely accessible at

http://webapp.cabgrid.res.in/fishamp/ . A total of 151 AMPs related to fish

collected from various databases and published literature were taken for this

study. For model development and prediction, N-terminus residues, C-terminus

residues and full sequences were considered. Best models were with kernels

polynomial-2, linear and radial basis function with accuracy of 97, 99 and 97 %,

respectively. We found that performance of support vector machine-based models is

superior to artificial neural network. This in silico approach can drastically

reduce the time and cost of AMP discovery. This accelerated discovery of lead AMP

molecules having potential wider applications in diverse area like fish and human

health as substitute of antibiotics, immunomodulator, antitumor, vaccine adjuvant

and inactivator, and also for packaged food can be of much importance for

industries.

DOI: 10.1007/s12602-016-9215-0

PMID: 27141850

121. Sci Rep. 2016 Sep 1;6:32333. doi: 10.1038/srep32333.

dRHP-PseRA: detecting remote homology proteins using profile-based pseudo protein

sequence and rank aggregation.

Chen J(1), Long R(1), Wang XL(1,)(2), Liu B(1,)(2,)(3), Chou KC(3,)(4).

Author information:

(1)School of Computer Science and Technology, Harbin Institute of Technology

Shenzhen Graduate School, Shenzhen, Guangdong 518055, China. (2)Key Laboratory of

Network Oriented Intelligent Computation, Harbin Institute of Technology Shenzhen

Graduate School, Shenzhen, Guangdong 518055, China. (3)Gordon Life Science

Institute, Boston, MA 02478, USA. (4)Center of Excellence in Genomic Medicine

Research (CEGMR), King Abdulaziz University, Jeddah 21589, Saudi Arabia.

Protein remote homology detection is an important task in computational

proteomics. Some computational methods have been proposed, which detect remote

homology proteins based on different features and algorithms. As noted in

previous studies, their predictive results are complementary to each other.

Therefore, it is intriguing to explore whether these methods can be combined into

one package so as to further enhance the performance power and application

convenience. In view of this, we introduced a protein representation called

profile-based pseudo protein sequence to extract the evolutionary information

from the relevant profiles. Based on the concept of pseudo proteins, a new

predictor, called "dRHP-PseRA", was developed by combining four state-of-the-art

predictors (PSI-BLAST, HHblits, Hmmer, and Coma) via the rank aggregation

approach. Cross-validation tests on a SCOP benchmark dataset have demonstrated

that the new predictor has remarkably outperformed any of the existing methods

for the same purpose on ROC50 scores. Accordingly, it is anticipated that

dRHP-PseRA holds very high potential to become a useful high throughput tool for

detecting remote homology proteins. For the convenience of most experimental

scientists, a web-server for dRHP-PseRA has been established at

http://bioinformatics.hitsz.edu.cn/dRHP-PseRA/.

DOI: 10.1038/srep32333

PMCID: PMC5007510

PMID: 27581095

122. BMC Genomics. 2016 Aug 26;17:681. doi: 10.1186/s12864-016-3028-0.

G23D: Online tool for mapping and visualization of genomic variants on 3D protein

structures.

Solomon O(1,)(2), Kunik V(1), Simon A(3), Kol N(1), Barel O(1), Lev A(3),

Amariglio N(1,)(2), Somech R(4,)(5), Rechavi G(1,)(5), Eyal E(6).

Author information:

(1)Cancer Research Center, Sheba Medical Center, Ramat-Gan, Israel. (2)The Mina

and Everard Goodman Faculty of Life Sciences, Bar-Ilan University, Ramat-Gan,

Israel. (3)Pediatric Immunology Service, Jeffrey Modell Foundation, Sheba Medical

Center, Ramat-Gan, Israel. (4)Edmond and Lily Safra Children's Hospital, Sheba

Medical Center, Ramat-Gan, Israel. (5)Sackler School of Medicine, Tel Aviv

University, Tel Aviv, Israel. (6)Cancer Research Center, Sheba Medical Center,

Ramat-Gan, Israel. eran.eyal@sheba.health.gov.il.

BACKGROUND: Evaluation of the possible implications of genomic variants is an

increasingly important task in the current high throughput sequencing era.

Structural information however is still not routinely exploited during this

evaluation process. The main reasons can be attributed to the partial structural

coverage of the human proteome and the lack of tools which conveniently convert

genomic positions, which are the frequent output of genomic pipelines, to

proteins and structure coordinates.

RESULTS: We present G23D, a tool for conversion of human genomic coordinates to

protein coordinates and protein structures. G23D allows mapping of genomic

positions/variants on evolutionary related (and not only identical) protein three

dimensional (3D) structures as well as on theoretical models. By doing so it

significantly extends the space of variants for which structural insight is

feasible. To facilitate interpretation of the variant consequence, pathogenic

variants, functional sites and polymorphism sites are displayed on protein

sequence and structure diagrams alongside the input variants. G23D also provides

modeling of the mutant structure, analysis of intra-protein contacts and instant

access to functional predictions and predictions of thermo-stability changes.

G23D is available at http://www.sheba-cancer.org.il/G23D .

CONCLUSIONS: G23D extends the fraction of variants for which structural analysis

is applicable and provides better and faster accessibility for structural data to

biologists and geneticists who routinely work with genomic information.

DOI: 10.1186/s12864-016-3028-0

PMCID: PMC5002099

PMID: 27565432

123. J Cheminform. 2016 Aug 26;8(1):42. doi: 10.1186/s13321-016-0155-1. eCollection

2016.

Molmil: a molecular viewer for the PDB and beyond.

Bekker GJ(1), Nakamura H(2), Kinjo AR(2).

Author information:

(1)Laboratory of Protein Informatics, Institute for Protein Research, Osaka

University, 3-2 Yamadaoka, Suita, Osaka 565-0871 Japan ; Graduate School of

Frontier Biosciences, Osaka University, Suita, Osaka 565-0871 Japan.

(2)Laboratory of Protein Informatics, Institute for Protein Research, Osaka

University, 3-2 Yamadaoka, Suita, Osaka 565-0871 Japan.

We have developed a new platform-independent web-based molecular viewer using

JavaScript and WebGL. The molecular viewer, Molmil, has been integrated into

several services offered by Protein Data Bank Japan and can be easily extended

with new functionality by third party developers. Furthermore, the viewer can be

used to load files in various formats from the user's local hard drive without

uploading the data to a server. Molmil is available for all platforms supporting

WebGL (e.g. Windows, Linux, iOS, Android) from http://gjbekker.github.io/molmil/.

The source code is available at http://github.com/gjbekker/molmil under the

LGPLv3 licence.

DOI: 10.1186/s13321-016-0155-1

PMCID: PMC5002144

PMID: 27570544

124. PLoS One. 2016 Aug 25;11(8):e0160645. doi: 10.1371/journal.pone.0160645.

eCollection 2016.

aPPRove: An HMM-Based Method for Accurate Prediction of RNA-Pentatricopeptide

Repeat Protein Binding Events.

Harrison T(1), Ruiz J(2), Sloan DB(3), Ben-Hur A(1), Boucher C(2).

Author information:

(1)Department of Computer Science, Colorado State University, Fort Collins, CO,

80523, United States of America. (2)Department of Computer and Information

Science and Engineering, University of Florida, Gainesville, FL, 32611, United

States of America. (3)Department of Biology, Colorado State University, Fort

Collins, CO, 80523, United States of America.

Pentatricopeptide repeat containing proteins (PPRs) bind to RNA transcripts

originating from mitochondria and plastids. There are two classes of PPR

proteins. The [Formula: see text] class contains tandem [Formula: see text]-type

motif sequences, and the [Formula: see text] class contains alternating [Formula:

see text], [Formula: see text] and [Formula: see text] type sequences. In this

paper, we describe a novel tool that predicts PPR-RNA interaction; specifically,

our method, which we call aPPRove, determines where and how a [Formula: see

text]-class PPR protein will bind to RNA when given a PPR and one or more RNA

transcripts by using a combinatorial binding code for site specificity proposed

by Barkan et al. Our results demonstrate that aPPRove successfully locates how

and where a PPR protein belonging to the [Formula: see text] class can bind to

RNA. For each binding event it outputs the binding site, the

amino-acid-nucleotide interaction, and its statistical significance. Furthermore,

we show that our method can be used to predict binding events for [Formula: see

text]-class proteins using a known edit site and the statistical significance of

aligning the PPR protein to that site. In particular, we use our method to make a

conjecture regarding an interaction between CLB19 and the second intronic region

of ycf3. The aPPRove web server can be found at www.cs.colostate.edu/~approve.

DOI: 10.1371/journal.pone.0160645

PMCID: PMC4999063

PMID: 27560805

Conflict of interest statement: The authors have declared that no competing

interests exist.

125. Brief Bioinform. 2016 Aug 19. pii: bbw071. [Epub ahead of print]

A protein network descriptor server and its use in studying protein, disease,

metabolic and drug targeted networks.

Zhang P, Tao L, Zeng X, Qin C, Chen S, Zhu F, Li Z, Jiang Y, Chen W, Chen YZ.

The genetic, proteomic, disease and pharmacological studies have generated rich

data in protein interaction, disease regulation and drug activities useful for

systems-level study of the biological, disease and drug therapeutic processes.

These studies are facilitated by the established and the emerging computational

methods. More recently, the network descriptors developed in other disciplines

have become more increasingly used for studying the protein-protein, gene

regulation, metabolic, disease networks. There is an inadequate coverage of these

useful network features in the public web servers. We therefore introduced upto

313 literature-reported network descriptors in PROFEAT web server, for describing

the topological, connectivity and complexity characteristics of undirected

unweighted (uniform binding constants and molecular levels), undirected

edge-weighted (varying binding constants), undirected node-weighted (varying

molecular levels), undirected edge-node-weighted (varying binding constants and

molecular levels) and directed unweighted (oriented process) networks. The

usefulness of the PROFEAT computed network descriptors is illustrated by their

literature-reported applications in studying the protein-protein, gene

regulatory, gene co-expression, protein-drug and metabolic networks. PROFEAT is

accessible free of charge at

http://bidd2.nus.edu.sg/cgi-bin/profeat2016/main.cgi.

© The Author 2016. Published by Oxford University Press.

DOI: 10.1093/bib/bbw071

PMID: 27542402

126. Sci Rep. 2016 Aug 18;6:32153. doi: 10.1038/srep32153.

GalaxyRefineComplex: Refinement of protein-protein complex model structures

driven by interface repacking.

Heo L(1), Lee H(1), Seok C(1).

Author information:

(1)Department of Chemistry, Seoul National University, Seoul 08826, Republic of

Korea.

Protein-protein docking methods have been widely used to gain an atomic-level

understanding of protein interactions. However, docking methods that employ

low-resolution energy functions are popular because of computational efficiency.

Low-resolution docking tends to generate protein complex structures that are not

fully optimized. GalaxyRefineComplex takes such low-resolution docking structures

and refines them to improve model accuracy in terms of both interface contact and

inter-protein orientation. This refinement method allows flexibility at the

protein interface and in the overall docking structure to capture conformational

changes that occur upon binding. Symmetric refinement is also provided for

symmetric homo-complexes. This method was validated by refining models produced

by available docking programs, including ZDOCK and M-ZDOCK, and was successfully

applied to CAPRI targets in a blind fashion. An example of using the refinement

method with an existing docking method for ligand binding mode prediction of a

drug target is also presented. A web server that implements the method is freely

available at http://galaxy.seoklab.org/refinecomplex.

DOI: 10.1038/srep32153

PMCID: PMC4989233

PMID: 27535582

127. Bioinformatics. 2016 Aug 15;32(16):2548-50. doi: 10.1093/bioinformatics/btw208.

Epub 2016 Apr 19.

OREMPRO web server: orientation and assessment of atomistic and coarse-grained

structures of membrane proteins.

Postic G(1), Ghouzam Y(1), Gelly JC(1).

Author information:

(1)Inserm U1134, Paris, France Univ. Paris Diderot, Sorbonne Paris Cité, UMR_S

1134, Paris, France Institut National De La Transfusion Sanguine, Paris, France

Laboratory of Excellence GR-Ex, Paris, France.

: The experimental determination of membrane protein orientation within the lipid

bilayer is extremely challenging, such that computational methods are most often

the only solution. Moreover, obtaining all-atom 3D structures of membrane

proteins is also technically difficult, and many of the available data are either

experimental low-resolution structures or theoretical models, whose structural

quality needs to be evaluated. Here, to address these two crucial problems, we

propose OREMPRO, a web server capable of both (i) positioning α-helical and

β-sheet transmembrane domains in the lipid bilayer and (ii) assessing their

structural quality. Most importantly, OREMPRO uses the sole alpha carbon

coordinates, which makes it the only web server compatible with both high and low

structural resolutions. Finally, OREMPRO is also interesting in its ability to

process coarse-grained protein models, by using coordinates of backbone beads in

place of alpha carbons.AVAILABILITY AND IMPLEMENTATION:

http://www.dsimb.inserm.fr/OREMPRO/ CONTACT: :

guillaume.postic@univ-paris-diderot.fr or

jean-christophe.gelly@univ-paris-diderot.fr

SUPPLEMENTARY INFORMATION: Supplementary data are available at Bioinformatics

online.

© The Author 2016. Published by Oxford University Press. All rights reserved. For

Permissions, please e-mail: journals.permissions@oup.com.

DOI: 10.1093/bioinformatics/btw208

PMID: 27153644

128. Bioinformatics. 2016 Aug 15;32(16):2545-7. doi: 10.1093/bioinformatics/btw200.

Epub 2016 Apr 19.

Mollack: a web server for the automated creation of conformational ensembles for

intrinsically disordered proteins.

Ziegler Z(1), Schmidt M(2), Gurry T(3), Burger V(4), Stultz CM(5).

Author information:

(1)Cornell University, Ithaca, NY 14850, USA Research Laboratory of Electronics,

Massachusetts Institute of Technology, Cambridge, MA 02139-4307, USA. (2)Research

Laboratory of Electronics, Massachusetts Institute of Technology, Cambridge, MA

02139-4307, USA Department of Electrical Engineering and Computer Science,

Massachusetts Institute of Technology, Cambridge, MA 02139-4307, USA. (3)Research

Laboratory of Electronics, Massachusetts Institute of Technology, Cambridge, MA

02139-4307, USA Computational and Systems Biology Initiative, Massachusetts

Institute of Technology, Cambridge, MA 02139-4307, USA. (4)Research Laboratory of

Electronics, Massachusetts Institute of Technology, Cambridge, MA 02139-4307,

USA. (5)Research Laboratory of Electronics, Massachusetts Institute of

Technology, Cambridge, MA 02139-4307, USA Department of Electrical Engineering

and Computer Science, Massachusetts Institute of Technology, Cambridge, MA

02139-4307, USA Computational and Systems Biology Initiative, Massachusetts

Institute of Technology, Cambridge, MA 02139-4307, USA The Institute for Medical

Engineering and Science, Massachusetts Institute of Technology, Cambridge, MA

02139-4307, USA.

Intrinsically disordered proteins (IDPs) play central roles in many biological

processes. Consequently, an accurate description of the disordered state is an

important step towards a comprehensive understanding of a number of important

biological functions. In this work we describe a new web server, Mollack, for the

automated construction of unfolded ensembles that uses both experimental and

molecular simulation data to construct models for the unfolded state. An

important aspect of the method is that it calculates a quantitative estimate of

the uncertainty in the constructed ensemble, thereby providing an objective

measure of the quality of the final model. Overall, Mollack facilitates

structure-function studies of disordered proteins.AVAILABILITY AND

IMPLEMENTATION: http://cmstultz-mollack.mit.edu

CONTACT: cmstultz@mit.edu

SUPPLEMENTARY INFORMATION: Supplementary data are available at Bioinformatics

online.

© The Author 2016. Published by Oxford University Press. All rights reserved. For

Permissions, please e-mail: journals.permissions@oup.com.

DOI: 10.1093/bioinformatics/btw200

PMID: 27153636

129. Bioinformatics. 2016 Aug 15;32(16):2542-4. doi: 10.1093/bioinformatics/btw192.

Epub 2016 Apr 10.

INPS-MD: a web server to predict stability of protein variants from sequence and

structure.

Savojardo C(1), Fariselli P(2), Martelli PL(1), Casadio R(3).

Author information:

(1)Biocomputing Group, CIG, Interdepartmental Center «Luigi Galvani» for

Integrated Studies of Bioinformatics, Biophysics and Biocomplexity, University of

Bologna, Italy. (2)BCA, University of Padova, Italy. (3)Biocomputing Group, CIG,

Interdepartmental Center «Luigi Galvani» for Integrated Studies of

Bioinformatics, Biophysics and Biocomplexity, University of Bologna, Italy

Interdepartmental Center «Giorgio Prodi» for Cancer Research, University of

Bologna, Italy.

MOTIVATION: Protein function depends on its structural stability. The effects of

single point variations on protein stability can elucidate the molecular

mechanisms of human diseases and help in developing new drugs. Recently, we

introduced INPS, a method suited to predict the effect of variations on protein

stability from protein sequence and whose performance is competitive with the

available state-of-the-art tools.

RESULTS: In this article, we describe INPS-MD (Impact of Non synonymous

variations on Protein Stability-Multi-Dimension), a web server for the prediction

of protein stability changes upon single point variation from protein sequence

and/or structure. Here, we complement INPS with a new predictor (INPS3D) that

exploits features derived from protein 3D structure. INPS3D scores with Pearson's

correlation to experimental ΔΔG values of 0.58 in cross validation and of 0.72 on

a blind test set. The sequence-based INPS scores slightly lower than the

structure-based INPS3D and both on the same blind test sets well compare with the

state-of-the-art methods.

AVAILABILITY AND IMPLEMENTATION: INPS and INPS3D are available at the same web

server: http://inpsmd.biocomp.unibo.it

SUPPLEMENTARY INFORMATION: Supplementary data are available at Bioinformatics

online.

CONTACT: gigi@biocomp.unibo.it.

© The Author 2016. Published by Oxford University Press. All rights reserved. For

Permissions, please e-mail: journals.permissions@oup.com.

DOI: 10.1093/bioinformatics/btw192

PMID: 27153629

130. Bioinformatics. 2016 Aug 15;32(16):2411-8. doi: 10.1093/bioinformatics/btw186.

Epub 2016 Apr 8.

iDHS-EL: identifying DNase I hypersensitive sites by fusing three different modes

of pseudo nucleotide composition into an ensemble learning framework.

Liu B(1), Long R(2), Chou KC(3).

Author information:

(1)School of Computer Science and Technology, Harbin Institute of Technology

Shenzhen Graduate School, Shenzhen, Guangdong 518055, China Key Laboratory of

Network Oriented Intelligent Computation, Harbin Institute of Technology Shenzhen

Graduate School, Shenzhen, Guangdong 518055, China Gordon Life Science Institute,

Belmont, MA 02478, USA. (2)School of Computer Science and Technology, Harbin

Institute of Technology Shenzhen Graduate School, Shenzhen, Guangdong 518055,

China. (3)Gordon Life Science Institute, Belmont, MA 02478, USA Center of

Excellence in Genomic Medicine Research (CEGMR), King Abdulaziz University,

Jeddah 21589, Saudi Arabia.

MOTIVATION: Regulatory DNA elements are associated with DNase I hypersensitive

sites (DHSs). Accordingly, identification of DHSs will provide useful insights

for in-depth investigation into the function of noncoding genomic regions.

RESULTS: In this study, using the strategy of ensemble learning framework, we

proposed a new predictor called iDHS-EL for identifying the location of DHS in

human genome. It was formed by fusing three individual Random Forest (RF)

classifiers into an ensemble predictor. The three RF operators were respectively

based on the three special modes of the general pseudo nucleotide composition

(PseKNC): (i) kmer, (ii) reverse complement kmer and (iii) pseudo dinucleotide

composition. It has been demonstrated that the new predictor remarkably

outperforms the relevant state-of-the-art methods in both accuracy and stability.

AVAILABILITY AND IMPLEMENTATION: For the convenience of most experimental

scientists, a web server for iDHS-EL is established at

http://bioinformatics.hitsz.edu.cn/iDHS-EL, which is the first web-server

predictor ever established for identifying DHSs, and by which users can easily

get their desired results without the need to go through the mathematical

details. We anticipate that IDHS-EL: will become a very useful high throughput

tool for genome analysis.

CONTACT: bliu@gordonlifescience.org or bliu@insun.hit.edu.cn

SUPPLEMENTARY INFORMATION: Supplementary data are available at Bioinformatics

online.

© The Author 2016. Published by Oxford University Press. All rights reserved. For

Permissions, please e-mail: journals.permissions@oup.com.

DOI: 10.1093/bioinformatics/btw186

PMID: 27153623

131. Bioinformatics. 2016 Aug 15;32(16):2502-4. doi: 10.1093/bioinformatics/btw157.

Epub 2016 Apr 7.

MGEScan: a Galaxy-based system for identifying retrotransposons in genomes.

Lee H(1), Lee M(2), Mohammed Ismail W(1), Rho M(3), Fox GC(1), Oh S(4), Tang

H(1).

Author information:

(1)School of Informatics and Computing, Indiana University, Bloomington, IN, USA.

(2)Department of Computer Science and Engineering, Ewha Womans University, Seoul,

Korea. (3)Department of Computer Science and Engineering, Hanyang University,

Seoul, Korea. (4)Department of Software Convergence Technology, Ajou University,

Suwon, Korea.

: MGEScan-long terminal repeat (LTR) and MGEScan-non-LTR are successfully used

programs for identifying LTRs and non-LTR retrotransposons in eukaryotic genome

sequences. However, these programs are not supported by easy-to-use interfaces

nor well suited for data visualization in general data formats. Here, we present

MGEScan, a user-friendly system that combines these two programs with a Galaxy

workflow system accelerated with MPI and Python threading on compute clusters.

MGEScan and Galaxy empower researchers to identify transposable elements in a

graphical user interface with ready-to-use workflows. MGEScan also visualizes the

custom annotation tracks for mobile genetic elements in public genome browsers. A

maximum speed-up of 3.26× is attained for execution time using concurrent

processing and MPI on four virtual cores. MGEScan provides four operational

modes: as a command line tool, as a Galaxy Toolshed, on a Galaxy-based web

server, and on a virtual cluster on the Amazon cloud.AVAILABILITY AND

IMPLEMENTATION: MGEScan tutorials and source code are available at

http://mgescan.readthedocs.org/

CONTACT: hatang@indiana.edu or syoh@ajou.ac.kr

SUPPLEMENTARY INFORMATION: Supplementary data are available at Bioinformatics

online.

© The Author 2016. Published by Oxford University Press. All rights reserved. For

Permissions, please e-mail: journals.permissions@oup.com.

DOI: 10.1093/bioinformatics/btw157

PMID: 27153595

132. PLoS One. 2016 Aug 15;11(8):e0155290. doi: 10.1371/journal.pone.0155290.

eCollection 2016.

SVM-Prot 2016: A Web-Server for Machine Learning Prediction of Protein Functional

Families from Sequence Irrespective of Similarity.

Li YH(1), Xu JY(1,)(2), Tao L(1,)(3), Li XF(1), Li S(1), Zeng X(3), Chen SY(3),

Zhang P(3), Qin C(3), Zhang C(3), Chen Z(4), Zhu F(1), Chen YZ(3).

Author information:

(1)Innovative Drug Research and Bioinformatics Group, Innovative Drug Research

Centre and School of Pharmaceutical Sciences, Chongqing University, Chongqing,

401331, China. (2)School of Mathematics and Statistics, Beijing Institute of

Technology, Beijing, China. (3)Bioinformatics and Drug Discovery group,

Department of Pharmacy, National University of Singapore, Singapore, 117543,

Singapore. (4)Zhejiang Key Laboratory of Gastro-intestinal Pathophysiology,

Zhejiang Hospital of Traditional Chinese Medicine, Zhejiang Chinese Medical

University, Hangzhou, P. R. China.

Knowledge of protein function is important for biological, medical and

therapeutic studies, but many proteins are still unknown in function. There is a

need for more improved functional prediction methods. Our SVM-Prot web-server

employed a machine learning method for predicting protein functional families

from protein sequences irrespective of similarity, which complemented those

similarity-based and other methods in predicting diverse classes of proteins

including the distantly-related proteins and homologous proteins of different

functions. Since its publication in 2003, we made major improvements to SVM-Prot

with (1) expanded coverage from 54 to 192 functional families, (2) more diverse

protein descriptors protein representation, (3) improved predictive performances

due to the use of more enriched training datasets and more variety of protein

descriptors, (4) newly integrated BLAST analysis option for assessing proteins in

the SVM-Prot predicted functional families that were similar in sequence to a

query protein, and (5) newly added batch submission option for supporting the

classification of multiple proteins. Moreover, 2 more machine learning

approaches, K nearest neighbor and probabilistic neural networks, were added for

facilitating collective assessment of protein functions by multiple methods.

SVM-Prot can be accessed at http://bidd2.nus.edu.sg/cgi-bin/svmprot/svmprot.cgi.

DOI: 10.1371/journal.pone.0155290

PMCID: PMC4985167

PMID: 27525735

133. Biochem Biophys Res Commun. 2016 Aug 12;477(1):150-4. doi:

10.1016/j.bbrc.2016.06.035. Epub 2016 Jun 10.

Prediction of cell-penetrating peptides with feature selection techniques.

Tang H(1), Su ZD(2), Wei HH(2), Chen W(3), Lin H(4).

Author information:

(1)Department of Pathophysiology, Southwest Medical University, Luzhou 646000,

China. Electronic address: tanghua771211@aliyun.com. (2)Key Laboratory for

NeuroInformation of Ministry of Education, Center of Bioinformatics and Center

for Information in Biomedicine, School of Life Science and Technology, University

of Electronic Science and Technology of China, Chengdu 610054, China.

(3)Department of Physics, School of Sciences, Center for Genomics and

Computational Biology, North China University of Science and Technology, Tangshan

063009, China; Key Laboratory for NeuroInformation of Ministry of Education,

Center of Bioinformatics and Center for Information in Biomedicine, School of

Life Science and Technology, University of Electronic Science and Technology of

China, Chengdu 610054, China. (4)Key Laboratory for NeuroInformation of Ministry

of Education, Center of Bioinformatics and Center for Information in Biomedicine,

School of Life Science and Technology, University of Electronic Science and

Technology of China, Chengdu 610054, China. Electronic address:

hlin@uestc.edu.cn.

Cell-penetrating peptides are a group of peptides which can transport different

types of cargo molecules such as drugs across plasma membrane and have been

applied in the treatment of various diseases. Thus, the accurate prediction of

cell-penetrating peptides with bioinformatics methods will accelerate the

development of drug delivery systems. The study aims to develop a powerful model

to accurately identify cell-penetrating peptides. At first, the peptides were

translated into a set of vectors with the same dimension by using dipeptide

compositions. Secondly, the Analysis of Variance-based technique was used to

reduce the dimension of the vector and explore the optimized features. Finally,

the support vector machine was utilized to discriminate cell-penetrating peptides

from non-cell-penetrating peptides. The five-fold cross-validated results showed

that our proposed method could achieve an overall prediction accuracy of 83.6%.

Based on the proposed model, we constructed a free webserver called C2Pred

(http://lin.uestc.edu.cn/server/C2Pred).

Copyright © 2016 Elsevier Inc. All rights reserved.

DOI: 10.1016/j.bbrc.2016.06.035

PMID: 27291150

134. BMC Genomics. 2016 Aug 12;17(1):632. doi: 10.1186/s12864-016-2963-0.

iTAR: a web server for identifying target genes of transcription factors using

ChIP-seq or ChIP-chip data.

Yang CC(1,)(2), Andrews EH(3), Chen MH(2,)(4), Wang WY(2), Chen JJ(1,)(4,)(5),

Gerstein M(6,)(7), Liu CC(8,)(9,)(10), Cheng C(11,)(12,)(13).

Author information:

(1)Institute of Molecular Biology, National Chung Hsing University, Taichung,

402, Taiwan. (2)Institute of Genomics and Bioinformatics, National Chung Hsing

University, Taichung, 402, Taiwan. (3)Geisel School of Medicine at Dartmouth,

Institute for Quantitative Biomedical Sciences, Lebanon, NH, 03766, USA.

(4)Institute of Biomedical Sciences, National Chung Hsing University, Taichung,

402, Taiwan. (5)Agricultural Biotechnology Center, National Chung Hsing

University, Taichung, 402, Taiwan. (6)Program in Computational Biology and

Bioinformatics, Yale University, 260 Whitney Avenue, New Haven, CT, 06520, USA.

(7)Department of Molecular Biophysics and Biochemistry, Yale University, 260

Whitney Avenue, New Haven, CT, 06520, USA. (8)Institute of Genomics and

Bioinformatics, National Chung Hsing University, Taichung, 402, Taiwan.

jimliu@nchu.edu.tw. (9)Institute of Biomedical Sciences, National Chung Hsing

University, Taichung, 402, Taiwan. jimliu@nchu.edu.tw. (10)Agricultural

Biotechnology Center, National Chung Hsing University, Taichung, 402, Taiwan.

jimliu@nchu.edu.tw. (11)Department of Genetics, Geisel School of Medicine at

Dartmouth, Hanover, NH, 03755, USA. chao.cheng@dartmouth.edu. (12)Geisel School

of Medicine at Dartmouth, Institute for Quantitative Biomedical Sciences,

Lebanon, NH, 03766, USA. chao.cheng@dartmouth.edu. (13)Norris Cotton Cancer

Center, Geisel School of Medicine at Dartmouth, Lebanon, NH, 03766, USA.

chao.cheng@dartmouth.edu.

BACKGROUND: Chromatin immunoprecipitation followed by massively parallel DNA

sequencing (ChIP-seq) or microarray hybridization (ChIP-chip) has been widely

used to determine the genomic occupation of transcription factors (TFs). We have

previously developed a probabilistic method, called TIP (Target Identification

from Profiles), to identify TF target genes using ChIP-seq/ChIP-chip data. To

achieve high specificity, TIP applies a conservative method to estimate

significance of target genes, with the trade-off being a relatively low

sensitivity of target gene identification compared to other methods.

Additionally, TIP's output does not render binding-peak locations or intensity,

information highly useful for visualization and general experimental biological

use, while the variability of ChIP-seq/ChIP-chip file formats has made input into

TIP more difficult than desired.

DESCRIPTION: To improve upon these facets, here we present are fined TIP with key

extensions. First, it implements a Gaussian mixture model for p-value estimation,

increasing target gene identification sensitivity and more accurately capturing

the shape of TF binding profile distributions. Second, it enables the

incorporation of TF binding-peak data by identifying their locations in

significant target gene promoter regions and quantifies their strengths. Finally,

for full ease of implementation we have incorporated it into a web server (

http://syslab3.nchu.edu.tw/iTAR/ ) that enables flexibility of input file format,

can be used across multiple species and genome assembly versions, and is freely

available for public use. The web server additionally performs GO enrichment

analysis for the identified target genes to reveal the potential function of the

corresponding TF.

CONCLUSIONS: The iTAR web server provides a user-friendly interface and supports

target gene identification in seven species, ranging from yeast to human. To

facilitate investigating the quality of ChIP-seq/ChIP-chip data, the web server

generates the chart of the characteristic binding profiles and the density plot

of normalized regulatory scores. The iTAR web server is a useful tool in

identifying TF target genes from ChIP-seq/ChIP-chip data and discovering

biological insights.

DOI: 10.1186/s12864-016-2963-0

PMCID: PMC4983039

PMID: 27519564

135. BMC Genomics. 2016 Aug 11;17(1):622. doi: 10.1186/s12864-016-2964-z.

COMAN: a web server for comprehensive metatranscriptomics analysis.

Ni Y(1), Li J(1), Panagiotou G(2).

Author information:

(1)Systems Biology & Bioinformatics Group, School of Biological Sciences, The

University of Hong Kong, Pokfulam Road, Hong Kong, Hong Kong. (2)Systems Biology

& Bioinformatics Group, School of Biological Sciences, The University of Hong

Kong, Pokfulam Road, Hong Kong, Hong Kong. gipa@hku.hk.

BACKGROUND: Microbiota-oriented studies based on metagenomic or

metatranscriptomic sequencing have revolutionised our understanding on microbial

ecology and the roles of both clinical and environmental microbes. The analysis

of massive metatranscriptomic data requires extensive computational resources, a

collection of bioinformatics tools and expertise in programming.

RESULTS: We developed COMAN (Comprehensive Metatranscriptomics Analysis), a

web-based tool dedicated to automatically and comprehensively analysing

metatranscriptomic data. COMAN pipeline includes quality control of raw reads,

removal of reads derived from non-coding RNA, followed by functional annotation,

comparative statistical analysis, pathway enrichment analysis, co-expression

network analysis and high-quality visualisation. The essential data generated by

COMAN are also provided in tabular format for additional analysis and integration

with other software. The web server has an easy-to-use interface and detailed

instructions, and is freely available at http://sbb.hku.hk/COMAN/ CONCLUSIONS:

COMAN is an integrated web server dedicated to comprehensive functional analysis

of metatranscriptomic data, translating massive amount of reads to data tables

and high-standard figures. It is expected to facilitate the researchers with less

expertise in bioinformatics in answering microbiota-related biological questions

and to increase the accessibility and interpretation of microbiota RNA-Seq data.

DOI: 10.1186/s12864-016-2964-z

PMCID: PMC4982211

PMID: 27515514

136. Sci Rep. 2016 Aug 11;6:31080. doi: 10.1038/srep31080.

RAMPred: identifying the N(1)-methyladenosine sites in eukaryotic transcriptomes.

Chen W(1), Feng P(2), Tang H(3), Ding H(4), Lin H(4).

Author information:

(1)Department of Physics, School of Sciences, and Center for Genomics and

Computational Biology, North China University of Science and Technology,

Tangshan, Tangshan 063000, China. (2)School of Public Health, North China

University of Science and Technology, Tangshan, 063000, China. (3)Department of

Pathophysiology, Southwest Medical University, Luzhou 646000, China. (4)Key

Laboratory for Neuro-Information of Ministry of Education, Center of

Bioinformatics and Center for Information in Biomedicine, School of Life Science

and Technology, University of Electronic Science and Technology of China, Chengdu

610054, China.

N(1)-methyladenosine (m(1)A) is a prominent RNA modification involved in many

biological processes. Accurate identification of m(1)A site is invaluable for

better understanding the biological functions of m(1)A. However, limitations in

experimental methods preclude the progress towards the identification of m(1)A

site. As an excellent complement of experimental methods, a support vector

machine based-method called RAMPred is proposed to identify m(1)A sites in H.

sapiens, M. musculus and S. cerevisiae genomes for the first time. In this

method, RNA sequences are encoded by using nucleotide chemical property and

nucleotide compositions. RAMPred achieves promising performances in jackknife

tests, cross cell line tests and cross species tests, indicating that RAMPred

holds very high potential to become a useful tool for identifying m(1)A sites.

For the convenience of experimental scientists, a web-server based on the

proposed model was constructed and could be freely accessible at

http://lin.uestc.edu.cn/server/RAMPred.

DOI: 10.1038/srep31080

PMCID: PMC4980636

PMID: 27511610

137. Oncotarget. 2016 Aug 9;7(32):51270-51283. doi: 10.18632/oncotarget.9987.

iPhos-PseEn: identifying phosphorylation sites in proteins by fusing different

pseudo components into an ensemble classifier.

Qiu WR(1,)(2), Xiao X(1,)(3), Xu ZC(1), Chou KC(3,)(4,)(5).

Author information:

(1)Computer Department, Jingdezhen Ceramic Institute, Jingdezhen, China.

(2)Department of Computer Science and Bond Life Science Center, University of

Missouri, Columbia, MO, USA. (3)Gordon Life Science Institute, Boston, MA, USA.

(4)Center of Excellence in Genomic Medicine Research (CEGMR), King Abdulaziz

University, Jeddah, Saudi Arabia. (5)Center of Bioinformatics, School of Life

Science and Technology, University of Electronic Science and Technology of China,

Chengdu, Sichuan, China.

Protein phosphorylation is a posttranslational modification (PTM or PTLM), where

a phosphoryl group is added to the residue(s) of a protein molecule. The most

commonly phosphorylated amino acids occur at serine (S), threonine (T), and

tyrosine (Y). Protein phosphorylation plays a significant role in a wide range of

cellular processes; meanwhile its dysregulation is also involved with many

diseases. Therefore, from the angles of both basic research and drug development,

we are facing a challenging problem: for an uncharacterized protein sequence

containing many residues of S, T, or Y, which ones can be phosphorylated, and

which ones cannot? To address this problem, we have developed a predictor called

iPhos-PseEn by fusing four different pseudo component approaches (amino acids'

disorder scores, nearest neighbor scores, occurrence frequencies, and position

weights) into an ensemble classifier via a voting system. Rigorous

cross-validations indicated that the proposed predictor remarkably outperformed

its existing counterparts. For the convenience of most experimental scientists, a

user-friendly web-server for iPhos-PseEn has been established at

http://www.jci-bioinfo.cn/iPhos-PseEn, by which users can easily obtain their

desired results without the need to go through the complicated mathematical

equations involved.

DOI: 10.18632/oncotarget.9987

PMCID: PMC5239474

PMID: 27323404

Conflict of interest statement: The authors declare no conflicts of interest.

138. Bioinformatics. 2016 Aug 1;32(15):2256-63. doi: 10.1093/bioinformatics/btw169.

Epub 2016 Apr 1.

GenomeRunner web server: regulatory similarity and differences define the

functional impact of SNP sets.

Dozmorov MG(1), Cara LR(1), Giles CB(2), Wren JD(3).

Author information:

(1)Department of Biostatistics, Virginia Commonwealth University, Richmond, VA,

USA. (2)Department of Arthritis and Clinical Immunology, Oklahoma Medical

Research Foundation, Oklahoma City, OK, USA. (3)Department of Arthritis and

Clinical Immunology, Oklahoma Medical Research Foundation, Oklahoma City, OK, USA

Department of Biochemistry and Molecular Biology, University of Oklahoma Health

Sciences Center, Oklahoma City, OK, USA.

MOTIVATION: The growing amount of regulatory data from the ENCODE, Roadmap

Epigenomics and other consortia provides a wealth of opportunities to investigate

the functional impact of single nucleotide polymorphisms (SNPs). Yet, given the

large number of regulatory datasets, researchers are posed with a challenge of

how to efficiently utilize them to interpret the functional impact of SNP sets.

RESULTS: We developed the GenomeRunner web server to automate systematic

statistical analysis of SNP sets within a regulatory context. Besides defining

the functional impact of SNP sets, GenomeRunner implements novel regulatory

similarity/differential analyses, and cell type-specific regulatory enrichment

analysis. Validated against literature- and disease ontology-based approaches,

analysis of 39 disease/trait-associated SNP sets demonstrated that the functional

impact of SNP sets corresponds to known disease relationships. We identified a

group of autoimmune diseases with SNPs distinctly enriched in the enhancers of T

helper cell subpopulations, and demonstrated relevant cell type-specificity of

the functional impact of other SNP sets. In summary, we show how systematic

analysis of genomic data within a regulatory context can help interpreting the

functional impact of SNP sets.

AVAILABILITY AND IMPLEMENTATION: GenomeRunner web server is freely available at

http://www.integrativegenomics.org/

CONTACT: mikhail.dozmorov@gmail.com

SUPPLEMENTARY INFORMATION: Supplementary data are available at Bioinformatics

online.

© The Author 2016. Published by Oxford University Press. All rights reserved. For

Permissions, please e-mail: journals.permissions@oup.com.

DOI: 10.1093/bioinformatics/btw169

PMCID: PMC4965636 [Available on 2017-08-01]

PMID: 27153607

139. Bioinformatics. 2016 Aug 1;32(15):2386-8. doi: 10.1093/bioinformatics/btw141.

Epub 2016 Mar 12.

FRODOCK 2.0: fast protein-protein docking server.

Ramírez-Aportela E(1), López-Blanco JR(2), Chacón P(2).

Author information:

(1)Department of Biological Chemical Physics, Rocasolano Physical Chemistry

Institute C.S.I.C, Madrid 28006, Spain Centro de Investigaciones Biológicas,

CSIC, Madrid E-28040, Spain. (2)Department of Biological Chemical Physics,

Rocasolano Physical Chemistry Institute C.S.I.C, Madrid 28006, Spain.

The prediction of protein-protein complexes from the structures of unbound

components is a challenging and powerful strategy to decipher the mechanism of

many essential biological processes. We present a user-friendly protein-protein

docking server based on an improved version of FRODOCK that includes a

complementary knowledge-based potential. The web interface provides a very

effective tool to explore and select protein-protein models and interactively

screen them against experimental distance constraints. The competitive success

rates and efficiency achieved allow the retrieval of reliable potential

protein-protein binding conformations that can be further refined with more

computationally demanding strategies.AVAILABILITY AND IMPLEMENTATION: The server

is free and open to all users with no login requirement at

http://frodock.chaconlab.org

CONTACT: pablo@chaconlab.org

SUPPLEMENTARY INFORMATION: Supplementary data are available at Bioinformatics

online.

© The Author 2016. Published by Oxford University Press. All rights reserved. For

Permissions, please e-mail: journals.permissions@oup.com.

DOI: 10.1093/bioinformatics/btw141

PMID: 27153583

140. Bioinformatics. 2016 Aug 1;32(15):2289-96. doi: 10.1093/bioinformatics/btw133.

Epub 2016 Mar 11.

PinaColada: peptide-inhibitor ant colony ad-hoc design algorithm.

Zaidman D(1), Wolfson HJ(1).

Author information:

(1)Blavatnik School of Computer Science, Tel Aviv University, Tel Aviv 69978,

Israel.

MOTIVATION: Design of protein-protein interaction (PPI) inhibitors is a major

challenge in Structural Bioinformatics. Peptides, especially short ones (5-15

amino acid long), are natural candidates for inhibition of protein-protein

complexes due to several attractive features such as high structural

compatibility with the protein binding site (mimicking the surface of one of the

proteins), small size and the ability to form strong hotspot binding connections

with the protein surface. Efficient rational peptide design is still a major

challenge in computer aided drug design, due to the huge space of possible

sequences, which is exponential in the length of the peptide, and the high

flexibility of peptide conformations.

RESULTS: In this article we present PinaColada, a novel computational method for

the design of peptide inhibitors for protein-protein interactions. We employ a

version of the ant colony optimization heuristic, which is used to explore the

exponential space ([Formula: see text]) of length n peptide sequences, in

combination with our fast robotics motivated PepCrawler algorithm, which explores

the conformational space for each candidate sequence. PinaColada is being run in

parallel, on a DELL PowerEdge 2.8 GHZ computer with 20 cores and 256 GB memory,

and takes up to 24 h to design a peptide of 5-15 amino acids length.

AVAILABILITY AND IMPLEMENTATION: An online server available at:

http://bioinfo3d.cs.tau.ac.il/PinaColada/.

CONTACT: danielza@post.tau.ac.il; wolfson@tau.ac.il.

© The Author 2016. Published by Oxford University Press. All rights reserved. For

Permissions, please e-mail: journals.permissions@oup.com.

DOI: 10.1093/bioinformatics/btw133

PMID: 27153578

141. Curr Protoc Immunol. 2016 Aug 1;114:18.19.1-18.19.24. doi: 10.1002/cpim.12.

TepiTool: A Pipeline for Computational Prediction of T Cell Epitope Candidates.

Paul S(1), Sidney J(1), Sette A(1), Peters B(1).

Author information:

(1)La Jolla Institute for Allergy and Immunology, Division of Vaccine Discovery,

La Jolla, California.

Computational prediction of T cell epitope candidates is currently being used in

several applications including vaccine discovery studies, development of

diagnostics, and removal of unwanted immune responses against protein

therapeutics. There have been continuous improvements in the performance of MHC

binding prediction tools, but their general adoption by immunologists has been

slow due to the lack of user-friendly interfaces and guidelines. Current tools

only provide minimal advice on what alleles to include, what lengths to consider,

how to deal with homologous peptides, and what cutoffs should be considered

relevant. This protocol provides step-by-step instructions with necessary

recommendations for prediction of the best T cell epitope candidates with the

newly developed online tool called TepiTool. TepiTool, which is part of the

Immune Epitope Database (IEDB), provides some of the top MHC binding prediction

algorithms for number of species including humans, chimpanzees, bovines,

gorillas, macaques, mice, and pigs. The TepiTool is freely accessible at

http://tools.iedb.org/tepitool/. © 2016 by John Wiley & Sons, Inc.

Copyright © 2016 John Wiley & Sons, Inc.

DOI: 10.1002/cpim.12

PMCID: PMC4981331 [Available on 2017-08-01]

PMID: 27479659

142. Hum Mutat. 2016 Aug;37(8):820-6. doi: 10.1002/humu.23007. Epub 2016 May 24.

Enrichment of SNPs in Functional Categories Reveals Genes Affecting Complex

Traits.

Zhao H(1), Fan D(2), Nyholt DR(1), Yang Y(3).

Author information:

(1)Institute of Health and Biomedical Innovation, Queensland University of

Technology, Queensland, Australia. (2)Department of Neurology, Peking University

Third Hospital, Beijing, China. (3)Institute for Glycomics, Griffith University,

Queensland, Australia.

Genome-wide association studies (GWAS) have indicated potential to identify

heritability of common complex phenotypes, but traditional approaches have

limited ability to detect hiding signals because single SNP has weak effect size

accounting for only a small fraction of overall phenotypic variations. To improve

the power of GWAS, methods have been developed to identify truly associated genes

by jointly testing effects of all SNPs. However, equally considering all SNPs

within a gene might dilute strong signals of SNPs in real functional categories.

Here, we observed a consistent pattern on enrichment of significant SNPs in eight

functional categories across six phenotypes, with the highest enrichment in

coding and both UTR regions while the lowest enrichment in the intron. Based on

the pattern of SNP enrichment in functional categories, we developed a new

approach for detecting gene associations on traits (DGAT) by selecting the most

significant functional category and then using SNPs within it to assess gene

associations. The method was found to be robust in type I error rate on simulated

data, and to have mostly higher power in detecting associated genes for three

different diseases than other methods. Further analysis indicated ability of the

DGAT to detect novel genes. The DGAT is available by

http://sparks-lab.org/server/DGAT.

© 2016 WILEY PERIODICALS, INC.

DOI: 10.1002/humu.23007

PMID: 27113629

143. Neurol Clin Pract. 2016 Aug;6(4):304-314.

Knowledge translation of an online tool to determine candidacy for epilepsy

surgery evaluation.

Sauro KM(1), Holroyd-Leduc J(1), Wiebe S(1), Quan H(1), Cooke L(1), Cross JH(1),

Mathern GW(1), Armson H(1), Stromer J(1), Jetté N(1).

Author information:

(1)Department of Clinical Neurosciences & Hotchkiss Brain Institute (KMS, SW, LC,

NJ), Department of Community Health Sciences & O'Brien Institute for Public

Health (KMS, JH-L, SW, HQ, NJ), Department of Medicine (JH-L), Department of

Family Medicine (HA), and Ward of the 21st Century (JS), Cumming School of

Medicine, University of Calgary, Alberta, Canada; UCL Institute of Child Health &

Great Ormond Street Hospital for Children (JHC), London, UK; and Department of

Neurosurgery, Ronald Reagan UCLA Medical Center, University of California (GWM),

Los Angeles.

BACKGROUND: Guidelines recommend that surgery be considered in patients with

drug-resistant epilepsy, yet delays to epilepsy surgery still exist. A Web-based,

evidence-informed clinical decision tool (www.toolsforepilepsy.com) was developed

to help physicians determine which patients are appropriate for an epilepsy

surgery evaluation. We evaluated the usability and feasibility of the tool with

the intended end users in order to improve implementation into practice.

METHODS: Usability testing was conducted with relevant end users. After the tool

was modified based on usability results, another group of end users trialed the

tool in their clinical practice. This latter group of end users then participated

in focus groups and semi-structured interviews to address barriers and

facilitators to tool implementation. Finally, a stakeholder meeting was held with

domain experts and end users to discuss further changes to the tool and

implementation strategies.

RESULTS: Six overall themes were identified through usability testing, and an

additional 11 themes were identified through the focus groups and interviews. The

tool was modified based on these findings, which were then presented at the

stakeholder meeting of experts and end users for further refinement. The findings

were also used to guide discussions of potential implementation strategies at the

meeting.

CONCLUSION: This study provides guidance on how to improve the usability of

clinical decision tools by engaging end users, experts, and other key

stakeholders. The modifications to the tool should facilitate its implementation

in clinical practice and ultimately enhance the quality of care persons with

epilepsy receive.

DOI: 10.1212/CPJ.0000000000000250

PMCID: PMC4987121 [Available on 2017-08-01]

PMID: 27574569

144. Protein Eng Des Sel. 2016 Aug;29(8):281-4. doi: 10.1093/protein/gzw021. Epub 2016

Jun 9.

ProSAT+: visualizing sequence annotations on 3D structure.

Stank A(1), Richter S(2), Wade RC(3).

Author information:

(1)Heidelberg Institute for Theoretical Studies (HITS), Schloss-Wolfsbrunnenweg

35, Heidelberg 69118, Germany Heidelberg Graduate School of Mathematical and

Computational Methods for the Sciences, Im Neuenheimer Feld 205, Heidelberg

69120, Germany. (2)Heidelberg Institute for Theoretical Studies (HITS),

Schloss-Wolfsbrunnenweg 35, Heidelberg 69118, Germany. (3)Heidelberg Institute

for Theoretical Studies (HITS), Schloss-Wolfsbrunnenweg 35, Heidelberg 69118,

Germany Center for Molecular Biology at Heidelberg University (ZMBH), DKFZ-ZMBH

Alliance and Interdisciplinary Center for Scientific Computing (IWR), Im

Neuenheimer Feld 282, Heidelberg 69120, Germany rebecca.wade@h-its.org.

PRO: tein S: tructure A: nnotation T: ool-plus (ProSAT(+)) is a new web server

for mapping protein sequence annotations onto a protein structure and visualizing

them simultaneously with the structure. ProSAT(+) incorporates many of the

features of the preceding ProSAT and ProSAT2 tools but also provides new options

for the visualization and sharing of protein annotations. Data are extracted from

the UniProt KnowledgeBase, the RCSB PDB and the PDBe SIFTS resource, and

visualization is performed using JSmol. User-defined sequence annotations can be

added directly to the URL, thus enabling visualization and easy data sharing.

ProSAT(+) is available at http://prosat.h-its.org.

© The Author 2016. Published by Oxford University Press. All rights reserved. For

Permissions, please e-mail: journals.permissions@oup.com.

DOI: 10.1093/protein/gzw021

PMID: 27284084

145. PLoS Comput Biol. 2016 Jul 29;12(7):e1004976. doi: 10.1371/journal.pcbi.1004976.

eCollection 2016.

PhyloBot: A Web Portal for Automated Phylogenetics, Ancestral Sequence

Reconstruction, and Exploration of Mutational Trajectories.

Hanson-Smith V(1), Johnson A(1).

Author information:

(1)Department of Microbiology and Immunology, University of California, San

Francisco, San Francisco, California, United States of America.

The method of phylogenetic ancestral sequence reconstruction is a powerful

approach for studying evolutionary relationships among protein sequence,

structure, and function. In particular, this approach allows investigators to (1)

reconstruct and "resurrect" (that is, synthesize in vivo or in vitro) extinct

proteins to study how they differ from modern proteins, (2) identify key amino

acid changes that, over evolutionary timescales, have altered the function of the

protein, and (3) order historical events in the evolution of protein function.

Widespread use of this approach has been slow among molecular biologists, in part

because the methods require significant computational expertise. Here we present

PhyloBot, a web-based software tool that makes ancestral sequence reconstruction

easy. Designed for non-experts, it integrates all the necessary software into a

single user interface. Additionally, PhyloBot provides interactive tools to

explore evolutionary trajectories between ancestors, enabling the rapid

generation of hypotheses that can be tested using genetic or biochemical

approaches. Early versions of this software were used in previous studies to

discover genetic mechanisms underlying the functions of diverse protein families,

including V-ATPase ion pumps, DNA-binding transcription regulators, and

serine/threonine protein kinases. PhyloBot runs in a web browser, and is

available at the following URL: http://www.phylobot.com. The software is

implemented in Python using the Django web framework, and runs on elastic cloud

computing resources from Amazon Web Services. Users can create and submit jobs on

our free server (at the URL listed above), or use our open-source code to launch

their own PhyloBot server.

DOI: 10.1371/journal.pcbi.1004976

PMCID: PMC4966924

PMID: 27472806

146. Oncotarget. 2016 Jul 28. doi: 10.18632/oncotarget.10886. [Epub ahead of print]

DNA-damage related genes and clinical outcome in hormone receptor positive breast

cancer.

Nieto-Jiménez C(1), Alcaraz-Sanabria A(1), Páez R(1), Pérez-Peña J(1),

Corrales-Sánchez V(1), Pandiella A(2), Ocaña A(1).

Author information:

(1)Translational Research Unit, Albacete University Hospital, Albacete, Spain.

(2)Cancer Research Center, CSIC-University of Salamanca, Salamanca, Spain.

BACKGROUND: Control of DNA damage is frequently deregulated in solid tumors.

Upregulation of genes within this process can be indicative of a more aggressive

phenotype and linked with worse outcome. In the present article we identify DNA

damage related genes associated with worse outcome in breast cancer.

RESULTS: 2286 genes were differentially expressed between normal breast tissue

and basal-like tumors, and 62 included in the DNA metabolic process function.

Expression of RAD51, GINS1, TRIP13 and MCM2 were associated with detrimental

relapse free survival (RFS) and overall survival (OS) in luminal tumors. The

combined analyses of TRIP13+RAD51+MCM2 showed the worse association for RFS (HR

2.25 (1.51-3.35) log rank p= 4.1e-05) and TRIP13+RAD51 for OS (HR 5.13

(0.6-44.17) log rank p=0.098) in ER+/HER2- tumors. TRIP13 is amplified in 3.1% of

breast cancers.

METHODS: Transcriptomic analyses using public datasets evaluating expression

values between normal breast tissue and TNBC identified upregulated genes. Genes

included in the DNA metabolic process were selected and confirmed using data

contained at oncomine (www.oncomine.org). Evaluation of the selected genes with

RFS and OS was performed using the KM Plotter Online Tool

(http://www.kmplot.com). Evaluation of molecular alterations was performed using

cBioportal (www.cbioportal.org).

CONCLUSIONS: Expression of DNA metabolic related genes RAD51, GINS1, TRIP13 and

MCM2 are associated with poor outcome. Combinations of some of these genes are

linked to poor RFS or OS in luminal A, B and ER+HER2- tumors. Evaluation of its

predictive capacity in prospective studies is required.

DOI: 10.18632/oncotarget.10886

PMID: 27486818

147. Bioinformatics. 2016 Jul 15;32(14):2224-6. doi: 10.1093/bioinformatics/btw147.

Epub 2016 Mar 18.

Ferret: a user-friendly Java tool to extract data from the 1000 Genomes Project.

Limou S(1), Taverner AM(2), Winkler CA(1).

Author information:

(1)Molecular Genetic Epidemiology Section, Basic Research Laboratory, Basic

Science Program, NCI, Leidos Biomedical Research, Inc., Frederick National

Laboratory, Frederick, MD 21702, USA. (2)Molecular Genetic Epidemiology Section,

Basic Research Laboratory, Basic Science Program, NCI, Leidos Biomedical

Research, Inc., Frederick National Laboratory, Frederick, MD 21702, USA

Quantitative and Computational Biology program, Princeton University, Princeton,

NJ 08544, USA.

The 1000 Genomes (1KG) Project provides a near-comprehensive resource on human

genetic variation in worldwide reference populations. 1KG variants can be

accessed through a browser and through the raw and annotated data that are

regularly released on an ftp server. We developed Ferret, a user-friendly Java

tool, to easily extract genetic variation information from these large and

complex data files. From a locus, gene(s) or SNP(s) of interest, Ferret retrieves

genotype data for 1KG SNPs and indels, and computes allelic frequencies for 1KG

populations and optionally, for the Exome Sequencing Project populations. By

converting the 1KG data into files that can be imported into popular pre-existing

tools (e.g. PLINK and HaploView), Ferret offers a straightforward way, even for

non-bioinformatics specialists, to manipulate, explore and merge 1KG data with

the user's dataset, as well as visualize linkage disequilibrium pattern, infer

haplotypes and design tagSNPs.AVAILABILITY AND IMPLEMENTATION: Ferret tool and

source code are publicly available at http://limousophie35.github.io/Ferret/

CONTACT: ferret@nih.gov

SUPPLEMENTARY INFORMATION: Supplementary data are available at Bioinformatics

online.

Published by Oxford University Press 2016. This work is written by US Government

employees and is in the public domain in the US.

DOI: 10.1093/bioinformatics/btw147

PMCID: PMC4937191 [Available on 2017-07-15]

PMID: 27153588

148. Oncotarget. 2016 Jul 12;7(28):44310-44321. doi: 10.18632/oncotarget.10027.

iHyd-PseCp: Identify hydroxyproline and hydroxylysine in proteins by

incorporating sequence-coupled effects into general PseAAC.

Qiu WR(1,)(2), Sun BQ(1), Xiao X(1,)(3), Xu ZC(1), Chou KC(3,)(4,)(5).

Author information:

(1)Computer Department, Jingdezhen Ceramic Institute, Jingdezhen, China.

(2)Department of Computer Science and Bond Life Science Center, University of

Missouri, Columbia, MO, USA. (3)Gordon Life Science Institute, Boston, MA, USA.

(4)Center of Excellence in Genomic Medicine Research (CEGMR), King Abdulaziz

University, Jeddah, Saudi Arabia. (5)Center of Bioinformatics, School of Life

Science and Technology, University of Electronic Science and Technology of China,

Chengdu, Sichuan, China.

Protein hydroxylation is a posttranslational modification (PTM), in which a CH

group in Pro (P) or Lys (K) residue has been converted into a COH group, or a

hydroxyl group (-OH) is converted into an organic compound. Closely associated

with cellular signaling activities, this type of PTM is also involved in some

major diseases, such as stomach cancer and lung cancer. Therefore, from the

angles of both basic research and drug development, we are facing a challenging

problem: for an uncharacterized protein sequence containing many residues of P or

K, which ones can be hydroxylated, and which ones cannot? With the explosive

growth of protein sequences in the post-genomic age, the problem has become even

more urgent. To address such a problem, we have developed a predictor called

iHyd-PseCp by incorporating the sequence-coupled information into the general

pseudo amino acid composition (PseAAC) and introducing the "Random Forest"

algorithm to operate the calculation. Rigorous jackknife tests indicated that the

new predictor remarkably outperformed the existing state-of-the-art prediction

method for the same purpose. For the convenience of most experimental scientists,

a user-friendly web-server for iHyd-PseCp has been established at

http://www.jci-bioinfo.cn/iHyd-PseCp, by which users can easily obtain their

desired results without the need to go through the complicated mathematical

equations involved.

DOI: 10.18632/oncotarget.10027

PMCID: PMC5190098

PMID: 27322424

Conflict of interest statement: The authors declare no conflicts of interest.

149. J Cheminform. 2016 Jul 11;8:38. doi: 10.1186/s13321-016-0149-z. eCollection 2016.

bSiteFinder, an improved protein-binding sites prediction server based on

structural alignment: more accurate and less time-consuming.

Gao J(1), Zhang Q(2), Liu M(3), Zhu L(4), Wu D(2), Cao Z(2), Zhu R(2).

Author information:

(1)Department of Bioinformatics, Tongji University, Shanghai, 200092 People's

Republic of China ; School of Information Engineering, Shanghai Maritime

University, Shanghai, 201306 People's Republic of China. (2)Department of

Bioinformatics, Tongji University, Shanghai, 200092 People's Republic of China.

(3)School of Information Engineering, Shanghai Maritime University, Shanghai,

201306 People's Republic of China. (4)Digestive Diseases and Nutrition Center,

Department of Pediatrics, The State University of New York at Buffalo, Buffalo,

NY 14260 USA ; Genomics, Environment, and Microbiome Community of Excellence, The

State University of New York at Buffalo, Buffalo, NY 14203 USA ; Institute of

Digestive Diseases, Longhua Hospital, Shanghai University of Traditional Chinese

Medicine, Shanghai, 200032 People's Republic of China.

MOTIVATION: Protein-binding sites prediction lays a foundation for functional

annotation of protein and structure-based drug design. As the number of available

protein structures increases, structural alignment based algorithm becomes the

dominant approach for protein-binding sites prediction. However, the present

algorithms underutilize the ever increasing numbers of three-dimensional

protein-ligand complex structures (bound protein), and it could be improved on

the process of alignment, selection of templates and clustering of template.

Herein, we built so far the largest database of bound templates with stringent

quality control. And on this basis, bSiteFinder as a protein-binding sites

prediction server was developed.

RESULTS: By introducing Homology Indexing, Chain Length Indexing, Stability of

Complex and Optimized Multiple-Templates Clustering into our algorithm, the

efficiency of our server has been significantly improved. Further, the accuracy

was approximately 2-10 % higher than that of other algorithms for the test with

either bound dataset or unbound dataset. For 210 bound dataset, bSiteFinder

achieved high accuracies up to 94.8 % (MCC 0.95). For another 48 bound/unbound

dataset, bSiteFinder achieved high accuracies up to 93.8 % for bound proteins

(MCC 0.95) and 85.4 % for unbound proteins (MCC 0.72). Our bSiteFinder server is

freely available at http://binfo.shmtu.edu.cn/bsitefinder/, and the source code

is provided at the methods page.

CONCLUSION: An online bSiteFinder server is freely available at

http://binfo.shmtu.edu.cn/bsitefinder/. Our work lays a foundation for functional

annotation of protein and structure-based drug design. With ever increasing

numbers of three-dimensional protein-ligand complex structures, our server should

be more accurate and less time-consuming.Graphical Abstract bSiteFinder

(http://binfo.shmtu.edu.cn/bsitefinder/) as a protein-binding sites prediction

server was developed based on the largest database of bound templates so far with

stringent quality control. By introducing Homology Indexing, Chain Length

Indexing, Stability of Complex and Optimized Multiple-Templates Clustering into

our algorithm, the efficiency of our server have been significantly improved.

What's more, the accuracy was approximately 2-10 % higher than that of other

algorithms for the test with either bound dataset or unbound dataset.

DOI: 10.1186/s13321-016-0149-z

PMCID: PMC4939519

PMID: 27403208

150. Nucleic Acids Res. 2016 Jul 8;44(W1):W181-4. doi: 10.1093/nar/gkw459. Epub 2016

May 29.

miRNAFold: a web server for fast miRNA precursor prediction in genomes.

Tav C(1), Tempel S(1), Poligny L(1), Tahi F(2).

Author information:

(1)IBISC-IBGBI, Université Evry, Genopole, 23 Boulevard de France, 91037 Evry

CEDEX, France. (2)IBISC-IBGBI, Université Evry, Genopole, 23 Boulevard de France,

91037 Evry CEDEX, France Institute of Plant Sciences Paris Saclay (IPS2), CNRS,

INRA, Université Paris-Sud, Université Evry, Université Paris-Saclay, Batiment

630, 91405 Orsay, France fariza.tahi@ibisc.univ-evry.fr.

Computational methods are required for prediction of non-coding RNAs (ncRNAs),

which are involved in many biological processes, especially at

post-transcriptional level. Among these ncRNAs, miRNAs have been largely studied

and biologists need efficient and fast tools for their identification. In

particular, ab initio methods are usually required when predicting novel miRNAs.

Here we present a web server dedicated for miRNA precursors identification at a

large scale in genomes. It is based on an algorithm called miRNAFold that allows

predicting miRNA hairpin structures quickly with high sensitivity. miRNAFold is

implemented as a web server with an intuitive and user-friendly interface, as

well as a standalone version. The web server is freely available at:

http://EvryRNA.ibisc.univ-evry.fr/miRNAFold.

© The Author(s) 2016. Published by Oxford University Press on behalf of Nucleic

Acids Research.

DOI: 10.1093/nar/gkw459

PMCID: PMC4987958

PMID: 27242364

151. Nucleic Acids Res. 2016 Jul 8;44(W1):W469-73. doi: 10.1093/nar/gkw458. Epub 2016

May 23.

mCSM-AB: a web server for predicting antibody-antigen affinity changes upon

mutation with graph-based signatures.

Pires DE(1), Ascher DB(2).

Author information:

(1)Centro de Pesquisas René Rachou, Fundação Oswaldo Cruz, Belo Horizonte

30190-002, Brazil douglas.pires@cpqrr.fiocruz.br. (2)Centro de Pesquisas René

Rachou, Fundação Oswaldo Cruz, Belo Horizonte 30190-002, Brazil Department of

Biochemistry, University of Cambridge, Cambridge CB2 1GA, UK Department of

Biochemistry, University of Melbourne, Victoria 3010, Australia

dascher@svi.edu.au.

Computational methods have traditionally struggled to predict the effect of

mutations in antibody-antigen complexes on binding affinity. This has limited

their usefulness during antibody engineering and development, and their ability

to predict biologically relevant escape mutations. Here we present mCSM-AB, a

user-friendly web server for accurately predicting antibody-antigen affinity

changes upon mutation which relies on graph-based signatures. We show that

mCSM-AB performs better than comparable methods that have been previously used

for antibody engineering. mCSM-AB web server is available at

http://structure.bioc.cam.ac.uk/mcsm_ab.

© The Author(s) 2016. Published by Oxford University Press on behalf of Nucleic

Acids Research.

DOI: 10.1093/nar/gkw458

PMCID: PMC4987957

PMID: 27216816

152. Nucleic Acids Res. 2016 Jul 8;44(W1):W128-34. doi: 10.1093/nar/gkw455. Epub 2016

May 20.

DIANA-mirExTra v2.0: Uncovering microRNAs and transcription factors with crucial

roles in NGS expression data.

Vlachos IS(1), Vergoulis T(2), Paraskevopoulou MD(3), Lykokanellos F(2),

Georgakilas G(3), Georgiou P(2), Chatzopoulos S(2), Karagkouni D(3),

Christodoulou F(4), Dalamagas T(2), Hatzigeorgiou AG(5).

Author information:

(1)DIANA-Lab, Department of Electrical & Computer Engineering, University of

Thessaly, 38221 Volos, Greece Hellenic Pasteur Institute, 127 Vasilissis Sofias

Avenue, 11521 Athens, Greece Laboratory for Experimental Surgery and Surgical

Research 'N.S. Christeas', Medical School of Athens, University of Athens, Athens

11527, Greece ivlachos@lessr.eu. (2)'Athena' Research and Innovation Center,

11524 Athens, Greece. (3)DIANA-Lab, Department of Electrical & Computer

Engineering, University of Thessaly, 38221 Volos, Greece Hellenic Pasteur

Institute, 127 Vasilissis Sofias Avenue, 11521 Athens, Greece. (4)Miroculus, San

Francisco, CA 94107, USA. (5)DIANA-Lab, Department of Electrical & Computer

Engineering, University of Thessaly, 38221 Volos, Greece Hellenic Pasteur

Institute, 127 Vasilissis Sofias Avenue, 11521 Athens, Greece arhatzig@uth.gr.

Differential expression analysis (DEA) is one of the main instruments utilized

for revealing molecular mechanisms in pathological and physiological conditions.

DIANA-mirExTra v2.0 (http://www.microrna.gr/mirextrav2) performs a combined DEA

of mRNAs and microRNAs (miRNAs) to uncover miRNAs and transcription factors (TFs)

playing important regulatory roles between two investigated states. The web

server uses as input miRNA/RNA-Seq read count data sets that can be uploaded for

analysis. Users can combine their data with 350 small-RNA-Seq and 65 RNA-Seq

in-house analyzed libraries which are provided by DIANA-mirExTra v2.0.The web

server utilizes miRNA:mRNA, TF:mRNA and TF:miRNA interactions derived from

extensive experimental data sets. More than 450 000 miRNA interactions and 2 000

000 TF binding sites from specific or high-throughput techniques have been

incorporated, while accurate miRNA TSS annotation is obtained from microTSS

experimental/in silico framework. These comprehensive data sets enable users to

perform analyses based solely on experimentally supported information and to

uncover central regulators within sequencing data: miRNAs controlling mRNAs and

TFs regulating mRNA or miRNA expression. The server also supports predicted

miRNA:gene interactions from DIANA-microT-CDS for 4 species (human, mouse,

nematode and fruit fly). DIANA-mirExTra v2.0 has an intuitive user interface and

is freely available to all users without any login requirement.

© The Author(s) 2016. Published by Oxford University Press on behalf of Nucleic

Acids Research.

DOI: 10.1093/nar/gkw455

PMCID: PMC4987956

PMID: 27207881

153. Nucleic Acids Res. 2016 Jul 8;44(W1):W568-74. doi: 10.1093/nar/gkw454. Epub 2016

May 19.

BindUP: a web server for non-homology-based prediction of DNA and RNA binding

proteins.

Paz I(1), Kligun E(1), Bengad B(1), Mandel-Gutfreund Y(2).

Author information:

(1)Department of Biology, Technion-Israel Institute of Technology, Technion City,

Haifa 32000, Israel. (2)Department of Biology, Technion-Israel Institute of

Technology, Technion City, Haifa 32000, Israel yaelmg@tx.technion.ac.il.

Gene expression is a multi-step process involving many layers of regulation. The

main regulators of the pathway are DNA and RNA binding proteins. While over the

years, a large number of DNA and RNA binding proteins have been identified and

extensively studied, it is still expected that many other proteins, some with yet

another known function, are awaiting to be discovered. Here we present a new web

server, BindUP, freely accessible through the website

http://bindup.technion.ac.il/, for predicting DNA and RNA binding proteins using

a non-homology-based approach. Our method is based on the electrostatic features

of the protein surface and other general properties of the protein. BindUP

predicts nucleic acid binding function given the proteins three-dimensional

structure or a structural model. Additionally, BindUP provides information on the

largest electrostatic surface patches, visualized on the server. The server was

tested on several datasets of DNA and RNA binding proteins, including proteins

which do not possess DNA or RNA binding domains and have no similarity to known

nucleic acid binding proteins, achieving very high accuracy. BindUP is applicable

in either single or batch modes and can be applied for testing hundreds of

proteins simultaneously in a highly efficient manner.

© The Author(s) 2016. Published by Oxford University Press on behalf of Nucleic

Acids Research.

DOI: 10.1093/nar/gkw454

PMCID: PMC4987955

PMID: 27198220

154. Nucleic Acids Res. 2016 Jul 8;44(W1):W367-74. doi: 10.1093/nar/gkw315. Epub 2016

May 19.

The RING 2.0 web server for high quality residue interaction networks.

Piovesan D(1), Minervini G(1), Tosatto SC(2).

Author information:

(1)Department of Biomedical Sciences, University of Padua, Padua 35121, Italy.

(2)Department of Biomedical Sciences, University of Padua, Padua 35121, Italy CNR

Institute of Neuroscience, Padua 35121, Italy silvio.tosatto@unipd.it.

Residue interaction networks (RINs) are an alternative way of representing

protein structures where nodes are residues and arcs physico-chemical

interactions. RINs have been extensively and successfully used for analysing

mutation effects, protein folding, domain-domain communication and catalytic

activity. Here we present RING 2.0, a new version of the RING software for the

identification of covalent and non-covalent bonds in protein structures,

including π-π stacking and π-cation interactions. RING 2.0 is extremely fast and

generates both intra and inter-chain interactions including solvent and ligand

atoms. The generated networks are very accurate and reliable thanks to a complex

empirical re-parameterization of distance thresholds performed on the entire

Protein Data Bank. By default, RING output is generated with optimal parameters

but the web server provides an exhaustive interface to customize the calculation.

The network can be visualized directly in the browser or in Cytoscape.

Alternatively, the RING-Viz script for Pymol allows visualizing the interactions

at atomic level in the structure. The web server and RING-Viz, together with an

extensive help and tutorial, are available from URL:

http://protein.bio.unipd.it/ring.

© The Author(s) 2016. Published by Oxford University Press on behalf of Nucleic

Acids Research.

DOI: 10.1093/nar/gkw315

PMCID: PMC4987896

PMID: 27198219

155. Nucleic Acids Res. 2016 Jul 8;44(W1):W147-53. doi: 10.1093/nar/gkw419. Epub 2016

May 17.

Heatmapper: web-enabled heat mapping for all.

Babicki S(1), Arndt D(1), Marcu A(1), Liang Y(1), Grant JR(1), Maciejewski A(2),

Wishart DS(3).

Author information:

(1)Department of Computing Science, University of Alberta, Edmonton, AB T6G 2E8,

Canada. (2)Department of Biological Sciences, University of Alberta, Edmonton, AB

T6G 2E9, Canada. (3)Department of Computing Science, University of Alberta,

Edmonton, AB T6G 2E8, Canada Department of Biological Sciences, University of

Alberta, Edmonton, AB T6G 2E9, Canada National Institute for Nanotechnology,

11421 Saskatchewan Drive, Edmonton, AB T6G 2M9, Canada david.wishart@ualberta.ca.

Heatmapper is a freely available web server that allows users to interactively

visualize their data in the form of heat maps through an easy-to-use graphical

interface. Unlike existing non-commercial heat map packages, which either lack

graphical interfaces or are specialized for only one or two kinds of heat maps,

Heatmapper is a versatile tool that allows users to easily create a wide variety

of heat maps for many different data types and applications. More specifically,

Heatmapper allows users to generate, cluster and visualize: (i) expression-based

heat maps from transcriptomic, proteomic and metabolomic experiments; (ii)

pairwise distance maps; (iii) correlation maps; (iv) image overlay heat maps; (v)

latitude and longitude heat maps and (vi) geopolitical (choropleth) heat maps.

Heatmapper offers a number of simple and intuitive customization options for

facile adjustments to each heat map's appearance and plotting parameters.

Heatmapper also allows users to interactively explore their numeric data values

by hovering their cursor over each heat map cell, or by using a

searchable/sortable data table view. Heat map data can be easily uploaded to

Heatmapper in text, Excel or tab delimited formatted tables and the resulting

heat map images can be easily downloaded in common formats including PNG, JPG and

PDF. Heatmapper is designed to appeal to a wide range of users, including

molecular biologists, structural biologists, microbiologists, epidemiologists,

environmental scientists, agriculture/forestry scientists, fish and wildlife

biologists, climatologists, geologists, educators and students. Heatmapper is

available at http://www.heatmapper.ca.

© The Author(s) 2016. Published by Oxford University Press on behalf of Nucleic

Acids Research.

DOI: 10.1093/nar/gkw419

PMCID: PMC4987948

PMID: 27190236

156. Nucleic Acids Res. 2016 Jul 8;44(W1):W328-32. doi: 10.1093/nar/gkw412. Epub 2016

May 16.

iPARTS2: an improved tool for pairwise alignment of RNA tertiary structures,

version 2.

Yang CH(1), Shih CT(2), Chen KT(2), Lee PH(2), Tsai PH(2), Lin JC(2), Yen CY(2),

Lin TY(3), Lu CL(4).

Author information:

(1)Institute of Bioinformatics and Systems Biology, National Chiao Tung

University, Hsinchu 30050, Taiwan Department of Biological Science and

Technology, National Chiao Tung University, Hsinchu 30050, Taiwan. (2)Department

of Computer Science, National Tsing Hua University, Hsinchu 30013, Taiwan.

(3)Department of Biological Science and Technology, National Chiao Tung

University, Hsinchu 30050, Taiwan. (4)Department of Computer Science, National

Tsing Hua University, Hsinchu 30013, Taiwan cllu@cs.nthu.edu.tw.

Since its first release in 2010, iPARTS has become a valuable tool for globally

or locally aligning two RNA 3D structures. It was implemented by a structural

alphabet (SA)-based approach, which uses an SA of 23 letters to reduce RNA 3D

structures into 1D sequences of SA letters and applies traditional sequence

alignment to these SA-encoded sequences for determining their global or local

similarity. In this version, we have re-implemented iPARTS into a new web server

iPARTS2 by constructing a totally new SA, which consists of 92 elements with each

carrying both information of base and backbone geometry for a representative

nucleotide. This SA is significantly different from the one used in iPARTS,

because the latter consists of only 23 elements with each carrying only the

backbone geometry information of a representative nucleotide. Our experimental

results have shown that iPARTS2 outperforms its previous version iPARTS and also

achieves better accuracy than other popular tools, such as SARA, SETTER and RASS,

in RNA alignment quality and function prediction. iPARTS2 takes as input two RNA

3D structures in the PDB format and outputs their global or local alignments with

graphical display. iPARTS2 is now available online at

http://genome.cs.nthu.edu.tw/iPARTS2/.

© The Author(s) 2016. Published by Oxford University Press on behalf of Nucleic

Acids Research.

DOI: 10.1093/nar/gkw412

PMCID: PMC4987943

PMID: 27185896

157. Nucleic Acids Res. 2016 Jul 8;44(W1):W308-14. doi: 10.1093/nar/gkw440. Epub 2016

May 16.

incaRNAfbinv: a web server for the fragment-based design of RNA sequences.

Drory Retwitzer M(1), Reinharz V(2), Ponty Y(3), Waldispühl J(2), Barash D(4).

Author information:

(1)Department of Computer Science, Ben-Gurion University, Beer-Sheva 84105,

Israel. (2)School of Computer Science & McGill Centre for Bioinformatics, McGill

University, Montréal, QC H3A 0E9, Canada. (3)Laboratoire d'Informatique

(LIX)-CNRS UMR 7161, École Polytechnique, 91128 Palaiseau, France AMIB

team/project, INRIA Saclay, Bâtiment Alan Turing, 91128 Palaiseau, France.

(4)Department of Computer Science, Ben-Gurion University, Beer-Sheva 84105,

Israel dbarash@cs.bgu.ac.il.

In recent years, new methods for computational RNA design have been developed and

applied to various problems in synthetic biology and nanotechnology. Lately,

there is considerable interest in incorporating essential biological information

when solving the inverse RNA folding problem. Correspondingly, RNAfbinv aims at

including biologically meaningful constraints and is the only program to-date

that performs a fragment-based design of RNA sequences. In doing so it allows the

design of sequences that do not necessarily exactly fold into the target, as long

as the overall coarse-grained tree graph shape is preserved. Augmented by the

weighted sampling algorithm of incaRNAtion, our web server called incaRNAfbinv

implements the method devised in RNAfbinv and offers an interactive environment

for the inverse folding of RNA using a fragment-based design approach. It takes

as input: a target RNA secondary structure; optional sequence and motif

constraints; optional target minimum free energy, neutrality and GC content. In

addition to the design of synthetic regulatory sequences, it can be used as a

pre-processing step for the detection of novel natural occurring RNAs. The two

complementary methodologies RNAfbinv and incaRNAtion are merged together and

fully implemented in our web server incaRNAfbinv, available at

http://www.cs.bgu.ac.il/incaRNAfbinv.

© The Author(s) 2016. Published by Oxford University Press on behalf of Nucleic

Acids Research.

DOI: 10.1093/nar/gkw440

PMID: 27185893

158. Nucleic Acids Res. 2016 Jul 8;44(W1):W252-8. doi: 10.1093/nar/gkw434. Epub 2016

May 16.

CTLPScanner: a web server for chromothripsis-like pattern detection.

Yang J(1), Liu J(1), Ouyang L(2), Chen Y(3), Liu B(4), Cai H(5).

Author information:

(1)Center of Growth, Metabolism, and Aging, Key Laboratory of Bio-Resources and

Eco-Environment, College of Life Sciences, Sichuan University, Chengdu 610064,

Sichuan, China. (2)State Key Laboratory of Biotherapy, West China Hospital,

Sichuan University, and Collaborative Innovation Center of Biotherapy, Chengdu

610041, Sichuan, China. (3)State Key Laboratory of Biotherapy, West China

Hospital, Sichuan University, and Collaborative Innovation Center of Biotherapy,

Chengdu 610041, Sichuan, China Department of Gastrointestinal Surgery, West China

Hospital, Sichuan University, Chengdu 610041, Sichuan, China. (4)State Key

Laboratory of Biotherapy, West China Hospital, Sichuan University, and

Collaborative Innovation Center of Biotherapy, Chengdu 610041, Sichuan, China

liubo2400@scu.edu.cn. (5)Center of Growth, Metabolism, and Aging, Key Laboratory

of Bio-Resources and Eco-Environment, College of Life Sciences, Sichuan

University, Chengdu 610064, Sichuan, China haoyang.cai@scu.edu.cn.

Chromothripsis is a recently observed phenomenon in cancer cells in which one or

several chromosomes shatter into pieces with subsequent inaccurate reassembly and

clonal propagation. This type of event generates a potentially vast number of

mutations within a relatively short-time period, and has been considered as a new

paradigm in cancer development. Despite recent advances, much work is still

required to better understand the molecular mechanisms of this phenomenon, and

thus an easy-to-use tool is in urgent need for automatically detecting and

annotating chromothripsis. Here we present CTLPScanner, a web server for

detection of chromothripsis-like pattern (CTLP) in genomic array data. The output

interface presents intuitive graphical representations of detected chromosome

pulverization region, as well as detailed results in table format. CTLPScanner

also provides additional information for associated genes in chromothripsis

region to help identify the potential candidates involved in tumorigenesis. To

assist in performing meta-data analysis, we integrated over 50 000 pre-processed

genomic arrays from The Cancer Genome Atlas and Gene Expression Omnibus into

CTLPScanner. The server allows users to explore the presence of chromothripsis

signatures from public data resources, without carrying out any local data

processing. CTLPScanner is freely available at

http://cgma.scu.edu.cn/CTLPScanner/.

© The Author(s) 2016. Published by Oxford University Press on behalf of Nucleic

Acids Research.

DOI: 10.1093/nar/gkw434

PMCID: PMC4987951

PMID: 27185889

159. Nucleic Acids Res. 2016 Jul 8;44(W1):W185-93. doi: 10.1093/nar/gkw414. Epub 2016

May 13.

tRF2Cancer: A web server to detect tRNA-derived small RNA fragments (tRFs) and

their expression in multiple cancers.

Zheng LL(1), Xu WL(1), Liu S(1), Sun WJ(1), Li JH(1), Wu J(1), Yang JH(2), Qu

LH(3).

Author information:

(1)Key Laboratory of Gene Engineering of the Ministry of Education, State Key

Laboratory of Biocontrol, School of Life Sciences, Sun Yat-sen University,

Guangzhou 510275, P. R. China. (2)Key Laboratory of Gene Engineering of the

Ministry of Education, State Key Laboratory of Biocontrol, School of Life

Sciences, Sun Yat-sen University, Guangzhou 510275, P. R. China

yangjh7@mail.sysu.edu.cn. (3)Key Laboratory of Gene Engineering of the Ministry

of Education, State Key Laboratory of Biocontrol, School of Life Sciences, Sun

Yat-sen University, Guangzhou 510275, P. R. China lssqlh@mail.sysu.edu.cn.

tRNA-derived small RNA fragments (tRFs) are one class of small non-coding RNAs

derived from transfer RNAs (tRNAs). tRFs play important roles in cellular

processes and are involved in multiple cancers. High-throughput small RNA (sRNA)

sequencing experiments can detect all the cellular expressed sRNAs, including

tRFs. However, distinguishing genuine tRFs from RNA fragments generated by random

degradation remains a major challenge. In this study, we developed an integrated

web-based computing system, tRF2Cancer, to accurately identify tRFs from sRNA

deep-sequencing data and evaluate their expression in multiple cancers. The

binomial test was introduced to evaluate whether reads from a small RNA-seq data

set represent tRFs or degraded fragments. A classification method was then used

to annotate the types of tRFs based on their sites of origin in pre-tRNA or

mature tRNA. We applied the pipeline to analyze 10 991 data sets from 32 types of

cancers and identified thousands of expressed tRFs. A tool called 'tRFinCancer'

was developed to facilitate the users to inspect the expression of tRFs across

different types of cancers. Another tool called 'tRFBrowser' shows both the sites

of origin and the distribution of chemical modification sites in tRFs on their

source tRNA. The tRF2Cancer web server is available at

http://rna.sysu.edu.cn/tRFfinder/.

© The Author(s) 2016. Published by Oxford University Press on behalf of Nucleic

Acids Research.

DOI: 10.1093/nar/gkw414

PMCID: PMC4987945

PMID: 27179031

160. Nucleic Acids Res. 2016 Jul 8;44(W1):W166-75. doi: 10.1093/nar/gkw427. Epub 2016

May 13.

DeAnnIso: a tool for online detection and annotation of isomiRs from small RNA

sequencing data.

Zhang Y(1), Zang Q(2), Zhang H(3), Ban R(2), Yang Y(4), Iqbal F(5), Li A(6), Shi

Q(7).

Author information:

(1)Molecular and Cell Genetics Laboratory, The CAS Key Laboratory of Innate

Immunity and Chronic Disease, Hefei National Laboratory for Physical Sciences at

Microscale and School of Life Sciences, University of Science and Technology of

China, Hefei 230027, China Hefei Institute of Physical Science, China Academy of

Science, Hefei 230027, China. (2)School of Information Science and Technology,

University of Science and Technology of China, Hefei 230027, China. (3)Molecular

and Cell Genetics Laboratory, The CAS Key Laboratory of Innate Immunity and

Chronic Disease, Hefei National Laboratory for Physical Sciences at Microscale

and School of Life Sciences, University of Science and Technology of China, Hefei

230027, China. (4)Department of statistics, University of Kentucky, Lexington, KY

40536, USA. (5)Molecular and Cell Genetics Laboratory, The CAS Key Laboratory of

Innate Immunity and Chronic Disease, Hefei National Laboratory for Physical

Sciences at Microscale and School of Life Sciences, University of Science and

Technology of China, Hefei 230027, China Institute of Pure and Applied Biology,

Bahauddin Zakariya University, Multan 60800, Pakistan. (6)School of Information

Science and Technology, University of Science and Technology of China, Hefei

230027, China Research Centers for Biomedical Engineering, University of Science

and Technology of China, Hefei 230027, China aoli@ustc.edu.cn. (7)Molecular and

Cell Genetics Laboratory, The CAS Key Laboratory of Innate Immunity and Chronic

Disease, Hefei National Laboratory for Physical Sciences at Microscale and School

of Life Sciences, University of Science and Technology of China, Hefei 230027,

China Hefei Institute of Physical Science, China Academy of Science, Hefei

230027, China qshi@ustc.edu.cn.

Small RNA (sRNA) Sequencing technology has revealed that microRNAs (miRNAs) are

capable of exhibiting frequent variations from their canonical sequences,

generating multiple variants: the isoforms of miRNAs (isomiRs). However,

integrated tool to precisely detect and systematically annotate isomiRs from sRNA

sequencing data is still in great demand. Here, we present an online tool,

DeAnnIso (Detection and Annotation of IsomiRs from sRNA sequencing data).

DeAnnIso can detect all the isomiRs in an uploaded sample, and can extract the

differentially expressing isomiRs from paired or multiple samples. Once the

isomiRs detection is accomplished, detailed annotation information, including

isomiRs expression, isomiRs classification, SNPs in miRNAs and tissue specific

isomiR expression are provided to users. Furthermore, DeAnnIso provides a

comprehensive module of target analysis and enrichment analysis for the selected

isomiRs. Taken together, DeAnnIso is convenient for users to screen for isomiRs

of their interest and useful for further functional studies. The server is

implemented in PHP + Perl + R and available to all users for free at:

http://mcg.ustc.edu.cn/bsc/deanniso/ and http://mcg2.ustc.edu.cn/bsc/deanniso/.

© The Author(s) 2016. Published by Oxford University Press on behalf of Nucleic

Acids Research.

DOI: 10.1093/nar/gkw427

PMCID: PMC4987950

PMID: 27179030

161. Nucleic Acids Res. 2016 Jul 8;44(W1):W205-11. doi: 10.1093/nar/gkw415. Epub 2016

May 12.

PASMet: a web-based platform for prediction, modelling and analyses of metabolic

systems.

Sriyudthsak K(1), Mejia RF(1), Arita M(2), Hirai MY(3).

Author information:

(1)RIKEN Center for Sustainable Resource Science, Yokohama, Kanagawa 230-0045,

Japan. (2)RIKEN Center for Sustainable Resource Science, Yokohama, Kanagawa

230-0045, Japan National Institute of Genetics, Mishima, Shizuoka 411-8540,

Japan. (3)RIKEN Center for Sustainable Resource Science, Yokohama, Kanagawa

230-0045, Japan masami.hirai@riken.jp.

PASMet (Prediction, Analysis and Simulation of Metabolic networks) is a web-based

platform for proposing and verifying mathematical models to understand the

dynamics of metabolism. The advantages of PASMet include user-friendliness and

accessibility, which enable biologists and biochemists to easily perform

mathematical modelling. PASMet offers a series of user-functions to handle the

time-series data of metabolite concentrations. The functions are organised into

four steps: (i) Prediction of a probable metabolic pathway and its regulation;

(ii) Construction of mathematical models; (iii) Simulation of metabolic

behaviours; and (iv) Analysis of metabolic system characteristics. Each function

contains various statistical and mathematical methods that can be used

independently. Users who may not have enough knowledge of computing or

programming can easily and quickly analyse their local data without software

downloads, updates or installations. Users only need to upload their files in

comma-separated values (CSV) format or enter their model equations directly into

the website. Once the time-series data or mathematical equations are uploaded,

PASMet automatically performs computation on server-side. Then, users can

interactively view their results and directly download them to their local

computers. PASMet is freely available with no login requirement at

http://pasmet.riken.jp/ from major web browsers on Windows, Mac and Linux

operating systems.

© The Author(s) 2016. Published by Oxford University Press on behalf of Nucleic

Acids Research.

DOI: 10.1093/nar/gkw415

PMCID: PMC4987946

PMID: 27174940

162. Nucleic Acids Res. 2016 Jul 8;44(W1):W54-7. doi: 10.1093/nar/gkw413. Epub 2016

May 12.

tRNAscan-SE On-line: integrating search and context for analysis of transfer RNA

genes.

Lowe TM(1), Chan PP(2).

Author information:

(1)Department of Biomolecular Engineering, University of California Santa Cruz,

CA 95064, USA lowe@soe.ucsc.edu. (2)Department of Biomolecular Engineering,

University of California Santa Cruz, CA 95064, USA.

High-throughput genome sequencing continues to grow the need for rapid, accurate

genome annotation and tRNA genes constitute the largest family of essential,

ever-present non-coding RNA genes. Newly developed tRNAscan-SE 2.0 has advanced

the state-of-the-art methodology in tRNA gene detection and functional

prediction, captured by rich new content of the companion Genomic tRNA Database.

Previously, web-server tRNA detection was isolated from knowledge of existing

tRNAs and their annotation. In this update of the tRNAscan-SE On-line resource,

we tie together improvements in tRNA classification with greatly enhanced

biological context via dynamically generated links between web server search

results, the most relevant genes in the GtRNAdb and interactive, rich genome

context provided by UCSC genome browsers. The tRNAscan-SE On-line web server can

be accessed at http://trna.ucsc.edu/tRNAscan-SE/.

© The Author(s) 2016. Published by Oxford University Press on behalf of Nucleic

Acids Research.

DOI: 10.1093/nar/gkw413

PMCID: PMC4987944

PMID: 27174935

163. Nucleic Acids Res. 2016 Jul 8;44(W1):W479-87. doi: 10.1093/nar/gkw416. Epub 2016

May 12.

HotSpot Wizard 2.0: automated design of site-specific mutations and smart

libraries in protein engineering.

Bendl J(1), Stourac J(2), Sebestova E(2), Vavra O(2), Musil M(3), Brezovsky J(4),

Damborsky J(5).

Author information:

(1)Loschmidt Laboratories, Department of Experimental Biology and Research Centre

for Toxic Compounds in the Environment RECETOX, Masaryk University, 625 00 Brno,

Czech Republic Department of Information Systems, Faculty of Information

Technology, Brno University of Technology, 612 66 Brno, Czech Republic

International Clinical Research Center, St. Anne's University Hospital Brno,

Brno, Czech Republic. (2)Loschmidt Laboratories, Department of Experimental

Biology and Research Centre for Toxic Compounds in the Environment RECETOX,

Masaryk University, 625 00 Brno, Czech Republic. (3)Loschmidt Laboratories,

Department of Experimental Biology and Research Centre for Toxic Compounds in the

Environment RECETOX, Masaryk University, 625 00 Brno, Czech Republic Department

of Information Systems, Faculty of Information Technology, Brno University of

Technology, 612 66 Brno, Czech Republic. (4)Loschmidt Laboratories, Department of

Experimental Biology and Research Centre for Toxic Compounds in the Environment

RECETOX, Masaryk University, 625 00 Brno, Czech Republic International Clinical

Research Center, St. Anne's University Hospital Brno, Brno, Czech Republic

brezovsky@mail.muni.cz. (5)Loschmidt Laboratories, Department of Experimental

Biology and Research Centre for Toxic Compounds in the Environment RECETOX,

Masaryk University, 625 00 Brno, Czech Republic International Clinical Research

Center, St. Anne's University Hospital Brno, Brno, Czech Republic

jiri@chemi.muni.cz.

HotSpot Wizard 2.0 is a web server for automated identification of hot spots and

design of smart libraries for engineering proteins' stability, catalytic

activity, substrate specificity and enantioselectivity. The server integrates

sequence, structural and evolutionary information obtained from 3 databases and

20 computational tools. Users are guided through the processes of selecting hot

spots using four different protein engineering strategies and optimizing the

resulting library's size by narrowing down a set of substitutions at individual

randomized positions. The only required input is a query protein structure. The

results of the calculations are mapped onto the protein's structure and

visualized with a JSmol applet. HotSpot Wizard lists annotated residues suitable

for mutagenesis and can automatically design appropriate codons for each

implemented strategy. Overall, HotSpot Wizard provides comprehensive annotations

of protein structures and assists protein engineers with the rational design of

site-specific mutations and focused libraries. It is freely available at

http://loschmidt.chemi.muni.cz/hotspotwizard.

© The Author(s) 2016. Published by Oxford University Press on behalf of Nucleic

Acids Research.

DOI: 10.1093/nar/gkw416

PMCID: PMC4987947

PMID: 27174934

164. Nucleic Acids Res. 2016 Jul 8;44(W1):W488-93. doi: 10.1093/nar/gkw409. Epub 2016

May 12.

MoRFchibi SYSTEM: software tools for the identification of MoRFs in protein

sequences.

Malhis N(1), Jacobson M(2), Gsponer J(3).

Author information:

(1)Michael Smith Laboratories-Centre for High-Throughput Biology, The University

of British Columbia, Vancouver, BC V6T 1Z4, Canada nmalhis@chibi.ubc.ca.

(2)Michael Smith Laboratories-Centre for High-Throughput Biology, The University

of British Columbia, Vancouver, BC V6T 1Z4, Canada. (3)Michael Smith

Laboratories-Centre for High-Throughput Biology, The University of British

Columbia, Vancouver, BC V6T 1Z4, Canada Department of Biochemistry and Molecular

Biology, University of British Columbia, Vancouver, BC V6T 1Z3, Canada

gsponer@chibi.ubc.ca.

Molecular recognition features, MoRFs, are short segments within longer

disordered protein regions that bind to globular protein domains in a process

known as disorder-to-order transition. MoRFs have been found to play a

significant role in signaling and regulatory processes in cells. High-confidence

computational identification of MoRFs remains an important challenge. In this

work, we introduce MoRFchibi SYSTEM that contains three MoRF predictors:

MoRFCHiBi, a basic predictor best suited as a component in other applications,

MoRFCHiBi_ Light, ideal for high-throughput predictions and MoRFCHiBi_ Web,

slower than the other two but best for high accuracy predictions. Results show

that MoRFchibi SYSTEM provides more than double the precision of other

predictors. MoRFchibi SYSTEM is available in three different forms: as HTML web

server, RESTful web server and downloadable software at:

http://www.chibi.ubc.ca/faculty/joerg-gsponer/gsponer-lab/software/morf_chibi/.

© The Author(s) 2016. Published by Oxford University Press on behalf of Nucleic

Acids Research.

DOI: 10.1093/nar/gkw409

PMCID: PMC4987941

PMID: 27174932

165. Nucleic Acids Res. 2016 Jul 8;44(W1):W333-8. doi: 10.1093/nar/gkw410. Epub 2016

May 12.

rMAPS: RNA map analysis and plotting server for alternative exon regulation.

Park JW(1), Jung S(2), Rouchka EC(3), Tseng YT(4), Xing Y(5).

Author information:

(1)Department of Computer Engineering and Computer Science, University of

Louisville, Louisville, KY 40292, USA KBRIN Bioinformatics Core, University of

Louisville, Louisville, KY 40202, USA Department of Microbiology, Immunology &

Molecular Genetics, University of California, Los Angeles, CA 90095, USA

juw.park@louisville.edu. (2)Department of Computer Engineering and Computer

Science, University of Louisville, Louisville, KY 40292, USA. (3)Department of

Computer Engineering and Computer Science, University of Louisville, Louisville,

KY 40292, USA KBRIN Bioinformatics Core, University of Louisville, Louisville, KY

40202, USA. (4)Department of Microbiology, Immunology & Molecular Genetics,

University of California, Los Angeles, CA 90095, USA. (5)Department of

Microbiology, Immunology & Molecular Genetics, University of California, Los

Angeles, CA 90095, USA yxing@ucla.edu.

RNA-binding proteins (RBPs) play a critical role in the regulation of alternative

splicing (AS), a prevalent mechanism for generating transcriptomic and proteomic

diversity in eukaryotic cells. Studies have shown that AS can be regulated by

RBPs in a binding-site-position dependent manner. Depending on where RBPs bind,

splicing of an alternative exon can be enhanced or suppressed. Therefore, spatial

analyses of RBP motifs and binding sites around alternative exons will help

elucidate splicing regulation by RBPs. The development of high-throughput

sequencing technologies has allowed transcriptome-wide analyses of AS and RBP-RNA

interactions. Given a set of differentially regulated alternative exons obtained

from RNA sequencing (RNA-seq) experiments, the rMAPS web server

(http://rmaps.cecsresearch.org) performs motif analyses of RBPs in the vicinity

of alternatively spliced exons and creates RNA maps that depict the spatial

patterns of RBP motifs. Similarly, rMAPS can also perform spatial analyses of

RBP-RNA binding sites identified by cross-linking immunoprecipitation sequencing

(CLIP-seq) experiments. We anticipate rMAPS will be a useful tool for elucidating

RBP regulation of alternative exon splicing using high-throughput sequencing

data.

© The Author(s) 2016. Published by Oxford University Press on behalf of Nucleic

Acids Research.

DOI: 10.1093/nar/gkw410

PMCID: PMC4987942

PMID: 27174931

166. Nucleic Acids Res. 2016 Jul 8;44(W1):W401-5. doi: 10.1093/nar/gkw332. Epub 2016

May 12.

PSSweb: protein structural statistics web server.

Gaillard T(1), Stote RH(2), Dejaegere A(2).

Author information:

(1)Laboratoire de Biochimie, École Polytechnique, CNRS, Université Paris-Saclay,

91128 Palaiseau cedex, France thomas.gaillard@polytechnique.edu. (2)Department of

Integrative Structural Biology, Institut de Génétique et de Biologie Moléculaire

et Cellulaire, Institut National de la Santé et de la Recherche Médicale U964,

Centre National de la Recherche Scientifique UMR 7104, Université de Strasbourg,

67404 Illkirch, France.

With the increasing number of protein structures available, there is a need for

tools capable of automating the comparison of ensembles of structures, a common

requirement in structural biology and bioinformatics. PSSweb is a web server for

protein structural statistics. It takes as input an ensemble of PDB files of

protein structures, performs a multiple sequence alignment and computes

structural statistics for each position of the alignment. Different optional

functionalities are proposed: structure superposition, Cartesian coordinate

statistics, dihedral angle calculation and statistics, and a cluster analysis

based on dihedral angles. An interactive report is generated, containing a

summary of the results, tables, figures and 3D visualization of superposed

structures. The server is available at http://pssweb.org.

© The Author(s) 2016. Published by Oxford University Press on behalf of Nucleic

Acids Research.

DOI: 10.1093/nar/gkw332

PMCID: PMC4987900

PMID: 27174930

167. Nucleic Acids Res. 2016 Jul 8;44(W1):W344-50. doi: 10.1093/nar/gkw408. Epub 2016

May 10.

ConSurf 2016: an improved methodology to estimate and visualize evolutionary

conservation in macromolecules.

Ashkenazy H(1), Abadi S(2), Martz E(3), Chay O(4), Mayrose I(5), Pupko T(6),

Ben-Tal N(7).

Author information:

(1)Department of Cell Research and Immunology, George S. Wise Faculty of Life

Sciences, Tel Aviv University, Tel Aviv 69978, Israel. (2)Department of Molecular

Biology and Ecology of Plants, George S. Wise Faculty of Life Sciences, Tel Aviv

University, Tel Aviv 69978, Israel. (3)Department of Microbiology, University of

Massachusetts, Amherst, MA 01003, USA. (4)Department of Cell Research and

Immunology, George S. Wise Faculty of Life Sciences, Tel Aviv University, Tel

Aviv 69978, Israel Department of Molecular Biology and Ecology of Plants, George

S. Wise Faculty of Life Sciences, Tel Aviv University, Tel Aviv 69978, Israel

Department of Biochemistry and Molecular Biology, George S. Wise Faculty of Life

Sciences, Tel Aviv University, Tel Aviv 69978, Israel. (5)Department of Molecular

Biology and Ecology of Plants, George S. Wise Faculty of Life Sciences, Tel Aviv

University, Tel Aviv 69978, Israel itaymay@post.tau.ac.il. (6)Department of Cell

Research and Immunology, George S. Wise Faculty of Life Sciences, Tel Aviv

University, Tel Aviv 69978, Israel talp@post.tau.ac.il. (7)Department of

Biochemistry and Molecular Biology, George S. Wise Faculty of Life Sciences, Tel

Aviv University, Tel Aviv 69978, Israel bental@tauex.tau.ac.il.

The degree of evolutionary conservation of an amino acid in a protein or a

nucleic acid in DNA/RNA reflects a balance between its natural tendency to mutate

and the overall need to retain the structural integrity and function of the

macromolecule. The ConSurf web server (http://consurf.tau.ac.il), established

over 15 years ago, analyses the evolutionary pattern of the amino/nucleic acids

of the macromolecule to reveal regions that are important for structure and/or

function. Starting from a query sequence or structure, the server automatically

collects homologues, infers their multiple sequence alignment and reconstructs a

phylogenetic tree that reflects their evolutionary relations. These data are then

used, within a probabilistic framework, to estimate the evolutionary rates of

each sequence position. Here we introduce several new features into ConSurf,

including automatic selection of the best evolutionary model used to infer the

rates, the ability to homology-model query proteins, prediction of the secondary

structure of query RNA molecules from sequence, the ability to view the

biological assembly of a query (in addition to the single chain), mapping of the

conservation grades onto 2D RNA models and an advanced view of the phylogenetic

tree that enables interactively rerunning ConSurf with the taxa of a sub-tree.

© The Author(s) 2016. Published by Oxford University Press on behalf of Nucleic

Acids Research.

DOI: 10.1093/nar/gkw408

PMCID: PMC4987940

PMID: 27166375

168. Nucleic Acids Res. 2016 Jul 8;44(W1):W455-62. doi: 10.1093/nar/gkw403. Epub 2016

May 10.

GPCR-ModSim: A comprehensive web based solution for modeling G-protein coupled

receptors.

Esguerra M(1), Siretskiy A(1), Bello X(2), Sallander J(1), Gutiérrez-de-Terán

H(3).

Author information:

(1)Department of Cell and Molecular Biology, Uppsala University, Biomedical

Center, Box 596, SE-751 24, Uppsala, Sweden. (2)Fundación Pública Galega de

Medicina Xenómica, Hospital Clínico Universitario de Santiago, Santiago de

Compostela, 15706, Spain. (3)Department of Cell and Molecular Biology, Uppsala

University, Biomedical Center, Box 596, SE-751 24, Uppsala, Sweden

hugo.gutierrez@icm.uu.se.

GPCR-ModSim (http://open.gpcr-modsim.org) is a centralized and easy to use

service dedicated to the structural modeling of G-protein Coupled Receptors

(GPCRs). 3D molecular models can be generated from amino acid sequence by

homology-modeling techniques, considering different receptor conformations.

GPCR-ModSim includes a membrane insertion and molecular dynamics (MD)

equilibration protocol, which can be used to refine the generated model or any

GPCR structure uploaded to the server, including if desired non-protein elements

such as orthosteric or allosteric ligands, structural waters or ions. We herein

revise the main characteristics of GPCR-ModSim and present new functionalities.

The templates used for homology modeling have been updated considering the latest

structural data, with separate profile structural alignments built for inactive,

partially-active and active groups of templates. We have also added the

possibility to perform multiple-template homology modeling in a unique and

flexible way. Finally, our new MD protocol considers a series of distance

restraints derived from a recently identified conserved network of helical

contacts, allowing for a smoother refinement of the generated models which is

particularly advised when there is low homology to the available templates. GPCR-

ModSim has been tested on the GPCR Dock 2013 competition with satisfactory

results.

© The Author(s) 2016. Published by Oxford University Press on behalf of Nucleic

Acids Research.

DOI: 10.1093/nar/gkw403

PMCID: PMC4987938

PMID: 27166369

169. Nucleic Acids Res. 2016 Jul 8;44(W1):W267-71. doi: 10.1093/nar/gkw407. Epub 2016

May 10.

Breaking-Cas-interactive design of guide RNAs for CRISPR-Cas experiments for

ENSEMBL genomes.

Oliveros JC(1), Franch M(1), Tabas-Madrid D(1), San-León D(1), Montoliu L(2),

Cubas P(1), Pazos F(3).

Author information:

(1)National Centre for Biotechnology (CNB-CSIC), c/ Darwin 3, 28049 Madrid,

Spain. (2)National Centre for Biotechnology (CNB-CSIC), c/ Darwin 3, 28049

Madrid, Spain CIBERER, ISCIII, Madrid, Spain. (3)National Centre for

Biotechnology (CNB-CSIC), c/ Darwin 3, 28049 Madrid, Spain pazos@cnb.csic.es.

The CRISPR/Cas technology is enabling targeted genome editing in multiple

organisms with unprecedented accuracy and specificity by using RNA-guided

nucleases. A critical point when planning a CRISPR/Cas experiment is the design

of the guide RNA (gRNA), which directs the nuclease and associated machinery to

the desired genomic location. This gRNA has to fulfil the requirements of the

nuclease and lack homology with other genome sites that could lead to off-target

effects. Here we introduce the Breaking-Cas system for the design of gRNAs for

CRISPR/Cas experiments, including those based in the Cas9 nuclease as well as

others recently introduced. The server has unique features not available in other

tools, including the possibility of using all eukaryotic genomes available in

ENSEMBL (currently around 700), placing variable PAM sequences at 5' or 3' and

setting the guide RNA length and the scores per nucleotides. It can be freely

accessed at: http://bioinfogp.cnb.csic.es/tools/breakingcas, and the code is

available upon request.

© The Author(s) 2016. Published by Oxford University Press on behalf of Nucleic

Acids Research.

DOI: 10.1093/nar/gkw407

PMCID: PMC4987939

PMID: 27166368

170. Nucleic Acids Res. 2016 Jul 8;44(W1):W46-53. doi: 10.1093/nar/gkw394. Epub 2016

May 6.

Comparative transcriptomics across the prokaryotic tree of life.

Cohen O(1), Doron S(2), Wurtzel O(3), Dar D(2), Edelheit S(2), Karunker I(2),

Mick E(4), Sorek R(5).

Author information:

(1)Department of Molecular Genetics, Weizmann Institute of Science, Rehovot

76100, Israel Broad Institute of Harvard and MIT, Cambridge, MA 02142, USA.

(2)Department of Molecular Genetics, Weizmann Institute of Science, Rehovot

76100, Israel. (3)Department of Molecular Genetics, Weizmann Institute of

Science, Rehovot 76100, Israel Whitehead Institute for Biomedical Research,

Cambridge, MA 02142, USA. (4)Department of Molecular Genetics, Weizmann Institute

of Science, Rehovot 76100, Israel Department of Systems Biology, Harvard Medical

School, Boston, MA 02115, USA. (5)Department of Molecular Genetics, Weizmann

Institute of Science, Rehovot 76100, Israel rotem.sorek@weizmann.ac.il.

Whole-transcriptome sequencing studies from recent years revealed an unexpected

complexity in transcriptomes of bacteria and archaea, including abundant

non-coding RNAs, cis-antisense transcription and regulatory untranslated regions

(UTRs). Understanding the functional relevance of the plethora of non-coding RNAs

in a given organism is challenging, especially since some of these RNAs were

attributed to 'transcriptional noise'. To allow the search for conserved

transcriptomic elements we produced comparative transcriptome maps for multiple

species across the microbial tree of life. These transcriptome maps are detailed

in annotations, comparable by gene families, and BLAST-searchable by user

provided sequences. Our transcriptome collection includes 18 model organisms

spanning 10 phyla/subphyla of bacteria and archaea that were sequenced using

standardized RNA-seq methods. The utility of the comparative approach, as

implemented in our web server, is demonstrated by highlighting genes with

exceptionally long 5'UTRs across species, which correspond to many known

riboswitches and further suggest novel putative regulatory elements. Our study

provides a standardized reference transcriptome to major clinically and

environmentally important microbial phyla. The viewer is available at

http://exploration.weizmann.ac.il/TCOL, setting a framework for comparative

studies of the microbial non-coding genome.

© The Author(s) 2016. Published by Oxford University Press on behalf of Nucleic

Acids Research.

DOI: 10.1093/nar/gkw394

PMCID: PMC4987935

PMID: 27154273

171. Nucleic Acids Res. 2016 Jul 8;44(W1):W557-61. doi: 10.1093/nar/gkw390. Epub 2016

May 5.

CSM-lig: a web server for assessing and comparing protein-small molecule

affinities.

Pires DE(1), Ascher DB(2).

Author information:

(1)Centro de Pesquisas René Rachou, Fundação Oswaldo Cruz, Belo Horizonte,

30190-002, Brazil douglas.pires@cpqrr.fiocruz.br. (2)Centro de Pesquisas René

Rachou, Fundação Oswaldo Cruz, Belo Horizonte, 30190-002, Brazil Department of

Biochemistry, University of Cambridge, Cambridge, CB2 1GA, UK Department of

Biochemistry, University of Melbourne, Victoria 3010, Australia

dascher@svi.edu.au.

Determining the affinity of a ligand for a given protein is a crucial component

of drug development and understanding their biological effects. Predicting

binding affinities is a challenging and difficult task, and despite being

regarded as poorly predictive, scoring functions play an important role in the

analysis of molecular docking results. Here, we present CSM-Lig

(http://structure.bioc.cam.ac.uk/csm_lig), a web server tailored to predict the

binding affinity of a protein-small molecule complex, encompassing both protein

and small-molecule complementarity in terms of shape and chemistry via

graph-based structural signatures. CSM-Lig was trained and evaluated on different

releases of the PDBbind databases, achieving a correlation of up to 0.86 on

10-fold cross validation and 0.80 in blind tests, performing as well as or better

than other widely used methods. The web server allows users to rapidly and

automatically predict binding affinities of collections of structures and assess

the interactions made. We believe CSM-lig would be an invaluable tool for helping

assess docking poses, the effects of multiple mutations, including insertions,

deletions and alternative splicing events, in protein-small molecule affinity,

unraveling important aspects that drive protein-compound recognition.

© The Author(s) 2016. Published by Oxford University Press on behalf of Nucleic

Acids Research.

DOI: 10.1093/nar/gkw390

PMCID: PMC4987933

PMID: 27151202

172. Nucleic Acids Res. 2016 Jul 8;44(W1):W375-82. doi: 10.1093/nar/gkw383. Epub 2016

May 5.

NAPS: Network Analysis of Protein Structures.

Chakrabarty B(1), Parekh N(2).

Author information:

(1)Centre for Computational Natural Sciences and Bioinformatics, International

Institute of Information Technology, Hyderabad 500032, India. (2)Centre for

Computational Natural Sciences and Bioinformatics, International Institute of

Information Technology, Hyderabad 500032, India nita@iiit.ac.in.

Traditionally, protein structures have been analysed by the secondary structure

architecture and fold arrangement. An alternative approach that has shown promise

is modelling proteins as a network of non-covalent interactions between amino

acid residues. The network representation of proteins provide a systems approach

to topological analysis of complex three-dimensional structures irrespective of

secondary structure and fold type and provide insights into structure-function

relationship. We have developed a web server for network based analysis of

protein structures, NAPS, that facilitates quantitative and qualitative (visual)

analysis of residue-residue interactions in: single chains, protein complex,

modelled protein structures and trajectories (e.g. from molecular dynamics

simulations). The user can specify atom type for network construction, distance

range (in Å) and minimal amino acid separation along the sequence. NAPS provides

users selection of node(s) and its neighbourhood based on centrality measures,

physicochemical properties of amino acids or cluster of well-connected residues

(k-cliques) for further analysis. Visual analysis of interacting domains and

protein chains, and shortest path lengths between pair of residues are additional

features that aid in functional analysis. NAPS support various analyses and

visualization views for identifying functional residues, provide insight into

mechanisms of protein folding, domain-domain and protein-protein interactions for

understanding communication within and between proteins.

URL:http://bioinf.iiit.ac.in/NAPS/.

© The Author(s) 2016. Published by Oxford University Press on behalf of Nucleic

Acids Research.

DOI: 10.1093/nar/gkw383

PMCID: PMC4987928

PMID: 27151201

173. Nucleic Acids Res. 2016 Jul 8;44(W1):W395-400. doi: 10.1093/nar/gkw395. Epub 2016

May 5.

RCD+: Fast loop modeling server.

López-Blanco JR(1), Canosa-Valls AJ(1), Li Y(2), Chacón P(3).

Author information:

(1)Department of Biological Chemical Physics, Rocasolano Physical Chemistry

Institute C.S.I.C., Serrano 119, 28006 Madrid, Spain. (2)Department of Computer

Science, Old Dominion University, Norfolk, VA 23529, USA. (3)Department of

Biological Chemical Physics, Rocasolano Physical Chemistry Institute C.S.I.C.,

Serrano 119, 28006 Madrid, Spain pablo@chaconlab.org.

Modeling loops is a critical and challenging step in protein modeling and

prediction. We have developed a quick online service (http://rcd.chaconlab.org)

for ab initio loop modeling combining a coarse-grained conformational search with

a full-atom refinement. Our original Random Coordinate Descent (RCD) loop closure

algorithm has been greatly improved to enrich the sampling distribution towards

near-native conformations. These improvements include a new workflow

optimization, MPI-parallelization and fast backbone angle sampling based on

neighbor-dependent Ramachandran probability distributions. The server starts by

efficiently searching the vast conformational space from only the loop sequence

information and the environment atomic coordinates. The generated closed loop

models are subsequently ranked using a fast distance-orientation dependent energy

filter. Top ranked loops are refined with the Rosetta energy function to obtain
[truncated: 7,074,093 more chars]
