# Supplementary material for: A snapshot of 3649 Web-based services published between 1994 and 2017 shows a decrease in availability after 2 years
Source: Oxford University Press journal article supplement (doi:10.1093/bib/bbx159), 2017-11-02
Supplement: bbx159_supp_file2.docx [file bbx159_supp_file2.docx]

**Supplemental File 2**

**Title:**

A snapshot of 3,649 web-based services published between 1994 and 2017 shows a decrease in availability after two years

**Authors:**

Ágnes Ősz, Lőrinc Sándor Pongor, Danuta Szirmai, Balázs Győrffy

**Description:**

Parses Pubmed abstract file, and outputs

#basic info of every article such as PMID, PMCID, journal name, publication year, Title, DOI, URL

**Usage:**

perl parser.pl <input PUBMED abstract file>

**Requirements:**

Parser input file

**Script:**

====================================================================

#DOI number, issue of journal, and url if present in abstract

use strict; use warnings;

#Stores current Pubmed article entry read

my @entry;

#Print header of output table

print "Journal\tYear\tPMID\tPMCID\tDOI\tissue\ttitle\turl\ttext\n";

#read pubmed abstract file, line-by-line with while() cycle

open FH, $ARGV[0] or die; #open file

while(<FH>) { #iterate through file

chomp($_); #remove whitespace

if($_ =~ m/(^\d+|^\d)(\.\ )(.+)/ && index($_, "©") == -1) { #check if line is new entry

if($#entry > 1) { #check if number of lines from previous entry is more than 1

ParseEntry(@entry); #parse previous entry

}

undef(@entry); #empty entry array

}

push @entry, $_; #add new entry line to array

}

close(FH); #close file

#parser sub-routine: Parses entry read in main cycle

sub ParseEntry {

my @data = @_; #get input array from @_ variable

my $journal; #stores journal name

my $title; #stores article title

my $year; #stores publication year

my $issue; #stores journal issue

my $pmid; #stores PUBMED ID

my $pmcid; #stores PMC ID

my @https; #stores http address from abstract

my @wwws; #stores stores www address from abstract

my $doi; #stores DOI number of article

my $abstract; #stores abstract, for address extraction

#parses header section of entry

if($data[0] =~ m/(^\d+|^\d)(\.\ )(.+)/ && index($_, "©") == -1) {

my @tok = split /\./, $3;

my @additional = split /\;/, $tok[1];

my @sp = split " ", $additional[0];

$journal = $tok[0]; #journal name

$year = $additional[0]; #publication year

$year =~ s/[a-zA-Z]+//g;

$year =~ s/ //g;

$year = substr($year, 0, 4);

$issue = $additional[1]; #journal issue

}

my $linecount = 0;

#extracts abstract from entry

for(my $i = 0; $i <= $#data; $i++) {

$data[$i] =~ s/\"//g;

if($linecount == 1) {

if(!defined $title) {

$title = $data[$i];

}

else {

$title = $title." ".$data[$i];

}

}

if($linecount == 4) {

if(!defined $abstract) {

$abstract = $data[$i];

}

else {

$abstract = $abstract." ".$data[$i];

}

}

if(length($data[$i]) < 1) {

$linecount++;

}

}

@https = ReturnHttp($abstract); #checks for http address, and returns value

@wwws = ReturnWww($abstract); #checks for www address, and returns value

push(@https, @wwws); #concatenates the arrays

my $longest = 0;

my $long_index = 0;

#extracts longest http or www address

for(my $i = 0; $i < $#https; $i = $i + 2) {

if(length($https[$i]) > $longest) {

$long_index = $i;

$longest = length($https[$i]);

}

}

#Extracts PMID, PMCID and DOI numbers using regexp

for(my $i = 3; $i <= $#data; $i++) {

if($data[$i] =~ m/(^PMID\: )(\d+)(.+)/) {

$pmid = $2;

}

elsif($data[$i] =~ m/(^PMCID\: )(.+)/) {

my @temp = split " ", $2;

$pmcid = $temp[0];

}

elsif($data[$i] =~ m/(^DOI\: )(.+)/) {

$doi = $2;

}

}

while($https[$long_index] =~ m/(.+)([\.\,\)]$)/) {

$https[$long_index] = substr($https[$long_index], 0, length($https[$long_index]) - 1);

}

#print extracted data, if found (or defined)

if(defined $journal) {

print "$journal"; #print journal name

}

print "\t";

if(defined $year) {

print "$year"; #print publication year

}

print "\t";

if(defined $pmid) {

print "$pmid"; #print pubmed id

}

print "\t";

if(defined $pmcid) {

print "$pmcid"; #print pmc id

}

print "\t";

if(defined $doi) {

print "$doi"; #print doi number

}

print "\t";

if(defined $issue) {

print "$issue"; #print journal issue

}

print "\t";

if(defined $title) {

print $title; #print article title

}

print "\t";

if(defined $https[$long_index]) {

print "$https[$long_index]"; #print http address

}

print "\t";

if(defined $https[$long_index + 1]) {

print "$https[$long_index + 1]"; #print www address

}

print "\n";

}

#returns fraction of abstract starting with http, and separated by space

sub ReturnHttp {

my $in = $_[0];

my @res;

my $j = 0;

while(index($in, "http") != -1) {

$in = substr($in, index($in, "http"));

my @tok = split " ", $in;

my $short = substr($in, 0, length($tok[0]) + 10);

push @res, $tok[0];

push @res, $short;

$in = substr($in, 1);

$j++;

}

return @res;

}

#returns fraction of abstract starting with http, and separated by space

sub ReturnWww {

my $in = $_[0];

my @res;

my $j = 0;

while(index($in, "www") != -1) {

$in = substr($in, index($in, "www"));

my @tok = split " ", $in;

my $short = substr($in, 0, length($tok[0]) + 10);

push @res, $tok[0];

push @res, $short;

$in = substr($in, 1);

$j++;

}

return @res;

}
