# Supplementary material for: A snapshot of 3649 Web-based services published between 1994 and 2017 shows a decrease in availability after 2 years
Source: Oxford University Press journal article supplement (doi:10.1093/bib/bbx159), 2017-11-02
Supplement: bbx159_supp_table1.xlsx [file bbx159_supp_table1.xlsx]

## Sheet: web services
Supplemental Table 1
Title:
A snapshot of 3,649 web-based services published between 1994 and 2017 shows a decrease in availability after two years
Authors:
Ágnes Ősz, Lőrinc Sándor Pongor, Danuta Szirmai, Balázs Győrffy
Description:
Results of the scripst: Parser output file and results of Ping script
Usage:
Manual screening and statistical analysis
PMID	Year	Journal	Impact factor (2015)	Overall cited by	Continent	PMCID	DOI	Issue	Title	URL	Text	New link	Status by automatic screening	Status check time	code	message
7498160	1995	Electrophoresis	2.482	20	North Am	NA	10.1002/elps.11501601193	16(7):1170-4	A Saccharomyces cerevisiae Internet protein resource now available.	http:@siva.cshl.org	http::@siva.cshl.org). YPD is av:	NA	0	2017:2:7:11:19:10	500	No Host option provided
7937068	1994	Nucleic Acids Res	9.202	29	Europe	PMC308330	NA	22(17):3610-5	The SBASE protein domain library, release 3.0: a collection of annotated protein sequence segments.	http://pongor.itk.ppke.hu/protein/sbase.html#/sbase_summary	http::@www.icgeb.trieste.it >. Automa:	http://pongor.itk.ppke.hu/protein/sbase.html#/sbase_summary	1	2017:2:7:11:19:11	200	OK
8043953	1994	Mamm Genome	2.078	9	North Am	NA	10.1007/BF00356557	5(6):372-5	The Portable Dictionary of the Mouse Genome: a personal database for gene mapping and molecular biology.	http://mickey.utmem.edu/front.html	NA	NA	0	2017:2:7:11:19:11	500	Can't connect to mickey.utmem.edu:80
8594562	1996	Nucleic Acids Res	9.202	30	Europe	PMC145568	10.1093/nar/24.1.132	24(1):132-6	A cholinesterase genes server (ESTHER): a database of cholinesterase-related sequences for multiple alignments, phylogenetic relationships, mutations and structural data retrieval.	http://www.montpellier.inra.fr:70/cholinesterase	http://www.montpellier.inra.fr::70/cholinesterase.	NA	0	2017:2:7:11:19:11	500	Can't connect to www.montpellier.inra.fr:70
8594576	1996	Nucleic Acids Res	9.202	22	Europe	PMC145564	10.1093/nar/24.1.182	24(1):182-8	Progress with the PRINTS protein fingerprint database.	http://www.bioinf.man.ac.uk/dbbrowser/	http://www.biochem.ucl.ac.uk/bsm/dbbrowser .	http://www.bioinf.man.ac.uk/dbbrowser/	1	2017:2:7:11:19:31	200	OK
8594582	1996	Nucleic Acids Res	9.202	12	Europe	PMC145610	10.1093/nar/24.1.210	24(1):210-3	The SBASE protein domain library, Release 4.0: a collection of annotated protein sequence segments.	ftp.icgeb.trieste.it	http://www.icgeb.trieste.it. Automated:	ftp.icgeb.trieste.it	0	2017:2:7:11:19:31	400	URL must be absolute
8594586	1996	Nucleic Acids Res	9.202	47	Europe	PMC145615	10.1093/nar/24.1.221	24(1):221-2	The ENZYME data bank in 1995.	http://enzyme.expasy.org/	http://expasy.hcuge.ch/).	http://enzyme.eNApasy.org/	1	2017:2:7:11:19:31	200	OK
8594608	1996	Nucleic Acids Res	9.202	428	North Am	PMC145599	10.1093/nar/24.1.82	24(1):82-5	The Ribosomal Database Project (RDP).	http://rdp.cme.msu.edu/	http://rdpwww.life.uiuc.edu/). The elect:	http://rdp.cme.msu.edu/	1	2017:2:7:11:19:32	200	OK
8633428	1996	AJR Am J Roentgenol	NA	5	North Am	NA	10.2214/ajr.166.6.8633428	166(6):1265-7	Efficient searching for specific resources on the World-Wide Web: creation of a search server for radiologists.	http://glimpse.cs.arizona.edu/radiology.html	http://glimpse.cs.arizona.edu/radiology.html. CONCLUSIO:	NA	0	2017:2:7:11:19:32	404	Not Found
8654966	1996	Gene	2.319	3	North Am	NA	NA	172(1):GC43-50	Adapting EcoCyc for use on the World Wide Web.	www.ai.sri.com/ecocyc/browser.html	www.ai.sri.com/ecocyc/browser.html. We have m	NA	1	2017:2:7:11:19:33	200	OK
8683587	1996	J Mol Biol	4.517	11	North Am	NA	10.1006/jmbi.1996.0362	259(4):840-54	FASTA-SWAP and FASTA-PAT: pattern database searches using combinations of aligned amino acids, and a novel scoring theory.	http://dot.imgen.bcm.tmc.edu:9331/seq-search/Op	http://dot.imgen.bcm.tmc.edu::9331/seq-search/Op tions/fas:	NA	0	2017:2:7:11:19:34	500	Can't connect to dot.imgen.bcm.tmc.edu:9331
8743995	1996	Genome Res	11.351	299	North Am	NA	NA	6(5):454-62	BCM Search Launcher--an integrated interface to molecular biology data base search and analysis services available on the World Wide Web.	http:@gc.bcm.tmc.edu:8088/search-launcher.html	http::@gc.bcm.tmc.edu::8088/search-launcher.html.	NA	0	2017:2:7:11:19:54	500	No Host option provided
8872392	1996	Comput Appl Biosci	NA	6	Asia	NA	NA	12(3):231-5	Development of an animal genome database and its search system.	http://ws4.niai.affrc.go.jp/	http://ws4.niai.affrc.go.jp/) and the e:	NA	0	2017:2:7:11:19:54	500	Can't connect to ws4.niai.affrc.go.jp:80
8872393	1996	Comput Appl Biosci	NA	6	Europe	NA	NA	12(3):237-40	The directory of P450-containing systems on WorldWide Web.	http://www.icgeb.trieste.it/p450/	http://www.icgeb.trieste.it/p450/ >. Curren:	NA	1	2017:2:7:11:19:55	200	OK
8902356	1996	Comput Appl Biosci	NA	1	Europe	NA	NA	12(4):297-301	GEOMETRY: a software package for nucleotide sequence analysis using statistical geometry in sequence space.	http://@www.ebi.ac.uk	http://@www.ebi.ac.uk)	NA	1	2017:2:7:11:19:55	200	OK
8931139	1996	Protein Sci	3.039	138	Europe	PMC2143287	10.1002/pro.5560051107	5(11):2203-16	Cleavage site analysis in picornaviral polyproteins: discovering cellular targets by neural networks.	http://www.cbs.dtu.dk/services/NetPicoRNA/	http::@www.cbs.dtu.dk/services/NetPicoRNA/.	http://www.cbs.dtu.dk/services/NetPicoRNA/	1	2017:2:7:11:19:55	200	OK
8947749	1996	Proc AMIA Annu Fall Symp	NA	3	Europe	PMC2233219	NA	NA	The SentiWeb method for exploring a database on the Net.	http://www.b3e.jussieu.fr	NA	NA	0	2017:2:7:11:19:57	500	Can't connect to www.b3e.jussieu.fr:80
9014239	1996	Receptors Channels	NA	35	Europe	NA	NA	4(3):161-4	Automated modelling of the transmembrane region of G-protein coupled receptor by Swiss-model.	https://swissmodel.expasy.org/interactive	http://expasy.hcuge.ch/swissmod/SWISS-MODEL.++ +html.	https://swissmodel.eNApasy.org/interactive	1	2017:2:7:11:19:57	200	OK
9016498	1997	Nucleic Acids Res	9.202	189	Europe	PMC146421	10.1093/nar/25.1.28	25(1):28-30	MIPS: a database for protein sequences, homology data and yeast genome information.	http://www.mips.biochem.mpg.de/	http://www.mips.biochem.mpg.de/ ) MIPS pe:	NA	0	2017:2:7:11:19:57	500	Can't connect to www.mips.biochem.mpg.de:80
9016515	1997	Nucleic Acids Res	9.202	703	North Am	PMC146422	10.1093/nar/25.1.109	25(1):109-11	The RDP (Ribosomal Database Project).	http://rdp.cme.msu.edu/	http://rdpwww.life.uiuc.edu/ ). The el:	http://rdp.cme.msu.edu/	1	2017:2:7:11:19:57	200	OK
9016517	1997	Nucleic Acids Res	9.202	28	Europe	PMC146373	10.1093/nar/25.1.117	25(1):117-22	Database on the structure of large ribosomal subunit RNA.	http://rrna.uia.ac.be/	http://rrna.uia.ac.be/ provides	NA	0	2017:2:7:11:20:19	500	Can't connect to rrna.uia.ac.be:80
9016538	1997	Nucleic Acids Res	9.202	45	Europe	PMC146411	10.1093/nar/25.1.212	25(1):212-7	Novel developments with the PRINTS protein fingerprint database.	http://www.bioinf.man.ac.uk/dbbrowser/	http://www.biochem.ucl.ac.uk/bsm/dbbrowser++ +/CINEMA	http://www.bioinf.man.ac.uk/dbbrowser/	1	2017:2:7:11:20:19	200	OK
9016545	1997	Nucleic Acids Res	9.202	19	Europe	PMC146372	10.1093/nar/25.1.240	25(1):240-3	The SBASE protein domain library, release 5.0: a collection of annotated protein sequence segments.	http://www.icgeb.trieste.it/sbase/	http://www.icgeb.trieste.it/sbase/ >. and wi:	NA	0	2017:2:7:11:20:19	404	Not Found
9021269	1996	Comput Appl Biosci	NA	41	Europe	NA	NA	12(6):507-10	LALNVIEW: a graphical viewer for pairwise sequence alignments.	http://	http:// expasy.hc	NA	0	2017:2:7:11:20:19	500	No Host option provided
9021271	1996	Comput Appl Biosci	NA	38	Europe	NA	NA	12(6):519-24	Correspondence discriminant analysis: a multivariate method for comparing classes of protein and nucleic acid sequences.	http://pbil.univ-lyon1.fr/ADE-4/	http://biomserv.univ-lyonl.fr/ADE-4.html). These pro	http://pbil.univ-lyon1.fr/ADE-4/	1	2017:2:7:11:20:19	200	OK
9109388	1997	FEBS Lett	3.519	31	Europe	NA	10.1016/S0014-5793(97)00236-6	406(1-2):69-74	Distribution of sequence-dependent curvature in genomic DNA sequences.	http://icgeb.trieste.it/dna/curve_it.html/	http://icgeb.trieste.it/dna/curve_it.html/)..	NA	0	2017:2:7:11:20:19	500	Can't connect to icgeb.trieste.it:80
9150918	1997	Electrophoresis	2.482	217	Europe	NA	10.1002/elps.1150180314	18(3-4):403-8	Detailed peptide characterization using PEPTIDEMASS--a World-Wide-Web-accessible tool.	http://www.expasy.ch/www/tools.html	http://www.expasy.ch/www/tools.html.	NA	1	2017:2:7:11:20:19	200	OK
9150930	1997	Electrophoresis	2.482	39	Europe	NA	10.1002/elps.1150180326	18(3-4):498-501	Large-scale protein modelling and integration with the SWISS-PROT and SWISS-2DPAGE databases: the example of Escherichia coli.	http://world-2dpage.expasy.org/swiss-2dpage/; https:://swissmodel.expasy.org/repository/	http://expasy.hcuge.ch). Here we p:	http://world-2dpage.eNApasy.org/swiss-2dpage/; https://swissmodel.eNApasy.org/repository/	0	2017:2:7:11:20:20	404	Not Found
9172353	1997	Appl Environ Microbiol	NA	35	North Am	PMC168526	NA	63(6):2338-46	A new computational method for detection of chimeric 16S rRNA artifacts generated by PCR amplification from mixed bacterial populations.	http://www-hto.usc.edu/software/mglobal	http://www-hto.usc.edu/software/mglobal CHI.	NA	0	2017:2:7:11:20:20	500	Can't connect to www-hto.usc.edu:80
9177000	1997	J Chem Inf Comput Sci	NA	33	Europe	NA	NA	37(3):417-24	The PRINTS database of protein fingerprints: a novel information resource for computational molecular biology.	www.biochem.ucl.ac.uk/bsm/dbbrowser/	www.biochem.ucl.ac.uk/bsm/dbbrowser/. We descri	NA	1	2017:2:7:11:20:21	200	OK
9183529	1997	Comput Appl Biosci	NA	54	Europe	NA	NA	13(3):249-56	Match-Box_server: a multiple sequence alignment tool placing emphasis on reliability.	http://www.fundp.ac.be/sciences/biologie/bms/+	http://www.fundp.ac.be/sciences/biologie/bms/+ ++matchbo:	NA	0	2017:2:7:11:20:21	404	Not Found
9252112	1997	Biochim Biophys Acta	NA	5	Europe	NA	10.1016/S0167-4838(97)00050-2	1340(2):253-67	Computer analysis of phytochrome sequences and reevaluation of the phytochrome secondary structure by Fourier transform infrared spectroscopy.	http://www.imb-jena.de/PHYTO.html	http://www.imb-jena.de/PHYTO.html). It can be:	NA	0	2017:2:7:11:20:21	404	Not Found
9322034	1997	Proc Int Conf Intell Syst Mol Biol	NA	66	Europe	NA	NA	5:187-90	ANOLEA: a www server to assess protein structures.	http://melolab.org/anolea/	http::@www.fundp.ac.be/pub/ANOLEA.html.	http://melolab.org/anolea/	1	2017:2:7:11:20:22	200	OK
9322042	1997	Proc Int Conf Intell Syst Mol Biol	NA	20	Europe	NA	NA	5:234-6	Large scale protein modelling and model repository.	https://www.expasy.org/	http://www.expasy.ch).	https://www.eNApasy.org/	1	2017:2:7:11:20:24	200	OK
9329089	1997	Proteins	2.499	40	Europe	NA	10.1002/(SICI)1097-0134(199710)29:2<252::AID-PROT12>3.0.CO;2-N	29(2):252-7	SAmBA: an interactive software for optimizing the design of biological macromolecules crystallization experiments.	http://www.igs.cnrs-mrs.fr/samba/	http://igs-server.cnrs-mrs.fr.	http://www.igs.cnrs-mrs.fr/samba/	1	2017:2:7:11:20:24	200	OK
9342339	1997	Proc Natl Acad Sci U S A	NA	99	North Am	PMC23659	10.1073/pnas.94.22.11929	94(22):11929-34	Assigning folds to the proteins encoded by the genome of Mycoplasma genitalium.	http://www.doe-mbi.ucla.edu/frsur/frsur.html	http://www.doe-mbi.ucla.edu/people/frsvr/ frsvr. ht:	NA	0	2017:2:7:11:20:24	404	Not Found
9399790	1998	Nucleic Acids Res	9.202	312	North Am	PMC147205	10.1093/nar/26.1.1	26(1):1-7	GenBank.	http://www.ncbi.nlm.nih.gov/	http://www.ncbi.nlm.nih.gov/) incorpora:	NA	1	2017:2:7:11:20:25	200	OK
9399795	1998	Nucleic Acids Res	9.202	67	Europe	PMC147239	10.1093/nar/26.1.33	26(1):33-7	MIPS: a database for protein sequences and complete genomes.	http://www.mips.biochem.mpg.de	http://www.mips.biochem.mpg.de ) MIPS pr:	NA	0	2017:2:7:11:20:26	500	Can't connect to www.mips.biochem.mpg.de:80
9399809	1998	Nucleic Acids Res	9.202	5	Europe	PMC147227	10.1093/nar/26.1.100	26(1):100-1	Virgil: a database of rich links between GDB and GenBank.	http://www.infobiogen.fr/services/virgil/home.html	http://www.infobiogen.fr/services/virgil/home. html	NA	0	2017:2:7:11:20:26	500	Can't connect to www.infobiogen.fr:80
9399811	1998	Nucleic Acids Res	9.202	6	Europe	PMC147238	10.1093/nar/26.1.106	26(1):106-7	HuGeMap: a distributed and integrated Human Genome Map database.	http://morissardjerome.free.fr/infobiogen/www.infobiogen.fr/services/Hugemap/index.html	http://babbage.infobiogen.fr:15000/Mappet/Show. html ) th	http://morissardjerome.free.fr/infobiogen/www.infobiogen.fr/services/Hugemap/indeNA.html	1	2017:2:7:11:20:36	200	OK
9399830	1998	Nucleic Acids Res	9.202	43	Europe	PMC147202	10.1093/nar/26.1.183	26(1):183-6	Database on the structure of large ribosomal subunit RNA.	http://rrna.uia.ac.be/	http://rrna.uia.ac.be/ now provi:	NA	0	2017:2:7:11:20:36	500	Can't connect to rrna.uia.ac.be:80
9399837	1998	Nucleic Acids Res	9.202	379	Europe	PMC147235	10.1093/nar/26.1.205	26(1):205-13	IARC Database of p53 gene mutations in human tumors and cell lines: updated compilation, revised formats and new visualisation tools.	http://www.iarc.fr/p53/homepage.htm	http://www.ebi.ac.uk ). The IA:	http://www.iarc.fr/p53/homepage.htm	0	2017:2:7:11:20:36	404	Not Found
9399841	1998	Nucleic Acids Res	9.202	55	Europe	PMC147245	10.1093/nar/26.1.226	26(1):226-8	aCHEdb: the database system for ESTHER, the alpha/beta fold family of proteins and the Cholinesterase gene server.	http://www.ensam.inra.fr/cholinesterase	http://www.ensam.inra.fr/cholinesterase	NA	0	2017:2:7:11:20:36	404	Not Found
9399860	1998	Nucleic Acids Res	9.202	82	Europe	PMC147187	10.1093/nar/26.1.304	26(1):304-8	The PRINTS protein fingerprint database in its fifth year.	http://www.bioinf.man.ac.uk/dbbrowser/	http://www.biochem.:	http://www.bioinf.man.ac.uk/dbbrowser/	1	2017:2:7:11:20:37	200	OK
9399861	1998	Nucleic Acids Res	9.202	50	North Am	PMC147168	10.1093/nar/26.1.309	26(1):309-12	Superior performance in protein homology detection with the Blocks Database servers.	http://www.blocks.fhcrc.org	http://www.blocks.fhcrc.org ) and Ema:	NA	0	2017:2:7:11:20:38	500	Can't connect to www.blocks.fhcrc.org:80
9399865	1998	Nucleic Acids Res	9.202	158	Europe	PMC147246	10.1093/nar/26.1.323	26(1):323-6	The ProDom database of protein domain families.	www.expasy.ch/swissmod/SWISS-MODEL.html	www.expasy.ch/swissmod/SWISS-MODEL.html ) for ho	NA	1	2017:2:7:11:20:38	200	OK
9416612	1997	Protein Sci	3.039	44	Europe	PMC2143626	10.1002/pro.5560061215	6(12):2628-30	OLDERADO: on-line database of ensemble representatives and domains. On Line Database of Ensemble Representatives And DOmains.	http://www.ebi.ac.uk/pdbe/nmr/olderado/nmrcore.html	http://neon.chem.le.ac.uk/olderado/. This (1)	http://www.ebi.ac.uk/pdbe/nmr/olderado/nmrcore.html	1	2017:2:7:11:20:38	200	OK
9460116	1998	Radiographics	2.523	2	North Am	NA	10.1148/radiographics.18.1.9460116	18(1):189-94	SPR online: creating, maintaining, and distributing a virtual professional society on the Internet.	http:@www.pedrad.org	http::@www.pedrad.org) is a rece:	NA	0	2017:2:7:11:20:39	500	No Host option provided
9463946	1997	Analyst	4.033	6	Europe	NA	10.1039/a703049e	122(10):1001-6	Data analysis using the Internet: the World Wide Web scanning probe microscopy data analysis system.	http://pharm6.pharm.nottingham.ac.uk/processing/main	http://pharm6.pharm.nottingham.ac.uk/processing/main. html). Th:	NA	0	2017:2:7:11:20:39	500	Can't connect to pharm6.pharm.nottingham.ac.uk:80
9475985	1997	Comput Appl Biosci	NA	124	North Am	NA	NA	13(6):583-6	Displaying the information contents of structural RNA alignments: the structure logos.	http://rth.dk/resources/slogo/	http://www.cbs.dtu.dk/gorodkin/appl/slogo. html.	http://rth.dk/resources/slogo/	1	2017:2:7:11:20:39	200	OK
9475989	1997	Comput Appl Biosci	NA	45	Europe	NA	NA	13(6):609-15	SAMBA: hardware accelerator for biological sequence comparison.	http://www.irisa.fr/SAMBA/	http://www.irisa.fr/SAMBA/.	NA	1	2017:2:7:11:20:39	200	OK
9475991	1997	Comput Appl Biosci	NA	2	Europe	NA	NA	13(6):619-20	The Sequence Alerting Server--a new WEB server.	http://www.bork.embl-heidelberg.de/alerting/	http://www.bork.embl-heidelberg.de/alerting/.	NA	0	2017:2:7:11:20:39	404	Not Found
9476153	1997	Int J Med Inform	2.363	20	Europe	NA	10.1016/S1386-5056(97)00049-X	46(1):31-9	Using the World Wide Web--a new approach to risk identification of diabetes mellitus.	http://www.uni-leipzig.de/-diabetes	http://www.uni-leipzig.de/-diabetes). The analy	NA	0	2017:2:7:11:20:39	404	Not Found
9476154	1997	Int J Med Inform	2.363	23	Europe	NA	10.1016/S1386-5056(97)00047-6	46(1):41-51	A network of web multimedia medical information servers for a medical school and university hospital.	http://www.medecine.univ-rennes1.fr/	http://www.med.univ-rennesl.fr.	http://www.medecine.univ-rennes1.fr/	1	2017:2:7:11:20:39	200	OK
9504808	1997	Electrophoresis	2.482	26	North Am	NA	10.1002/elps.1150181510	18(15):2759-73	The 2DWG meta-database of two-dimensional electrophoretic gel images on the Internet.	http://www-lecb.ncifcrf.gov/flicker/	http://www-lecb.ncifcrf.gov/flicker/	NA	0	2017:2:7:11:20:40	404	Not Found
9545458	1998	Bioinformatics	5.766	14	North Am	NA	NA	14(2):223-4	GeneFIND web server for protein family identification and information retrieval.	http://diana.uthct.edu	http://diana.uthct.edu CONTACT::	NA	0	2017:2:7:11:20:40	500	Can't connect to diana.uthct.edu:80
9557871	1998	Glycoconj J	NA	396	Europe	NA	10.1023/A:1006960004440	15(2):115-30	NetOglyc: prediction of mucin type O-glycosylation sites based on sequence context and surface accessibility.	http://www.cbs.dtu.dk/services/NetOGlyc/	http://www.cbs.dtu.dk/services/NetOGlyc/ and netOg:	NA	1	2017:2:7:11:20:41	200	OK
9569970	1998	Anal Quant Cytol Histol	NA	13	Europe	NA	NA	20(2):127-32	Microscope remote control with an Internet browser.	http:@amba.rz.charite.hu-berlin.de/telemic	http::@amba.rz.charite.hu-berlin.de/telemic. FUNCTION	NA	0	2017:2:7:11:20:41	500	No Host option provided
9576329	1998	Hemoglobin	0.747	44	North Am	NA	NA	22(2):113-27	Access to a syllabus of human hemoglobin variants (1996) via the World Wide Web.	http://globin.cse.psu.edu	http://globin.cse.psu.edu). Hyperlink:	NA	1	2017:2:7:11:20:41	200	OK
9580490	1997	Mem Inst Oswaldo Cruz	NA	7	Europe	NA	NA	92(6):805-9	TcruziDB, an integrated database, and the WWW information server for the Trypanosoma cruzi genome project.	http://www.dbbm.fiocruz.br	http://www.dbbm.fiocruz.br. It contai:	NA	1	2017:2:7:11:20:42	200	OK
9614268	1998	Bioinformatics	5.766	6	Europe	NA	NA	14(3):252-8	A distributed environment for physical map construction.	http://www.mpimg-berlin-dahlem.mpg.de/~andy/server/	http://www.mpimg-berlin-dahlem.mpg. de/ appro:	NA	0	2017:2:7:11:20:44	500	Can't connect to www.mpimg-berlin-dahlem.mpg.de:80
9632829	1998	Bioinformatics	5.766	6	Europe	NA	NA	14(4):342-8	The new Virgil database: a service of rich links.	http://www.infobiogen.fr/services/virgil/home.html	http://www.infobiogen. fr/servic:	NA	0	2017:2:7:11:20:44	500	Can't connect to www.infobiogen.fr:80
9680721	1998	J Theor Biol	2.049	36	Europe	NA	10.1006/jtbi.1998.0668	192(4):475-87	The subclass approach for mutational spectrum analysis: application of the SEM algorithm.	http://www.itba.mi.cnr.it/webmutation	http://www.itba.mi.cnr.it/webmutation).	NA	0	2017:2:7:11:20:44	503	Service Unavailable
9682053	1998	Bioinformatics	5.766	23	North Am	NA	NA	14(5):401-6	Reduced space hidden Markov model training.	https://compbio.soe.ucsc.edu/sam.html	http://www.cse.ucsc. edu/resea:	NA	1	2017:2:7:11:20:47	200	OK
9682055	1998	Bioinformatics	5.766	191	Europe	NA	NA	14(5):423-9	Removing near-neighbour redundancy from large protein sequence collections.	http://www.embl-ebi.ac.uk/holm/nrdb90	http://www.embl-ebi.ac. uk/holm/n:	NA	0	2017:2:7:11:20:48	500	Can't connect to www.embl-ebi.ac.uk:80
9694991	1998	Bioinformatics	5.766	253	Europe	NA	10.1093/bioinformatics/14.6.523	14(6):523-8	Homology modeling, model and software evaluation: three related resources.	http://swift.embl-heidelberg.de/servers/	http://swift.embl-heidelberg.de/servers/ CONTACT::	NA	0	2017:2:7:11:20:48	500	Can't connect to swift.embl-heidelberg.de:80
9697225	1998	Pac Symp Biocomput	NA	2	North Am	NA	NA	NA	Proclass protein family database: new version with motif alignments.	http://diana.uthct.edu/proclass.html+	NA	NA	0	2017:2:7:11:20:48	500	Can't connect to diana.uthct.edu:80
9699796	1998	Toxicology	3.817	3	North Am	NA	10.1016/S0300-483X(98)00038-9	127(1-3):85-95	US EPA's IRIS pilot program: establishing IRIS as a centralized, peer-reviewed data base with agency consensus. Integrated Risk Information System.	http://www.epa.gov/iris	http://www.epa.gov/iris. Originall:	NA	1	2017:2:7:11:20:48	200	OK
9722650	1998	Nucleic Acids Res	9.202	261	North Am	PMC147832	10.1093/nar/26.18.4280	26(18):4280-90	A database of macromolecular motions.	http://bioinfo.mbb.yale.edu/MolMovDB	http://bioinfo.mbb.yale.edu/MolMovDB , attempt	NA	1	2017:2:7:11:20:49	200	OK
9726502	1998	Int J Med Inform	2.363	9	Europe	NA	10.1016/S1386-5056(98)00059-8	50(1-3):123-32	Developing curriculum in nursing informatics in Europe.	http://www.dn.uoa.gr/nightingale	http://www.dn.uoa.gr/nightingale), which wil:	NA	0	2017:2:7:11:20:49	500	Can't connect to www.dn.uoa.gr:80
9730925	1998	Bioinformatics	5.766	136	Europe	NA	10.1093/bioinformatics/14.7.600	14(7):600-7	Automatic extraction of keywords from scientific text: application to the knowledge domain of protein families.	http://columba.ebi.ac	http://columba.ebi.ac. uk::8765/a:	NA	0	2017:2:7:11:20:49	500	Can't connect to columba.ebi.ac:80
9730927	1998	Bioinformatics	5.766	321	Europe	NA	10.1093/bioinformatics/14.7.617	14(7):617-23	JOY: protein sequence-structure representation and analysis.	http://mizuguchilab.org/joy/	http://www-cryst.bioc.cam.ac.uk/cgi-bin/joy.cgi. CONTACT::	http://mizuguchilab.org/joy/	1	2017:2:7:11:20:49	200	OK
9740056	1998	Electrophoresis	2.482	82	Europe	NA	10.1002/elps.1150191114	19(11):1960-71	'98 Escherichia coli SWISS-2DPAGE database update.	http://www.expasy.ch/ch2d/ch2d-top.html	http://www.expasy.ch/ch2d/ch2d-top.html . Here we:	NA	1	2017:2:7:11:20:50	200	OK
9785318	1998	Med Inform (Lond)	NA	1	North Am	NA	NA	23(3):179-85	A WWW-based information system on resistance of bacteria to antibiotics.	http://www.warn.cas.cz	http://www.warn.cas.cz). Its main	NA	0	2017:2:7:11:20:50	500	Can't connect to www.warn.cas.cz:80
9789092	1998	Bioinformatics	5.766	45	Asia	NA	10.1093/bioinformatics/14.8.665	14(8):665-75	Gene recognition by combination of several gene-finding programs.	http://gf.genome.ad.jp/	http://gf.genome.ad.jp/). CONTACT::	NA	0	2017:2:7:11:20:50	500	Can't connect to gf.genome.ad.jp:80
9789101	1998	Bioinformatics	5.766	NA	NA	NA	NA	14(8):749-50	A web server to locate periodicities in a sequence	http://o2.db.uoa.gr/FT	http://o2.db. uoa.gr/FT:	NA	0	2017:2:7:11:20:50	500	Can't connect to o2.db.uoa.gr:80
9794312	1998	JAMA	NA	37	Europe	NA	10.1001/jama.280.15.1330	280(15):1330-2	FluNet as a tool for global monitoring of influenza on the Web.	http://oms.b3e.jussieu.fr/flunet/	http://oms.b3e.jussieu.fr/flunet/). During 19:	NA	0	2017:2:7:11:20:50	500	Can't connect to oms.b3e.jussieu.fr:80
9799599	1998	Genomics	2.386	11	North Am	NA	10.1006/geno.1998.5524	53(3):325-37	A database of experimental results on globin gene expression.	http://globin.cse.psu.edu	http://globin.cse. psu.edu).:	http://globin.cse.psu.edu	1	2017:2:7:11:20:50	200	OK
9847131	1999	Nucleic Acids Res	9.202	10	Europe	PMC148086	10.1093/nar/27.1.10	27(1):10-1	DBcat: a catalog of biological databases.	http://www.infobiogen.fr/services/dbcat	http://www.infobiogen.fr/services/dbcat) is a comp:	NA	0	2017:2:7:11:20:50	500	Can't connect to www.infobiogen.fr:80
9847132	1999	Nucleic Acids Res	9.202	473	North Am	PMC148087	10.1093/nar/27.1.12	27(1):12-7	GenBank.	http://www.ncbi.nlm.nih.gov	http://www.ncbi.nlm.nih.gov	NA	1	2017:2:7:11:20:50	200	OK
9847137	1999	Nucleic Acids Res	9.202	64	North Am	PMC148092	10.1093/nar/27.1.39	27(1):39-43	The PIR-International Protein Sequence Database.	http://pir.georgetown.edu/	http://www-nbrf.georgetown. edu/pir/):	http://pir.georgetown.edu/	1	2017:2:7:11:20:51	200	OK
9847138	1999	Nucleic Acids Res	9.202	154	Europe	PMC148093	10.1093/nar/27.1.44	27(1):44-8	MIPS: a database for genomes and protein sequences.	http://www.mips.biochem.mpg.de	http://www.mips.biochem.mpg.de) to a spec:	NA	0	2017:2:7:11:20:52	500	Can't connect to www.mips.biochem.mpg.de:80
9847143	1999	Nucleic Acids Res	9.202	1	Europe	PMC148098	10.1093/nar/27.1.63	27(1):63-5	The Enhanced Microbial Genomes Library.	http://pbil.univ-lyon1.fr/emglib/emglib	http://pbil.univ-lyon1.fr/emglib/emglib. html and	NA	0	2017:2:7:11:20:52	404	Not Found
9847155	1999	Nucleic Acids Res	9.202	5	Europe	PMC148110	10.1093/nar/27.1.119	27(1):119-22	The HuGeMap Database: interconnection and visualization of human genome maps.	http://www.infobiogen.fr/services/zomit/ZoomMap.html	http://www.infobiogen.fr/services/zomit/Zoom Map.html):	NA	0	2017:2:7:11:20:52	500	Can't connect to www.infobiogen.fr:80
9847172	1999	Nucleic Acids Res	9.202	64	Europe	PMC148127	10.1093/nar/27.1.174	27(1):174-8	Database on the structure of large subunit ribosomal RNA.	http://rrna.uia.ac.be/	http://rrna.uia.ac.be/	NA	0	2017:2:7:11:20:52	500	Can't connect to rrna.uia.ac.be:80
9847183	1999	Nucleic Acids Res	9.202	12	Europe	PMC148138	10.1093/nar/27.1.213	27(1):213-4	Current status of the Asthma and Allergy Database.	http://cooke.gsf.de	http://cooke.gsf.de	NA	0	2017:2:7:11:20:52	500	Can't connect to cooke.gsf.de:80
9847185	1999	Nucleic Acids Res	9.202	92	Europe	PMC148140	10.1093/nar/27.1.220	27(1):220-5	PRINTS prepares for the new millennium.	http://www.bioinf.man.ac.uk/dbbrowser/	http://www.biochem.ucl.ac.uk/bsm/dbbrowser /. In add:	http://www.bioinf.man.ac.uk/dbbrowser/	1	2017:2:7:11:20:52	200	OK
9847192	1999	Nucleic Acids Res	9.202	34	Europe	PMC148147	10.1093/nar/27.1.248	27(1):248-50	INFOGENE: a database of known gene structures and predicted genes and proteins in sequences of genome sequencing projects.	http://genomic.sanger.ac.uk/db.html	http://genomic.sanger.ac.uk/db.html	NA	0	2017:2:7:11:20:52	410	Gone
9847195	1999	Nucleic Acids Res	9.202	11	Europe	PMC148150	10.1093/nar/27.1.257	27(1):257-9	The SBASE protein domain library, release 6.0: a collection of annotated protein sequence segments.	http://www.icgeb.trieste.it/sbase	http://www.icgeb.trieste.it/sbase. A mirror	NA	0	2017:2:7:11:20:53	404	Not Found
9847197	1999	Nucleic Acids Res	9.202	132	Europe	PMC148152	10.1093/nar/27.1.263	27(1):263-7	Recent improvements of the ProDom database of protein domain families.	http://prodom.prabi.fr/prodom/current/html/form.php	http://www.toulouse.inra.fr/prodom.html). Recent im:	http://prodom.prabi.fr/prodom/current/html/form.php	0	2017:2:7:11:20:53	500	read timeout
9847199	1999	Nucleic Acids Res	9.202	8	North Am	PMC148154	10.1093/nar/27.1.272	27(1):272-4	ProClass Protein Family Database.	http://diana.uthct.edu/proclass.html	http://diana.uthct.edu/proclass.html	NA	0	2017:2:7:11:21:13	500	Can't connect to diana.uthct.edu:80
9847204	1999	Nucleic Acids Res	9.202	12	Europe	PMC148159	10.1093/nar/27.1.289	27(1):289-91	The SWISS-2DPAGE database: what has changed during the last year.	http://www.expasy.ch/ch2d/	http://www.expasy.ch/ch2d/) is an ann:	NA	1	2017:2:7:11:21:13	200	OK
9847212	1999	Nucleic Acids Res	9.202	32	Europe	PMC148167	10.1093/nar/27.1.310	27(1):310-1	The ENZYME data bank in 1999.	http://www.expasy.ch/	http://www.expasy.ch/).	NA	1	2017:2:7:11:21:14	200	OK
9852962	1998	Gene	2.319	45	Europe	NA	10.1016/S0378-1119(97)00650-1	221(1):GC57-63	CINEMA--a novel colour INteractive editor for multiple alignments.	http://aig.cs.man.ac.uk/research/utopia/cinema/cinema.php	http://www.biochem.ucl.ac.uk/bsm/dbbrowser+ ++/CINEMA	http://aig.cs.man.ac.uk/research/utopia/cinema/cinema.php	1	2017:2:7:11:21:14	200	OK
9861505	1998	Comput Biol Med	1.521	34	North Am	NA	10.1016/S0010-4825(98)00027-4	28(5):459-72	Evolution of web site design: implications for medical education on the Internet.	http://medworld.stanford.edu	http://medworld.stanford.edu) was creat	NA	1	2017:2:7:11:21:15	200	OK
9889348	1999	Gene	2.319	14	Europe	NA	10.1016/S0378-1119(98)00509-5	226(1):129-37	Protein-coding regions prediction combining similarity searches and conservative evolutionary properties of protein-coding sequences.	http://www.itb.cnr.it/webgene/	www.itba.mi.cnr.it/webgene).	http://www.itb.cnr.it/webgene/	1	2017:2:7:11:21:15	200	OK
9918947	1998	Bioinformatics	5.766	28	North Am	NA	NA	14(9):772-82	Weighting hidden Markov models for maximum discrimination.	https://compbio.soe.ucsc.edu/sam.html	http://www.cse.ucse. edu/resea:	NA	1	2017:2:7:11:21:17	200	OK
9918958	1998	Bioinformatics	5.766	42	Europe	NA	NA	14(9):827-8	An Internet linkage and mutation database for the complex phenotype asthma.	http://cooke.gsf.de	http://cooke.gsf.de	NA	0	2017:2:7:11:21:18	500	Can't connect to cooke.gsf.de:80
9927713	1998	Bioinformatics	5.766	814	North Am	NA	10.1093/bioinformatics/14.10.846	14(10):846-56	Hidden Markov models for detecting remote protein homologies.	http://www.cse.ucsc.edu/research/compbi	http://www.cse.ucsc.edu/research/compbi o/ CONTAC:	NA	0	2017:2:7:11:21:18	404	Not Found
9927721	1998	Bioinformatics	5.766	848	Europe	NA	10.1093/bioinformatics/14.10.892	14(10):892-3	JPred: a consensus secondary structure prediction server.	http://barton.ebi.ac.uk/servers/jpred.h	http://barton.ebi.ac.uk/servers/jpred.h tml CONTA	NA	0	2017:2:7:11:21:20	500	Can't connect to barton.ebi.ac.uk:80
10065837	1997	Int J Neural Syst	6.085	544	Europe	NA	NA	8(5-6):581-99	A neural network method for identification of prokaryotic and eukaryotic signal peptides and prediction of their cleavage sites.	http://www.cbs.dtu.dk/services/SignalP/	http://www.cbs.dtu.dk/services/SignalP/.	NA	1	2017:2:7:11:21:20	200	OK
10068690	1999	Bioinformatics	5.766	26	Europe	NA	10.1093/bioinformatics/15.1.32	15(1):32-7	RNA movies: visualizing RNA secondary structure spaces.	http://BiBiServ.TechFak.Uni-Bielefeld	http://BiBiServ.TechFak.Uni-Bielefeld. DE/rnamov	NA	0	2017:2:7:11:21:20	500	Can't connect to BiBiServ.TechFak.Uni-Bielefeld:80
10077534	1999	Genome Res	11.351	6	North Am	PMC310717	NA	9(3):277-81	DNA sequence chromatogram browsing using JAVA and CORBA.	http://www.ebi.ac.uk/jparsons	http://www.ebi.ac.uk/jparsons. Links to	NA	0	2017:2:7:11:21:20	404	Not Found
10089198	1999	Bioinformatics	5.766	40	Europe	NA	10.1093/bioinformatics/15.2.131	15(2):131-40	FORESST: fold recognition from secondary structure predictions of proteins.	http://absalpha.dcrt.nih.gov:8008/	http://absalpha.dcrt.nih.gov:8008/ for the l	NA	0	2017:2:7:11:21:23	500	Can't connect to absalpha.dcrt.nih.gov:8008
10089492	1998	Acta Crystallogr D Biol Crystallogr	NA	25	Europe	NA	10.1107/S0907444998007501	54(Pt 6 Pt 1):1155-67	Classifying a protein in the CATH database of domain structures.	http://www.biochem.ucl.ac.uk/bsm/cath	http://www.biochem.ucl.ac.uk/bsm/cath). Although	NA	1	2017:2:7:11:21:23	200	OK
10096918	1999	Biophys J	3.632	22	North Am	PMC1300196	10.1016/S0006-3495(99)77379-0	76(4):2230-7	Toward objective selection of representative microscope images.	http://murphylab.web.cmu.edu/services/TyplC	http://murphylab.web.cmu.edu/services/TyplC).	NA	0	2017:2:7:11:21:23	404	Not Found
10222268	1999	J Struct Biol	2.57	4	Europe	NA	10.1006/jsbi.1999.4102	125(2-3):112-22	A framework for querying a database for structural information on 3D images of macromolecules: A web-based query-by-content prototype on the BioImage macromolecular server.	http://www.bioimage.org/qbc/index.html	http://www.bioimage.org/qbc/index.html.	NA	1	2017:2:7:11:21:24	200	OK
10222408	1999	Bioinformatics	5.766	536	Europe	NA	10.1093/bioinformatics/15.3.211	15(3):211-8	DIALIGN 2: improvement of the segment-to-segment approach to multiple sequence alignment.	http://bibiserv.TechFak.Uni-Bielefeld.DE/dial	http://bibiserv.TechFak.Uni-Bielefeld.DE/dial ign/	NA	1	2017:2:7:11:21:24	200	OK
10222416	1999	Bioinformatics	5.766	11	Europe	NA	10.1093/bioinformatics/15.3.262	15(3):262-3	WWW access to the SYSTERS protein sequence cluster set.	http://www.dkfz-heidelberg.de/tbi/services/cluster/	http://www.dkfz-heidelberg.de/tbi/services/cluster/ systersfo:	NA	0	2017:2:7:11:21:24	500	read timeout
10320403	1999	Bioinformatics	5.766	1	Europe	NA	10.1093/bioinformatics/15.4.341	15(4):341-2	MIAH: automatic alignment of eukaryotic SSU rRNAs.	http://chah.ucc.ie/MIAH	http://chah.ucc.ie/MIAH Contact::	NA	0	2017:2:7:11:21:45	500	Can't connect to chah.ucc.ie:80
10320404	1999	Bioinformatics	5.766	8	Europe	NA	10.1093/bioinformatics/15.4.343	15(4):343-4	The domain-server: direct prediction of protein domain-homologies from BLAST search.	http://www.icgeb.trieste.it/domain	http://www.icgeb.trieste.it/domain. Mirror si:	NA	0	2017:2:7:11:21:45	404	Not Found
10338008	1999	Protein Sci	3.039	1110	Europe	PMC2144330	10.1110/ps.8.5.978	8(5):978-84	ChloroP, a neural network-based method for predicting chloroplast transit peptides and their cleavage sites.	http://www.cbs.dtu.dk/services/ChloroP/	http://www.cbs.dtu.dk/services/ChloroP/.	NA	1	2017:2:7:11:21:45	200	OK
10344245	1999	Electrophoresis	2.482	72	Europe	NA	10.1002/(SICI)1522-2683(19990101)20:4/5<755::AID-ELPS755>3.0.CO;2-6	20(4-5):755-65	New algorithmic approaches to protein spot detection and pattern matching in two-dimensional electrophoresis gel databases.	http://gelmatching.inf.fu-berlin.de	http://gelmatching.inf.fu-berlin.de) is realiz:	NA	1	2017:2:7:11:21:45	200	OK
10344264	1999	Electrophoresis	2.482	44	Europe	NA	10.1002/(SICI)1522-2683(19990101)20:4/5<891::AID-ELPS891>3.0.CO;2-2	20(4-5):891-7	A two-dimensional electrophoresis database of rat heart proteins.	http://gelmatching.inf.fu-berlin.de/pleiss/2d	http://gelmatching.inf.fu-berlin.de/pleiss/2d.	NA	0	2017:2:7:11:21:45	404	Not Found
10360978	1999	Protein Eng	NA	118	Europe	NA	NA	12(5):381-5	A novel method for predicting transmembrane segments in proteins based on a statistical analysis of the SwissProt database: the PRED-TMR algorithm.	http://o2.db.uoa.gr/PRED-T	http://o2.db.uoa. gr/PRED-T:	NA	0	2017:2:7:11:21:45	500	Can't connect to o2.db.uoa.gr:80
10366655	1999	Bioinformatics	5.766	181	Europe	NA	10.1093/bioinformatics/15.5.356	15(5):356-61	Promoter2.0: for the recognition of PolII promoter sequences.	http://www.cbs.dtu.dk/services/promoter/	http://www.cbs.dtu. dk/servic:	NA	1	2017:2:7:11:21:45	200	OK
10366660	1999	Bioinformatics	5.766	159	North Am	NA	10.1093/bioinformatics/15.5.391	15(5):391-412	Automated genome sequence analysis and annotation.	http://www.sander.ebi.ac.uk/gqsrv/submit	http://www.sander.ebi.ac. uk/gqsrv/:	NA	0	2017:2:7:11:21:45	500	Can't connect to www.sander.ebi.ac.uk:80
10366661	1999	Bioinformatics	5.766	142	Europe	NA	10.1093/bioinformatics/15.5.413	15(5):413-21	Improved performance in protein secondary structure prediction by inhomogeneous score combination.	https://npsa-prabi.ibcp.fr/	http://pbil.ibcp.fr/NPSA/npsa_server.ht ml. The s:	https://npsa-prabi.ibcp.fr/	0	2017:2:7:11:21:45	500	Can't connect to npsa-prabi.ibcp.fr:443
10366664	1999	Bioinformatics	5.766	221	Europe	NA	10.1093/bioinformatics/15.5.426	15(5):426-7	REPuter: fast computation of maximal repeats in complete genomes.	http://bibiserv.techfak.uni-bielefeld.de/rep	http://bibiserv.techfak.uni-bielefeld.de/rep uter/).	NA	1	2017:2:7:11:22:5	200	OK
10383475	1999	Bioinformatics	5.766	128	Europe	NA	10.1093/bioinformatics/15.6.510	15(6):510-20	An ontology for bioinformatics applications.	http://img.cs.man.ac.uk/tambis	http://img.cs.man.ac.uk/tambis (although:	NA	0	2017:2:7:11:22:6	500	Can't connect to img.cs.man.ac.uk:80
10383477	1999	Bioinformatics	5.766	13	Europe	NA	10.1093/bioinformatics/15.6.523	15(6):523-4	BLAST PRINTS--alternative perspectives on sequence similarity.	http://www.biochem.ucl.ac.uk/cgi-bin/wright/printsBLAST.cgi	http://www.biochem.ucl. ac.uk/cgi:	http://www.biochem.ucl.ac.uk/cgi-bin/wright/printsBLAST.cgi	0	2017:2:7:11:22:6	404	Not Found
10384476	1998	Stud Health Technol Inform	NA	15	Europe	NA	NA	52 Pt 1:351-5	IMGT, the international ImMunoGeneTics database: a new design for immunogenetics data access.	http://www.ebi.ac.uk/imgt	http://www.ebi.ac.uk/imgt (contact:::	NA	0	2017:2:7:11:22:6	404	Not Found
10421496	1999	Chem Biol Interact	NA	3	Europe	NA	10.1016/S0009-2797(99)00071-X	119-120:567-76	Kinetic parameters of cholinesterase interactions with organophosphates: retrieval and comparison tools available through ESTHER database: ESTerases, alpha/beta Hydrolase Enzymes and Relatives.	http://www.ensam.inra.fr/cholinesterase	http://www.ensam.inra.fr/cholinesterase). The full	NA	0	2017:2:7:11:22:8	404	Not Found
10469822	1999	Protein Eng	NA	52	Europe	NA	NA	12(8):631-4	An hierarchical artificial neural network system for the classification of transmembrane proteins.	http://o2.db.uoa.gr/PRED-TMR2	http://o2.db.uoa.gr/PRED-TMR2	NA	0	2017:2:7:11:22:8	500	Can't connect to o2.db.uoa.gr:80
10493132	1999	Electrophoresis	2.482	112	Europe	NA	10.1002/(SICI)1522-2683(19990801)20:11<2280::AID-ELPS2280>3.0.CO;2-Q	20(11):2280-98	Two-dimensional gel protein database of Saccharomyces cerevisiae (update 1999).	www.ibgc.u-bordeaux2.fr/YPM	www.ibgc.u-bordeaux2.fr/YPM).	NA	1	2017:2:7:11:22:8	200	OK
10521537	1999	Glycobiology	3.283	63	Europe	NA	10.1093/glycob/9.10.1009	9(10):1009-22	Scanning the available Dictyostelium discoideum proteome for O-linked GlcNAc glycosylation sites using neural networks.	http://www.cbs.dtu.dk/services/DictyOGlyc/	http://www.cbs.dtu.dk/services/DictyOGlyc/ and via E:	NA	1	2017:2:7:11:22:8	200	OK
10588897	1999	J Mol Biol	4.517	69	Asia	NA	10.1006/jmbi.1999.3257	294(4):921-35	kPROT: a knowledge-based scale for the propensity of residue orientation in transmembrane segments. Application to membrane protein structure prediction.	http://bioinfo.weizmann.ac.il/kPROT	http://bioinfo.weizmann.ac.il/kPROT) is availa	NA	0	2017:2:7:11:22:8	404	Not Found
10592168	2000	Nucleic Acids Res	9.202	35	Europe	PMC102454	NA	28(1):8-9	DBcat: a catalog of 500 biological databases.	http://www.infobiogen.fr/services/dbcat	http://www.infobiogen.fr/services/dbcat ) is a co:	NA	0	2017:2:7:11:22:8	500	Can't connect to www.infobiogen.fr:80
10592176	2000	Nucleic Acids Res	9.202	221	Europe	PMC102494	NA	28(1):37-40	MIPS: a database for genomes and protein sequences.	http://www.mips.biochem.mpg.de	http://www.mips.bioc:	http://www.mips.biochem.mpg.de	0	2017:2:7:11:22:9	500	Can't connect to www.mips.biochem.mpg.de:80
10592179	2000	Nucleic Acids Res	9.202	120	Asia	PMC102438	NA	28(1):49-55	ProtoMap: automatic classification of protein sequences and hierarchy of protein families.	http://www.protomap.cs.huji.ac.il	http://www.protomap.cs.huji.ac.il	NA	0	2017:2:7:11:22:9	500	Can't connect to www.protomap.cs.huji.ac.il:80
10592183	2000	Nucleic Acids Res	9.202	8	Europe	PMC102414	NA	28(1):68-71	EMGLib: the enhanced microbial genomes library (update 2000).	http://pbil.univ-lyon1.fr/emglib.html	http://pbil.univ-lyon1.fr/emglib.html and the M:	NA	0	2017:2:7:11:22:9	404	Not Found
10592216	2000	Nucleic Acids Res	9.202	450	North Am	PMC102428	NA	28(1):173-4	The RDP (Ribosomal Database Project) continues.	http://rdp.cme.msu.edu/	http://rdp.cme.msu.edu/ ). Analys:	NA	1	2017:2:7:11:22:9	200	OK
10592218	2000	Nucleic Acids Res	9.202	54	Europe	PMC102430	NA	28(1):177-8	The European large subunit ribosomal RNA database.	http://rrna.uia.ac.be/lsu/	http://rrna.uia.ac.be/lsu/. It is a c:	NA	0	2017:2:7:11:22:10	500	Can't connect to rrna.uia.ac.be:80
10592230	2000	Nucleic Acids Res	9.202	107	Europe	PMC102442	NA	28(1):219-21	IMGT, the international ImMunoGeneTics database.	http://imgt.cines.fr:8104/textes/IMGTindex.html	http://imgt.cines.fr::8104/textes/IMGTindex.html).	NA	0	2017:2:7:11:22:10	500	Can't connect to imgt.cines.fr:8104
10592243	2000	Nucleic Acids Res	9.202	278	Europe	PMC102458	NA	28(1):267-9	ProDom and ProDom-CG: tools for protein domain analysis and whole genome comparisons.	http://prodom.prabi.fr/prodom/current/html/home.php	http://www.toulouse. inra.fr/p:	http://prodom.prabi.fr/prodom/current/html/home.php	0	2017:2:7:11:22:11	500	read timeout
10592245	2000	Nucleic Acids Res	9.202	12	North Am	PMC102450	NA	28(1):273-6	ProClass protein family database.	http://pir.georgetown.edu/	http://pir.georgetown.edu/gfserver/proclass.html	http://pir.georgetown.edu/	1	2017:2:7:11:22:31	200	OK
10592246	2000	Nucleic Acids Res	9.202	165	Europe	PMC102424	NA	28(1):277-82	Assigning genomic sequences to CATH.	http://www.biochem.ucl.ac.uk/bsm/cath	http://www.biochem.ucl. ac.uk/bsm:	http://www.biochem.ucl.ac.uk/bsm/cath	1	2017:2:7:11:22:31	200	OK
10592248	2000	Nucleic Acids Res	9.202	87	Europe	PMC102456	NA	28(1):286-8	The 1999 SWISS-2DPAGE database update.	http://www.expasy.ch/ch2d/	http://www.expasy.ch/ch2d/ ) is an a:	NA	1	2017:2:7:11:22:31	200	OK
10592255	2000	Nucleic Acids Res	9.202	515	Europe	PMC102465	NA	28(1):304-5	The ENZYME database in 2000.	http://www.expasy.ch/enzyme/	http://www.expasy.ch/enzyme/ ).	NA	1	2017:2:7:11:22:32	200	OK
10600390	1999	J Mol Biol	4.517	1839	Europe	NA	10.1006/jmbi.1999.3310	294(5):1351-62	Sequence and structure-based prediction of eukaryotic protein phosphorylation sites.	http://www.cbs.dtu.dk/services/NetPhos/or	http://www.cbs.dtu.dk/services/NetPhos/or via e-mai:	NA	0	2017:2:7:11:22:32	404	Not Found
10707029	2000	Proteins	2.499	77	North Am	NA	10.1002/(SICI)1097-0134(20000301)38:4<428::AID-PROT8>3.0.CO;2-N	38(4):428-40	Protein structure alignment using a genetic algorithm.	http://engpub1.bu.edu/-josephs	http://engpub1.bu.edu/-josephs.	NA	0	2017:2:7:11:22:32	500	read timeout
10710711	1999	Genetica	1.343	5	Europe	NA	NA	106(1-2):63-73	Sequence-dependent modelling of local DNA bending phenomena: curvature prediction and vibrational analysis.	http://pongor.itk.ppke.hu/?q=bioinfoservices	http::@www.icgeb.trieste.it/dna).	http://pongor.itk.ppke.hu/?q=bioinfoservices	1	2017:2:7:11:22:52	200	OK
10720578	2000	Genome Res	11.351	66	Europe	PMC311423	10.1101/gr.10.3.379	10(3):379-85	HOBACGEN: database system for comparative genomics in bacteria.	http://doua.prabi.fr/databases/hogenom/home.php?contents=query	http://pbil.univ-lyon1. fr/databa:	http://doua.prabi.fr/databases/hogenom/home.php?contents=query	1	2017:2:7:11:22:52	200	OK
10734184	2000	Nucleic Acids Res	9.202	178	North Am	PMC102811	NA	28(8):1665-75	The morph server: a standardized system for analyzing and visualizing macromolecular motions in a database framework.	http://bioinfo.mbb.yale	http://bioinfo.mbb.yale. edu/MolMo	NA	0	2017:2:7:11:22:53	500	Can't connect to bioinfo.mbb.yale:80
10767712	2000	J Pathol	7.381	43	Europe	NA	10.1002/(SICI)1096-9896(200005)191:1<8::AID-PATH558>3.0.CO;2-9	191(1):8-14	Telepathology by the Internet.	http://amba.charite.de/telemic/	http://amba.charite.de/telemic/). The syste	NA	0	2017:2:7:11:22:53	500	Can't connect to amba.charite.de:80
10779500	2000	Genome Res	11.351	895	North Am	PMC310868	10.1101/gr.10.4.577	10(4):577-86	PipMaker--a web server for aligning two genomic DNA sequences.	http://pipmaker.bx.psu.edu/pipmaker/	http://bio.cse.psu.edu) is a Worl	http://pipmaker.bNA.psu.edu/pipmaker/	1	2017:2:7:11:22:53	200	OK
10786291	1999	Proc Int Conf Intell Syst Mol Biol	NA	12	Europe	NA	NA	NA	Using sequence motifs for enhanced neural network prediction of protein distance constraints.	http://www.cbs.dtu.dk/services/distanceP/	NA	NA	1	2017:2:7:11:22:53	200	OK
10842733	2000	Bioinformatics	5.766	48	Europe	NA	NA	16(2):125-9	SAWTED: structure assignment with text description--enhanced detection of remote homologues with automated SWISS-PROT annotation comparisons.	http://www.bmm.icnet.uk/servers/sawted	http://www.bmm.icnet.uk/servers/sawted). CONTACT::	NA	0	2017:2:7:11:22:55	500	Can't connect to www.bmm.icnet.uk:80
10860755	2000	J Mol Biol	4.517	1292	Europe	NA	10.1006/jmbi.2000.3741	299(2):499-520	Enhanced genome annotation using structural profiles in the program 3D-PSSM.	http://www.bmm.icnet.uk/servers/3dpssm	http://www.bmm.icnet.uk/servers/3dpssm	NA	0	2017:2:7:11:22:55	500	Can't connect to www.bmm.icnet.uk:80
10861942	2000	Proteins	2.499	532	Europe	NA	10.1002/1097-0134(20000815)40:3<502::AID-PROT170>3.0.CO;2-Q	40(3):502-11	Application of multiple sequence alignment profiles to improve protein secondary structure prediction.	http://barton.ebi.ac.uk/	http://barton.ebi.ac.uk/. Proteins	NA	0	2017:2:7:11:22:55	500	Can't connect to barton.ebi.ac.uk:80
10869017	2000	Bioinformatics	5.766	27	Europe	NA	NA	16(3):245-50	Adaptive encoding neural networks for the recognition of human signal peptide cleavage sites.	http://itb.biologie.hu-berlin.de/	http://itb.biologie.hu-berlin.de/ approxima:	NA	1	2017:2:7:11:22:55	200	OK
10869018	2000	Bioinformatics	5.766	68	Europe	NA	NA	16(3):251-6	Predicting the oxidation state of cysteines by multiple sequence alignment.	http://guitar.rockefeller.edu/approximately	http://guitar.rockefeller.edu/approximately andras/cy:	NA	0	2017:2:7:11:22:56	500	Can't connect to guitar.rockefeller.edu:80
10869021	2000	Bioinformatics	5.766	23	Europe	NA	NA	16(3):286-7	MPSA: integrated system for multiple protein sequence analysis with client/server capabilities.	https://npsa-prabi.ibcp.fr/	http://pbil.ibcp.fr/NPSA) in order	https://npsa-prabi.ibcp.fr/	0	2017:2:7:11:22:56	500	Can't connect to npsa-prabi.ibcp.fr:443
10869028	2000	Bioinformatics	5.766	3	Asia	NA	NA	16(4):301-12	GABAagent: a system for integrating data on GABA receptors.	http://www.ust.hk/gaba	http://www.ust.hk/gaba.	NA	0	2017:2:7:11:23:16	404	Not Found
10869041	2000	Bioinformatics	5.766	1888	Europe	NA	NA	16(4):404-5	The PSIPRED protein structure prediction server.	http://globin.bio.warwick.ac.uk/psipred/	http://globin.bio.warwick.ac.uk/psipred/	NA	0	2017:2:7:11:23:19	500	read timeout
10891285	2000	J Mol Biol	4.517	2621	Europe	NA	10.1006/jmbi.2000.3903	300(4):1005-16	Predicting subcellular localization of proteins based on their N-terminal amino acid sequence.	http://www.cbs.dtu.dk/services/TargetP/	http://www.cbs.dtu.dk/services/TargetP/.	NA	1	2017:2:7:11:23:39	200	OK
10939474	2000	Electrophoresis	2.482	36	Europe	NA	10.1002/1522-2683(20000701)21:12<2566::AID-ELPS2566>3.0.CO;2-F	21(12):2566-75	Protein analysis by mass spectrometry and sequence database searching: a proteomic approach to identify human lymphoblastoid cell line proteins.	www-smbh.univ-paris13.fr/lbtp/index.htm	www-smbh.univ-paris13.fr/lbtp/index.htm.	NA	0	2017:2:7:11:23:39	400	URL must be absolute
10980148	2000	Bioinformatics	5.766	35	Europe	NA	NA	16(6):513-9	Browsing the SLoop database of structurally classified loops connecting elements of protein secondary structure.	http://www-cryst.bioc.cam.ac.uk/	http://www-cryst.bioc.cam.ac.uk/ approxima:	NA	1	2017:2:7:11:23:39	200	OK
11057034	2000	Folia Neuropathol	1.233	NA	NA	NA	NA	38(1):43-6	Real-time teleneuropathology for a second opinion of neurooncological cases.	http:Âżampat.amu.edu.pl	NA	NA	0	2017:2:7:11:23:40	500	No Host option provided
11079567	2000	Electrophoresis	2.482	32	Europe	NA	10.1002/1522-2683(20001001)21:16<3483::AID-ELPS3483>3.0.CO;2-X	21(16):3483-7	The establishment of a human liver nuclei two-dimensional electrophoresis reference map.	http://www.expasy.ch/ch2d/	http://www.expasy.ch/ch2d/).	NA	1	2017:2:7:11:23:40	200	OK
11120679	2000	Bioinformatics	5.766	34	Europe	NA	NA	16(10):899-905	United StatesGE: a web-based approach towards the analysis of SAGE data. Serial Analysis of Gene Expression.	http://www.cmbi.kun.nl/United Statesge/	http://www.cmbi.kun.nl/United Statesge/. The sourc:	NA	0	2017:2:7:11:23:40	500	Can't connect to www.cmbi.kun.nl:80
11120681	2000	Bioinformatics	5.766	98	Europe	NA	NA	16(10):915-22	CAST: an iterative algorithm for the complexity analysis of sequence tracts. Complexity analysis of sequence tracts.	http://www.ebi.ac.uk/research/cgg/services/cast/	http://www.ebi.ac.uk/research/cgg/services/cast/	NA	0	2017:2:7:11:23:40	404	Not Found
11120687	2000	Bioinformatics	5.766	25	Europe	NA	NA	16(10):948-9	A space-efficient algorithm for aligning large genomic sequences.	http://bibiserv.techfak	http://bibiserv.techfak. uni-biele	NA	0	2017:2:7:11:23:42	500	Can't connect to bibiserv.techfak:80
11125046	2001	Nucleic Acids Res	9.202	7	North Am	PMC29768	NA	29(1):49-51	The MetaFam Server: a comprehensive protein family resource.	http://metafam.ahc.umn.edu/	http://metafam.ahc.umn.edu/.	NA	0	2017:2:7:11:23:42	500	Can't connect to metafam.ahc.umn.edu:80
11125062	2001	Nucleic Acids Res	9.202	50	Europe	PMC29807	NA	29(1):106-10	The ARKdb: genome databases for farmed and other animals.	http://www.thearkdb.org	http://www.thearkdb.org) providing:	NA	1	2017:2:7:11:23:42	200	OK
11125082	2001	Nucleic Acids Res	9.202	1083	North Am	PMC29785	NA	29(1):173-4	The RDP-II (Ribosomal Database Project).	http://wdcm.nig.ac.jp/RDP/html/index.html	http://wdcm.nig.ac.jp/RDP/html/index.h tml). RDP:	NA	0	2017:2:7:11:23:43	500	read timeout
11125083	2001	Nucleic Acids Res	9.202	142	Europe	PMC29789	NA	29(1):175-7	The European Large Subunit Ribosomal RNA Database.	http://rrna.uia.ac.be/lsu/	http://rrna.uia.ac.be/lsu/.	NA	0	2017:2:7:11:24:3	500	Can't connect to rrna.uia.ac.be:80
11125096	2001	Nucleic Acids Res	9.202	57	Asia	PMC29793	NA	29(1):219-20	PDB-REPRDB: a database of representative protein chains from the Protein Data Bank (PDB).	http://www.rwcp.or.jp/papia/	http://www.rwcp.or.jp/papia/).	NA	0	2017:2:7:11:24:3	500	Can't connect to www.rwcp.or.jp:80
11125105	2001	Nucleic Acids Res	9.202	137	North Am	PMC29840	NA	29(1):255-9	SpliceDB: database of canonical and non-canonical mammalian splice sites.	https://genomic.sanger.ac.uk/spldb/SpliceDB.html	http://genomic.sanger.ac. uk/spldb/:	https://genomic.sanger.ac.uk/spldb/SpliceDB.html	0	2017:2:7:11:24:3	410	Gone
11159318	2000	Bioinformatics	5.766	578	North Am	NA	NA	16(11):1046-7	VISTA : visualizing global DNA sequence alignments of arbitrary length.	http://www-gsd.lbl.gov/vista	http://www-gsd.lbl.gov/vista. The sourc:	NA	1	2017:2:7:11:24:3	200	OK
11238068	2001	Bioinformatics	5.766	393	Europe	NA	NA	17(2):126-36	A hierarchical unsupervised growing neural network for clustering gene expression patterns.	http://bioinfo.cnio.es/sotarray	http://bioinfo.cnio.es/sotarray.	NA	1	2017:2:7:11:24:5	200	OK
11238082	2001	Bioinformatics	5.766	12	Europe	NA	NA	17(2):202-4	RCNPRED: prediction of the residue co-ordination numbers in proteins.	http://prion.biocomp.unibo.it/rcnpred.html	http://prion.biocomp.unibo.it/rcnpred.html.	NA	0	2017:2:7:11:24:5	500	Can't connect to prion.biocomp.unibo.it:80
11238992	2001	Nucleic Acids Res	9.202	27	Europe	PMC29756	NA	29(6):1272-7	Gene2EST: a BLAST2 server for searching expressed sequence tag (EST) databases with eukaryotic gene-sized queries.	http://woody.embl-heidelberg.de/gene2est/	http://woody.embl-heidelberg.de/gene2est/), a server	NA	0	2017:2:7:11:24:6	500	Can't connect to woody.embl-heidelberg.de:80
11266621	2001	Protein Sci	3.039	101	Europe	PMC2373940	10.1110/ps.40501	10(2):352-61	LiveBench-1: continuous benchmarking of protein structure prediction servers.	http://BioInfo.PL/LiveBench	http://BioInfo.PL/LiveBench) is being	NA	0	2017:2:7:11:24:6	404	Not Found
11269231	2000	Bioinformatics	5.766	10	Europe	NA	NA	16(11):1044-5	Model.it: building three dimensional DNA models from sequence data.	http://pongor.itk.ppke.hu/dna/model_it.html#/modelit_intro	http://www.icgeb.trieste.it/dna/ CONTACT::	http://pongor.itk.ppke.hu/dna/model_it.html#/modelit_intro	1	2017:2:7:11:24:7	200	OK
11328486	2001	J Pept Res	NA	NA	NA	NA	NA	57(4):292-300	Analysis of gammabeta, betagamma, gammagamma, betabeta continuous turns in proteins.	http://www.cdfd.org.in/dsmp.html	http://www.cdfd.org.in/dsmp.html). This is u:	NA	0	2017:2:7:11:24:7	503	Service Unavailable
11334635	2001	Comput Biol Med	1.521	96	Europe	NA	10.1016/S0010-4825(01)00008-7	31(4):259-67	ANTHEPROT: an integrated protein sequence analysis software with client/server capabilities.	http://antheprot-pbil.ibcp.fr/	http://pbil.ibcp.fr/ANTHEPROT.	http://antheprot-pbil.ibcp.fr/	0	2017:2:7:11:24:7	500	read timeout
11344328	2001	Protein Sci	3.039	83	Europe	PMC2374131	10.1110/ps.37601	10(3):599-612	CODA: a combined algorithm for predicting the structurally variable regions of protein models.	http://www-cryst.bioc.cam.ac.uk/~charlotte/Coda/search_coda.html	http://www-cryst.bioc.cam.ac.uk/~charlotte/Coda/search_coda.html.	NA	0	2017:2:7:11:24:27	404	Not Found
11353083	2001	Nucleic Acids Res	9.202	107	North Am	PMC55461	NA	29(10):2135-44	Discovering common stem-loop motifs in unaligned RNA sequences.	http://www.bioinf.au.dk/slash/	http://www.bioinf.au.dk/slash/.	NA	0	2017:2:7:11:24:28	500	Can't connect to www.bioinf.au.dk:80
11442068	2001	J Digit Imaging	1.406	NA	North Am	PMC3452713	NA	14(2 Suppl 1):117-20	WWW.MDTF.ORG: a World Wide Web forum for developing open-architecture, freely distributed, digital teaching file software by participant consensus.	www.mdtf.org	www.mdtf.org will prov	NA	1	2017:2:7:11:24:28	200	OK
11448882	2001	Bioinformatics	5.766	13	Europe	NA	NA	17(7):642-5	Semi-automated update and cleanup of structural RNA alignment databases.	http://www.bioinf.au.dk/rnadbtool/	http://www.bioinf.au.dk/rnadbtool/	NA	0	2017:2:7:11:24:28	500	Can't connect to www.bioinf.au.dk:80
11448885	2001	Bioinformatics	5.766	8	Europe	NA	NA	17(7):656-7	MEDUnited States: large scale automatic selection and visual assessment of PCR primer pairs.	http://www.cgr.ki.se/cgr/groups/sonnhammer/Blixem.html	http://www.cgr.ki.se/cgr/groups/sonnhammer/Blixem.html) viewer.AV:	NA	0	2017:2:7:11:24:28	500	Can't connect to www.cgr.ki.se:80
11457506	2001	Brain Res Mol Brain Res	NA	10	North Am	NA	10.1016/S0169-328X(01)00146-2	91(1-2):169-73	Radiation hybrid mapping of 11 alpha and beta nicotinic acetylcholine receptor genes in Rattus norvegicus.	www.rgd.mcw.edu/RHMAP	www.rgd.mcw.edu/RHMAP SERVER/),	NA	0	2017:2:7:11:24:28	404	Not Found
11468417	2001	Acta Crystallogr D Biol Crystallogr	NA	117	Europe	NA	10.1107/S0907444901007697	57(Pt 8):1201-3	Molray--a web interface between O and the POV-Ray ray tracer.	http://xray.bmc.uu.se/molray	http://xray.bmc.uu.se/molray.	NA	1	2017:2:7:11:24:29	200	OK
11473014	2001	Bioinformatics	5.766	39	Europe	NA	NA	17 Suppl 1:S234-42	Improved prediction of the number of residue contacts in proteins by recurrent neural networks.	http://promoter.ics.uci.edu/BRNN-PRED/	http://promoter.ics.uci.edu/BRNN-PRED/.	NA	0	2017:2:7:11:24:29	500	Can't connect to promoter.ics.uci.edu:80
11522919	2001	Protein Eng	NA	6	Europe	NA	NA	14(7):465-72	A Web-based classification system of DNA-binding protein families.	http://kronos.biol.uoa.gr/~mariak/dbDNA.html	http://kronos.biol.uoa.gr/~mariak/dbDNA.html).	NA	0	2017:2:7:11:24:29	500	read timeout
11524373	2001	Bioinformatics	5.766	635	Asia	NA	NA	17(8):721-8	Support vector machine approach for protein subcellular localization prediction.	http://www.bioinfo.tsinghua.edu.cn/SubLoc/	http://www.bioinfo.tsinghua.edu.cn/SubLoc/. SUPPLEMEN:	NA	0	2017:2:7:11:24:49	500	Can't connect to www.bioinfo.tsinghua.edu.cn:80
11524374	2001	Bioinformatics	5.766	25	Europe	NA	NA	17(8):729-37	The Bioinformatics Template Library--generic components for biocomputing.	http://www.embl-ebi.ac.uk/FTP/index.html	http://www.embl-ebi.ac.uk/FTP/index.html	NA	0	2017:2:7:11:24:50	500	Can't connect to www.embl-ebi.ac.uk:80
11524380	2001	Bioinformatics	5.766	47	Europe	NA	NA	17(8):748-9	HOMSTRAD: adding sequence information to structure-based alignments of homologous protein families.	http://mizuguchilab.org/homstrad/	http://www-cryst.bioc.cam.ac.uk/homstrad/. Query seq:	http://mizuguchilab.org/homstrad/	1	2017:2:7:11:24:50	200	OK
11524381	2001	Bioinformatics	5.766	194	Europe	NA	NA	17(8):750-1	Structure prediction meta server.	http://BioInfo.PL/services.html	http://BioInfo.PL/services.html.	NA	1	2017:2:7:11:24:51	200	OK
11524382	2001	Bioinformatics	5.766	79	Europe	NA	NA	17(8):752-3	Easier threading through web-based comparisons and cross-validations.	http://www.infobiosud.cnrs.fr/bioserver/hah1.html	http://www.infobiosud.cnrs.fr/bioserver/hah1.html	NA	0	2017:2:7:11:24:51	500	Can't connect to www.infobiosud.cnrs.fr:80
11544202	2001	Genome Res	11.351	65	Europe	PMC311140	10.1101/gr.177401	11(9):1574-83	SGP-1: prediction and validation of homologous genes based on sequence alignments.	http://soft.ice.mpg.de/sgp-1	http://soft.ice.mpg.de/sgp-1. The sourc:	NA	0	2017:2:7:11:24:52	500	read timeout
11569856	2001	Fresenius J Anal Chem	NA	NA	NA	NA	NA	370(7):803-10	web-based interactive data processing: application to stable isotope metrology.	http://www. nist.gov/widps-co2	http://www.nist.gov/	http://www. nist.gov/widps-co2	0	2017:2:7:11:25:12	500	Can't connect to www. nist.gov:80
11590102	2001	Bioinformatics	5.766	17	North Am	NA	NA	17(9):843-4	GeneMachine: gene prediction and sequence annotation.	https://genemachine.nhgri.nih.gov/index.shtml	http://genome.nhgri.nih.gov/genemachine/supplement/.	https://genemachine.nhgri.nih.gov/indeNA.shtml	1	2017:2:7:11:25:12	200	OK
11590104	2001	Bioinformatics	5.766	1441	Europe	NA	NA	17(9):847-8	InterProScan--an integration platform for the signature-recognition methods in InterPro.	http://www.ebi.ac.uk/interpro/scan.html	http://www.ebi.ac.uk/interpro/scan.html) as well a:	NA	1	2017:2:7:11:25:13	200	OK
11590105	2001	Bioinformatics	5.766	1149	Europe	NA	NA	17(9):849-50	The HMMTOP transmembrane topology prediction server.	http://www.enzim.hu/hmmtop	http://www.enzim.hu/hmmtop. Source co:	NA	1	2017:2:7:11:25:13	200	OK
11599028	2001	Proteins	2.499	97	North Am	NA	10.1002/prot.1145	45(3):241-61	Linear programming optimization and a double statistical filter for protein threading protocols.	http://www.tc.cornell.edu/CBIO/loopp	http://www.tc.cornell.edu/CBIO/loopp.	NA	0	2017:2:7:11:25:13	500	Can't connect to www.tc.cornell.edu:80
11604541	2001	Protein Sci	3.039	224	Europe	PMC2374055	10.1110/ps.08501	10(11):2354-62	Pcons: a neural-network-based consensus predictor that improves fold recognition.	http://bioinfo.pl/meta/	http://bioinfo.pl/meta/.	NA	0	2017:2:7:11:25:13	401	Unauthorized
11667947	2001	BMC Bioinformatics	2.435	153	North Am	PMC58584	NA	02:07:00	The distributed annotation system.	http://www.biodas.org/	http://www.biodas.org/.	NA	1	2017:2:7:11:25:13	200	OK
11680894	2001	Proteomics	4.079	122	Europe	NA	10.1002/1615-9861(200101)1:1<136::AID-PROT136>3.0.CO;2-1	1(1):136-63	The mouse SWISS-2D PAGE database: a tool for proteomics study of diabetes and obesity.	http://www.expasy.ch/ch2d/2d-	http://www.expasy.ch/ch2d/2d- index.htm:	NA	1	2017:2:7:11:25:15	200	OK
11697912	2001	J Mol Biol	4.517	702	Europe	NA	10.1006/jmbi.2001.5080	313(4):903-19	Assignment of homology to genome sequences using a library of hidden Markov models that represent all proteins of known structure.	http://supfam.org/SUPERFAMILY/	http://stash.mrc-lmb.cam.ac.uk/SUPERFAMILY. This serv:	http://supfam.org/SUPERFAMILY/	1	2017:2:7:11:25:16	200	OK
11714913	2001	Protein Sci	3.039	11	North Am	PMC2374048	10.1110/ps.1440110.1110/ps.ps.14401	10(12):2460-9	Motif-based fold assignment.	http://www.doe-mbi.ucla.edu/mba	http://www.doe-mbi.ucla.edu/mba.	NA	0	2017:2:7:11:25:16	404	Not Found
11724739	2001	Bioinformatics	5.766	71	Europe	NA	NA	17(11):1077-83	Database-driven multi locus sequence typing (MLST) of bacterial pathogens.	http://www.mlst.net	http://www.mlst.net.	NA	1	2017:2:7:11:25:17	200	OK
11743721	2001	J Mol Biol	4.517	738	Europe	NA	10.1006/jmbi.2000.5197	314(5):1041-52	Automatic clustering of orthologs and in-paralogs from pairwise species comparisons.	http://www.cgb.ki.se/inparanoid/	http://www.cgb.ki.se/inparanoid/. This is t:	NA	0	2017:2:7:11:25:17	500	Can't connect to www.cgb.ki.se:80
11751232	2001	Bioinformatics	5.766	84	Europe	NA	NA	17(12):1226-7	MELTING, computing the melting temperature of nucleic acid duplex.	http://www.pasteur.fr/recherche/unites/neubiomol/meltinghome.html	http://www.pasteur.fr/recherche/unites/neubiomol/meltinghome.html) and is ac:	NA	0	2017:2:7:11:25:17	404	Not Found
11751237	2001	Bioinformatics	5.766	429	Asia	NA	10.1093/bioinformatics/17.12.1236	17(12):1236-7	ProPred: prediction of HLA-DR binding sites.	http://www.imtech.res.in/raghava/propred/page3.html	http://www.imtech.res.in/raghava/propred/page3.html	NA	1	2017:2:7:11:25:21	200	OK
11751239	2001	Bioinformatics	5.766	3	Europe	NA	NA	17(12):1240-1	ToolShop: prerelease inspections for protein structure prediction servers.	http://BioInfo.PL/LiveBench/	http://BioInfo.PL/LiveBench/).	NA	0	2017:2:7:11:25:23	404	Not Found
11751240	2001	Bioinformatics	5.766	147	North Am	NA	NA	17(12):1242-3	EVA: continuous automatic evaluation of protein structure prediction servers.	http://cubic.bioc.columbia.edu/eva	http://cubic.bioc.columbia.edu/eva. CONTACT::	NA	0	2017:2:7:11:25:23	500	Can't connect to cubic.bioc.columbia.edu:80
11752246	2002	Nucleic Acids Res	9.202	674	Europe	PMC99165	NA	30(1):31-4	MIPS: a database for genomes and protein sequences.	http://mips.gsf.de	http://mips.gsf.de).	NA	1	2017:2:7:11:25:23	200	OK
11752309	2002	Nucleic Acids Res	9.202	78	North Am	PMC99112	NA	30(1):255-9	MODBASE, a database of annotated comparative protein structure models.	http://guitar.rockefeller.edu/modbase	http://guitar.rockefeller.edu/modbase) is a rela:	NA	0	2017:2:7:11:25:26	500	Can't connect to guitar.rockefeller.edu:80
11752312	2002	Nucleic Acids Res	9.202	180	Europe	PMC99153	NA	30(1):268-72	SUPERFAMILY: HMMs representing all proteins of known structure. SCOP sequence searches, alignments and genome assignments.	http://supfam.org	http://supfam.org which pro:	NA	1	2017:2:7:11:25:26	200	OK
11752318	2002	Nucleic Acids Res	9.202	57	Asia	PMC99104	NA	30(1):294-8	GTOP: a database of protein structures predicted from genome sequences.	http://spock.genes.nig.ac.jp/~genome/gtop.html	http://spock.genes.nig.ac.jp/~genome/gtop.html.	NA	1	2017:2:7:11:25:26	200	OK
11752338	2002	Nucleic Acids Res	9.202	32	Europe	PMC99117	NA	30(1):364-8	NUREBASE: database of nuclear hormone receptors.	http://www.ens-lyon.fr/LBMC/laudet/nurebase.html	http://www.ens-lyon.fr/LBMC/laudet/nurebase.html.	NA	0	2017:2:7:11:25:31	404	Not Found
11752339	2002	Nucleic Acids Res	9.202	3	Asia	PMC99150	NA	30(1):369-71	AngioDB: database of angiogenesis and angiogenesis-related molecules.	http://angiodb.snu.ac.kr/	http://angiodb.snu.ac.kr/.	NA	0	2017:2:7:11:25:32	500	Can't connect to angiodb.snu.ac.kr:80
11752343	2002	Nucleic Acids Res	9.202	249	North Am	PMC99080	NA	30(1):383-4	InBase: the Intein Database.	http://www.neb.com/neb/inteins.html	http://www.neb.com/neb/inteins.html), the Intei:	NA	0	2017:2:7:11:25:32	404	Not Found
11752353	2002	Nucleic Acids Res	9.202	96	Europe	PMC99060	NA	30(1):416-7	RIDOM: Ribosomal Differentiation of Medical Micro-organisms Database.	http://www.ridom.de/	http://www.ridom.de/. The email:	NA	1	2017:2:7:11:25:34	200	OK
11790833	2002	Protein Sci	3.039	36	Europe	PMC2373435	10.1110/ps.16802	11(2):233-44	The CATH extended protein-family database: providing structural annotations for genome sequences.	http://www.biochem.ucl.ac.uk/bsm/cath_new	http://www.biochem.ucl.ac.uk/bsm/cath_new). DomainFin:	NA	1	2017:2:7:11:25:34	200	OK
11791237	2001	Genome Inform	NA	6	Europe	NA	NA	12:184-93	A mini-greedy algorithm for faster structural RNA stem-loop search.	http://www.bioinf.au.dk/slash	http://www.bioinf.au.dk/slash.	NA	0	2017:2:7:11:25:34	500	Can't connect to www.bioinf.au.dk:80
11836238	2002	Bioinformatics	5.766	311	Europe	NA	NA	18(1):213-4	Geno3D: automatic comparative molecular modelling of protein.	http://geno3d-pbil.ibcp.fr	http://geno3d-pbil.ibcp.fr) is an aut:	NA	0	2017:2:7:11:25:34	500	read timeout
11847095	2002	Bioinformatics	5.766	76	Europe	NA	NA	18(2):368-73	The EBI SRS server--recent developments.	http://srs.ebi.ac.uk	http://srs.ebi.ac.uk). The EBI S:	NA	1	2017:2:7:11:25:54	200	OK
11857509	2002	Teratology	NA	9	Asia	NA	10.1002/tera.10016	65(2):78-87	Design and development of an Internet registry for congenital heart defects.	http://rc.kfshrc.edu.sa/chdr/demo/	http://rc.kfshrc.edu.sa/chdr/demo/).	NA	1	2017:2:7:11:25:55	200	OK
11857738	2002	Hum Mutat	5.089	299	Europe	NA	10.1002/humu.10044	19(3):225-33	HbVar: A relational database of human hemoglobin variants and thalassemia mutations at the globin gene server.	http://globin.cse.psu.edu	http://globin.cse.psu.edu. Extensive:	NA	1	2017:2:7:11:25:57	200	OK
11858840	2002	Trends Genet	9.858	135	Europe	NA	10.1016/S0168-9525(01)02597-5	18(3):158-62	SHOT: a web server for the construction of genome phylogenies.	http://www.Bork.EMBL-Heidelberg.de/SHOT	http://www.Bork.EMBL-Heidelberg.de/SHOT.	NA	0	2017:2:7:11:25:57	503	Service Unavailable
11911710	2002	J Chem Inf Comput Sci	NA	NA	NA	NA	NA	42(2):405-7	A versatile structural domain analysis server using profile weight matrices.	http://www.bork.embl-heidelberg.de/AnDom	http://www.bork.embl-heidelberg.de/AnDom, and profi:	NA	0	2017:2:7:11:25:59	503	Service Unavailable
11932250	2002	Genome Res	11.351	3788	North Am	PMC187518	10.1101/gr.229202.ArticlepublishedonlinebeforeMarch200210.1101/gr.229202. Article published online before March 2002	12(4):656-64	BLAT--the BLAST-like alignment tool.	http://genome.ucsc.edu	http://genome.ucsc.edu hosts a w:	NA	1	2017:2:7:11:26:4	200	OK
11934753	2002	Bioinformatics	5.766	174	North Am	NA	NA	18(3):492-3	GRIMM: genome rearrangements web server.	http://grimm.ucsd.edu/cgi-bin/grimm.cgi	http://www-cse.ucsd.edu/groups/bioinformatics/GRIMM.	http://grimm.ucsd.edu/cgi-bin/grimm.cgi	1	2017:2:7:11:26:5	200	OK
11934755	2002	Bioinformatics	5.766	4	North Am	NA	NA	18(3):496-7	CASA: a server for the critical assessment of protein sequence alignment accuracy.	http://capb.dbi.udel.edu/casa	http://capb.dbi.udel.edu/casa.	NA	0	2017:2:7:11:26:6	500	Can't connect to capb.dbi.udel.edu:80
11934756	2002	Bioinformatics	5.766	17	NA	NA	10.1093/bioinformatics/18.3.498	18(3):498-9	BetaTPred: prediction of beta-TURNS in a protein using statistical algorithms.	http://imtech.res.in/raghava/betatpred/	http://imtech.res.in/raghava/betatpred/	NA	1	2017:2:7:11:26:6	200	OK
11948792	2002	Proteins	2.499	602	Europe	NA	10.1002/prot.10104	47(3):393-402	Increasing the precision of comparative models with YASARA NOVA--a self-parameterizing force field.	http://www.yasara.com/servers	http://www.yasara.com/servers	NA	0	2017:2:7:11:26:7	403	Forbidden
11955008	2002	J Mol Biol	4.517	135	Europe	NA	10.1006/jmbi.2002.5426	317(4):541-57	N-terminal N-myristoylation of proteins: prediction of substrate proteins from amino acid sequence.	http://mendel.imp.univie.ac.at/myristate/	http://mendel.imp.univie.ac.at/myristate/. Additiona:	NA	1	2017:2:7:11:26:8	200	OK
11956035	2002	J Med Internet Res	4.532	NA	NA	PMC1761927	10.2196/jmir.4.1.e3	4(1):e3	Web-based cognitive behavior therapy: analysis of site United Statesge and changes in depression and anxiety scores.	http://moodgym.anu.edu.au	http://moodgym.anu.edu.au) designed	NA	1	2017:2:7:11:26:8	200	OK
12028595	2002	BMC Bioinformatics	2.435	128	North Am	PMC116988	10.1186/1471-2105-3-14	03:14:00	RIO: analyzing proteomes by automated phylogenomics using resampled inference of orthologs.	http://www.genetics.wustl.edu/eddy/forester/	http://www.genetics.wustl.edu/eddy/forester/. A web ser:	NA	0	2017:2:7:11:26:11	404	Not Found
12050074	2002	Bioinformatics	5.766	27	Europe	NA	10.1093/bioinformatics/18.5.763	18(5):763-4	EMBL-Align: a new public nucleotide and amino acid multiple sequence alignment database.	http://www.ebi.ac.uk/embl/Submission/align_top.html	http://www.ebi.ac.uk/embl/Submission/align_top.html, EMBL-Alig:	NA	1	2017:2:7:11:26:13	200	OK
12050076	2002	Bioinformatics	5.766	36	Europe	NA	NA	18(5):767-8	ENDscript: a workflow to display sequence and structure information.	http://espript.ibcp.fr/ESPript/ENDscript/index.php	http://genopole.toulouse.inra.fr/ENDscript	http://espript.ibcp.fr/ESPript/ENDscript/indeNA.php	1	2017:2:7:11:26:14	200	OK
12075017	2002	Bioinformatics	5.766	80	Asia	NA	NA	18(6):819-24	NETASA: neural network based prediction of solvent accessibility.	http://www.netasa.org	http://www.netasa.org. Linux ix:	NA	1	2017:2:7:11:26:15	200	OK
12101404	2002	Nat Biotechnol	43.113	458	North Am	NA	10.1038/nbt717	20(8):835-9	An algorithm for finding protein-DNA binding sites with applications to chromatin-immunoprecipitation microarray experiments.	http://BioProspector.stanford.edu/MDscan/	http://BioProspector.stanford.edu/MDscan/.	NA	1	2017:2:7:11:26:15	200	OK
12105728	2002	J Digit Imaging	1.406	27	North Am	NA	10.1007/s10278-002-5046-5	15 Suppl 1:201-5	The completeness of existing lexicons for representing radiology report information.	http://umlsks.nlm.nih.gov	http://umlsks.nlm.nih. gov/), we:	http://umlsks.nlm.nih.gov	1	2017:2:7:11:26:16	200	OK
12109018	2002	Behav Res Methods Instrum Comput	NA	NA	NA	NA	NA	34(2):234-40	WEXTOR: a Web-based tool for generating and visualizing experimental designs and procedures.	http://www.genpsylab.unizh.ch/wextor/index.html	http://www.genpsylab.unizh.ch/wextor/index.html.	NA	0	2017:2:7:11:26:17	500	Can't connect to www.genpsylab.unizh.ch:80
12117803	2002	Bioinformatics	5.766	13	Europe	NA	NA	18(7):1017-9	SNAPper: gene order predicts gene function.	http://pedant.gsf.de/snapper	http://pedant.gsf.de/snapper. SNAPper-b:	NA	0	2017:2:7:11:26:17	404	Not Found
12118210	2002	Med Sci Monit	NA	26	Europe	NA	NA	8(7):MT124-36	Towards a semantic medical Web: HealthCyberMap's tool for building an RDF metadata base of health information resources based on the Qualified Dublin Core Metadata Set.	http://healthcybermap.semanticweb.org/	http://healthcybermap.semanticweb.org/) aims at m:	NA	1	2017:2:7:11:26:17	200	OK
12175724	2002	Hum Immunol	2.127	191	North Am	NA	10.1016/S0198-8859(02)00432-9	63(9):701-9	Prediction of MHC class I binding peptides using profile motifs.	www.mifoundation.org/Tools/rankpep.html	www.mifoundation.org/Tools/rankpep.html). In additi	NA	1	2017:2:7:11:26:18	200	OK
12176682	2002	Eur J Med Res	1.684	1	Europe	NA	NA	7(7):323-9	Radata - implementation of resistance analysis and expert advice for optimized HAART switches in general practice of HIV-infected individuals via a compiling internet presence.	www.radata.de	www.radata.de) with an a	NA	1	2017:2:7:11:26:18	200	OK
12176845	2002	Bioinformatics	5.766	74	Europe	NA	NA	18(8):1149-50	The EBI SRS server-new features.	http://srs.ebi.ac.uk	http://srs.ebi.ac.uk). SRS has b:	NA	1	2017:2:7:11:26:19	200	OK
12217927	2002	Bioinformatics	5.766	13	North Am	NA	NA	18(9):1280-1	An ontology driven architecture for derived representations of macromolecular structure.	http://openmms.sdsc.edu	http://openmms.sdsc.edu CONTACT:	NA	0	2017:2:7:11:26:19	500	read timeout
12386112	2002	J Am Med Inform Assoc	NA	108	North Am	PMC349378	10.1197/jamia.M1139	9(6):612-20	Creating an online dictionary of abbreviations from MEDLINE.	http://abbreviation.stanford.edu/]	http://abbreviation.stanford.edu/].	NA	0	2017:2:7:11:26:39	500	Can't connect to abbreviation.stanford.edu:80
12401134	2002	BMC Bioinformatics	2.435	39	North Am	PMC138791	10.1186/1471-2105-3-32	03:32:00	SeqHound: biological sequence and structure database as a platform for bioinformatics research.	http://sourceforge.net/projects/slritools/	http://sourceforge.net/projects/slritools/ in the SL:	NA	1	2017:2:7:11:26:39	200	OK
12433399	2002	Hear Res	NA	4	North Am	NA	10.1016/S0378-5955(02)00641-X	174(1-2):86-92	Radiation hybrid mapping of five muscarinic acetylcholine receptor subtype genes in Rattus norvegicus.	www.rgd.mcw.edu/RHMAP	www.rgd.mcw.edu/RHMAP SERVER/),	NA	0	2017:2:7:11:26:41	404	Not Found
12437788	2002	Int J Health Geogr	2.27	NA	NA	PMC131013	NA	1(1):1	A simple method for serving Web hypermaps with dynamic database drill-down.	http://healthcybermap.semanticweb.org	http://healthcybermap.semanticweb.org aims at m:	NA	1	2017:2:7:11:26:41	200	OK
12456970	2002	Acta Crystallogr B	2.892	18	Europe	NA	10.1107/S0108768102012120	58(Pt 6):921-33	Prediction of new displacive ferroelectrics through systematic pseudosymmetry search. Results for materials with Pba2 and Pmc21 symmetry.	http://www.cryst.ehu.es	http://www.cryst.ehu.es). In additi:	NA	1	2017:2:7:11:26:41	200	OK
12485704	2003	Int J Med Inform	2.363	9	North Am	NA	10.1016/S1386-5056(02)00080-1	69(1):57-62	International distance-learning outreach: the APEC EINet experience.	http://www.apec.org/infectious	http://www.apec.org/infectious). Emerging	NA	1	2017:2:7:11:26:41	200	OK
12499296	2003	Bioinformatics	5.766	223	North Am	NA	10.1093/bioinformatics/19.1.79	19(1):79-86	Mining gene expression databases for association rules.	http://dot.ped.med.umich.edu:2000/pub/assoc_rules/yeast_results.zip	http://dot.ped.med.umich.edu::2000/pub/assoc_rules/yeast_results.zip.	NA	0	2017:2:7:11:26:43	500	Can't connect to dot.ped.med.umich.edu:2000
12499297	2003	Bioinformatics	5.766	2	North Am	NA	10.1093/bioinformatics/19.1.87	19(1):87-9	MADGE: scalable distributed data management software for cDNA microarrays.	http://www.genomics.mcg.edu/niddkbtc	http://www.genomics.mcg.edu/niddkbtc.	NA	0	2017:2:7:11:27:3	500	Can't connect to www.genomics.mcg.edu:80
12499312	2003	Bioinformatics	5.766	636	Asia	NA	10.1093/bioinformatics/19.1.163	19(1):163-4	ConSurf: identification of functional regions in proteins by surface-mapping of phylogenetic information.	http://consurf.tau.ac.il	http://consurf.tau.ac.il. SUPPLEMEN:	NA	1	2017:2:7:11:27:3	200	OK
12499314	2003	Bioinformatics	5.766	8	Asia	NA	10.1093/bioinformatics/19.1.167	19(1):167-8	Detection of hydrogen-bond signature patterns in protein families.	http://144.16.93.115/hb_page/index.html	http://144.16.93.115/hb_page/index.html.	NA	0	2017:2:7:11:27:4	500	read timeout
12504859	2002	Genomics	2.386	24	North Am	NA	10.1006/geno.2002.7018	80(6):681-90	PipTools: a computational toolkit to annotate and analyze pairwise comparisons of genomic sequences.	http://bio.cse.psu.edu/	http://bio.cse.psu.edu/). We illust	NA	1	2017:2:7:11:27:24	200	OK
12507786	2003	Comput Methods Programs Biomed	NA	18	Europe	NA	10.1016/S0169-2607(02)00011-1	70(2):99-105	Use of correspondence discriminant analysis to predict the subcellular location of bacterial proteins.	http://pbil.univ-lyon1.fr/ADE-4/home?lang=eng	http://pbil.univ-lyon1.fr.	http://pbil.univ-lyon1.fr/ADE-4/home?lang=eng	1	2017:2:7:11:27:25	200	OK
12519959	2003	Nucleic Acids Res	9.202	21	Asia	PMC165449	10.1093/nar/gkg002	31(1):106-8	MICdb: database of prokaryotic microsatellites.	http://www.cdfd.org.in/micas	http://www.cdfd.org.in/micas) is a comp:	NA	0	2017:2:7:11:27:25	503	Service Unavailable
12519983	2003	Nucleic Acids Res	9.202	94	Europe	PMC165452	10.1093/nar/gkg005	31(1):207-11	The PEDANT genome database.	http://pedant.gsf.de	http://pedant.gsf.de) provides	NA	1	2017:2:7:11:27:25	200	OK
12520021	2003	Nucleic Acids Res	9.202	22	Europe	PMC165483	10.1093/nar/gkg036	31(1):353-8	RTKdb: database of Receptor Tyrosine Kinase.	http://pbil.univ-lyon1.fr/RTKdb/	http://pbil.univ-lyon1.fr/RTKdb/, or throug:	NA	0	2017:2:7:11:27:26	404	Not Found
12520022	2003	Nucleic Acids Res	9.202	125	North Am	PMC165457	10.1093/nar/gkg010	31(1):359-62	SDAP: database and computational tools for allergenic proteins.	http://fermi.utmb.edu/SDAP/	http://fermi.utmb.edu/SDAP/.	NA	1	2017:2:7:11:27:26	200	OK
12520023	2003	Nucleic Acids Res	9.202	89	Europe	PMC165554	10.1093/nar/gkg107	31(1):363-4	SRPDB: Signal Recognition Particle Database.	http://bio.lundberg.gu.se/dbs/SRPDB/SRPDB.html	http://bio.lundberg.gu.se/dbs/SRPDB/SRPDB.html assists i	NA	1	2017:2:7:11:27:27	200	OK
12520056	2003	Nucleic Acids Res	9.202	130	North Am	PMC165551	10.1093/nar/gkg104	31(1):478-82	MolMovDB: analysis and visualization of conformational change and structural flexibility.	http://MolMovDB.org	http://MolMovDB.org) is a coll:	NA	1	2017:2:7:11:27:27	200	OK
12538242	2003	Bioinformatics	5.766	63	Europe	NA	10.1093/bioinformatics/19.2.219	19(2):219-27	Gene finding with a hidden Markov model of genome structure and evolution.	http://www.birc.dk/Software/evogene	http://www.birc.dk/Software/evogene.	NA	0	2017:2:7:11:27:28	404	Not Found
12542405	2002	In Silico Biol	NA	14	Europe	NA	NA	2(3):195-205	AGenDA: gene prediction by comparative sequence analysis.	http://bibiserv.techfak.uni-bielefeld.de/dialign/	http://bibiserv.techfak.uni-bielefeld.de/dialign/ The gene-	NA	1	2017:2:7:11:27:28	200	OK
12577266	2003	Proteins	2.499	16	Europe	NA	10.1002/prot.10322	50(4):600-8	A neural network approach to evaluate fold recognition results.	http://www.pdg.cnb.uam.es/servers/libellula.html	http://www.pdg.cnb.uam.es/servers/libellula.html.	NA	0	2017:2:7:11:27:29	404	Not Found
12592033	2003	Protein Sci	3.039	101	Asia	PMC2312433	10.1110/ps.0228903	12(3):627-34	Prediction of beta-turns in proteins from multiple alignment using neural network.	http://www.imtech.res.in/raghava/betatpred2/	http://www.imtech.res.in/raghava/betatpred2/) has been	NA	1	2017:2:7:11:27:29	200	OK
12611805	2003	Bioinformatics	5.766	18	Europe	NA	10.1093/bioinformatics/btg023	19(4):500-5	MaxSubSeq: an algorithm for segment-length optimization. The case study of the transmembrane spanning segments.	http://gpcr.biocomp.unibo.it/	http://gpcr.biocomp.unibo.it/predictors/)	http://gpcr.biocomp.unibo.it/	1	2017:2:7:11:27:29	200	OK
12611806	2003	Bioinformatics	5.766	14	Europe	NA	10.1093/bioinformatics/btg016	19(4):506-12	Detection of unrelated proteins in sequences multiple alignments by using predicted secondary structures.	http://npsa-pbil.ibcp.fr	http://npsa-pbil.ibcp.fr)	NA	0	2017:2:7:11:27:30	500	read timeout
12611812	2003	Bioinformatics	5.766	2	Europe	NA	10.1093/bioinformatics/btg019	19(4):543	IS: a web-site for intron statistics.	http://www.icgeb.trieste.it/introns	http://www.icgeb.trieste.it/introns	NA	0	2017:2:7:11:27:50	404	Not Found
12701903	2003	Water Sci Technol	1.064	43	North Am	NA	NA	47(5):31-7	Automated biofilm morphology quantification from confocal laser scanning microscopy imaging.	http://www.itqb.unl.pt:111/clsmip/	http://www.itqb.unl.pt::111/clsmip/. Its use i:	NA	0	2017:2:7:11:27:50	500	Can't connect to www.itqb.unl.pt:111
12724305	2003	Bioinformatics	5.766	83	Europe	NA	10.1093/bioinformatics/btg110	19(7):899-900	SCide: identification of stabilization centers in proteins.	http://www.enzim.hu/scide	http://www.enzim.hu/scide. The sourc:	NA	0	2017:2:7:11:28:11	404	Not Found
12724307	2003	Bioinformatics	5.766	16	Europe	NA	10.1093/bioinformatics/btg091	19(7):903-4	IPPRED: server for proteins interactions inference.	http://cbi.labri.fr/outils/ippred/	http://cbi.labri.fr/outils/ippred/.	NA	0	2017:2:7:11:28:11	500	Can't connect to www.cbib.u-bordeaux.fr:443 (certificate verify failed)
12731075	2003	Anat Rec B New Anat	NA	27	North Am	NA	10.1002/ar.b.10017	272(1):91-7	Using a modified standard microscope to generate virtual slides.	http://virtualmicroscope.osu.edu	http://virtualmicroscope.osu.edu.	NA	0	2017:2:7:11:28:11	500	read timeout
12761064	2003	Bioinformatics	5.766	159	Asia	NA	10.1093/bioinformatics/btg108	19(8):1009-14	ProPred1: prediction of promiscuous MHC Class-I binding sites.	http://www.imtech.res.in/raghava/propred1/page2.html	http://www.imtech.res.in/raghava/propred1/page2.html	NA	1	2017:2:7:11:28:32	200	OK
12761065	2003	Bioinformatics	5.766	605	Europe	NA	10.1093/bioinformatics/btg124	19(8):1015-8	3D-Jury: a simple approach to improve protein structure predictions.	http://BioInfo.PL/LiveBench/	http://BioInfo.PL/LiveBench/)	NA	0	2017:2:7:11:28:33	404	Not Found
12761069	2003	Bioinformatics	5.766	1	Europe	NA	10.1093/bioinformatics/btg116	19(8):1037-8	Visual representation of database search results: the RHIMS Plot.	http://www.compbio.dundee.ac.uk	http://www.compbio.dundee.ac.uk. The RHIMS:	NA	1	2017:2:7:11:28:34	200	OK
12766400	2003	J Biomol NMR	3.439	107	North Am	NA	10.1023/A:1023060720156	26(1):25-37	PROSHIFT: protein chemical shift prediction using artificial neural networks.	http://www.meilerlab.org/index.php/servers/show?s_id=9	www.jens-meiler.de/proshift.html	http://www.meilerlab.org/indeNA.php/servers/show?s_id=9	1	2017:2:7:11:28:34	200	OK
12766419	2003	J Biomol NMR	3.439	383	North Am	NA	10.1023/A:1023812930288	26(3):215-40	Rapid and accurate calculation of protein 1H, 13C and 15N chemical shifts.	http://shiftx.wishartlab.com/	http://redpoll.pharmacy.ualberta.ca.	http://shiftNA.wishartlab.com/	1	2017:2:7:11:28:37	200	OK
12801877	2003	Bioinformatics	5.766	18	Asia	NA	10.1093/bioinformatics/btg143	19(9):1153-4	Coupled two-way clustering server.	http://ctwc.weizmann.ac.il	http://ctwc.weizmann.ac.il. SUPPLEMEN:	NA	0	2017:2:7:11:28:38	302	Found
12820902	2003	BMC Bioinformatics	2.435	238	North Am	PMC166152	10.1186/1471-2105-4-25	04:25:00	AGRIS: Arabidopsis gene regulatory information server, an information resource of Arabidopsis cis-regulatory elements and transcription factors.	http://arabidopsis.med.ohio-state.edu	http://arabidopsis.med.ohio-state.edu.	NA	1	2017:2:7:11:28:39	200	OK
12824309	2003	Nucleic Acids Res	9.202	58	Europe	PMC168910	10.1093/nar/gkg503	31(13):3291-2	Detection of reliable and unexpected protein fold predictions using 3D-Jury.	http://www.mojapolska.org/	http://BioInfo.PL/Meta). This is o	http://www.mojapolska.org/	0	2017:2:7:11:28:39	401	Unauthorized
12824311	2003	Nucleic Acids Res	9.202	31	North Am	PMC168948	10.1093/nar/gkg541	31(13):3296-9	PROTINFO: Secondary and tertiary protein structure prediction.	http://protinfo.compbio.washington.edu	http://protinfo.compbio.washington.edu.	NA	0	2017:2:7:11:28:39	500	read timeout
12824312	2003	Nucleic Acids Res	9.202	153	North Am	PMC168915	10.1093/nar/gkg508	31(13):3300-4	The PredictProtein server.	http://cubic.bioc.columbia.edu/pp/	http://cubic.bioc.columbia.edu/pp/) is an int:	NA	0	2017:2:7:11:29:0	500	Can't connect to cubic.bioc.columbia.edu:80
12824313	2003	Nucleic Acids Res	9.202	295	Europe	PMC168964	10.1093/nar/gkg557	31(13):3305-7	GeneSilico protein structure prediction meta-server.	https://www.genesilico.pl/meta2/	http://genesilico.pl/meta.	https://www.genesilico.pl/meta2/	1	2017:2:7:11:29:0	200	OK
12824314	2003	Nucleic Acids Res	9.202	11	North Am	PMC168978	10.1093/nar/gkg572	31(13):3308-10	META-PP: single interface to crucial prediction servers.	http://cubic.bioc.columbia.edu/meta/	http://cubic.bioc.columbia.edu/meta/) simplifie:	NA	0	2017:2:7:11:29:0	500	Can't connect to cubic.bioc.columbia.edu:80
12824315	2003	Nucleic Acids Res	9.202	115	North Am	PMC169025	10.1093/nar/gkg619	31(13):3311-5	EVA: Evaluation of protein structure prediction servers.	http://cubic.bioc.columbia.edu/eva/	http://cubic.bioc.columbia.edu/eva/) is a web	NA	0	2017:2:7:11:29:0	500	Can't connect to cubic.bioc.columbia.edu:80
12824316	2003	Nucleic Acids Res	9.202	318	North Am	PMC168972	10.1093/nar/gkg565	31(13):3316-9	VADAR: a web server for quantitative evaluation of protein structure quality.	http://redpoll.pharmacy.ualberta.ca/vadar	http://redpoll.pharmacy.ualberta.ca/vadar.	NA	1	2017:2:7:11:29:0	200	OK
12824317	2003	Nucleic Acids Res	9.202	765	Europe	PMC168963	10.1093/nar/gkg556	31(13):3320-3	ESPript/ENDscript: Extracting and rendering sequence and 3D information from atomic structures of proteins.	http://genopole.toulouse.inra.fr/ESPript	http://genopole.toulouse.inra.fr/ESPript.	NA	0	2017:2:7:11:29:1	404	Not Found
12824321	2003	Nucleic Acids Res	9.202	28	North Am	PMC168921	10.1093/nar/gkg514	31(13):3337-40	LOC3D: annotate sub-cellular localization for protein structures.	http://cubic.bioc.columbia.edu/db/LOC3d/	http://cubic.bioc.columbia.edu/db/LOC3d/) is both a:	NA	0	2017:2:7:11:29:1	500	Can't connect to cubic.bioc.columbia.edu:80
12824323	2003	Nucleic Acids Res	9.202	67	Europe	PMC168935	10.1093/nar/gkg528	31(13):3345-8	NCI: A server to identify non-canonical interactions in protein structures.	http://www.mrc-lmb.cam.ac.uk/genomes/nci/	http://www.mrc-lmb.cam.ac.uk/genomes/nci/.	NA	1	2017:2:7:11:29:1	200	OK
12824324	2003	Nucleic Acids Res	9.202	37	North Am	PMC168994	10.1093/nar/gkg588	31(13):3349-51	MolSurfer: A macromolecular interface navigator.	http://projects.villa-bosch.de/mcm/software/molsurfer	http://projects.villa-bosch.de/mcm/software/molsurfer.	NA	1	2017:2:7:11:29:1	200	OK
12824329	2003	Nucleic Acids Res	9.202	165	Asia	PMC168987	10.1093/nar/gkg581	31(13):3367-9	MATRAS: A program for protein 3D structure comparison.	http://biunit.aist-nara.ac.jp/matras	http://biunit.aist-nara.ac.jp/matras). An advant:	NA	0	2017:2:7:11:29:2	500	Can't connect to biunit.aist-nara.ac.jp:80
12824331	2003	Nucleic Acids Res	9.202	294	North Am	PMC168950	10.1093/nar/gkg543	31(13):3375-80	Tools for comparative protein structure modeling and analysis.	http://salilab.org	http://salilab.org):: MODELLER,:	http://salilab.org	1	2017:2:7:11:29:2	200	OK
12824332	2003	Nucleic Acids Res	9.202	3312	Europe	PMC168927	10.1093/nar/gkg520	31(13):3381-5	SWISS-MODEL: An automated protein homology-modeling server.	http://swissmodel.expasy.org	http://swissmodel.expasy.org) is a serv:	NA	1	2017:2:7:11:29:3	200	OK
12824334	2003	Nucleic Acids Res	9.202	32	Europe	PMC168937	10.1093/nar/gkg530	31(13):3393-9	Integrated databanks access and sequence/structure analysis services at the PBIL.	https://prabi.ibcp.fr/htm/site/web/home, http://doua.prabi.fr/databases/	http://pbil.univ-lyon1.fr.	https://prabi.ibcp.fr/htm/site/web/home, http://doua.prabi.fr/databases/	0	2017:2:7:11:29:3	500	Can't connect to prabi.ibcp.fr:443
12824336	2003	Nucleic Acids Res	9.202	4	Asia	PMC168914	10.1093/nar/gkg507	31(13):3404-5	SSEP: Secondary structural elements of proteins.	http://cluster.physics.iisc.ernet.in/ssep/	http://cluster.physics.iisc.ernet.in/ssep/ or http::/:	NA	1	2017:2:7:11:29:23	200	OK
12824337	2003	Nucleic Acids Res	9.202	NA	NA	PMC169194	NA	31(13):3406-15	Mfold web server for nucleic acid folding and hybridization prediction.	http://unafold.rna.albany.edu/?q=mfold	http://www.bioinfo.rpi.edu/applications/mfold. This URL	http://unafold.rna.albany.edu/?q=mfold	1	2017:2:7:11:29:24	200	OK
12824339	2003	Nucleic Acids Res	9.202	279	Europe	PMC169020	10.1093/nar/gkg614	31(13):3423-8	Pfold: RNA secondary structure prediction using stochastic context-free grammars.	http://www.daimi.au.dk/~compbio/pfold	http://www.daimi.au.dk/~compbio/pfold.	NA	1	2017:2:7:11:29:25	200	OK
12824340	2003	Nucleic Acids Res	9.202	1269	Europe	PMC169005	10.1093/nar/gkg599	31(13):3429-31	Vienna RNA secondary structure server.	http://rna.tbi.univie.ac.at/	http://rna.tbi.univie.ac.at/.	NA	1	2017:2:7:11:29:25	200	OK
12824342	2003	Nucleic Acids Res	9.202	28	Europe	PMC168974	10.1093/nar/gkg568	31(13):3441-5	A software tool-box for analysis of regulatory RNA elements.	http://wb2x01.biozentrum.uni-wuerzburg.de/	http://wb2x01.biozentrum.uni-wuerzburg.de/.	NA	1	2017:2:7:11:29:25	200	OK
12824344	2003	Nucleic Acids Res	9.202	163	Europe	PMC168936	10.1093/nar/gkg529	31(13):3450-60	Tools for the automatic identification and classification of RNA base pairs.	http://ndbserver.rutgers.edu/	http://ndbserver.rutgers.edu/services/. The appli:	http://ndbserver.rutgers.edu/	1	2017:2:7:11:29:25	200	OK
12824345	2003	Nucleic Acids Res	9.202	154	Europe	PMC168997	10.1093/nar/gkg591	31(13):3461-7	GEPAS: A web-based resource for microarray gene expression data analysis.	http://gepas.bioinfo.cnio.es	http://gepas.bioinfo.cnio.es). GEPAS is	NA	0	2017:2:7:11:29:25	500	Can't connect to gepas.bioinfo.cnio.es:80
12824347	2003	Nucleic Acids Res	9.202	28	Europe	PMC169191	10.1093/nar/gkg629	31(13):3471-6	GenePublisher: Automated analysis of DNA microarray data.	http://www.cbs.dtu.dk/services/GenePublisher	http://www.cbs.dtu.dk/services/GenePublisher. Raw data	NA	1	2017:2:7:11:29:25	200	OK
12824350	2003	Nucleic Acids Res	9.202	37	North Am	PMC169192	10.1093/nar/gkg630	31(13):3487-90	REDUCE: An online tool for inferring cis-regulatory elements and transcriptional module activities from microarray data.	http://bussemaker.bio.columbia.edu/reduce/	http://bussemaker.bio.columbia.edu/reduce/. This web	NA	0	2017:2:7:11:29:26	500	read timeout
12824353	2003	Nucleic Acids Res	9.202	32	Asia	PMC168909	10.1093/nar/gkg502	31(13):3501-2	CLOURE: Clustal Output Reformatter, a program for reformatting ClustalX/ClustalW outputs for SNP analysis and molecular systematics.	http://imtech.res.in/~anand/cloure.html	http://imtech.res.in/~anand/cloure.html.	NA	0	2017:2:7:11:29:46	404	Not Found
12824354	2003	Nucleic Acids Res	9.202	200	Europe	PMC168929	10.1093/nar/gkg522	31(13):3503-6	Tcoffee@igs: A web server for computing, evaluating and combining multiple sequence alignments.	http://igs-server.cnrs-mrs.fr/Tcoffee/	http://igs-server.cnrs-mrs.fr/Tcoffee/.	NA	0	2017:2:7:11:29:46	500	Can't connect to igs-server.cnrs-mrs.fr:80
12824355	2003	Nucleic Acids Res	9.202	NA	NA	PMC168989	NA	31(13):3507-9	SLAM web server for comparative gene finding and alignment.	http://bio.math.berkeley.edu/slam	http://bio.math.berkeley.edu/slam.	NA	1	2017:2:7:11:29:46	200	OK
12824357	2003	Nucleic Acids Res	9.202	164	North Am	PMC168985	10.1093/nar/gkg579	31(13):3518-24	MultiPipMaker and supporting tools: Alignments and analysis of multiple genomic DNA sequences.	http://pipmaker.bx.psu.edu/cgi-bin/multipipmaker	http://bio.cse.psu.edu/ since May	http://pipmaker.bNA.psu.edu/cgi-bin/multipipmaker	1	2017:2:7:11:29:48	200	OK
12824358	2003	Nucleic Acids Res	9.202	48	North Am	PMC169029	10.1093/nar/gkg623	31(13):3525-6	MAVID multiple alignment server.	http://baboon.math.berkeley.edu/mavid/	http://baboon.math.berkeley.edu/mavid/.	NA	0	2017:2:7:11:29:48	500	read timeout
12824360	2003	Nucleic Acids Res	9.202	27	Asia	PMC168968	10.1093/nar/gkg561	31(13):3533-6	MGAlignIt: A web service for the alignment of mRNA/EST and genomic sequences.	http://origin.bic.nus.edu.sg/mgalign/mgalignit	http://origin.bic.nus.edu.sg/mgalign/mgalignit), based on	NA	0	2017:2:7:11:30:9	500	Can't connect to origin.bic.nus.edu.sg:80
12824361	2003	Nucleic Acids Res	9.202	260	Europe	PMC169015	10.1093/nar/gkg609	31(13):3537-9	RevTrans: Multiple alignment of coding DNA from aligned amino acid sequences.	http://www.cbs.dtu.dk/services/RevTrans/	http://www.cbs.dtu.dk/services/RevTrans/.	NA	1	2017:2:7:11:30:9	200	OK
12824374	2003	Nucleic Acids Res	9.202	48	North Am	PMC168940	10.1093/nar/gkg533	31(13):3597-600	GeneSeqer@PlantGDB: Gene structure prediction in plant genomes.	http://www.plantgdb.org/cgi-bin/GeneSeqer.cgi	http://www.plantgdb.org/cgi-bin/GeneSeqer.cgi) provides	NA	0	2017:2:7:11:30:9	404	Not Found
12824379	2003	Nucleic Acids Res	9.202	7	Europe	PMC169017	10.1093/nar/gkg611	31(13):3618-20	Signal search analysis server.	http://www.isrec.isb-sib.ch/ssa/	http://www.isrec.isb-sib.ch/ssa/.	NA	0	2017:2:7:11:30:10	500	Can't connect to www.isrec.isb-sib.ch:80
12824380	2003	Nucleic Acids Res	9.202	92	Europe	PMC168917	10.1093/nar/gkg510	31(13):3621-4	MHCPred: A server for quantitative prediction of peptide-MHC binding.	http://www.jenner.ac.uk/MHCPred	http://www.jenner.ac.uk/MHCPred.	NA	0	2017:2:7:11:30:10	404	Not Found
12824381	2003	Nucleic Acids Res	9.202	442	Europe	PMC168952	10.1093/nar/gkg545	31(13):3625-30	ELM server: A new resource for investigating short functional sites in modular eukaryotic proteins.	http://elm.eu.org/	http://elm.eu.org/, is a new	NA	1	2017:2:7:11:30:10	200	OK
12824384	2003	Nucleic Acids Res	9.202	31	North Am	PMC168939	10.1093/nar/gkg532	31(13):3642-4	Static benchmarking of membrane helix predictions.	http://cubic.bioc.columbia.edu/services/tmh_benchmark/	http://cubic.bioc.columbia.edu/services/tmh_benchmark/). The most	NA	0	2017:2:7:11:30:10	500	Can't connect to cubic.bioc.columbia.edu:80
12824385	2003	Nucleic Acids Res	9.202	4	Asia	PMC169027	10.1093/nar/gkg621	31(13):3645-50	The web server of IBM's Bioinformatics and Pattern Discovery group.	http://cbcsrv.watson.ibm.com/Annotations/	http://cbcsrv.watson.ibm.com/Annotations/.	NA	0	2017:2:7:11:30:10	500	Can't connect to cbcsrv.watson.ibm.com:80
12824386	2003	Nucleic Acids Res	9.202	282	Europe	PMC169011	10.1093/nar/gkg605	31(13):3651-3	Identification of patterns in biological sequences at the ALGGEN server: PROMO and MALGEN.	http://www.lsi.upc.es/~alggen	http://www.lsi.upc.es/~alggen (RESEARCH:	NA	1	2017:2:7:11:30:10	200	OK
12824389	2003	Nucleic Acids Res	9.202	165	North Am	PMC168947	10.1093/nar/gkg540	31(13):3666-8	Cluster-Buster: Finding dense clusters of motifs in DNA sequences.	https://zlab.bu.edu/cluster-buster/cbust.html	http://zlab.bu.edu/cluster-buster/.	https://zlab.bu.edu/cluster-buster/cbust.html	0	2017:2:7:11:30:11	500	Can't connect to zlab.bu.edu:443 (certificate verify failed)
12824394	2003	Nucleic Acids Res	9.202	83	Europe	PMC168966	10.1093/nar/gkg559	31(13):3686-7	DNA analysis servers: plot.it, bend.it, model.it and IS.	http://www.icgeb.trieste.it/dna/	http://www.icgeb.trieste.it/dna/ are dedic:	NA	1	2017:2:7:11:30:11	200	OK
12824395	2003	Nucleic Acids Res	9.202	275	North Am	PMC168933	10.1093/nar/gkg526	31(13):3688-91	NEBcutter: A program to cleave DNA with restriction enzymes.	http://tools.neb.com/NEBcutter	http://tools.neb.com/NEBcutter) that will:	NA	1	2017:2:7:11:30:11	200	OK
12824397	2003	Nucleic Acids Res	9.202	31	Europe	PMC168961	10.1093/nar/gkg554	31(13):3698-700	BPROMPT: A consensus server for membrane protein prediction.	http://www.jenner.ac.uk/BPROMPT	http://www.jenner.ac.uk/BPROMPT.	NA	0	2017:2:7:11:30:12	404	Not Found
12824400	2003	Nucleic Acids Res	9.202	70	Europe	PMC168988	10.1093/nar/gkg582	31(13):3712-5	Automated Gene Ontology annotation for anonymous sequence data.	http://goblet.molgen.mpg.de	http://goblet.molgen.mpg.de.	NA	1	2017:2:7:11:30:13	200	OK
12824402	2003	Nucleic Acids Res	9.202	11	Europe	PMC169009	10.1093/nar/gkg603	31(13):3720-2	Phydbac (phylogenomic display of bacterial genes): An interactive resource for the annotation of bacterial genomes.	http://igs-server.cnrs-mrs.fr/phydbac/	http://igs-server.cnrs-mrs.fr/phydbac/.	NA	0	2017:2:7:11:30:13	500	Can't connect to igs-server.cnrs-mrs.fr:80
12824406	2003	Nucleic Acids Res	9.202	18	North Am	PMC168957	10.1093/nar/gkg550	31(13):3736-7	Bioverse: Functional, structural and contextual annotation of proteins and proteomes.	http://bioverse.compbio.washington.edu	http://bioverse.compbio.washington.edu) provides	NA	0	2017:2:7:11:30:13	500	read timeout
12824414	2003	Nucleic Acids Res	9.202	14	Europe	PMC168982	10.1093/nar/gkg576	31(13):3767-70	RNA-related tools on the Bielefeld Bioinformatics Server.	http://bibiserv.techfak.uni-bielefeld.de	http://bibiserv.techfak.uni-bielefeld.de).	NA	1	2017:2:7:11:30:33	200	OK
12824415	2003	Nucleic Acids Res	9.202	14	Europe	PMC168953	10.1093/nar/gkg546	31(13):3771-4	SIRW: A web server for the Simple Indexing and Retrieval System that combines sequence motif searches with keyword searches.	http://sirw.embl.de/	http://sirw.embl.de/) is a Worl:	NA	1	2017:2:7:11:30:33	200	OK
12824417	2003	Nucleic Acids Res	9.202	8	Europe	PMC168954	10.1093/nar/gkg547	31(13):3782-3	Swiss EMBnet node web server.	http://www.ch.embnet.org	http://www.ch.embnet.org), which pre:	NA	1	2017:2:7:11:30:33	200	OK
12824418	2003	Nucleic Acids Res	9.202	NA	NA	PMC168970	NA	31(13):3784-8	ExPASy: The proteomics server for in-depth protein knowledge and analysis.	http://www.expasy.org	http://www.expasy.org), is provid:	NA	1	2017:2:7:11:30:33	200	OK
12824420	2003	Nucleic Acids Res	9.202	2	Europe	PMC168942	10.1093/nar/gkg535	31(13):3792-4	BLAST2SRS, a web server for flexible retrieval of related protein sequences in the SWISS-PROT and SPTrEMBL databases.	http://blast2srs.embl.de/	http://blast2srs.embl.de/) aims to	NA	0	2017:2:7:11:30:34	500	Can't connect to blast2srs.embl.de:80
12824421	2003	Nucleic Acids Res	9.202	98	North Am	PMC168979	10.1093/nar/gkg573	31(13):3795-8	WU-Blast2 server at the European Bioinformatics Institute.	http://www.ebi.ac.uk/blast2/	http://www.ebi.ac.uk/blast2/) server ha:	NA	0	2017:2:7:11:30:34	404	Not Found
12824423	2003	Nucleic Acids Res	9.202	106	Europe	PMC168911	10.1093/nar/gkg504	31(13):3804-7	ORFeus: Detection of distant homology using sequence profiles and predicted secondary structure.	http://BioInfo.PL/Meta/	http://BioInfo.PL/Meta/). The goal	NA	0	2017:2:7:11:30:36	401	Unauthorized
12824429	2003	Nucleic Acids Res	9.202	16	Asia	PMC168999	10.1093/nar/gkg593	31(13):3824-8	Comprehensive quantitative analyses of the effects of promoter sequence elements on mRNA transcription.	http://longitude.weizmann.ac.il/rMotif/	http://longitude.weizmann.ac.il/rMotif/.	NA	1	2017:2:7:11:30:36	200	OK
12824430	2003	Nucleic Acids Res	9.202	98	Europe	PMC168925	10.1093/nar/gkg518	31(13):3829-32	PipeAlign: A new toolkit for protein family analysis.	http://igbmc.u-strasbg.fr/PipeAlign/	http://igbmc.u-strasbg.fr/PipeAlign/.	NA	0	2017:2:7:11:30:36	500	Can't connect to igbmc.u-strasbg.fr:80
12824432	2003	Nucleic Acids Res	9.202	20	Asia	PMC168965	10.1093/nar/gkg558	31(13):3836-9	Biological SOAP servers and web services provided by the public sequence data bank.	http://www.xml.nig.ac.jp/	http://www.xml.nig.ac.jp/.	NA	0	2017:2:7:11:30:36	500	Can't connect to www.xml.nig.ac.jp:80
12824439	2003	Nucleic Acids Res	9.202	NA	NA	PMC168945	NA	31(13):3866-8	Update on XplorMed: A web server for exploring scientific literature.	http://xplormed.ogic.ca/	http://www.bork.embl-heidelberg.de/xplormed/).	http://NAplormed.ogic.ca/	1	2017:2:7:11:30:36	200	OK
12824500	2003	Protein Sci	3.039	58	North Am	PMC2323935	10.1110/ps.0305103	12(7):1547-55	Predicting the topology of transmembrane helical proteins using mean burial propensity and a hidden-Markov-model-based method.	http://www.smbs.buffalo.edu/phys_bio/service.htm	http://www.smbs.buffalo.edu/phys_bio/service.htm. The 3D he:	NA	1	2017:2:7:11:30:37	200	OK
12835274	2003	Bioinformatics	5.766	60	Europe	NA	10.1093/bioinformatics/btg137	19(10):1290-1	The DynDom database of protein domain motions.	http://www.sys.uea.ac.uk/dyndom	http://www.sys.uea.ac.uk/dyndom.	NA	0	2017:2:7:11:30:37	500	Can't connect to www.sys.uea.ac.uk:80
12854962	2003	J Biomol Struct Dyn	2.3	10	Asia	NA	10.1080/07391102.2003.10506908	21(1):99-109	Gene recognition from questionable ORFs in bacterial and archaeal genomes.	http://tubic.tju.edu.cn/ZCURVE_C_html/noncoding.html	http://tubic.tju.edu.cn/ZCURVE_C_html/noncoding.html. The worki:	NA	1	2017:2:7:11:30:37	200	OK
12855466	2003	Bioinformatics	5.766	1	South Am	NA	10.1093/bioinformatics/btg1034	19 Suppl 1:i250-1	A tool to assist the study of specific features at protein binding sites.	http://protein.bio.puc.cl	http://protein.bio.puc.cl	NA	1	2017:2:7:11:30:40	200	OK
12866056	2003	Proteins	2.499	9	North Am	NA	10.1002/prot.10441	52(3):454-65	Characterization of sequence variability in nucleosome core histone folds.	http://www.ebi.ac.uk/thornton-srv/databases/cgi-bin/valdar/scorecons_server.pl	http://www.ebi.ac.uk/thornton-srv/databases/cgi-bin/valdar/scorecons_server.pl) to score:	NA	1	2017:2:7:11:30:41	200	OK
12874050	2003	Bioinformatics	5.766	28	North Am	NA	10.1093/bioinformatics/btg164	19(11):1381-90	Identifying property based sequence motifs in protein families and superfamilies: application to DNase-1 related endonucleases.	http://www.scsb.utmb.edu/masia/masia.html	http://www.scsb.utmb.edu/comp_biol.html/DNA_repair/publication.html	NA	0	2017:2:7:11:30:42	500	Can't connect to www.scsb.utmb.edu:443
12876315	2003	Protein Sci	3.039	541	Europe	PMC2323952	10.1110/ps.0303703	12(8):1652-62	Prediction of lipoprotein signal peptides in Gram-negative bacteria.	www.cbs.dtu.dk/services/LipoP/	www.cbs.dtu.dk/services/LipoP/.	NA	1	2017:2:7:11:30:43	200	OK
12912840	2003	Bioinformatics	5.766	16	Europe	NA	10.1093/bioinformatics/btg181	19(12):1575-7	AGenDA: homology-based gene prediction.	https://bibiserv2.cebitec.uni-bielefeld.de/agenda	www server fo	https://bibiserv2.cebitec.uni-bielefeld.de/agenda	1	2017:2:7:11:30:43	200	OK
12971699	2003	Int J Hyg Environ Health	NA	19	North Am	NA	10.1078/1438-4639-00240	206(4-5):437-45	Toxicity characterization of environmental chemicals by the US National Toxicology Program: an overview.	http://ntp-server.niehs.nih.gov	http://ntp-server.niehs.nih.gov) and are a:	NA	0	2017:2:7:11:30:43	500	Can't connect to ntp-server.niehs.nih.gov:443
14511568	2003	Hybrid Hybridomics	NA	21	Asia	NA	10.1089/153685903322328956	22(4):229-34	Prediction of promiscuous and high-affinity mutated MHC binders.	www.imtech.res.in/raghava/mmbpred/	www.imtech.res.in/raghava/mmbpred/.	NA	1	2017:2:7:11:30:44	200	OK
14512345	2003	Bioinformatics	5.766	63	Europe	NA	10.1093/bioinformatics/btg240	19(14):1748-59	Recognizing the fold of a protein structure.	http://www.biochem.ucl.ac.uk/cgi-bin/cath/Grath.pl	http://www.biochem.ucl.ac.uk/cgi-bin/cath/Grath.pl). GRATH's s:	NA	0	2017:2:7:11:30:45	403	Forbidden
14512356	2003	Bioinformatics	5.766	68	Europe	NA	10.1093/bioinformatics/btg251	19(14):1837-43	The design of Jemboss: a graphical user interface to EMBOSS.	http://www.uk.embnet.org/Software/EMBOSS/Jemboss/	http://www.uk.embnet.org/Software/EMBOSS/Jemboss/	NA	0	2017:2:7:11:30:45	500	Can't connect to www.uk.embnet.org:80
14554134	2003	Comput Methods Programs Biomed	NA	14	Europe	NA	10.1016/S0169-2607(02)00146-3	72(3):197-208	A meta-data-based learning resource server for medicine.	http://www.lrsmed.de/	http://mmedia.medizin.uni-essen.de/portal/. More than:	http://www.lrsmed.de/	1	2017:2:7:11:30:45	200	OK
14555633	2003	Bioinformatics	5.766	15	North Am	NA	10.1093/bioinformatics/btg262	19(15):1985-96	A computational pipeline for protein structure prediction and analysis at genome scale.	http://compbio.ornl.gov/proteinpipeline/	http://compbio.ornl.gov/proteinpipeline/	NA	0	2017:2:7:11:30:45	403	Forbidden
14570424	2003	Environ Monit Assess	1.633	2	North Am	NA	10.1023/A:1025541712148	88(1-3):389-97	Sharing the geo-referenced results of climate change impact research.	www.parc.ca	www.parc.ca) to 1) dis	NA	1	2017:2:7:11:30:46	200	OK
14579325	2003	Proteins	2.499	127	Europe	NA	10.1002/prot.10545	53 Suppl 6:369-79	A FRankenstein's monster approach to comparative modeling: merging the finest fragments of Fold-Recognition models and iterative model refinement aided by 3D structure evaluation.	http://genesilico.pl/meta/	http://genesilico.pl/meta/.	NA	1	2017:2:7:11:30:46	200	OK
14579345	2003	Proteins	2.499	26	North Am	NA	10.1002/prot.10534	53 Suppl 6:548-60	CAFASP3 in the spotlight of EVA.	http://cubic.bioc.columbia.edu/eva/cafasp3/	http://cubic.bioc.columbia.edu/eva/cafasp3/. We observ:	NA	0	2017:2:7:11:30:46	500	Can't connect to cubic.bioc.columbia.edu:80
14625849	2003	Proteomics	4.079	11	Europe	NA	10.1002/pmic.200300559	3(10):1874-82	Proteome of Caulobacter crescentus cell cycle publicly accessible on SWICZ server.	http://proteom.biomed.cas.cz	http://proteom.biomed.cas.cz), which all:	NA	1	2017:2:7:11:30:47	200	OK
14629779	2003	BMC Bioinformatics	2.435	1	Europe	PMC317281	10.1186/1471-2105-4-58	04:58:00	Online tool for the discrimination of equi-distributions.	http://bioinf.charite.de/equifreq/	http://bioinf.charite.de/equifreq/. CONCLUSIO	NA	0	2017:2:7:11:30:47	404	Not Found
14629978	2004	J Mol Graph Model	1.674	34	Europe	NA	10.1016/S1093-3263(03)00160-8	22(3):195-207	Quantitative online prediction of peptide binding to the major histocompatibility complex.	http://www.jenner.ac.uk/MHCPred	http://www.jenner.ac.uk/MHCPred. We have e:	NA	0	2017:2:7:11:30:47	404	Not Found
14630658	2003	Bioinformatics	5.766	61	North Am	NA	10.1093/bioinformatics/btg317	19(17):2294-301	Efficient remote homology detection using local structure.	http://www.bioinfo.rpi.edu	http://www.bioinfo.rpi.edu. Programs	NA	1	2017:2:7:11:30:47	200	OK
14630670	2003	Bioinformatics	5.766	34	Europe	NA	10.1093/bioinformatics/btg321	19(17):2332-3	MetaGeneAlyse: analysis of integrated transcriptional and metabolite data.	http://metagenealyse.mpimp-golm.mpg.de/	http://metagenealyse.mpimp-golm.mpg.de/	NA	1	2017:2:7:11:30:47	200	OK
14631655	2003	DNA Seq	NA	NA	Europe	NA	10.1080/1042517031000135124	14(4):327-30	The DNA sequence quality machine at IFOM: a simple Web-based tool for quantitative assessment of sequencing reactions.	http://bio.ifom-firc.it/Phred20/index.html	http://www.nhgri.nih.gov/Grant_info/Funding/ Statement:	NA	0	2017:2:7:11:30:48	404	Not Found
14642759	2003	Comput Biol Chem	1.014	28	Europe	NA	10.1016/j.compbiolchem.2003.09.002	27(4-5):511-9	The PRALINE online server: optimising progressive multiple alignment on the web.	http://www.ibi.vu.nl/programs/pralinewww/	http://ibium.cs.vu.nl/programs/pralinewww/), an iterat:	http://www.ibi.vu.nl/programs/pralinewww/	1	2017:2:7:11:30:48	200	OK
14668240	2003	Bioinformatics	5.766	26	Europe	NA	10.1093/bioinformatics/btg350	19(18):2486-8	PRIMEX: rapid identification of oligonucleotide matches in whole genomes.	http://bioinformatics.cribi.unipd.it/primex	http://bioinformatics.cribi.unipd.it/primex	NA	0	2017:2:7:11:30:48	404	Not Found
14668246	2003	Bioinformatics	5.766	285	North Am	NA	10.1093/bioinformatics/btg362	19(18):2500-1	ModLoop: automated modeling of loops in protein structures.	http://salilab.org/modloop	http://salilab.org/modloop	NA	1	2017:2:7:11:30:48	200	OK
14676318	2003	Proc Natl Acad Sci U S A	NA	70	Europe	PMC307563	10.1073/pnas.2536430100	100(26):15310-5	Prediction and statistics of pseudoknots in RNA structures using exactly clustered stochastic simulations.	http://kinefold.u-strasbg.fr	http://kinefold.u-strasbg.fr).	NA	0	2017:2:7:11:30:50	500	Can't connect to kinefold.u-strasbg.fr:80
14678565	2003	BMC Bioinformatics	2.435	20	North Am	PMC328086	10.1186/1471-2105-4-63	0.210417	AnaBench: a Web/CORBA-based workbench for biomolecular sequence analysis.	http://malawimonas.bcm.umontreal.ca:8091/anabench	http://malawimonas.bcm.umontreal.ca::8091/anabench. Please co:	NA	0	2017:2:7:11:30:50	500	Can't connect to malawimonas.bcm.umontreal.ca:8091
14681352	2004	Nucleic Acids Res	9.202	59	Asia	PMC308861	10.1093/nar/gkh127	32(Database issue):D31-4	DDBJ in the stream of various biological data.	http://www.ddbj.nig.ac.jp/	http://www.ddbj.nig. ac.jp) ha:	NA	1	2017:2:7:11:30:50	200	OK
14681354	2004	Nucleic Acids Res	9.202	378	Europe	PMC308826	10.1093/nar/gkh092	32(Database issue):D41-4	MIPS: analysis and annotation of proteins from whole genomes.	http://mips.gsf.de	http://mips.gsf.de).	NA	1	2017:2:7:11:30:53	200	OK
14681364	2004	Nucleic Acids Res	9.202	75	Europe	PMC308856	10.1093/nar/gkh122	32(Database issue):D82-5	The Eukaryotic Promoter Database EPD: the impact of in silico primer extension.	http://www.epd.isb-sib.ch/	http://www.epd. isb-sib.c:	NA	0	2017:2:7:11:30:54	500	read timeout
14681369	2004	Nucleic Acids Res	9.202	76	North Am	PMC308836	10.1093/nar/gkh102	32(Database issue):D104-8	The tmRNA website: reductive evolution of tmRNA in plastids and other endosymbionts.	http://www.indiana.edu/~tmrna	http://www.indiana.edu/~ tmrna), a:	NA	1	2017:2:7:11:31:14	200	OK
14681392	2004	Nucleic Acids Res	9.202	NA	NA	PMC308781	10.1093/nar/gkh047	32(Database issue):D193-5	DomIns: a web resource for domain insertions in known protein structures.	http://www.domins.org/index.html	http://stash.mrc-lmb.cam. ac.uk/Dom:	http://www.domins.org/indeNA.html	1	2017:2:7:11:31:15	200	OK
14681401	2004	Nucleic Acids Res	9.202	229	Europe	PMC308743	10.1093/nar/gkh008	32(Database issue):D230-4	The SWISS-MODEL Repository of annotated three-dimensional protein structure homology models.	https://swissmodel.expasy.org/repository/	http://swissmodel.expasy. org/repos:	https://swissmodel.eNApasy.org/repository/	1	2017:2:7:11:31:16	200	OK
14681411	2004	Nucleic Acids Res	9.202	49	Europe	PMC308787	10.1093/nar/gkh053	32(Database issue):D273-6	FusionDB: a database for in-depth analysis of prokaryotic gene fusion events.	http://igs-server.cnrs-mrs.fr/FusionDB/	http://igs-server.cnrs-mrs.fr/FusionDB/) constitut:	NA	0	2017:2:7:11:31:16	500	Can't connect to igs-server.cnrs-mrs.fr:80
14681479	2004	Nucleic Acids Res	9.202	289	Europe	PMC308763	10.1093/nar/gkh029	32(Database issue):D552-6	GenePaint.org: an atlas of gene expression patterns in the mouse embryo.	http://www.genepaint.org	http://www.genepaint.org. This rela:	NA	1	2017:2:7:11:31:16	200	OK
14681532	2003	Plant Physiol	6.28	115	Europe	PMC300724	10.1104/pp.103.023580	133(4):1691-701	Glycosylphosphatidylinositol lipid anchoring of plant proteins. Sensitive prediction from sequence- and genome-wide studies for Arabidopsis and rice.	http://mendel.imp.univie.ac.at/gpi/plants/gpi_plants.html	http://mendel.imp.univie.ac.at/gpi/plants/gpi_plants.html. Arabidops:	NA	1	2017:2:7:11:31:16	200	OK
14693807	2004	Bioinformatics	5.766	435	North Am	NA	10.1093/bioinformatics/btg371	20(1):45-50	ClusPro: an automated docking and discrimination method for the prediction of protein complexes.	https://cluspro.bu.edu/login.php	http://structure.bu.edu	https://cluspro.bu.edu/login.php	1	2017:2:7:11:31:16	200	OK
14693811	2004	Bioinformatics	5.766	14	Asia	NA	10.1093/bioinformatics/btg375	20(1):75-7	MedBlast: searching articles related to a biological sequence.	http://medblast.sibsnet.org	http://medblast.sibsnet.org	NA	0	2017:2:7:11:31:17	500	read timeout
14693825	2004	Bioinformatics	5.766	60	Europe	NA	10.1093/bioinformatics/btg394	20(1):136-7	TM or not TM: transmembrane protein prediction with low false positive rate using DAS-TMfilter.	http://mendel.imp.univie.ac.at/sat/DAS/DAS.html	http://mendel.imp.univie.ac.at/sat/DAS/DAS.html, http://wo:	NA	1	2017:2:7:11:31:37	200	OK
14708578	2003	J Mol Evol	1.847	23	Europe	NA	10.1007/s00239-003-2499-1	57(4):453-66	A survey of codon and amino acid frequency bias in microbial genomes focusing on translational efficiency.	www.g21.bio.uni-goettingen.de	www.g21.bio.uni-goettingen.de. The metho	NA	0	2017:2:7:11:31:37	500	Can't connect to www.g21.bio.uni-goettingen.de:80
14715091	2004	BMC Bioinformatics	2.435	22	North Am	PMC344530	10.1186/1471-2105-5-2	05:02:00	Using 3D Hidden Markov Models that explicitly represent spatial coordinates to model and compare protein structures.	http://www.molmovdb.org/geometry/3dHMM	http://www.molmovdb.org/geometry/3dHMM, and at th:	NA	1	2017:2:7:11:31:37	200	OK
14734323	2004	Bioinformatics	5.766	60	North Am	NA	10.1093/bioinformatics/btg406	20(2):279-81	JDotter: a Java interface to multiple dotplots generated by dotter.	http://athena.bioc.uvic.ca/pbr/jdotter/	http://athena.bioc.uvic.ca/pbr/jdotter/. The softw	NA	0	2017:2:7:11:31:38	403	Forbidden
14734324	2004	Bioinformatics	5.766	11	North Am	NA	10.1093/bioinformatics/btg407	20(2):282-3	FGDP: functional genomics data pipeline for automated, multiple microarray data analyses.	http://bioinformatics.fccc.edu/	http://bioinformatics.fccc.edu/	NA	1	2017:2:7:11:31:40	200	OK
14736340	2004	BMC Bioinformatics	2.435	151	Europe	PMC341448	10.1186/1471-2105-5-7	05:07:00	HMM Logos for visualization of protein families.	http://logos.molgen.mpg.de	http://logos.molgen.mpg.de. CONCLUSIO:	NA	1	2017:2:7:11:31:41	200	OK
14739324	2004	Protein Sci	3.039	81	North Am	PMC2286705	10.1110/ps.03411904	13(2):391-9	Accurate and efficient loop selections by the DFIRE-based all-atom statistical potential.	http://theory.med.buffalo.edu/	http://theory.med.buffalo.edu/.	NA	0	2017:2:7:11:31:41	500	read timeout
14751976	2004	Bioinformatics	5.766	7	Europe	NA	10.1093/bioinformatics/bth014	20(5):805-7	ClusterControl: a web interface for distributing and monitoring bioinformatics applications on a Linux cluster.	http://genome.tugraz.at/Software/ClusterControl	http://genome.tugraz.at/Software/ClusterControl	NA	1	2017:2:7:11:32:1	200	OK
14751988	2004	Bioinformatics	5.766	10	North Am	NA	10.1093/bioinformatics/btg476	20(5):727-34	Java-based application framework for visualization of gene regulatory region annotations.	http://bioinformatics.med.ohio-state.edu/GDVTK	http://bioinformatics.med.ohio-state.edu/GDVTK.	NA	0	2017:2:7:11:32:1	500	read timeout
14764557	2004	Bioinformatics	5.766	62	North Am	NA	10.1093/bioinformatics/bth058	20(7):1157-69	Gene structure prediction from consensus spliced alignment of multiple ESTs matching the same genomic locus.	http://bioinformatics.iastate.edu/bioinformatics2go/gs/download.html	http://bioinformatics.iastate.edu/bioinformatics2go/gs/download.html. Web serve:	NA	0	2017:2:7:11:32:21	404	Not Found
14871863	2004	Bioinformatics	5.766	1	Europe	NA	10.1093/bioinformatics/bth076	20(8):1331-3	WebVar: A resource for the rapid estimation of relative site variability from multiple sequence alignments.	http://www.pesolelab.it/Tools/WebVar.html	http://www.pesolelab.it/Tools/WebVar.html	NA	0	2017:2:7:11:32:23	404	Not Found
14871869	2004	Bioinformatics	5.766	233	Asia	NA	10.1093/bioinformatics/bth070	20(8):1322-4	ConSeq: the identification of functionally and structurally important residues in protein sequences.	http://consurf.tau.ac.il/2016/	http://conseq.bioinfo.tau.ac.il/ SUPPLEMEN:	http://consurf.tau.ac.il/2016/	1	2017:2:7:11:32:24	200	OK
14962915	2004	Bioinformatics	5.766	13	Europe	NA	10.1093/bioinformatics/bth117	20(10):1641-3	VARAN: a web server for variability analysis of DNA microarray experiments.	http://www.bionet.espci.fr/varan/help.html	http://www.bionet.espci.fr/varan/help.html	NA	0	2017:2:7:11:32:24	500	Can't connect to www.bionet.espci.fr:80
14962932	2004	Bioinformatics	5.766	58	North Am	NA	10.1093/bioinformatics/bth086	20(9):1335-60	Automatic prediction of protein domains from sequence information using a hybrid learning system.	http://biozon.org/tools/domains/	http://biozon.org/tools/domains/	NA	1	2017:2:7:11:32:24	200	OK
14962939	2004	Bioinformatics	5.766	2	North Am	NA	10.1093/bioinformatics/bth094	20(9):1468-9	Site2genome: locating short DNA sequences in whole genomes.	http://zlab.bu.edu/site2genome/	http://zlab.bu.edu/site2genome/	NA	0	2017:2:7:11:32:25	500	Can't connect to zlab.bu.edu:443 (certificate verify failed)
14976032	2004	Bioinformatics	5.766	91	Asia	NA	10.1093/bioinformatics/bth103	20(9):1405-12	Spectral Repeat Finder (SRF): identification of repetitive sequences using Fourier transformation.	http://www.imtech.res.in/raghava/srf/	http://www2.imtech.res.in/raghava/srf	http://www.imtech.res.in/raghava/srf/	1	2017:2:7:11:32:25	200	OK
14978719	2004	J Comput Chem	3.648	64	Asia	NA	10.1002/jcc.10386	25(5):762-7	Neural network-based prediction of transmembrane beta-strand segments in outer membrane proteins.	http://psfs.cbrc.jp/tmbeta-net/	http://psfs.cbrc.jp/tmbeta-net/.	NA	0	2017:2:7:11:32:27	502	Bad Gateway
14988101	2004	Bioinformatics	5.766	162	Asia	NA	10.1093/bioinformatics/bth149	20(12):1842-9	Haplotype reconstruction from genotype data using Imperfect Phylogeny.	http://www.calit2.net/index.php	http://www.calit2.net/compbio/hap/	http://www.calit2.net/indeNA.php	1	2017:2:7:11:32:28	200	OK
14988105	2004	Bioinformatics	5.766	33	North Am	NA	10.1093/bioinformatics/bth153	20(12):1850-60	Multiple-sequence functional annotation and the generalized hidden Markov phylogeny.	http://bonaire.lbl.gov/shadower	http://bonaire.lbl.gov/shadower	NA	0	2017:2:7:11:32:29	500	Can't connect to bonaire.lbl.gov:80
14988128	2004	Bioinformatics	5.766	57	North Am	NA	10.1093/bioinformatics/bth143	20(12):1822-35	A knowledge-based scale for the analysis and prediction of buried and exposed faces of transmembrane domain proteins.	http://icb.med.cornell.edu/services/propertm/start	http://icb.med.cornell.edu/services/propertm/start).	NA	0	2017:2:7:11:32:29	404	Not Found
14992519	2004	Pac Symp Biocomput	NA	18	Asia	NA	NA	NA	Protein structure and fold prediction using tree-augmented naive Bayesian classifier.	http://www-appn.comp.nus.edu.sg/-bioinfo/bayesprot/Default.htm	NA	NA	0	2017:2:7:11:32:30	503	Service Unavailable
14997542	2004	Proteins	2.499	39	Asia	NA	10.1002/prot.10569	55(1):83-90	Prediction of alpha-turns in proteins using PSI-BLAST profiles and secondary structure information.	http://www.imtech.res.in/raghava/alphapred/	http://www.imtech.res.in/raghava/alphapred/) has been	NA	1	2017:2:7:11:32:31	200	OK
14997569	2004	Proteins	2.499	116	Asia	NA	10.1002/prot.10634	54(4):738-43	A novel method for protein secondary structure prediction using dual-layer SVM and profiles.	http://www.bioinfo.tsinghua.edu.cn/pmsvm	http://www.bioinfo.tsinghua.edu.cn/pmsvm.	NA	0	2017:2:7:11:32:31	500	Can't connect to www.bioinfo.tsinghua.edu.cn:80
15021986	2004	Virchows Arch	2.613	28	Europe	NA	10.1007/s00428-004-0980-x	444(5):403-9	Diagnostic telepathology: long-term experience of a single institution.	http://teleteach.patho.unibas.ch	http://teleteach.patho.unibas.ch). CONCLUSIO:	NA	1	2017:2:7:11:32:32	200	OK
15037510	2004	Bioinformatics	5.766	13	Europe	NA	10.1093/bioinformatics/bth22510.1093/bioinformatics/bth172	20(12):1968-70	BLAST2GENE: a comprehensive conversion of BLAST output into independent genes and gene fragments.	http://www.bork.embl.de/blast2gene	http://www.bork.embl.de/blast2gene	NA	1	2017:2:7:11:32:32	200	OK
15044227	2004	Bioinformatics	5.766	369	Europe	NA	10.1093/bioinformatics/bth195	20(13):2138-9	The DISOPRED server for the prediction of protein disorder.	http://bioinf.cs.ucl.ac.uk/disopred/	http://bioinf.cs.ucl.ac.uk/disopred/	NA	1	2017:2:7:11:32:32	200	OK
15059813	2004	Bioinformatics	5.766	19	Europe	NA	10.1093/bioinformatics/bth241	20(14):2331-2	AliasServer: a web server to handle multiple aliases used to refer to proteins.	http://cbi.labri.fr/outils/alias/asdoc.pdf	http://cbi.labri.fr/outils/alias/asdoc.pdf	NA	0	2017:2:7:11:32:39	500	Can't connect to www.cbib.u-bordeaux.fr:443 (certificate verify failed)
15059818	2004	Bioinformatics	5.766	30	Europe	NA	10.1093/bioinformatics/bth232	20(14):2228-35	Arby: automatic protein structure prediction using profile-profile alignment and confidence measures.	http://www.hnbioinfo.de	http://www.hnbioinfo.de under the:	NA	1	2017:2:7:11:32:40	200	OK
15059832	2004	Bioinformatics	5.766	32	North Am	NA	10.1093/bioinformatics/bth207	20(13):2084-91	Gene annotation from scientific literature using mappings between keyword systems.	http://www.bork.embl.de/kat	http://www.bork.embl.de/kat	NA	0	2017:2:7:11:32:40	503	Service Unavailable
15059833	2004	Bioinformatics	5.766	7	Asia	NA	10.1093/bioinformatics/bth208	20(13):2150-2	F2CS: FSSP to CATH and SCOP prediction server.	http://www.weizmann.ac.il/physics/complex/compphys/f2cs/	http://www.weizmann.ac.il/physics/complex/compphys/f2cs/ SUPPLEMEN:	NA	0	2017:2:7:11:32:44	302	Found
15059840	2004	Bioinformatics	5.766	23	Asia	NA	10.1093/bioinformatics/bth220	20(14):2309-11	MuSiC: a tool for multiple sequence alignment with constraints.	http://genome.life.nctu.edu.tw/MUSIC	http://genome.life.nctu.edu.tw/MUSIC	NA	0	2017:2:7:11:32:46	503	Service Unavailable
15071328	2004	J Thorac Imaging	NA	35	North Am	NA	10.1097/00005382-200404000-00008	19(2):103-8	Casimage project: a digital teaching files authoring environment.	http://mirc.rsna.org	http://mirc.rsna.org) to easily:	NA	1	2017:2:7:11:32:50	200	OK
15072998	2004	Bioinformatics	5.766	184	Africa	NA	10.1093/bioinformatics/bth200	20(13):2143-4	Web-based kinetic modelling using JWS Online.	http://jjj.biochem.sun.ac.za/	http://jjj.biochem.sun.ac.za/ with mirr:	NA	1	2017:2:7:11:32:50	200	OK
15073007	2004	Bioinformatics	5.766	20	North Am	NA	10.1093/bioinformatics/bth256	20(15):2390-8	GEPIS--quantitative gene expression profiling in normal and cancer tissues.	http://www.cgl.ucsf.edu/Research/genentech/gepis/	http://www.cgl.ucsf.edu/Research/genentech/gepis/. The sourc:	NA	1	2017:2:7:11:32:53	200	OK
15073008	2004	Bioinformatics	5.766	17	North Am	NA	10.1093/bioinformatics/bth257	20(15):2399-400	PUNS: transcriptomic- and genomic-in silico PCR for enhanced primer design.	http://okeylabimac.med.utoronto.ca/PUNS	http://okeylabimac.med.utoronto.ca/PUNS.	NA	0	2017:2:7:11:32:54	403	Forbidden
15073011	2004	Bioinformatics	5.766	3	Europe	NA	10.1093/bioinformatics/bth262	20(15):2482-4	The PDB-Preview database: a repository of in-silico models of 'on-hold' PDB entries.	http://bioinfo.pl/PDB-Preview/	http://bioinfo.pl/PDB-Preview/.	NA	0	2017:2:7:11:32:54	404	Not Found
15073015	2004	Bioinformatics	5.766	1172	North Am	NA	10.1093/bioinformatics/bth226	20(14):2317-9	Bellerophon: a program to detect chimeric sequences in multiple sequence alignments.	http://foo.maths.uq.edu.au/~huber/bellerophon.pl	http://foo.maths.uq.edu.au/~huber/bellerophon.pl	NA	0	2017:2:7:11:32:55	500	read timeout
15073017	2004	Bioinformatics	5.766	138	Europe	NA	10.1093/bioinformatics/bth229	20(14):2222-7	Alignment of RNA base pairing probability matrices.	http://rna.tbi.univie.ac.at/cgi-bin/pmcgi.pl	http://rna.tbi.univie.ac.at/cgi-bin/pmcgi.pl	NA	0	2017:2:7:11:33:15	404	Not Found
15073023	2004	Bioinformatics	5.766	66	North Am	NA	10.1093/bioinformatics/bth248	20(15):2460-2	POLYVIEW: a flexible visualization tool for structural and functional annotations of proteins.	http://polyview.cchmc.org	http://polyview.cchmc.org.	NA	1	2017:2:7:11:33:15	200	OK
15087318	2004	Bioinformatics	5.766	15	Europe	NA	10.1093/bioinformatics/bth260	20(15):2476-8	The SRS 3D module: integrating structures, sequences and features.	http://srs3d.ebi.ac.uk/	http://srs3d.ebi.ac.uk/.	NA	0	2017:2:7:11:33:16	500	Can't connect to srs3d.ebi.ac.uk:80
15094837	2004	Acta Biochim Pol	1.187	10	Europe	NA	45101161	51(1):161-72	Comparison of proteins based on segments structural similarity.	http://3dhit.bioinfo.pl/	http://3dhit.bioinfo.pl/ free for	NA	0	2017:2:7:11:33:16	500	Can't connect to 3dhit.bioinfo.pl:80
15096685	2004	Technol Health Care	0.678	12	Europe	NA	NA	12(1):33-41	A first look at HealthCyberMap medical semantic subject search engine.	http://healthcybermap.semanticweb.org	http://healthcybermap.semanticweb.org) is a Sema:	NA	1	2017:2:7:11:33:16	200	OK
15107018	2004	In Silico Biol	NA	17	Europe	NA	NA	4(2):127-31	waveTM: wavelet-based transmembrane segment prediction.	http://bioinformatics.biol.uoa.gr/waveTM	http://bioinformatics.biol.uoa.gr/waveTM.	NA	1	2017:2:7:11:33:16	200	OK
15108278	2004	Hum Mutat	5.089	98	Europe	NA	10.1002/humu.20021	23(5):464-70	The Swiss-Prot variant page and the ModSNP database: a resource for sequence and structure information on human protein variants.	www.expasy.org/	www.expasy.org/), via a hyp	NA	1	2017:2:7:11:33:16	200	OK
15123593	2004	Genome Res	11.351	35	Europe	PMC479127	10.1101/gr.1864804	14(5):963-70	The otter annotation system.	http://vega.sanger.ac.uk	http://vega.sanger.ac.uk), which pro:	NA	1	2017:2:7:11:33:17	200	OK
15130924	2004	Bioinformatics	5.766	52	North Am	NA	10.1093/bioinformatics/bth304	20(9):1477-9	WebSIDD: server for predicting stress-induced duplex destabilized (SIDD) sites in superhelical DNA.	http://orange.genomecenter.ucdavis.edu/benham/sidd/index.html	http://orange.genomecenter.ucdavis.edu/benham/sidd/index.html	NA	0	2017:2:7:11:33:17	500	Can't connect to orange.genomecenter.ucdavis.edu:80
15132760	2004	BMC Bioinformatics	2.435	1	Europe	PMC416658	10.1186/1471-2105-5-55	05:55:00	eL-DASionator: an LDAS upload file generator.	http://atgc.lirmm.fr/eldasionator.html	http://atgc.lirmm.fr/eldasionator.html. Users can	NA	0	2017:2:7:11:33:17	404	Not Found
15141032	2004	Nucleic Acids Res	9.202	NA	NA	PMC419461	10.1093/nar/gkh573	32(8):2618-22	A Fugu-Human Genome Synteny Viewer: web software for graphical display and annotation reports of synteny between Fugu genomic sequence and human genes.	http://fugu.rfcgr.mrc.ac.uk/	http://fugu.rfcgr.mrc.ac.uk/).	NA	0	2017:2:7:11:33:17	500	Can't connect to fugu.rfcgr.mrc.ac.uk:80
15145798	2004	Bioinformatics	5.766	80	Asia	NA	10.1093/bioinformatics/bth322	20(16):2751-8	A neural network method for prediction of beta-turn types in proteins using evolutionary information.	http://bioinformatics.uams.edu/mirror/betaturns/	http://bioinformatics.uams.edu/mirror/betaturns/ (mirror s:	NA	0	2017:2:7:11:33:18	500	read timeout
15146497	2004	Proteins	2.499	138	North Am	NA	10.1002/prot.20007	55(4):1005-13	Single-body residue-level knowledge-based energy score combined with sequence-profile and secondary structure information for fold recognition.	http://theory.med.buffalo.edu	http://theory.med.buffalo.edu.	NA	0	2017:2:7:11:33:38	500	read timeout
15162482	2004	Proteins	2.499	72	Asia	NA	10.1002/prot.20092	56(1):11-8	Prediction of transmembrane regions of beta-barrel proteins using ANN- and SVM-based methods.	http://www.imtech.res.in/raghava/tbbpred	http://www.imtech.res.in/raghava/tbbpred).	NA	1	2017:2:7:11:33:58	200	OK
15162489	2004	Proteins	2.499	118	North Am	NA	10.1002/prot.20019	56(1):93-101	A physical reference state unifies the structure-derived potential of mean force for protein folding and binding.	http://theory.med.buffalo.edu	http://theory.med.buffalo.edu.	NA	0	2017:2:7:11:33:59	500	read timeout
15174133	2004	Proteomics	4.079	830	Europe	NA	10.1002/pmic.200300771	4(6):1633-49	Prediction of post-translational glycosylation and phosphorylation of proteins from the amino acid sequence.	http://www.cbs.dtu.dk/services/NetPhosK/	http://www.cbs.dtu.dk/services/NetPhosK/. The issue:	NA	1	2017:2:7:11:34:19	200	OK
15175116	2004	BMC Bioinformatics	2.435	37	Asia	PMC434494	10.1186/1471-2105-5-67	0.254861	Genome SEGE: a database for 'intronless' genes in eukaryotic genomes.	http://sege.ntu.edu.sg/wester/intronless	http://sege.ntu.edu.sg/wester/intronless DESCRIPTI:	NA	0	2017:2:7:11:34:19	500	Can't connect to sege.ntu.edu.sg:80
15203847	2004	Med Teach	2.355	25	Europe	NA	10.1080/01421590410001679028	26(4):336-42	Web-based, virtual course units as a didactic concept for medical teaching.	http://giga.rrze.uni-erlangen.de/movies/MKG/demo/index	http://giga.rrze.uni-erlangen.de/movies/MKG/demo/index. Some 89%	NA	0	2017:2:7:11:34:19	500	Can't connect to giga.rrze.uni-erlangen.de:80
15204612	2004	Med Inform Internet Med	NA	NA	Oceania	NA	10.1080/14639230410001662660	29(1):75-85	An online tool for investigating clinical decision making.	http://csrs2.aut.ac.nz/scenario	http://csrs2.aut.ac.nz/scenario	NA	0	2017:2:7:11:34:19	500	read timeout
15215340	2004	Nucleic Acids Res	9.202	2	North Am	PMC441505	10.1093/nar/gkh367	32(Web Server issue):W10-5	The web server of IBM's Bioinformatics and Pattern Discovery group: 2004 update.	http://cbcsrv.watson.ibm.com/Annotations/	http://cbcsrv.watson.ibm.com/Annotations/.	NA	0	2017:2:7:11:34:39	500	Can't connect to cbcsrv.watson.ibm.com:80
15215341	2004	Nucleic Acids Res	9.202	15	Europe	PMC441591	10.1093/nar/gkh453	32(Web Server issue):W16-9	PubCrawler: keeping up comfortably with PubMed and GenBank.	http://www.pubcrawler.ie	http://www.pubcrawler.ie) has been	NA	1	2017:2:7:11:34:39	200	OK
15215344	2004	Nucleic Acids Res	9.202	176	Europe	PMC441511	10.1093/nar/gkh373	32(Web Server issue):W33-6	DIALIGN: multiple DNA and protein sequence alignment at BiBiServ.	http://bibiserv.TechFak.Uni-Bielefeld.DE/dialign/	http://bibiserv.TechFak.Uni-Bielefeld.DE/dialign/.	NA	1	2017:2:7:11:34:40	200	OK
15215345	2004	Nucleic Acids Res	9.202	126	Europe	PMC441520	10.1093/nar/gkh382	32(Web Server issue):W37-40	3DCoffee@igs: a web server for combining sequences and structures into a multiple sequence alignment.	http://igs-server.cnrs-mrs.fr/Tcoffee/	http://igs-server.cnrs-mrs.fr/Tcoffee/.	NA	0	2017:2:7:11:34:40	500	Can't connect to igs-server.cnrs-mrs.fr:80
15215346	2004	Nucleic Acids Res	9.202	45	Europe	PMC441499	10.1093/nar/gkh361	32(Web Server issue):W41-4	The CHAOS/DIALIGN WWW server for multiple alignment of genomic sequences.	http://dialign.gobics.de/chaos-dialign-submission	http://dialign.gobics.de/chaos-dialign-submission.	NA	1	2017:2:7:11:34:40	200	OK
15215348	2004	Nucleic Acids Res	9.202	3	Europe	PMC441496	10.1093/nar/gkh358	32(Web Server issue):W48-9	WAViS server for handling, visualization and presentation of multiple alignments of nucleotide or amino acids sequences.	http://wavis.img.cas.cz	http://wavis.img.cas.cz.	NA	1	2017:2:7:11:34:40	200	OK
15215349	2004	Nucleic Acids Res	9.202	10	North Am	PMC441594	10.1093/nar/gkh456	32(Web Server issue):W50-4	Consensus alignment server for reliable comparative modeling with distant templates.	http://structure.bu.edu/cgi-bin/consensus/consensus.cgi	http://structure.bu.edu/cgi-bin/consensus/consensus.cgi.	NA	0	2017:2:7:11:34:40	404	Not Found
15215354	2004	Nucleic Acids Res	9.202	4	Asia	PMC441575	10.1093/nar/gkh437	32(Web Server issue):W73-5	InterWeaver: interaction reports for discovering potential protein interaction partners with online evidence.	http://interweaver.i2r.a-star.edu.sg/	http://interweaver.i2r.a-star.edu.sg/.	NA	0	2017:2:7:11:34:41	500	Can't connect to interweaver.i2r.a-star.edu.sg:80
15215355	2004	Nucleic Acids Res	9.202	18	Asia	PMC441563	10.1093/nar/gkh425	32(Web Server issue):W76-82	ProteMiner-SSM: a web server for efficient analysis of similar protein tertiary substructures.	http://p4.sbl.bc.sinica.edu.tw/proteminer/	http://p4.sbl.bc.sinica.edu.tw/proteminer/.	NA	0	2017:2:7:11:34:41	500	Can't connect to p4.sbl.bc.sinica.edu.tw:80
15215358	2004	Nucleic Acids Res	9.202	301	North Am	PMC441492	10.1093/nar/gkh354	32(Web Server issue):W96-9	ClusPro: a fully automated algorithm for protein-protein docking.	http://nrc.bu.edu/cluster	http://nrc.bu.edu/cluster) represent:	NA	1	2017:2:7:11:34:51	200	OK
15215359	2004	Nucleic Acids Res	9.202	81	North Am	PMC441602	10.1093/nar/gkh464	32(Web Server issue):W100-3	CE-MC: a multiple protein structure alignment server.	http://cemc.sdsc.edu	http://cemc.sdsc.edu) provides	NA	0	2017:2:7:11:34:53	500	Can't connect to cemc.sdsc.edu:80
15215360	2004	Nucleic Acids Res	9.202	5	Asia	PMC441501	10.1093/nar/gkh363	32(Web Server issue):W104-7	Qgrid: clustering tool for detecting charged and hydrophobic regions in proteins.	http://www.netasa.org/qgrid/index.html	http://www.netasa.org/qgrid/index.html). For the c:	NA	0	2017:2:7:11:34:53	500	read timeout
15215361	2004	Nucleic Acids Res	9.202	30	North Am	PMC441588	10.1093/nar/gkh450	32(Web Server issue):W108-12	A web server for performing electronic PCR.	www.ncbi.nlm.nih.gov/sutils/e-pcr	www.ncbi.nlm.nih.gov/sutils/e-pcr.	NA	1	2017:2:7:11:35:13	200	OK
15215365	2004	Nucleic Acids Res	9.202	208	North Am	PMC441504	10.1093/nar/gkh366	32(Web Server issue):W130-4	siRNA Selection Server: an automated siRNA oligonucleotide prediction server.	http://jura.wi.mit.edu/bioc/siRNA	http://jura.wi.mit.edu/bioc/siRNA) automates:	NA	1	2017:2:7:11:35:14	200	OK
15215366	2004	Nucleic Acids Res	9.202	263	North Am	PMC441587	10.1093/nar/gkh449	32(Web Server issue):W135-41	Sfold web server for statistical folding and rational design of nucleic acids.	http://www.bioinfo.rpi.edu/applications/sfold	http://www.bioinfo.rpi.edu/applications/sfold.	NA	0	2017:2:7:11:35:15	404	Not Found
15215367	2004	Nucleic Acids Res	9.202	49	Europe	PMC441553	10.1093/nar/gkh415	32(Web Server issue):W142-5	CARNAC: folding families of related RNAs.	http://bioinfo.lifl.fr/carnac	http://bioinfo.lifl.fr/carnac.	NA	1	2017:2:7:11:35:15	200	OK
15215368	2004	Nucleic Acids Res	9.202	22	North Am	PMC441582	10.1093/nar/gkh444	32(Web Server issue):W146-9	ILM: a web server for predicting RNA secondary structures with pseudoknots.	http://cic.cs.wustl.edu/RNA/index.htm.bak	http://cic.cs.wustl.edu/RNA/.	http://cic.cs.wustl.edu/RNA/indeNA.htm.bak	1	2017:2:7:11:35:16	200	OK
15215369	2004	Nucleic Acids Res	9.202	10	Asia	PMC441583	10.1093/nar/gkh445	32(Web Server issue):W150-3	RDfolder: a web server for prediction of RNA secondary structure.	http://rna.cbi.pku.edu.cn	http://rna.cbi.pku.edu.cn.	NA	1	2017:2:7:11:35:16	200	OK
15215370	2004	Nucleic Acids Res	9.202	47	Europe	PMC441490	10.1093/nar/gkh352	32(Web Server issue):W154-9	Riboswitch finder--a tool for identification of riboswitch RNAs.	http://www.biozentrum.uni-wuerzburg.de/bioinformatik/Riboswitch/	http://www.biozentrum.uni-wuerzburg.de/bioinformatik/Riboswitch/.	NA	0	2017:2:7:11:35:17	404	Not Found
15215371	2004	Nucleic Acids Res	9.202	30	Europe	PMC441556	10.1093/nar/gkh418	32(Web Server issue):W160-5	The ERPIN server: an interface to profile-based RNA motif identification.	http://tagc.univ-mrs.fr/erpin/	http://tagc.univ-mrs.fr/erpin/). This web	NA	0	2017:2:7:11:35:18	500	read timeout
15215372	2004	Nucleic Acids Res	9.202	11	Europe	PMC441566	10.1093/nar/gkh428	32(Web Server issue):W166-9	PDA: a pipeline to explore and estimate polymorphism in large DNA databases.	http://pda.uab.es/	http://pda.uab.es/.	NA	1	2017:2:7:11:35:38	200	OK
15215373	2004	Nucleic Acids Res	9.202	20	Europe	PMC441507	10.1093/nar/gkh369	32(Web Server issue):W170-2	SNPbox: web-based high-throughput primer design from gene to genome.	http://www.SNPbox.org	http://www.SNPbox.org, which hos:	NA	0	2017:2:7:11:35:38	500	Can't connect to www.SNPbox.org:80
15215374	2004	Nucleic Acids Res	9.202	29	North Am	PMC441562	10.1093/nar/gkh424	32(Web Server issue):W173-5	The sequencing-based typing tool of dbMHC: typing highly polymorphic gene sequences.	http://www.ncbi.nlm.nih.gov/mhc/sbt.cgi?cmd=main	http://www.ncbi.nlm.nih.gov/mhc/sbt.cgi?cmd=main) at the Na:	NA	1	2017:2:7:11:35:38	200	OK
15215379	2004	Nucleic Acids Res	9.202	45	North Am	PMC441525	10.1093/nar/gkh387	32(Web Server issue):W195-8	MSCAN: identification of functional clusters of transcription factor binding sites.	http://www.cisreg.ca/cgi-bin/mscan/MSCAN	http://mscan.cgb.ki.se/cgi-bin/MSCAN.	http://www.cisreg.ca/cgi-bin/mscan/MSCAN	1	2017:2:7:11:35:39	200	OK
15215384	2004	Nucleic Acids Res	9.202	273	North Am	PMC441521	10.1093/nar/gkh383	32(Web Server issue):W217-21	rVISTA 2.0: evolutionary analysis of transcription factor binding sites.	http://rvista.dcode.org/	http://rvista.dcode.org/.	NA	1	2017:2:7:11:35:41	200	OK
15215390	2004	Nucleic Acids Res	9.202	41	North Am	PMC441523	10.1093/nar/gkh385	32(Web Server issue):W253-6	CREME: Cis-Regulatory Module Explorer for the human genome.	https://dire.dcode.org/	http://creme.dcode.org.	https://dire.dcode.org/	1	2017:2:7:11:35:42	200	OK
15215394	2004	Nucleic Acids Res	9.202	711	North Am	PMC441596	10.1093/nar/gkh458	32(Web Server issue):W273-9	VISTA: computational tools for comparative genomics.	http://www-gsd.lbl.gov/vista/	http://www-gsd.lbl.gov/vista/ was launc:	NA	1	2017:2:7:11:35:42	200	OK
15215397	2004	Nucleic Acids Res	9.202	53	Europe	PMC441570	10.1093/nar/gkh432	32(Web Server issue):W293-300	GFINDer: Genome Function INtegrated Discoverer through dynamic annotation, statistical analysis, and mining.	http://www.medinfopoli.polimi.it/GFINDer/	http://www.medinfopoli.polimi.it/GFINDer/.	NA	0	2017:2:7:11:35:44	500	read timeout
15215398	2004	Nucleic Acids Res	9.202	8	Europe	PMC441616	10.1093/nar/gkh478	32(Web Server issue):W301-4	e2g: an interactive web-based server for efficiently mapping large EST and cDNA sets to genomic sequences.	http://bibiserv.techfak.uni-bielefeld.de/e2g/	http://bibiserv.techfak.uni-bielefeld.de/e2g/.	NA	1	2017:2:7:11:36:4	200	OK
15215399	2004	Nucleic Acids Res	9.202	11	Europe	PMC441524	10.1093/nar/gkh386	32(Web Server issue):W305-8	AGenDA: gene prediction by cross-species sequence comparison.	http://bibiserv.TechFak.Uni-Bielefeld.DE/agenda/	http://bibiserv.TechFak.Uni-Bielefeld.DE/agenda/.	NA	1	2017:2:7:11:36:4	200	OK
15215400	2004	Nucleic Acids Res	9.202	202	Europe	PMC441517	10.1093/nar/gkh379	32(Web Server issue):W309-12	AUGUSTUS: a web server for gene finding in eukaryotes.	http://augustus.gobics.de	http://augustus.gobics.de.	NA	1	2017:2:7:11:36:4	200	OK
15215401	2004	Nucleic Acids Res	9.202	67	Europe	PMC441544	10.1093/nar/gkh406	32(Web Server issue):W313-7	GOblet: a platform for Gene Ontology annotation of anonymous sequence data.	http://goblet.molgen.mpg.de	http://goblet.molgen.mpg.de.	NA	1	2017:2:7:11:36:4	200	OK
15215402	2004	Nucleic Acids Res	9.202	36	Asia	PMC441502	10.1093/nar/gkh364	32(Web Server issue):W318-20	PredictRegulon: a web server for the prediction of the regulatory protein binding sites and operons in prokaryote genomes.	http://www.cdfd.org.in/predictregulon/	http://www.cdfd.org.in/predictregulon/.	NA	0	2017:2:7:11:36:4	503	Service Unavailable
15215403	2004	Nucleic Acids Res	9.202	971	North Am	PMC441515	10.1093/nar/gkh377	32(Web Server issue):W321-6	The PredictProtein server.	http://www.predictprotein.org	http://www.predictprotein.org) is an Int:	NA	1	2017:2:7:11:36:5	200	OK
15215405	2004	Nucleic Acids Res	9.202	69	Europe	PMC441617	10.1093/nar/gkh479	32(Web Server issue):W332-5	MyHits: a new interactive resource for protein annotation and domain identification.	http://myhits.isb-sib.ch	http://myhits.isb-sib.ch) is a new	NA	1	2017:2:7:11:36:5	200	OK
15215406	2004	Nucleic Acids Res	9.202	19	Europe	PMC441503	10.1093/nar/gkh365	32(Web Server issue):W336-9	Phydbac2: improved inference of gene function using interactive phylogenomic profiling and chromosomal location analysis.	http://igs-server.cnrs-mrs.fr/phydbac/	http://igs-server.cnrs-mrs.fr/phydbac/.	NA	0	2017:2:7:11:36:6	500	Can't connect to igs-server.cnrs-mrs.fr:80
15215410	2004	Nucleic Acids Res	9.202	16	Oceania	PMC441532	10.1093/nar/gkh394	32(Web Server issue):W356-9	SDPMOD: an automated comparative modeling server for small disulfide-bonded proteins.	http://proline.bic.nus.edu.sg/sdpmod	http://proline.bic.nus.edu.sg/sdpmod.	NA	1	2017:2:7:11:36:6	200	OK
15215411	2004	Nucleic Acids Res	9.202	25	North Am	PMC441514	10.1093/nar/gkh376	32(Web Server issue):W360-4	GDAP: a web tool for genome-wide protein disulfide bond prediction.	http://www.doe-mbi.ucla.edu/Services/GDAP	http://www.doe-mbi.ucla.edu/Services/GDAP.	NA	0	2017:2:7:11:36:6	404	Not Found
15215413	2004	Nucleic Acids Res	9.202	61	North Am	PMC441512	10.1093/nar/gkh374	32(Web Server issue):W372-4	MITOPRED: a web server for the prediction of mitochondrial proteins.	http://mitopred.sdsc.edu	http://mitopred.sdsc.edu.	NA	0	2017:2:7:11:36:7	500	Can't connect to mitopred.sdsc.edu:80
15215415	2004	Nucleic Acids Res	9.202	45	Europe	PMC441569	10.1093/nar/gkh431	32(Web Server issue):W380-2	PRED-GPCR: GPCR recognition and family classification server.	http://bioinformatics.biol.uoa.gr/PRED-GPCR	http://bioinformatics.biol.uoa.gr/PRED-GPCR.	NA	1	2017:2:7:11:36:7	200	OK
15215416	2004	Nucleic Acids Res	9.202	126	Asia	PMC441554	10.1093/nar/gkh416	32(Web Server issue):W383-9	GPCRpred: an SVM-based method for prediction of families and subfamilies of G-protein coupled receptors.	http://www.imtech.res.in/raghava/gpcrpred/info.html	http://www.imtech.res.in/raghava/gpcrpred/info.html.	NA	1	2017:2:7:11:36:8	200	OK
15215417	2004	Nucleic Acids Res	9.202	172	Asia	PMC441518	10.1093/nar/gkh380	32(Web Server issue):W390-3	ConPred II: a consensus prediction method for obtaining transmembrane topology models with high reliability.	http://bioinfo.si.hirosaki-u.ac.jp/~ConPred2/	http://bioinfo.si.hirosaki-u.ac.jp/~ConPred2/) is a serv	NA	0	2017:2:7:11:36:8	500	Can't connect to bioinfo.si.hirosaki-u.ac.jp:80
15215419	2004	Nucleic Acids Res	9.202	208	Europe	PMC441555	10.1093/nar/gkh417	32(Web Server issue):W400-4	PRED-TMBB: a web server for predicting the topology of beta-barrel outer membrane proteins.	http://bioinformatics.biol.uoa.gr/PRED-TMBB	http://bioinformatics.biol.uoa.gr/PRED-TMBB) which is	NA	1	2017:2:7:11:36:18	200	OK
15215421	2004	Nucleic Acids Res	9.202	214	Asia	PMC441488	10.1093/nar/gkh350	32(Web Server issue):W414-9	ESLpred: SVM-based method for subcellular localization of eukaryotic proteins using dipeptide composition and PSI-BLAST.	http://www.imtech.res.in/raghava/eslpred/	http://www.imtech.res.in/raghava/eslpred/.	NA	1	2017:2:7:11:36:18	200	OK
15215422	2004	Nucleic Acids Res	9.202	29	North Am	PMC441564	10.1093/nar/gkh426	32(Web Server issue):W420-3	MotifViz: an analysis and visualization tool for motif discovery.	http://biowulf.bu.edu/MotifViz	http://biowulf.bu.edu/MotifViz.	NA	0	2017:2:7:11:36:19	500	Can't connect to biowulf.bu.edu:443 (certificate verify failed)
15215424	2004	Nucleic Acids Res	9.202	33	Europe	PMC441598	10.1093/nar/gkh460	32(Web Server issue):W429-34	The Iccare web server: an attempt to merge sequence and mapping information for plant and animal species.	http://genopole.toulouse.inra.fr/bioinfo/Iccare	http://genopole.toulouse.inra.fr/bioinfo/Iccare, provides	NA	0	2017:2:7:11:36:19	404	Not Found
15215426	2004	Nucleic Acids Res	9.202	12	North Am	PMC441535	10.1093/nar/gkh397	32(Web Server issue):W441-4	KARMA: a web server application for comparing and annotating heterogeneous microarray platforms.	http://ymd.med.yale.edu/karma/cgi-bin/karma.pl	http://ymd.med.yale.edu/karma/cgi-bin/karma.pl.	NA	0	2017:2:7:11:36:19	503	Service Unavailable
15215429	2004	Nucleic Acids Res	9.202	55	North Am	PMC441584	10.1093/nar/gkh446	32(Web Server issue):W457-9	ArrayPipe: a flexible processing pipeline for microarray data.	www.pathogenomics.ca/arraypipe	www.pathogenomics.ca/arraypipe) allows t	NA	1	2017:2:7:11:36:20	200	OK
15215436	2004	Nucleic Acids Res	9.202	332	Europe	PMC441567	10.1093/nar/gkh429	32(Web Server issue):W500-2	STRIDE: a web server for secondary structure assignment from known atomic coordinates of proteins.	http://webclu.bio.wzw.tum.de/stride/	http://webclu.bio.wzw.tum.de/stride/.	NA	1	2017:2:7:11:36:21	200	OK
15215437	2004	Nucleic Acids Res	9.202	22	Asia	PMC441551	10.1093/nar/gkh413	32(Web Server issue):W503-7	BioInfo3D: a suite of tools for structural bioinformatics.	http://www.mojapolska.org/	http://bioinfo3d.cs.tau.ac.il.	http://www.mojapolska.org/	0	2017:2:7:11:36:21	401	Unauthorized
15215438	2004	Nucleic Acids Res	9.202	17	Europe	PMC441526	10.1093/nar/gkh388	32(Web Server issue):W508-11	SCit: web tools for protein side chain conformation analysis.	http://bioserv.rpbs.jussieu.fr/SCit	http://bioserv.rpbs.jussieu.fr/SCit.	NA	0	2017:2:7:11:36:23	404	Not Found
15215439	2004	Nucleic Acids Res	9.202	43	Europe	PMC441541	10.1093/nar/gkh403	32(Web Server issue):W512-6	iMolTalk: an interactive, internet-based protein structure analysis server.	http://i.moltalk.org	http://i.moltalk.org) is a new	NA	0	2017:2:7:11:36:23	500	Can't connect to i.moltalk.org:443 (certificate verify failed)
15215440	2004	Nucleic Acids Res	9.202	23	North Am	PMC441579	10.1093/nar/gkh441	32(Web Server issue):W517-21	LOCnet and LOCtarget: sub-cellular localization for structural genomics targets.	http://www.rostlab.org/services/LOCtarget/	http://www.rostlab.org/services/LOCtarget/.	NA	0	2017:2:7:11:36:23	404	Not Found
15215442	2004	Nucleic Acids Res	9.202	490	North Am	PMC441606	10.1093/nar/gkh468	32(Web Server issue):W526-31	Protein structure prediction and analysis using the Robetta server.	http://robetta.bakerlab.org	http://robetta.bakerlab.org) provides	NA	1	2017:2:7:11:36:24	200	OK
15215443	2004	Nucleic Acids Res	9.202	35	Oceania	PMC441495	10.1093/nar/gkh357	32(Web Server issue):W532-5	Wurst: a protein threading server with a structural scoring function, sequence profiles and optimized substitution matrices.	http://flensburg.zbh.uni-hamburg.de/~wurst/salami/	http://www.zbh.uni-hamburg.de/wurst). Submitted:	http://flensburg.zbh.uni-hamburg.de/~wurst/salami/	1	2017:2:7:11:36:24	200	OK
15215444	2004	Nucleic Acids Res	9.202	28	North Am	PMC441527	10.1093/nar/gkh389	32(Web Server issue):W536-41	FoldMiner and LOCK 2: protein structure comparison and motif discovery on the web.	http://foldminer.stanford.edu/	http://foldminer.stanford.edu/) provides	NA	1	2017:2:7:11:36:25	200	OK
15215445	2004	Nucleic Acids Res	9.202	20	North Am	PMC441533	10.1093/nar/gkh395	32(Web Server issue):W542-4	SledgeHMMER: a web server for batch searching the Pfam database.	http://SledgeHmmer.sdsc.edu	http://SledgeHmmer.sdsc.edu.	NA	0	2017:2:7:11:36:25	500	Can't connect to SledgeHmmer.sdsc.edu:80
15215448	2004	Nucleic Acids Res	9.202	53	North Am	PMC441528	10.1093/nar/gkh390	32(Web Server issue):W555-8	pvSOAR: detecting similar surface patterns of pocket and void surfaces of amino acid residues on proteins.	http://pvsoar.bioengr.uic.edu/	http://pvsoar.bioengr.uic.edu/.	NA	0	2017:2:7:11:36:25	500	Can't connect to pvsoar.bioengr.uic.edu:80
15215449	2004	Nucleic Acids Res	9.202	3	Asia	PMC441610	10.1093/nar/gkh472	32(Web Server issue):W559-61	PepBuild: a web server for building structure data of peptides/proteins.	http://www.imtech.res.in/bvs/pepbuild/	http://www.imtech.res.in/bvs/pepbuild/.	NA	0	2017:2:7:11:36:25	404	Not Found
15215450	2004	Nucleic Acids Res	9.202	25	North Am	PMC441560	10.1093/nar/gkh422	32(Web Server issue):W562-5	LINKER: a web server to generate peptide sequences with extended conformation.	http://astro.temple.edu/~feng/Servers/BioinformaticServers.htm	http://astro.temple.edu/~feng/Servers/BioinformaticServers.htm.	NA	0	2017:2:7:11:36:26	404	Not Found
15215452	2004	Nucleic Acids Res	9.202	24	North Am	PMC441619	10.1093/nar/gkh481	32(Web Server issue):W569-71	CHOP: parsing proteins into structural domains.	http://www.rostlab.org/services/CHOP/	http://www.rostlab.org/services/CHOP/.	NA	0	2017:2:7:11:36:26	404	Not Found
15215453	2004	Nucleic Acids Res	9.202	14	North Am	PMC441574	10.1093/nar/gkh436	32(Web Server issue):W572-5	ProteinDBS: a real-time retrieval system for protein structure comparison.	http://ProteinDBS.rnet.missouri.edu	http://ProteinDBS.rnet.missouri.edu.	NA	1	2017:2:7:11:36:26	200	OK
15215455	2004	Nucleic Acids Res	9.202	147	North Am	PMC441568	10.1093/nar/gkh430	32(Web Server issue):W582-5	FATCAT: a web server for flexible structure comparison and structure similarity searching.	http://fatcat.burnham.org	http://fatcat.burnham.org.	NA	1	2017:2:7:11:36:27	200	OK
15215456	2004	Nucleic Acids Res	9.202	47	Europe	PMC441578	10.1093/nar/gkh440	32(Web Server issue):W586-9	COLORADO3D, a web server for the visual analysis of protein structures.	http://asia.genesilico.pl/colorado3d/	http://asia.genesilico.pl/colorado3d/.	NA	1	2017:2:7:11:36:28	200	OK
15215457	2004	Nucleic Acids Res	9.202	288	North Am	PMC441615	10.1093/nar/gkh477	32(Web Server issue):W590-4	SuperPose: a simple server for sophisticated structural superposition.	http://wishart.biology.ualberta.ca/SuperPose/	http://wishart.biology.ualberta.ca/SuperPose/.	NA	1	2017:2:7:11:36:28	200	OK
15215459	2004	Nucleic Acids Res	9.202	8	Asia	PMC441513	10.1093/nar/gkh375	32(Web Server issue):W602-5	iMOT: an interactive package for the selection of spatially interacting motifs.	http://www.ncbs.res.in/~faculty/mini/imot/supplementary.html	http://www.ncbs.res.in/~faculty/mini/imot/supplementary.html.	NA	0	2017:2:7:11:36:29	404	Not Found
15215460	2004	Nucleic Acids Res	9.202	73	Europe	PMC441538	10.1093/nar/gkh400	32(Web Server issue):W606-9	CaspR: a web server for automated molecular replacement using homology modelling.	http://igs-server.cnrs-mrs.fr/Caspr/	http://igs-server.cnrs-mrs.fr/Caspr/.	NA	0	2017:2:7:11:36:32	500	Can't connect to igs-server.cnrs-mrs.fr:80
15215461	2004	Nucleic Acids Res	9.202	413	Europe	PMC441506	10.1093/nar/gkh368	32(Web Server issue):W610-4	ElNemo: a normal mode web server for protein movement analysis and the generation of templates for molecular replacement.	http://igs-server.cnrs-mrs.fr/elnemo/index.html	http://igs-server.cnrs-mrs.fr/elnemo/index.html.	NA	0	2017:2:7:11:36:32	500	Can't connect to igs-server.cnrs-mrs.fr:80
15215463	2004	Nucleic Acids Res	9.202	1	Europe	PMC441595	10.1093/nar/gkh457	32(Web Server issue):W620-3	FAN: fingerprint analysis of nucleotide sequences.	http://bioinf.man.ac.uk/cgi-bin/neil/ntfront.pl	http://bioinf.man.ac.uk/cgi-bin/neil/ntfront.pl.	NA	0	2017:2:7:11:36:32	404	Not Found
15215464	2004	Nucleic Acids Res	9.202	27	Europe	PMC441624	10.1093/nar/gkh486	32(Web Server issue):W624-7	CSTminer: a web tool for the identification of coding and noncoding conserved sequence tags through cross-species genome comparison.	http://www.caspur.it/CSTminer/	http://www.caspur.it/CSTminer/, is dynami:	NA	0	2017:2:7:11:36:32	404	Not Found
15215466	2004	Nucleic Acids Res	9.202	26	North Am	PMC441565	10.1093/nar/gkh427	32(Web Server issue):W634-7	NLProt: extracting protein names and sequences from papers.	http://cubic.bioc.columbia.edu/services/NLProt/	http://cubic.bioc.columbia.edu/services/NLProt/). Input can:	NA	0	2017:2:7:11:36:32	500	Can't connect to cubic.bioc.columbia.edu:80
15215467	2004	Nucleic Acids Res	9.202	71	North Am	PMC441494	10.1093/nar/gkh356	32(Web Server issue):W638-44	ProMoST (Protein Modification Screening Tool): a web-based tool for mapping protein modifications on two-dimensional gels.	http://proteomics.mcw.edu/promost	http://proteomics.mcw.edu/promost.	NA	1	2017:2:7:11:36:32	200	OK
15215468	2004	Nucleic Acids Res	9.202	3	Asia	PMC441558	10.1093/nar/gkh420	32(Web Server issue):W645-8	BSDD: Biomolecules Segment Display Device--a web-based interactive display tool.	http://iris.physics.iisc.ernet.in/bsdd	http://iris.physics.iisc.ernet.in/bsdd or http::/:	NA	1	2017:2:7:11:36:33	200	OK
15215469	2004	Nucleic Acids Res	9.202	9	North Am	PMC441593	10.1093/nar/gkh455	32(Web Server issue):W649-53	ACMES: fast multiple-genome searches for short repeat sequences with concurrent cross-species information retrieval.	http://acmes.rnet.missouri.edu	http://acmes.rnet.missouri.edu.	NA	0	2017:2:7:11:36:35	500	read timeout
15215471	2004	Nucleic Acids Res	9.202	34	North Am	PMC441548	10.1093/nar/gkh410	32(Web Server issue):W660-4	PlasMapper: a web server for drawing and auto-annotating plasmid maps.	http://wishart.biology.ualberta.ca/PlasMapper	http://wishart.biology.ualberta.ca/PlasMapper.	NA	1	2017:2:7:11:36:55	200	OK
15215472	2004	Nucleic Acids Res	9.202	1011	North Am	PMC441519	10.1093/nar/gkh381	32(Web Server issue):W665-7	PDB2PQR: an automated pipeline for the setup of Poisson-Boltzmann electrostatics calculations.	http://nbcr-222.ucsd.edu/pdb2pqr_2.1.1/	http://agave.wustl.edu/pdb2pqr/). This serv	http://nbcr-222.ucsd.edu/pdb2pqr_2.1.1/	1	2017:2:7:11:36:56	200	OK
15215473	2004	Nucleic Acids Res	9.202	1189	Europe	PMC441509	10.1093/nar/gkh371	32(Web Server issue):W668-73	DICHROWEB, an online server for protein secondary structure analyses from circular dichroism spectroscopic data.	http://www.cryst.bbk.ac.uk/cdweb	http://www.cryst.bbk.ac.uk/cdweb and may b:	NA	0	2017:2:7:11:36:57	404	Not Found
15215475	2004	Nucleic Acids Res	9.202	13	Asia	PMC441522	10.1093/nar/gkh384	32(Web Server issue):W679-85	MoViES: molecular vibrations evaluation server for analysis of fluctuational dynamics of proteins and nucleic acids.	http://ang.cz3.nus.edu.sg/cgi-bin/prog/norm.pl	http://ang.cz3.nus.edu.sg/cgi-bin/prog/norm.pl.	NA	0	2017:2:7:11:36:57	500	Can't connect to ang.cz3.nus.edu.sg:80
15240327	2004	Appl Environ Microbiol	NA	13	Europe	PMC444777	10.1128/AEM.70.7.4390-4392.2004	70(7):4390-2	Online tool for analysis of denaturing gradient gel electrophoresis profiles.	http://www.univie.ac.at/IECB/limno/equibands/EquiBands.html	http://www.univie.ac.at/IECB/limno/equibands/EquiBands.html) that quan:	NA	0	2017:2:7:11:36:57	404	Not Found
15247094	2004	Bioinformatics	5.766	49	Europe	NA	10.1093/bioinformatics/bth401	20(18):3656-8	DNMAD: web-based diagnosis and normalization for microarray data.	http://dnmad.bioinfo.cnio.es	http://dnmad.bioinfo.cnio.es.	NA	1	2017:2:7:11:36:57	200	OK
15247097	2004	Bioinformatics	5.766	122	Europe	NA	10.1093/bioinformatics/bth398	20(18):3647-51	CSB.DB: a comprehensive systems-biology database.	http://www.csbdb.de/	http://csbdb.mpimp-golm.mpg.de/).	http://www.csbdb.de/	1	2017:2:7:11:36:58	200	OK
15256401	2004	Bioinformatics	5.766	62	Europe	NA	10.1093/bioinformatics/bth423	20(18):3682-6	CBS Genome Atlas Database: a dynamic storage for bioinformatic results and sequence data.	www.cbs.dtu.dk/services/GenomeAtlas/suppl/bioinfdatabase	www.cbs.dtu.dk/services/GenomeAtlas/suppl/bioinfdatabase.	NA	1	2017:2:7:11:36:58	200	OK
15256409	2004	Bioinformatics	5.766	5	Europe	NA	10.1093/bioinformatics/bth411	20(18):3665-7	CRH_Server: an online comparative and radiation hybrid mapping server for the canine genome.	http://idefix.univ-rennes1.fr:8080/Dogs/help_rh-server.html	http://idefix.univ-rennes1.fr::8080/Dogs/help_rh-server.html.	NA	0	2017:2:7:11:36:58	500	Can't connect to idefix.univ-rennes1.fr:8080
15256414	2004	Bioinformatics	5.766	4	North Am	NA	10.1093/bioinformatics/bth406	20(18):3662-4	Interactive gene-order comparison for multiple small genomes.	http://gaia.biotech.vt.edu/goat/	http://gaia.biotech.vt.edu/goat/. SUPPLEMEN:	NA	0	2017:2:7:11:37:18	500	Can't connect to gaia.biotech.vt.edu:80
15262782	2004	Bioinformatics	5.766	106	Europe	NA	10.1093/bioinformatics/bth928	20 Suppl 1:i63-8	A neural-network-based method for predicting protein stability changes upon single point mutations.	http://www.biocomp.unibo.it	http://www.biocomp.unibo.it	NA	1	2017:2:7:11:37:18	200	OK
15262814	2004	Bioinformatics	5.766	79	Europe	NA	10.1093/bioinformatics/bth911	20 Suppl 1:i311-7	Tracking repeats using significance and transitivity.	http://ibivu.cs.vu.nl/programs/trustwww	http://ibivu.cs.vu.nl/programs/trustwww	NA	1	2017:2:7:11:37:18	200	OK
15263839	2004	J Struct Funct Genomics	NA	10	North Am	NA	10.1023/B:JSFG.0000029238.86387.90	5(1-2):13-21	Primer Prim'er: a web based server for automated primer design.	http://www-nmr.cabm.rutgers.edu/bioinformatics	http://www-nmr.cabm.rutgers.edu/bioinformatics, www-nmr.c:	NA	1	2017:2:7:11:37:19	200	OK
15269053	2004	AJR Am J Roentgenol	NA	5	North Am	NA	10.2214/ajr.183.2.1830535	183(2):535-7	MyFreePACS: a free web-based radiology image storage and viewing tool.	www.myfreepacs.com	www.myfreepacs.com.	NA	1	2017:2:7:11:37:19	200	OK
15271224	2004	BMC Bioinformatics	2.435	11	North Am	PMC497040	10.1186/1471-2105-5-98	0.276389	Integrated web service for improving alignment quality based on segments comparison.	http://ffas.ljcrf.edu/darman/results/	http://ffas.ljcrf.edu/darman/results/. CONCLUSIO:	NA	0	2017:2:7:11:37:20	500	Can't connect to ffas.ljcrf.edu:80
15281128	2004	Proteins	2.499	164	North Am	NA	10.1002/prot.20176	56(4):753-67	Accurate prediction of solvent accessibility using neural networks-based regression.	http://sable.cchmc.org	http://sable.cchmc.org.	NA	1	2017:2:7:11:37:20	200	OK
15285787	2004	BMC Genomics	3.867	31	Oceania	PMC514892	10.1186/1471-2164-5-51	5(1):51	C-type lectin-like domains in Fugu rubripes.	http://anz.anu.edu.au:8080/Fugu_rubripes/	http://anz.anu.edu.au:8080/Fugu_rubripes/ and their	NA	0	2017:2:7:11:37:21	500	Can't connect to anz.anu.edu.au:8080
15290767	2003	J Bioinform Comput Biol	0.831	4	Asia	NA	NA	1(3):495-504	BTEVAL: a server for evaluation of beta-turn prediction methods.	http://imtech.res.in/raghava/bteval/	http://imtech.res.in/raghava/bteval/	NA	1	2017:2:7:11:37:41	200	OK
15314210	2004	Protein Eng Des Sel	2.364	406	Europe	NA	10.1093/protein/gzh062	17(6):527-36	Analysis and prediction of leucine-rich nuclear export signals.	http://www.cbs.dtu.dk/services/NetNES/	http://www.cbs.dtu.dk/.	http://www.cbs.dtu.dk/services/NetNES/	1	2017:2:7:11:37:42	200	OK
15336912	2004	Mech Ageing Dev	2.892	25	Asia	NA	10.1016/j.mad.2004.06.005	125(8):547-52	Developments of geriatric autopsy database and Internet-based database of Japanese single nucleotide polymorphisms for geriatric research (JG-SNP).	http://www.tmgh.metro.tokyo.jp/jg-snp/english/E_top.html	http://www.tmgh.metro.tokyo.jp/jg-snp/english/E_top.html). The data	NA	0	2017:2:7:11:37:42	500	read timeout
15342559	2004	Genome Res	11.351	8	Asia	PMC515322	10.1101/gr.2524704	14(9):1756-66	EGPred: prediction of eukaryotic genes using ab initio methods after combining with sequence similarity approaches.	http://www.imtech.res.in/raghava/egpred/	http://www.imtech.res.in/raghava/egpred/.	NA	1	2017:2:7:11:38:2	200	OK
15347577	2005	Bioinformatics	5.766	2	North Am	NA	10.1093/bioinformatics/bti012	21(3):388-9	Tracker: continuous HMMER and BLAST searching.	http://jay.bioinformatics.ku.edu/tracker/index.html	http://jay.bioinformatics.ku.edu/tracker/index.html. A distrib:	NA	0	2017:2:7:11:38:3	500	Can't connect to jay.bioinformatics.ku.edu:80
15347578	2005	Bioinformatics	5.766	32	Europe	NA	10.1093/bioinformatics/bti013	21(3):393-5	The SSEA server for protein secondary structure alignment.	http://protein.cribi.unipd.it/ssea/	http://protein.cribi.unipd.it/ssea/. The execu:	NA	1	2017:2:7:11:38:3	200	OK
15354696	2004	Behav Res Methods Instrum Comput	NA	18	Europe	NA	NA	36(2):304-11	Scientific LogAnalyzer: a web-based tool for analyses of server log files in psychological research.	http://genpsylab-logcrunsh.unizh.ch/	http://genpsylab-logcrunsh.unizh.ch/.	NA	0	2017:2:7:11:38:3	500	Can't connect to genpsylab-logcrunsh.unizh.ch:80
15357877	2004	BMC Bioinformatics	2.435	56	North Am	PMC517928	10.1186/1471-2105-5-130	0.298611	GDR (Genome Database for Rosaceae): integrated web resources for Rosaceae genomics and genetics research.	http://www.genome.clemson.edu/gdr/	http://www.genome.clemson.edu/gdr/.	NA	0	2017:2:7:11:38:3	404	Not Found
15373897	2004	Clin Microbiol Infect	NA	NA	Europe	NA	10.1111/j.1469-0691.2004.00943.x	10(10):948-50	MOP-UP: an online tool for finding strain-specific primers or motifs in DNA or protein alignments.	http://www.hpa.org.uk/srmd/bioinformatics/tools/mop-ups.htm	http://www.hpa.org.uk/srmd/bioinformatics/tools/mop-ups.htm.	NA	0	2017:2:7:11:38:4	404	Not Found
15374859	2005	Bioinformatics	5.766	34	Europe	NA	10.1093/bioinformatics/bti037	21(4):545-7	Online synonymous codon United Statesge analyses with the ade4 and seqinR packages.	http://doua.prabi.fr/templates/software	http://pbil.univ-lyon1.fr/datasets/charif04/ with a de:	http://doua.prabi.fr/templates/software	1	2017:2:7:11:38:4	200	OK
15374870	2005	Bioinformatics	5.766	23	North Am	NA	10.1093/bioinformatics/bti024	21(4):557-9	MAP-O-MAT: internet-based linkage mapping.	http://compgen.rutgers.edu/mapomat/	http://compgen.rutgers.edu/mapomat/ CONTACT::	NA	0	2017:2:7:11:38:4	404	Not Found
15378695	2004	Proteomics	4.079	24	Europe	NA	10.1002/pmic.200400818	4(12):3864-80	Activation and expression of proteins during synchronous germination of aerial spores of Streptomyces granaticolor.	http://proteom.biomed.cas.cz	http://proteom.biomed.cas.cz.	NA	1	2017:2:7:11:38:4	200	OK
15383143	2004	BMC Bioinformatics	2.435	3	North Am	PMC520813	10.1186/1471-2105-5-134	0.301389	PATTERNFINDER: combined analysis of DNA regulatory sequences and double-helix stability.	http://wings.buffalo.edu/gsa/dna/dk/PFP/	http://wings.buffalo.edu/gsa/dna/dk/PFP/	NA	0	2017:2:7:11:38:4	404	Not Found
15383156	2004	BMC Bioinformatics	2.435	19	Europe	PMC526382	10.1186/1471-2105-5-135	0.302083	Profiled support vector machines for antisense oligonucleotide efficacy prediction.	http://aosvm.cgb.ki.se/	http://aosvm.cgb.ki.se/. CONCLUSIO	NA	0	2017:2:7:11:38:7	500	Can't connect to aosvm.cgb.ki.se:80
15383676	2004	RNA	NA	1029	Europe	PMC1370637	10.1261/rna.5248604	10(10):1507-17	Fast and effective prediction of microRNA/target duplexes.	http://bibiserv.techfak.uni-bielefeld.de/rnahybrid/	http://bibiserv.techfak.uni-bielefeld.de/rnahybrid/).	NA	1	2017:2:7:11:38:7	200	OK
15453918	2004	BMC Bioinformatics	2.435	35	Europe	PMC522807	10.1186/1471-2105-5-138	0.304167	cuticleDB: a relational database of Arthropod cuticular proteins.	http://bioinformatics.biol.uoa.gr/cuticleDB	http://bioinformatics.biol.uoa.gr/cuticleDB. CONCLUSIO:	NA	1	2017:2:7:11:38:7	200	OK
15468317	2005	Proteins	2.499	68	Europe	NA	10.1002/prot.20288	58(1):190-9	MSDsite: a database search and retrieval system for the analysis and viewing of bound ligands and active sites.	http://www.ebi.ac.uk/msd-srv/msdsite	http://www.ebi.ac.uk/msd-srv/msdsite.	NA	1	2017:2:7:11:38:7	200	OK
15488147	2004	BMC Bioinformatics	2.435	5	Europe	PMC526202	10.1186/1471-2105-5-150	0.3125	PCOGR: phylogenetic COG ranking as an online tool to judge the specificity of COGs with respect to freely definable groups of organisms.	http://www.uni-wh.de/pcogr	http://www.uni-wh.de/pcogr and is li:	NA	1	2017:2:7:11:38:8	200	OK
15506991	2004	In Silico Biol	NA	2	Asia	NA	NA	4(4):411-5	A search tool for identification and analysis of conserved sequence patterns in Saccharomyces spp. orthologous promoter.	http://www2.imtech.res.in/	http://www2.imtech.res.in/ anand/sac:	NA	0	2017:2:7:11:38:8	500	Can't connect to www2.imtech.res.in:80
15509307	2004	BMC Bioinformatics	2.435	8	Asia	PMC533867	10.1186/1471-2105-5-167	0.324306	Improvement of alignment accuracy utilizing sequentially conserved motifs.	http://caps.ncbs.res.in/FMALIGN/Home.html	http://caps.ncbs.res.in/FMALIGN/Home.html.	NA	1	2017:2:7:11:38:8	200	OK
15523666	2005	Proteins	2.499	155	North Am	PMC1408319	10.1002/prot.20308	58(2):321-8	Fold recognition by combining sequence profiles derived from evolution and from depth-dependent structural alignment of fragments.	http://theory.med.buffalo.edu	http://theory.med.buffalo.edu.	NA	0	2017:2:7:11:38:9	500	read timeout
15556477	2004	Comput Biol Chem	1.014	47	Europe	NA	10.1016/j.compbiolchem.2004.09.006	28(5-6):367-74	Comparing two K-category assignments by a K-category correlation coefficient.	http://rk.kvl.dk/	http://rk.kvl.dk/.	NA	1	2017:2:7:11:38:29	200	OK
15564299	2005	Bioinformatics	5.766	6	North Am	NA	10.1093/bioinformatics/bti161	21(8):1693-4	Procom: a web-based tool to compare multiple eukaryotic proteomes.	http://ural.wustl.edu/~billy/Procom/	http://ural.wustl.edu/~billy/Procom/ CONTACT::	NA	0	2017:2:7:11:38:29	404	Not Found
15572777	2004	Acta Crystallogr D Biol Crystallogr	NA	239	Europe	NA	10.1107/S0907444904013253	60(Pt 12 Pt 1):2240-9	The Uppsala Electron-Density Server.	http://eds.bmc.uu.se/	http://eds.bmc.uu.se/) is a web-:	NA	1	2017:2:7:11:38:29	200	OK
15578937	2004	Comb Chem High Throughput Screen	NA	52	Europe	NA	10.2174/1386207043328265	7(8):757-61	Ligand.Info small-molecule Meta-Database.	http://Ligand.Info	http://Ligand.Info web page.:	NA	1	2017:2:7:11:38:30	200	OK
15585524	2005	Bioinformatics	5.766	291	Europe	NA	10.1093/bioinformatics/bti203	21(8):1719-20	Porter: a new, accurate server for protein secondary structure prediction.	http://distill.ucd.ie/porter/	http://distill.ucd.ie/porter/ CONTACT::	NA	1	2017:2:7:11:38:31	200	OK
15588317	2004	BMC Bioinformatics	2.435	19	North Am	PMC539353	10.1186/1471-2105-5-195	0.34375	GECKO: a complete large-scale gene expression analysis platform.	http://sourceforge.net/projects/geckoe	http://sourceforge.net/projects/geckoe. In totali:	NA	1	2017:2:7:11:38:31	200	OK
15590941	2005	Genome Res	11.351	164	North Am	PMC540288	10.1101/gr.3007205	15(1):184-94	Mulan: multiple-sequence local alignment and visualization for studying function and evolution.	https://mulan.dcode.org/	http://www.bx.psu.edu/miller_lab/.	https://mulan.dcode.org/	1	2017:2:7:11:38:33	200	OK
15591357	2005	Bioinformatics	5.766	39	Europe	NA	10.1093/bioinformatics/bti196	21(8):1376-82	Highly specific and accurate selection of siRNAs for high-throughput functional assays.	http://side.bioinfo.cnio.es	http://side.bioinfo.cnio.es. The progr:	NA	0	2017:2:7:11:38:34	500	read timeout
15608179	2005	Nucleic Acids Res	9.202	161	Europe	PMC539988	10.1093/nar/gki034	33(Database issue):D212-5	The ProDom database of protein domain families: more emphasis on 3D.	http://prodom.prabi.fr/prodom/current/html/form.php	NA	http://prodom.prabi.fr/prodom/current/html/form.php	0	2017:2:7:11:38:54	500	read timeout
15608183	2005	Nucleic Acids Res	9.202	33	Europe	PMC539984	10.1093/nar/gki030	33(Database issue):D226-9	The SYSTERS Protein Family Database in 2005.	http://systers.molgen.mpg.de	http://systers.molgen.mpg.de) provides	NA	0	2017:2:7:11:39:14	500	read timeout
15608188	2005	Nucleic Acids Res	9.202	207	Europe	PMC539978	10.1093/nar/gki024	33(Database issue):D247-51	The CATH Domain Structure Database and related resources Gene3D and DHS provide comprehensive domain family information for genome analysis.	http://www.biochem.ucl.ac.uk/cgi-bin/cath/CathServer.pl	http://www.biochem.ucl.ac.uk/cgi-bin/cath/CathServer.pl) providing:	NA	0	2017:2:7:11:39:34	403	Forbidden
15608198	2005	Nucleic Acids Res	9.202	34	North Am	PMC540091	10.1093/nar/gki137	33(Database issue):D289-93	Biomedical term mapping databases.	http://www.hpl.hp.com/research/idl/projects/abbrev.html	http://www.hpl.hp.com/research/idl/projects/abbrev.html). In additi:	NA	1	2017:2:7:11:39:34	200	OK
15608207	2005	Nucleic Acids Res	9.202	11	Europe	PMC539996	10.1093/nar/gki042	33(Database issue):D321-4	Metagrowth: a new resource for the building of metabolic hypotheses in microbiology.	http://igs-server.cnrs-mrs.fr/axenic/	http://igs-server.cnrs-mrs.fr/axenic/.	NA	0	2017:2:7:11:39:35	500	Can't connect to igs-server.cnrs-mrs.fr:80
15608253	2005	Nucleic Acids Res	9.202	116	Europe	PMC539986	10.1093/nar/gki032	33(Database issue):D523-6	IPD--the Immuno Polymorphism Database.	http://www.ebi.ac.uk/ipd/	http://www.ebi.ac.uk/ipd/) is a set	NA	1	2017:2:7:11:39:35	200	OK
15608259	2005	Nucleic Acids Res	9.202	13	Asia	PMC540039	10.1093/nar/gki085	33(Database issue):D550-2	5'SAGE: 5'-end Serial Analysis of Gene Expression database.	http://5sage.gi.k.u-tokyo.ac.jp/	http://5sage.gi.k.u-tokyo.ac.jp/.	NA	0	2017:2:7:11:39:35	500	Can't connect to 5sage.gi.k.u-tokyo.ac.jp:80
15608286	2005	Nucleic Acids Res	9.202	76	Europe	PMC540042	10.1093/nar/gki088	33(Database issue):D671-4	VBASE2, an integrative V gene database.	http://www.vbase2.org	http://www.dnaplot.com/das.	http://www.vbase2.org	1	2017:2:7:11:39:35	200	OK
15609341	2005	Proteins	2.499	109	North Am	NA	10.1002/prot.20331	58(3):618-27	FAST: a novel protein structure alignment algorithm.	http://biowulf.bu.edu/FAST/	http://biowulf.bu.edu/FAST/.	NA	0	2017:2:7:11:39:36	500	Can't connect to biowulf.bu.edu:443 (certificate verify failed)
15613393	2005	Bioinformatics	5.766	32	Asia	NA	10.1093/bioinformatics/bti232	21(8):1721-3	PreDs: a server for predicting dsDNA-binding site on protein molecular surfaces.	http://pre-s.protein.osaka-u.ac.jp/~preds/	http://pre-s.protein.osaka-u.ac.jp/~preds/ CONTACT::	NA	0	2017:2:7:11:39:36	500	Can't connect to pre-s.protein.osaka-u.ac.jp:80
15613394	2005	Bioinformatics	5.766	NA	Europe	NA	10.1093/bioinformatics/bti231	21(8):1727-9	Bloader--a batch loader application for MIAMExpress.	http://www.ansorge-group.embl.de/bloader	http://www.ansorge-group.embl.de/bloader CONTACT::	NA	0	2017:2:7:11:39:37	500	read timeout
15614759	2005	Proteins	2.499	92	Asia	NA	10.1002/prot.20305	58(3):610-7	The ConSurf-HSSP database: the mapping of evolutionary conservation among homologs onto PDB structures.	http://bental.tau.ac.il/new_ConSurfDB/	http://consurf-hssp.tau.ac.il).	http://bental.tau.ac.il/new_ConSurfDB/	1	2017:2:7:11:39:57	200	OK
15630306	2004	Biofactors	4.504	7	Asia	NA	NA	22(1-4):329-32	The construction of web database server-client system for functional food factors.	http://www.life-science.jp/FFF	http://www.life-science.jp/FFF for test	NA	0	2017:2:7:11:39:57	404	Not Found
15642094	2005	Genome Biol	11.313	204	North Am	PMC549063	10.1186/gb-2004-6-1-r2	6(1):R2	Computational prediction of human metabolic pathways from the complete human genome.	http://HumanCyc.org/	http://HumanCyc.org/. We descri:	NA	1	2017:2:7:11:39:58	200	OK
15647269	2005	J Biol Chem	4.258	173	Asia	NA	10.1074/jbc.M411789200	280(15):14427-32	Support vector machine-based method for subcellular localization of human proteins using amino acid compositions, their order, and similarity search.	www.imtech.res.in/raghava/hslpred/	www.imtech.res.in/raghava/hslpred/ or bioinf	NA	1	2017:2:7:11:40:0	200	OK
15647294	2005	Bioinformatics	5.766	90	Asia	NA	10.1093/bioinformatics/bti259	21(9):2101-3	Selecton: a server for detecting evolutionary forces at a single amino-acid site.	http://selecton.bioinfo.tau.ac.il/	http://selecton.bioinfo.tau.ac.il/overview.html. A set of	NA	1	2017:2:7:11:40:1	200	OK
15649328	2005	Int J Health Geogr	2.27	NA	NA	PMC546191	10.1186/1476-072X-4-2	4(1):2	Research protocol: EB-GIS4HEALTH UK - foundation evidence base and ontology-based framework of modular, reUnited Statesble models for UK/NHS health and healthcare GIS applications.	http://protege.stanford.edu/	http://protege.stanford.edu/ based on	NA	1	2017:2:7:11:40:2	200	OK
15657096	2005	Bioinformatics	5.766	117	North Am	NA	10.1093/bioinformatics/bti277	21(9):1901-7	PIBASE: a comprehensive database of structurally defined protein interfaces.	http://salilab.org/pibase/suppinfo.html	http://salilab.org/pibase/suppinfo.html.	NA	1	2017:2:7:11:40:2	200	OK
15657103	2005	Bioinformatics	5.766	43	North Am	NA	10.1093/bioinformatics/bti269	21(9):2140-1	EPIMHC: a curated database of MHC-binding peptides for customized computational vaccinology.	http://immunax.dfci.harvard.edu/bioinformatics/epimhc/	http://immunax.dfci.harvard.edu/bioinformatics/epimhc/	NA	0	2017:2:7:11:40:3	500	read timeout
15667143	2005	J Chem Inf Model	3.657	NA	NA	PMC1360656	10.1021/ci049714+	45(1):177-82	ZINC--a free database of commercially available compounds for virtual screening.	http://zinc.docking.org	http://zinc.docking.org) in severa:	NA	1	2017:2:7:11:40:24	200	OK
15681613	2005	Nucleic Acids Res	9.202	NA	NA	PMC548337	10.1093/nar/gki181	33(2):616-21	Measuring genome conservation across taxa: divided strains and united kingdoms.	http://maine.ebi.ac.uk:8000/cgi-bin/gps/GPS.pl>	http://maine.ebi.ac.uk::8000/cgi-bin/gps/GPS.pl>.	NA	0	2017:2:7:11:40:25	500	Can't connect to maine.ebi.ac.uk:8000
15686593	2005	BMC Bioinformatics	2.435	11	North Am	PMC549201	10.1186/1471-2105-6-20	06:20:00	GeneNotes--a novel information management software for biologists.	http://bayes.fas.harvard.edu/genenotes/	http://bayes.fas.harvard.edu/genenotes/. CONCLUSIO	NA	0	2017:2:7:11:40:25	500	read timeout
15696542	2005	Proteins	2.499	47	Asia	NA	10.1002/prot.20404	59(1):30-7	Prediction of protein relative solvent accessibility with a two-stage SVM approach.	http://birc.ntu.edu.sg/~pas0186457/rsa.html	http://birc.ntu.edu.sg/~pas0186457/rsa.html).	NA	0	2017:2:7:11:40:45	500	Can't connect to birc.ntu.edu.sg:80
15699023	2005	Bioinformatics	5.766	119	Asia	NA	10.1093/bioinformatics/bti309	21(10):2522-4	PSLpred: prediction of subcellular localization of bacterial proteins.	http://www.imtech.res.in/raghava/pslpred/	http://www.imtech.res.in/raghava/pslpred/	NA	1	2017:2:7:11:40:45	200	OK
15702954	2004	Appl Bioinformatics	NA	30	Europe	NA	10.2165/00822942-200403040-00005	3(4):237-40	HCVDB: hepatitis C virus sequences database.	http://hepatitis.ibcp.fr	http://hepatitis.ibcp.fr.	NA	0	2017:2:7:11:40:46	500	read timeout
15702956	2004	Appl Bioinformatics	NA	6	Asia	NA	10.2165/00822942-200403040-00007	3(4):253-6	Biosphere: the interoperation of web services in microarray cluster analysis.	http://rook.cecid.hku.hk:8280/BiosphereServer	http://rook.cecid.hku.hk::8280/BiosphereServer.	NA	0	2017:2:7:11:41:6	500	Can't connect to rook.cecid.hku.hk:8280
15718595	2004	Stud Health Technol Inform	NA	NA	NA	NA	NA	105:61-9	New developments in digital pathology: from telepathology to virtual pathology laboratory.	http://telepath.patho.unibas.ch	http://telepath.patho.unibas.ch) for coor:	NA	1	2017:2:7:11:41:27	200	OK
15720719	2005	BMC Bioinformatics	2.435	135	Asia	PMC550660	10.1186/1471-2105-6-33	06:33:00	PSSM-based prediction of DNA binding sites in proteins.	http://www.netasa.org/dbs-pssm/	http://www.netasa.org/dbs-pssm/	NA	0	2017:2:7:11:41:27	404	Not Found
15723697	2005	BMC Genomics	3.867	5	Europe	PMC555765	10.1186/1471-2164-6-24	06:24:00	Comparative promoter region analysis powered by CORG.	http://tomcat.molgen.mpg.de:8080/das	http://tomcat.molgen.mpg.de::8080/das. The benef:	NA	0	2017:2:7:11:41:27	500	Can't connect to tomcat.molgen.mpg.de:8080
15728119	2005	Bioinformatics	5.766	44	Europe	NA	10.1093/bioinformatics/bti333	21(10):2525-7	AutoMotif server: prediction of single residue post-translational modifications in proteins.	http://automotif.bioinfo.pl/	http://automotif.bioinfo.pl/	NA	0	2017:2:7:11:41:27	500	Can't connect to automotif.bioinfo.pl:80
15743531	2005	BMC Bioinformatics	2.435	111	North Am	PMC555943	10.1186/1471-2105-6-41	06:41:00	PHACCS, an online tool for estimating the structure and diversity of uncultured viral communities using metagenomic information.	http://phage.sdsu.edu/phaccs	http://phage.sdsu.edu/phaccs, Phage Com:	NA	1	2017:2:7:11:41:27	200	OK
15746289	2005	Bioinformatics	5.766	15	Asia	NA	10.1093/bioinformatics/bti356	21(10):2570-1	WebAllergen: a web server for predicting allergenic proteins.	http://weballergen.bii.a-star.edu.sg/	http://weballergen.bii.a-star.edu.sg/	NA	0	2017:2:7:11:41:28	500	Can't connect to weballergen.bii.a-star.edu.sg:80
15746290	2005	Bioinformatics	5.766	13	Europe	NA	10.1093/bioinformatics/bti355	21(10):2550-1	Gene-Expression Omnibus integration and clustering tools in SeqExpress.	http://www.seqexpress.com	http://www.seqexpress.com and runs	NA	0	2017:2:7:11:41:29	406	Not Acceptable
15746292	2005	Bioinformatics	5.766	93	North Am	NA	10.1093/bioinformatics/bti353	21(10):2362-9	Multiple flexible structure alignment using partial order graphs.	http://fatcat.burnham.org/POSA	http://fatcat.burnham.org/POSA	NA	1	2017:2:7:11:41:29	200	OK
15749693	2005	Bioinformatics	5.766	64	Asia	NA	10.1093/bioinformatics/bti366	21(10):2541-3	PSIbase: a database of Protein Structural Interactome map (PSIMAP).	http://psibase.kaist.ac.kr/	http://psibase.kaist.ac.kr/	NA	0	2017:2:7:11:41:30	500	Can't connect to psibase.kaist.ac.kr:80
15751111	2005	J Bioinform Comput Biol	0.831	177	North Am	NA	10.1142/S0219720005000886	3(1):35-60	Optimizing long intrinsic disorder predictors with protein evolutionary information.	http://www.ist.temple.edu/disprot	http://www.ist.temple.edu/disprot.	NA	1	2017:2:7:11:41:30	200	OK
15762993	2005	BMC Bioinformatics	2.435	79	Europe	PMC1274249	10.1186/1471-2105-6-52	06:52:00	WEBnm@: a web application for normal mode analyses of proteins.	http://apps.cbu.uib.no/webnma/home	http://www.bioinfo.no/tools/normalmodes. We presen:	http://apps.cbu.uib.no/webnma/home	1	2017:2:7:11:41:31	200	OK
15768403	2005	Proteins	2.499	181	North Am	NA	10.1002/prot.20441	59(3):467-75	Combining prediction of secondary structure and solvent accessibility in proteins.	http://sable.cchmc.org	http://sable.cchmc.org.	NA	1	2017:2:7:11:41:32	200	OK
15769841	2005	Bioinformatics	5.766	61	North Am	NA	10.1093/bioinformatics/bti376	21(10):2322-8	Identification and measurement of neighbor-dependent nucleotide substitution processes.	http://evogen.molgen.mpg.de/server/substitution-analysis	http://evogen.molgen.mpg.de/server/substitution-analysis	NA	1	2017:2:7:11:41:32	200	OK
15773999	2005	BMC Bioinformatics	2.435	33	Asia	PMC1083413	10.1186/1471-2105-6-59	06:59:00	Correlation and prediction of gene expression level from amino acid and dipeptide composition of its protein.	http://kiwi.postech.ac.kr/raghava/lgepred/	http://kiwi.postech.ac.kr/raghava/lgepred/. This serv:	NA	0	2017:2:7:11:41:32	500	read timeout
15797916	2005	Bioinformatics	5.766	14	North Am	NA	10.1093/bioinformatics/bti374	21(10):2287-93	Quasi-consensus-based comparison of profile hidden Markov models for protein sequences.	http://liao.cis.udel.edu/website/servers/modmod	http://liao.cis.udel.edu/website/servers/modmod	NA	1	2017:2:7:11:41:52	200	OK
15822097	2005	Proteins	2.499	74	Europe	NA	10.1002/prot.20461	59(4):828-39	High accuracy prediction of beta-turns and their types using propensities and multiple alignments.	http://mobyle.rpbs.univ-paris-diderot.fr/cgi-bin/portal.py#forms::COUDES	http://bioserv.rpbs.jussieu.fr/Coudes/index.html within th:	http://mobyle.rpbs.univ-paris-diderot.fr/cgi-bin/portal.py#forms::COUDES	1	2017:2:7:11:41:53	200	OK
15836795	2005	BMC Bioinformatics	2.435	45	Europe	PMC1090551	10.1186/1471-2105-6-101	0.320139	MARS: microarray analysis, retrieval, and storage system.	https://mars.genome.tugraz.at/marsWEB/	http://genome.tugraz.at.	https://mars.genome.tugraz.at/marsWEB/	1	2017:2:7:11:41:53	200	OK
15840708	2005	Bioinformatics	5.766	38	Asia	NA	10.1093/bioinformatics/bti445	21(12):2917-20	Meta-DP: domain prediction meta-server.	http://cafasp4.bioinformatics.buffalo.edu/dp/update.html	http://cafasp4.bioinformatics.buffalo.edu/dp/update.html.	NA	0	2017:2:7:11:41:53	500	read timeout
15847374	1999	Rom J Morphol Embryol	NA	12	Europe	NA	NA	45:3-9	From telepathology to virtual pathology institution: the new world of digital pathology.	http://telepath.patho.unibas.ch	http://telepath.patho.unibas.ch) for coord:	NA	1	2017:2:7:11:42:13	200	OK
15847681	2005	BMC Bioinformatics	2.435	35	Europe	PMC1087828	10.1186/1471-2105-6-104	0.322222	A method for the prediction of GPCRs coupling specificity to G-proteins using refined profile Hidden Markov Models.	http://bioinformatics.biol.uoa.gr/PRED-COUPLE	http://bioinformatics.biol.uoa.gr/PRED-COUPLE.	NA	1	2017:2:7:11:42:14	200	OK
15858275	2005	Acta Crystallogr D Biol Crystallogr	NA	9	Asia	NA	10.1107/S0907444905005883	61(Pt 5):634-6	SSEP-2.0: Secondary Structural Elements of Proteins.	http://cluster.physics.iisc.ernet.in/ssep	http://cluster.physics.iisc.ernet.in/ssep or http::/:	NA	1	2017:2:7:11:42:14	200	OK
15868141	2005	Immunogenetics	2.303	160	North Am	NA	10.1007/s00251-005-0798-y	57(5):304-14	Automated generation and evaluation of specific MHC binding predictive tools: ARB matrix applications.	http://epitope.liai.org:8080/matrix	http://epitope.liai.org::8080/matrix web serve:	NA	0	2017:2:7:11:42:14	500	Can't connect to epitope.liai.org:8080
15890068	2005	BMC Bioinformatics	2.435	6	North Am	PMC1174863	10.1186/1471-2105-6-114	0.329167	CAGER: classification analysis of gene expression regulation using multiple information sources.	http://cic.cs.wustl.edu/CAGER/cager.htm.bak	http://cic.cs.wustl.edu/CAGER/, allows th:	http://cic.cs.wustl.edu/CAGER/cager.htm.bak	1	2017:2:7:11:42:34	200	OK
15890082	2005	BMC Bioinformatics	2.435	19	North Am	PMC1142304	10.1186/1471-2105-6-116	0.330556	Predicting functional sites with an automated algorithm suitable for heterogeneous datasets.	http://www.pmap.csupomona.edu/MINER/	http://www.pmap.csupomona.edu/MINER/. Pre-calcu:	NA	0	2017:2:7:11:42:35	500	Can't connect to www.pmap.csupomona.edu:80
15901254	2004	Genomics Proteomics Bioinformatics	2.168	9	Asia	NA	NA	2(4):253-5	A novel method for N-terminal acetylation prediction.	http://166.111.24.5/acetylation.html	http://166.111.24.5/acetylation.html.	NA	0	2017:2:7:11:42:35	500	read timeout
15908030	2005	Virus Res	2.526	16	Asia	NA	10.1016/j.virusres.2005.04.016	113(1):64-71	Analysis and prediction of baculovirus promoter sequences.	http://life.zsu.edu.cn/LAPP/	http://life.zsu.edu.cn/LAPP/.	NA	0	2017:2:7:11:42:55	500	Can't connect to life.zsu.edu.cn:80
15910681	2005	BMC Bioinformatics	2.435	65	Europe	PMC1173083	10.1186/1471-2105-6-124	0.336111	arrayCGHbase: an analysis platform for comparative genomic hybridization microarrays.	http://medgen.ugent.be/arrayCGHbase/	http://medgen.ugent.be/arrayCGHbase/.	NA	1	2017:2:7:11:42:55	200	OK
15914542	2005	Bioinformatics	5.766	26	Europe	NA	10.1093/bioinformatics/bti513	21(15):3322-3	Efficient recognition of folds in protein 3D structures by the improved PRIDE algorithm.	http://www.icgeb.org/pride	http://pride.szbk.u-szeged.hu and http:::	http://www.icgeb.org/pride	0	2017:2:7:11:42:56	404	Not Found
15919727	2005	Bioinformatics	5.766	4	Europe	NA	10.1093/bioinformatics/bti507	21(15):3312-3	SECISDesign: a server to design SECIS-elements within the coding sequence.	http://www.bio.inf.uni-jena.de/Software/SECISDesign/index.html	http://www.bio.inf.uni-jena.de/Software/SECISDesign/index.html.	NA	0	2017:2:7:11:42:56	503	Service Unavailable
15923205	2005	Bioinformatics	5.766	28	North Am	NA	10.1093/bioinformatics/bti520	21(15):3318-9	COREX/BEST server: a web browser-based program that calculates regional stability variations within protein structures.	http://best.bio.jhu.edu/BEST/index.php	http://best.utmb.edu/BEST/.	http://best.bio.jhu.edu/BEST/indeNA.php	1	2017:2:7:11:42:56	200	OK
15961464	2005	Bioinformatics	5.766	155	Europe	NA	10.1093/bioinformatics/bti1014	21 Suppl 1:i251-7	An HMM posterior decoder for sequence feature prediction that includes homology information.	http://phobius.cgb.ki.se/poly.html	http://phobius.cgb.ki.se/poly.html. An implem:	NA	1	2017:2:7:11:42:58	200	OK
15963230	2005	BMC Bioinformatics	2.435	63	Asia	PMC1182350	10.1186/1471-2105-6-152	0.355556	pSLIP: SVM based protein subcellular localization prediction using multiple physicochemical properties.	http://pslip.bii.a-star.edu.sg/	http://pslip.bii.a-star.edu.sg/).	NA	0	2017:2:7:11:42:59	500	Can't connect to pslip.bii.a-star.edu.sg:80
15972014	2005	In Silico Biol	NA	17	North Am	NA	NA	5(2):187-98	Bioinformatics visualization and integration with open standards: the Bluejay genomic browser.	http://bluejay.ucalgary.ca	http://bluejay.ucalgary.ca.	NA	0	2017:2:7:11:43:0	500	Can't connect to bluejay.ucalgary.ca:80
15977173	2005	Hum Mutat	5.089	165	Europe	NA	10.1002/humu.20201	26(2):63-8	LOVD: easy creation of a locus-specific sequence variation database using an LSDB-in-a-box approach.	www.DMD.nl/LOVD/	www.DMD.nl/LOVD/). To promot	NA	1	2017:2:7:11:43:0	200	OK
15980017	2005	Protein Eng Des Sel	2.364	16	Asia	NA	10.1093/protein/gzi041	18(8):365-8	CTKPred: an SVM-based method for the prediction and classification of the cytokine superfamily.	http://bioinfo.tsinghua.edu.cn/~huangni/CTKPred/	http://bioinfo.tsinghua.edu.cn/~huangni/CTKPred/.	NA	0	2017:2:7:11:43:1	500	Can't connect to bioinfo.tsinghua.edu.cn:80
15980436	2005	Nucleic Acids Res	9.202	123	Asia	PMC1160120	10.1093/nar/gki359	33(Web Server issue):W105-10	LOCSVMPSI: a web server for subcellular localization of eukaryotic proteins using SVM and profile of PSI-BLAST.	http://Bioinformatics.ustc.edu.cn/LOCSVMPSI/LOCSVMPSI.php	http://Bioinformatics.ustc.edu.cn/LOCSVMPSI/LOCSVMPSI.php.	NA	0	2017:2:7:11:43:1	404	Not Found
15980441	2005	Nucleic Acids Res	9.202	19	Asia	PMC1160188	10.1093/nar/gki427	33(Web Server issue):W130-2	DIAL: a web-based server for the automatic identification of structural domains in proteins.	http://bioinformatics.bc.edu/clotelab/DIAL/index.html	http://www.ncbs.res.in/~faculty/mini/DIAL/supplement.html.	NA	1	2017:2:7:11:43:2	200	OK
15980442	2005	Nucleic Acids Res	9.202	28	Europe	PMC1160259	10.1093/nar/gki499	33(Web Server issue):W133-7	pdbFun: mass selection and fast comparison of annotated PDB residues.	http://pdbfun.uniroma2.it	http://pdbfun.uniroma2.it) is a web	NA	0	2017:2:7:11:43:3	500	read timeout
15980443	2005	Nucleic Acids Res	9.202	40	North Am	PMC1160118	10.1093/nar/gki357	33(Web Server issue):W138-42	PEPVAC: a web server for multi-epitope vaccine development based on the prediction of supertypic MHC ligands.	http://immunax.dfci.harvard.edu/PEPVAC/	http://immunax.dfci.harvard.edu/PEPVAC/.	NA	0	2017:2:7:11:43:23	500	read timeout
15980444	2005	Nucleic Acids Res	9.202	52	Asia	PMC1160112	10.1093/nar/gki351	33(Web Server issue):W143-7	GPCRsclass: a web tool for the classification of amine type of G-protein-coupled receptors.	http://bioinformatics.uams.edu/raghava/gpersclass/	http://bioinformatics.uams.edu/raghava/gpersclass/ (mirror s:	NA	0	2017:2:7:11:43:43	500	read timeout
15980447	2005	Nucleic Acids Res	9.202	37	Asia	PMC1160128	10.1093/nar/gki367	33(Web Server issue):W164-7	TMBETA-NET: discrimination and prediction of membrane spanning beta-strands in outer membrane proteins.	http://psfs.cbrc.jp/tmbeta-net/	http://psfs.cbrc.jp/tmbeta-net/.	NA	0	2017:2:7:11:44:3	502	Bad Gateway
15980448	2005	Nucleic Acids Res	9.202	162	Asia	PMC1160221	10.1093/nar/gki460	33(Web Server issue):W168-71	CEP: a conformational epitope prediction server.	http://196.1.114.49/cgi-bin/cep.pl	http://bioinfo.ernet.in/cep.htm) provides	http://196.1.114.49/cgi-bin/cep.pl	0	2017:2:7:11:44:4	500	read timeout
15980450	2005	Nucleic Acids Res	9.202	35	Oceania	PMC1160239	10.1093/nar/gki479	33(Web Server issue):W180-3	PREDBALB/c: a system for the prediction of peptide binding to H2d molecules, a haplotype of the BALB/c mouse.	http://cvc.dfci.harvard.edu/balbc/	http://antigen.i2r.a-star.edu.sg/predBalbc/.	http://cvc.dfci.harvard.edu/balbc/	1	2017:2:7:11:44:24	200	OK
15980451	2005	Nucleic Acids Res	9.202	127	North Am	PMC1160154	10.1093/nar/gki393	33(Web Server issue):W184-7	GPS: a comprehensive www server for phosphorylation sites prediction.	http://gps.biocuckoo.org/	http://973-proteinweb.ustc.edu.cn/gps/gps_web/.	http://gps.biocuckoo.org/	1	2017:2:7:11:44:24	200	OK
15980452	2005	Nucleic Acids Res	9.202	40	Europe	PMC1160145	10.1093/nar/gki384	33(Web Server issue):W188-92	TMB-Hunt: a web server to screen sequence sets for transmembrane beta-barrel proteins.	www.bioinformatics.leeds.ac.uk/betaBarrel	www.bioinformatics.leeds.ac.uk/betaBarrel, allows sc	NA	1	2017:2:7:11:44:25	200	OK
15980453	2005	Nucleic Acids Res	9.202	15	Asia	PMC1160121	10.1093/nar/gki360	33(Web Server issue):W193-7	Web-based toolkits for topology prediction of transmembrane helical proteins, fold recognition, structure and binding scoring, folding-kinetics analysis and comparative analysis of domain combinations.	http://theory.med.buffalo.edu:	http://theory.med.buffalo.edu:: THUMBUP,	NA	0	2017:2:7:11:44:25	400	Bad Request
15980454	2005	Nucleic Acids Res	9.202	11	Europe	PMC1160201	10.1093/nar/gki440	33(Web Server issue):W198-201	TRAMPLE: the transmembrane protein labelling environment.	http://gpcr.biocomp.unibo.it/biodec/	http://gpcr.biocomp.unibo.it/biodec/) is a web	NA	1	2017:2:7:11:44:25	200	OK
15980458	2005	Nucleic Acids Res	9.202	197	Asia	PMC1160232	10.1093/nar/gki471	33(Web Server issue):W226-9	KinasePhos: a web tool for identifying protein kinase-specific phosphorylation sites.	http://KinasePhos.mbc.nctu.edu.tw/	http://KinasePhos.mbc.nctu.edu.tw/.	NA	1	2017:2:7:11:44:25	200	OK
15980459	2005	Nucleic Acids Res	9.202	141	North Am	PMC1160173	10.1093/nar/gki412	33(Web Server issue):W230-2	DiANNA: a web server for disulfide connectivity prediction.	http://clavius.bc.edu/~clotelab/DiANNA/	http://clavius.bc.edu/~clotelab/DiANNA/ outputs t:	NA	1	2017:2:7:11:44:28	200	OK
15980460	2005	Nucleic Acids Res	9.202	61	Europe	PMC1160166	10.1093/nar/gki405	33(Web Server issue):W239-43	REPPER--repeats and their periodicities in fibrous proteins.	http://protevo.eb.tuebingen.mpg.de/repper	http://protevo.eb.tuebingen.mpg.de/repper.	NA	0	2017:2:7:11:44:28	404	Not Found
15980461	2005	Nucleic Acids Res	9.202	1320	Europe	PMC1160169	10.1093/nar/gki408	33(Web Server issue):W244-8	The HHpred interactive server for protein homology detection and structure prediction.	http://protevo.eb.tuebingen.mpg.de/hhpred	http://protevo.eb.tuebingen.mpg.de/hhpred.	NA	0	2017:2:7:11:44:28	404	Not Found
15980465	2005	Nucleic Acids Res	9.202	26	Asia	PMC1160256	10.1093/nar/gki496	33(Web Server issue):W255-61	QuasiMotiFinder: protein annotation by searching for evolutionarily conserved motif-like patterns.	http://quasimotifinder.tau.ac.il/	http://quasimotifinder.tau.ac.il/), which is	NA	1	2017:2:7:11:44:28	200	OK
15980466	2005	Nucleic Acids Res	9.202	52	North Am	PMC1160129	10.1093/nar/gki368	33(Web Server issue):W262-6	PatMatch: a program for finding patterns in peptide and nucleotide sequences.	http://www.arabidopsis.org/cgi-bin/patmatch/nph-patmatch.pl	http://www.arabidopsis.org/cgi-bin/patmatch/nph-patmatch.pl for searc:	NA	1	2017:2:7:11:44:28	200	OK
15980468	2005	Nucleic Acids Res	9.202	9	Asia	PMC1160253	10.1093/nar/gki493	33(Web Server issue):W274-6	SCANMOT: searching for similar sequences using a simultaneous scan of multiple sequence motifs.	http://www.ncbs.res.in/~faculty/mini/scanmot/scanmot.html	http://www.ncbs.res.in/~faculty/mini/scanmot/scanmot.html.	NA	0	2017:2:7:11:44:30	404	Not Found
15980471	2005	Nucleic Acids Res	9.202	340	North Am	PMC1160179	10.1093/nar/gki418	33(Web Server issue):W284-8	FFAS03: a server for profile--profile sequence alignments.	http://ffas.burnham.org	http://ffas.burnham.org.	NA	1	2017:2:7:11:44:32	200	OK
15980473	2005	Nucleic Acids Res	9.202	19	South Am	PMC1160158	10.1093/nar/gki397	33(Web Server issue):W29-35	The Diamond STING server.	http://trantor.bioc.columbia.edu/SMS	http://trantor.bioc.columbia.edu/SMS.	NA	0	2017:2:7:11:44:32	500	Can't connect to trantor.bioc.columbia.edu:443
15980477	2005	Nucleic Acids Res	9.202	74	Europe	PMC1160170	10.1093/nar/gki409	33(Web Server issue):W303-5	SRide: a server for identifying stabilizing residues in proteins.	http://sride.enzim.hu	http://sride.enzim.hu.	NA	1	2017:2:7:11:44:33	200	OK
15980478	2005	Nucleic Acids Res	9.202	387	Europe	PMC1160136	10.1093/nar/gki375	33(Web Server issue):W306-10	I-Mutant2.0: predicting stability changes upon mutation from the protein sequence or structure.	http://gpcr.biocomp.unibo.it/cgi/predictors/I-Mutant2.0/I-Mutant2.0.cgi	http://gpcr.biocomp.unibo.it/cgi/predictors/I-Mutant2.0/I-Mutant2.0.cgi.	NA	1	2017:2:7:11:44:33	200	OK
15980482	2005	Nucleic Acids Res	9.202	14	North Am	PMC1160162	10.1093/nar/gki401	33(Web Server issue):W324-5	BIOVERSE: enhancements to the framework for structural, functional and contextual modeling of proteins and proteomes.	http://bioverse.compbio.washington.edu	http://bioverse.compbio.washington.edu). In this u:	NA	0	2017:2:7:11:44:33	500	read timeout
15980483	2005	Nucleic Acids Res	9.202	55	Europe	PMC1160198	10.1093/nar/gki437	33(Web Server issue):W326-30	Metabolic PathFinding: inferring relevant pathways in biochemical networks.	http://www.scmbb.ulb.ac.be/pathfinding/	http://www.scmbb.ulb.ac.be/pathfinding/).	NA	0	2017:2:7:11:44:53	500	read timeout
15980485	2005	Nucleic Acids Res	9.202	23	Europe	PMC1160130	10.1093/nar/gki369	33(Web Server issue):W342-6	POPSCOMP: an automated interaction analysis of biomolecular complexes.	https://mathbio.crick.ac.uk/wiki/POPSCOMP	http://ibivu.cs.vu.nl/programs/popscompwww/.	https://mathbio.crick.ac.uk/wiki/POPSCOMP	1	2017:2:7:11:45:13	200	OK
15980488	2005	Nucleic Acids Res	9.202	13	North Am	PMC1160245	10.1093/nar/gki485	33(Web Server issue):W358-62	MovieMaker: a web server for rapid rendering of protein motions and interactions.	http://wishart.biology.ualberta.ca/moviemaker	http://wishart.biology.ualberta.ca/moviemaker.	NA	1	2017:2:7:11:45:14	200	OK
15980489	2005	Nucleic Acids Res	9.202	569	Europe	PMC1160171	10.1093/nar/gki410	33(Web Server issue):W36-8	Protein structure prediction servers at University College London.	http://bioinf.cs.ucl.ac.uk/software.html	http://bioinf.cs.ucl.ac.uk/software.html.	NA	0	2017:2:7:11:45:14	404	Not Found
15980491	2005	Nucleic Acids Res	9.202	430	North Am	PMC1160225	10.1093/nar/gki464	33(Web Server issue):W368-71	H++: a server for estimating pKas and adding missing hydrogens to macromolecules.	http://biophysics.cs.vt.edu/H++	http://biophysics.cs.vt.edu/H++ provides	NA	1	2017:2:7:11:45:15	200	OK
15980494	2005	Nucleic Acids Res	9.202	533	Europe	PMC1160148	10.1093/nar/gki387	33(Web Server issue):W382-8	The FoldX web server: an online force field.	http://foldx.embl.de/	http://foldx.embl.de/. The curre:	NA	1	2017:2:7:11:45:16	200	OK
15980501	2005	Nucleic Acids Res	9.202	36	North Am	PMC1160252	10.1093/nar/gki492	33(Web Server issue):W412-6	WordSpy: identifying transcription factor binding motifs by building a dictionary and learning a grammar.	http://cic.cs.wustl.edu/wordspy	http://cic.cs.wustl.edu/wordspy.	NA	1	2017:2:7:11:45:17	200	OK
15980503	2005	Nucleic Acids Res	9.202	NA	NA	PMC1160174	10.1093/nar/gki413	33(Web Server issue):W423-6	PromoterPlot: a graphical display of promoter similarities by pattern recognition.	http://promoterplot.fmi.ch	http://promoterplot.fmi.ch) is a web-:	NA	0	2017:2:7:11:45:18	503	Service Unavailable
15980507	2005	Nucleic Acids Res	9.202	26	Europe	PMC1160237	10.1093/nar/gki477	33(Web Server issue):W44-9	RPBS: a web resource for structural bioinformatics.	http://bioserv.rpbs.jussieu.fr/SpecificServices.html	http://bioserv.rpbs.jussieu.fr/SpecificServices.html.	NA	0	2017:2:7:11:45:18	404	Not Found
15980509	2005	Nucleic Acids Res	9.202	17	Europe	PMC1160139	10.1093/nar/gki378	33(Web Server issue):W447-50	CONREAL web server: identification and visualization of conserved transcription factor binding sites.	http://conreal.niob.knaw.nl	http://conreal.niob.knaw.nl.	NA	1	2017:2:7:11:45:18	200	OK
15980510	2005	Nucleic Acids Res	9.202	239	North Am	PMC1160247	10.1093/nar/gki487	33(Web Server issue):W451-4	GeneMark: web software for gene finding in prokaryotes, eukaryotes and viruses.	http://opal.biology.gatech.edu/GeneMark/	http://opal.biology.gatech.edu/GeneMark/). The websi:	NA	1	2017:2:7:11:45:18	200	OK
15980511	2005	Nucleic Acids Res	9.202	125	North Am	PMC1160269	10.1093/nar/gki593	33(Web Server issue):W455-9	BASys: a web server for automated bacterial genome annotation.	http://wishart.biology.ualberta.ca/basys	http://wishart.biology.ualberta.ca/basys.	NA	1	2017:2:7:11:45:19	200	OK
15980513	2005	Nucleic Acids Res	9.202	160	Europe	PMC1160219	10.1093/nar/gki458	33(Web Server issue):W465-7	AUGUSTUS: a web server for gene prediction in eukaryotes that allows user-defined constraints.	http://augustus.gobics.de/submission	http://augustus.gobics.de/submission.	NA	1	2017:2:7:11:45:20	200	OK
15980514	2005	Nucleic Acids Res	9.202	13	Europe	PMC1160224	10.1093/nar/gki463	33(Web Server issue):W468-70	Integrating protein annotation resources through the Distributed Annotation System.	http://www.ebi.ac.uk/das-srv/uniprot/das	http://www.ebi.ac.uk/das-srv/uniprot/das) at the Eu:	NA	0	2017:2:7:11:45:20	404	Not Found
15980516	2005	Nucleic Acids Res	9.202	85	North Am	PMC1160133	10.1093/nar/gki372	33(Web Server issue):W480-2	nsSNPAnalyzer: identifying disease-associated nonsynonymous single nucleotide polymorphisms.	http://snpanalyzer.uthsc.edu/	http://snpanalyzer.utmem.edu/.	http://snpanalyzer.uthsc.edu/	1	2017:2:7:11:45:20	200	OK
15980523	2005	Nucleic Acids Res	9.202	12	North Am	PMC1160214	10.1093/nar/gki453	33(Web Server issue):W506-11	AMOD: a morpholino oligonucleotide selection tool.	http://www.secretomes.umn.edu/AMOD/	http://www.secretomes.umn.edu/AMOD/.	NA	0	2017:2:7:11:45:21	500	Can't connect to www.secretomes.umn.edu:80
15980528	2005	Nucleic Acids Res	9.202	10	Europe	PMC1160147	10.1093/nar/gki386	33(Web Server issue):W532-4	Multiple alignment of genomic sequences using CHAOS, DIALIGN and ABC.	http://dialign.gobics.de/chaos-dialign-submission	http://dialign.gobics.de/chaos-dialign-submission.	NA	1	2017:2:7:11:45:21	200	OK
15980531	2005	Nucleic Acids Res	9.202	54	North Am	PMC1160138	10.1093/nar/gki377	33(Web Server issue):W544-7	MuPlex: multi-objective multiplex PCR assay design.	http://genomics14.bu.edu:8080/MuPlex/MuPlex.html	http://genomics14.bu.edu::8080/MuPlex/MuPlex.html.	NA	0	2017:2:7:11:45:21	500	Can't connect to genomics14.bu.edu:8080
15980534	2005	Nucleic Acids Res	9.202	938	Europe	PMC1160113	10.1093/nar/gki352	33(Web Server issue):W557-9	PHYML Online--a web server for fast maximum likelihood-based phylogenetic inference.	http://atgc.lirmm.fr/phyml	http://atgc.lirmm.fr/phyml.	NA	1	2017:2:7:11:45:21	200	OK
15980537	2005	Nucleic Acids Res	9.202	23	Europe	PMC1160149	10.1093/nar/gki388	33(Web Server issue):W567-9	FeatureExtract--extraction of sequence annotation made easy.	http://www.cbs.dtu.dk/services/FeatureExtract/	http://www.cbs.dtu.dk/services/FeatureExtract/.	NA	1	2017:2:7:11:45:23	200	OK
15980538	2005	Nucleic Acids Res	9.202	14	South Am	PMC1160140	10.1093/nar/gki379	33(Web Server issue):W570-2	dnaMATE: a consensus melting temperature prediction server for short DNA sequences.	http://dna.bio.puc.cl/dnaMATE/index.html	http://dna.bio.puc.cl/tm.html. The stand:	http://dna.bio.puc.cl/dnaMATE/indeNA.html	1	2017:2:7:11:45:23	200	OK
15980539	2005	Nucleic Acids Res	9.202	14	Europe	PMC1160185	10.1093/nar/gki424	33(Web Server issue):W573-6	Stitchprofiles.uio.no: analysis of partly melted DNA conformations using stitch profiles.	http://stitchprofiles.uio.no	http://stitchprofiles.uio.no.	NA	1	2017:2:7:11:45:25	200	OK
15980540	2005	Nucleic Acids Res	9.202	NA	NA	PMC1160267	10.1093/nar/gki591	33(Web Server issue):W577-81	DINAMelt web server for nucleic acid melting prediction.	http://unafold.rna.albany.edu/?q=DINAMelt	http://www.bioinfo.rpi.edu/applications/hybrid/.	http://unafold.rna.albany.edu/?q=DINAMelt	1	2017:2:7:11:45:25	200	OK
15980544	2005	Nucleic Acids Res	9.202	24	North Am	PMC1160230	10.1093/nar/gki469	33(Web Server issue):W596-9	GEMS: a web server for biclustering analysis of expression data.	http://genomics10.bu.edu/terrence/gems/	http://genomics10.bu.edu/terrence/gems/.	NA	0	2017:2:7:11:45:25	500	Can't connect to genomics10.bu.edu:443 (certificate verify failed)
15980545	2005	Nucleic Acids Res	9.202	11	North Am	PMC1160143	10.1093/nar/gki382	33(Web Server issue):W600-4	RNALOSS: a web server for RNA locally optimal secondary structures.	http://clavius.bc.edu/~clotelab/RNALOSS/	http://clavius.bc.edu/~clotelab/RNALOSS/.	NA	1	2017:2:7:11:45:26	200	OK
15980546	2005	Nucleic Acids Res	9.202	121	Europe	PMC1160208	10.1093/nar/gki447	33(Web Server issue):W605-10	Kinefold web server for RNA/DNA folding path and structure prediction including pseudoknots and knots.	http://kinefold.curie.fr/	http://kinefold.curie.fr/.	NA	1	2017:2:7:11:45:26	200	OK
15980551	2005	Nucleic Acids Res	9.202	91	Europe	PMC1160152	10.1093/nar/gki391	33(Web Server issue):W633-7	PathwayExplorer: web service for visualizing high-throughput expression data on biological pathways.	http://genome.tugraz.at/pathwayexplorer/pathwayexplorer_description.shtml	NA	http://genome.tugraz.at/pathwayeNAplorer/pathwayeNAplorer_description.shtml	1	2017:2:7:11:45:26	200	OK
15980554	2005	Nucleic Acids Res	9.202	12	Europe	PMC1160216	10.1093/nar/gki455	33(Web Server issue):W65-71	PAT: a protein analysis toolkit for integrated biocomputing on the web.	http://pat.cbs.cnrs.fr	http://pat.cbs.cnrs.fr.	NA	1	2017:2:7:11:45:26	200	OK
15980555	2005	Nucleic Acids Res	9.202	47	Europe	PMC1160234	10.1093/nar/gki473	33(Web Server issue):W650-3	The FOLDALIGN web server for pairwise structural RNA alignment and mutual motif search.	http://foldalign.kvl.dk	http://foldalign.kvl.dk.	NA	1	2017:2:7:11:45:26	200	OK
15980557	2005	Nucleic Acids Res	9.202	19	Asia	PMC1160207	10.1093/nar/gki446	33(Web Server issue):W659-64	ASIAN: a web server for inferring a regulatory network framework from gene expression profiles.	http://eureka.ims.u-tokyo.ac.jp/asian	http://eureka.ims.u-tokyo.ac.jp/asian). GGM is ba:	NA	0	2017:2:7:11:45:26	500	Can't connect to eureka.ims.u-tokyo.ac.jp:80
15980560	2005	Nucleic Acids Res	9.202	16	North Am	PMC1160240	10.1093/nar/gki480	33(Web Server issue):W673-6	GBA server: EST-based digital gene expression profiling.	http://gba.cbi.pku.edu.cn	http://gba.cbi.pku.edu.cn.	NA	0	2017:2:7:11:45:27	500	Can't connect to gba.cbi.pku.edu.cn:80
15980564	2005	Nucleic Acids Res	9.202	84	North Am	PMC1160206	10.1093/nar/gki445	33(Web Server issue):W690-2	RibEx: a web server for locating riboswitches and other conserved bacterial regulatory elements.	http://www.ibt.unam.mx/biocomputo/ribex.html	http://www.ibt.unam.mx/biocomputo/ribex.html.	NA	1	2017:2:7:11:45:27	200	OK
15980566	2005	Nucleic Acids Res	9.202	160	Europe	PMC1160125	10.1093/nar/gki364	33(Web Server issue):W696-700	MicroInspector: a web tool for detection of miRNA binding sites in an RNA sequence.	http://www.imbb.forth.gr/microinspector	http://www.imbb.forth.gr/microinspector.	NA	0	2017:2:7:11:45:28	403	Forbidden
15980567	2005	Nucleic Acids Res	9.202	222	North Am	PMC1160144	10.1093/nar/gki383	33(Web Server issue):W701-4	miRU: an automated plant miRNA target prediction server.	http://bioinfo3.noble.org/miRU.htm	http://bioinfo3.noble.org/miRU.htm.	NA	1	2017:2:7:11:45:28	200	OK
15980568	2005	Nucleic Acids Res	9.202	11	Europe	PMC1160199	10.1093/nar/gki438	33(Web Server issue):W705-9	AISMIG--an interactive server-side molecule image generator.	http://www.dkfz-heidelberg.de/spec/aismig/	http://www.dkfz-heidelberg.de/spec/aismig/.	NA	0	2017:2:7:11:45:28	404	Not Found
15980569	2005	Nucleic Acids Res	9.202	17	Europe	PMC1160161	10.1093/nar/gki400	33(Web Server issue):W710-6	BRIGEP--the BRIDGE-based genome-transcriptome-proteome browser.	https://www.cebitec.uni-bielefeld.de/groups/brf/software/brigep/	https//www.cebitec.uni-bielefeld.de/groups/brf/software/brigep/. Code bund:	NA	1	2017:2:7:11:45:29	200	OK
15980570	2005	Nucleic Acids Res	9.202	46	Europe	PMC1160215	10.1093/nar/gki454	33(Web Server issue):W717-23	GFINDer: genetic disease and phenotype location statistical analysis and mining of dynamically annotated gene lists.	http://www.bioinformatics.polimi.it/GFINDer/	http://www.bioinformatics.polimi.it/GFINDer/.	NA	0	2017:2:7:11:45:30	500	read timeout
15980571	2005	Nucleic Acids Res	9.202	439	North Am	PMC1160157	10.1093/nar/gki396	33(Web Server issue):W72-6	SCRATCH: a protein structure and structural feature prediction server.	http://www.igb.uci.edu/servers/psss.html	http://www.igb.uci.edu/servers/psss.html.	NA	1	2017:2:7:11:45:50	200	OK
15980578	2005	Nucleic Acids Res	9.202	71	Europe	PMC1160196	10.1093/nar/gki435	33(Web Server issue):W758-61	GeneSeeker: extraction and integration of human disease-related information from web-based genetic databases.	http://www.cmbi.ru.nl/GeneSeeker/	http://www.cmbi.ru.nl/GeneSeeker/), a web ser:	NA	1	2017:2:7:11:45:51	200	OK
15980580	2005	Nucleic Acids Res	9.202	18	Europe	PMC1160183	10.1093/nar/gki422	33(Web Server issue):W766-9	MRS: a fast and compact retrieval system for biological data.	http://mrs.cmbi.ru.nl	http://mrs.cmbi.ru.nl/download/ for those:	http://mrs.cmbi.ru.nl	1	2017:2:7:11:45:51	200	OK
15980581	2005	Nucleic Acids Res	9.202	47	North Am	PMC1160164	10.1093/nar/gki403	33(Web Server issue):W77-80	PROTINFO: new algorithms for enhanced protein structure predictions.	http://protinfo.compbio.washington.edu	http://protinfo.compbio.washington.edu.	NA	0	2017:2:7:11:45:51	500	read timeout
15980585	2005	Nucleic Acids Res	9.202	266	Europe	PMC1160231	10.1093/nar/gki470	33(Web Server issue):W783-6	GoPubMed: exploring PubMed with the Gene Ontology.	www.gopubmed.org	www.gopubmed.org. Querying	NA	1	2017:2:7:11:46:11	200	OK
15980587	2005	Nucleic Acids Res	9.202	8	Asia	PMC1160114	10.1093/nar/gki353	33(Web Server issue):W85-8	Fragment Finder: a web-based software to identify similar three-dimensional structural motif.	http://cluster.physics.iisc.ernet.in/ff/	http://cluster.physics.iisc.ernet.in/ff/ or http:::	NA	1	2017:2:7:11:46:12	200	OK
15980588	2005	Nucleic Acids Res	9.202	351	Europe	PMC1160175	10.1093/nar/gki414	33(Web Server issue):W89-93	ProFunc: a server for predicting protein function from 3D structure.	http://www.ebi.ac.uk/thornton-srv/databases/ProFunc	http://www.ebi.ac.uk/thornton-srv/databases/ProFunc) is a web	NA	1	2017:2:7:11:46:12	200	OK
15980589	2005	Nucleic Acids Res	9.202	179	North Am	PMC1160163	10.1093/nar/gki402	33(Web Server issue):W94-8	PISCES: recent improvements to a PDB sequence culling server.	http://dunbrack.fccc.edu/pisces	http://dunbrack.fccc.edu/pisces.	NA	1	2017:2:7:11:46:12	200	OK
15981259	2005	Proteins	2.499	81	North Am	NA	10.1002/prot.20573	60(2):296-301	Development and testing of an automated approach to protein docking.	http://www.bioinformatics.ku.edu	http://www.bioinformatics.ku.edu.	NA	1	2017:2:7:11:46:14	200	OK
15981269	2005	Proteins	2.499	122	Asia	NA	10.1002/prot.20562	60(2):224-31	Geometry-based flexible and symmetric protein docking.	http://bioinfo3d.cs.tau.ac.il/	http://bioinfo3d.cs.tau.ac.il/).	NA	1	2017:2:7:11:46:16	200	OK
15987530	2005	BMC Bioinformatics	2.435	6	Europe	PMC1182352	10.1186/1471-2105-6-164	0.363889	Species-specific analysis of protein sequence motifs using mutual information.	http://promi.mpimp-golm.mpg.de	http://promi.mpimp-golm.mpg.de where add:	NA	1	2017:2:7:11:46:17	200	OK
15987883	2005	Protein Sci	3.039	43	Europe	PMC2279325	10.1110/ps.051352405	14(8):2132-40	Integrated modeling of the major events in the MHC class I antigen processing pathway.	http://abi.inf.uni-tuebingen.de/Services/WAPP	http://www-bs.informatik.uni-tuebingen.de/WAPP	http://abi.inf.uni-tuebingen.de/Services/WAPP	1	2017:2:7:11:46:17	200	OK
15988830	2005	Nucleic Acids Res	9.202	53	Asia	PMC1160264	10.1093/nar/gki588	33(Web Server issue):W154-9	BhairPred: prediction of beta-hairpins in a protein from multiple alignment information using ANN and SVM techniques.	http://www.imtech.res.in/raghava/bhairpred/	http://www.imtech.res.in/raghava/bhairpred/), has been	NA	1	2017:2:7:11:46:17	200	OK
15988831	2005	Nucleic Acids Res	9.202	50	Asia	PMC1160263	10.1093/nar/gki587	33(Web Server issue):W202-7	Pcleavage: an SVM based method for prediction of constitutive proteasome and immunoproteasome cleavage sites in antigenic sequences.	http://bioinformatics.uams.edu/mirror/pcleavage/	http://bioinformatics.uams.edu/mirror/pcleavage/.	NA	0	2017:2:7:11:46:18	500	read timeout
15991337	2005	Nucleic Acids Res	9.202	56	Asia	PMC1160262	10.1093/nar/gki586	33(Web Server issue):W233-8	MEDock: a web server for efficient prediction of ligand binding sites based on a novel optimization algorithm.	http://bioinfo.mc.ntu.edu.tw/medock/	http://bioinfo.mc.ntu.edu.tw/medock/.	NA	1	2017:2:7:11:46:38	200	OK
15991338	2005	Nucleic Acids Res	9.202	NA	Europe	PMC1160265	10.1093/nar/gki589	33(Web Server issue):W271-3	SVC: structured visualization of evolutionary sequence conservation.	http://svc.molgen.mpg.de	http://svc.molgen.mpg.de.	NA	0	2017:2:7:11:46:40	500	Can't connect to svc.molgen.mpg.de:80
15991339	2005	Nucleic Acids Res	9.202	131	Asia	PMC1160261	10.1093/nar/gki585	33(Web Server issue):W331-6	PRISM: protein interactions by structural matching.	http://cosbi.ku.edu.tr/prism/	http://gordion.hpc.eng.ku.edu.tr/prism) is a webs:	http://cosbi.ku.edu.tr/prism/	1	2017:2:7:11:46:40	200	OK
15992409	2005	BMC Bioinformatics	2.435	254	Europe	PMC1182353	10.1186/1471-2105-6-167	0.365972	Prediction of twin-arginine signal peptides.	http://www.cbs.dtu.dk/services/TatP/	http://www.cbs.dtu.dk/services/TatP/.	NA	1	2017:2:7:11:46:40	200	OK
15994188	2005	Bioinformatics	5.766	30	Asia	NA	10.1093/bioinformatics/bti568	21(17):3501-8	A heuristic approach for detecting RNA H-type pseudoknots.	http://genome.cs.nthu.edu.tw/HPKNOTTER/	http://bioalgorithm.life.nctu.edu.tw/HPKNOTTER/ CONTACT:	http://genome.cs.nthu.edu.tw/HPKNOTTER/	1	2017:2:7:11:46:40	200	OK
15994193	2005	Bioinformatics	5.766	4	Asia	NA	10.1093/bioinformatics/bti561	21(17):3570-1	P-cats: prediction of catalytic residues in proteins from their tertiary structures.	http://p-cats.hgc.jp/p-cats	http://p-cats.hgc.jp/p-cats CONTACT::	NA	0	2017:2:7:11:46:42	500	Can't connect to p-cats.hgc.jp:80
16002049	2005	Biochem Biophys Res Commun	NA	134	North Am	NA	10.1016/j.bbrc.2005.06.087	334(1):288-92	Using optimized evidence-theoretic K-nearest neighbor classifier and pseudo-amino acid composition to predict membrane protein types.	http://www.pami.sjtu.edu.cn/kcchou	http://www.pami.sjtu.edu.cn/kcchou.	NA	0	2017:2:7:11:46:42	500	read timeout
16020471	2005	Bioinformatics	5.766	63	Asia	NA	10.1093/bioinformatics/bti582	21(18):3615-21	SPEM: improving multiple sequence alignment with sequence profiles and predicted secondary structures.	http://theory.med.buffalo.edu	http://theory.med.buffalo.edu.	NA	0	2017:2:7:11:47:3	500	read timeout
16020472	2005	Bioinformatics	5.766	69	Europe	NA	10.1093/bioinformatics/bti577	21(17):3516-23	Consensus shapes: an alternative to the Sankoff algorithm for RNA consensus structure prediction.	http://bibiserv.techfak.uni-bielefeld.de/rnacast/supplementary.html	http://bibiserv.techfak.uni-bielefeld.de/rnacast/supplementary.html	NA	1	2017:2:7:11:47:23	200	OK
16039905	2006	Tuberculosis (Edinb)	NA	56	Asia	NA	10.1016/j.tube.2005.05.001	86(2):115-24	ProPred analysis and experimental evaluation of promiscuous T-cell epitopes of three major secreted antigens of Mycobacterium tuberculosis.	http:www.imtech.res.in/raghava/ProPed/	http::www.imtech.res.in/raghava/ProPed/). The pepti:	NA	0	2017:2:7:11:47:23	500	No Host option provided
16043502	2005	RNA	NA	171	North Am	PMC1370799	10.1261/rna.2500605	11(8):1157-66	RNA secondary structure prediction by centroids in a Boltzmann weighted ensemble.	http://sfold.wadsworth.org	http://sfold.wadsworth.org.	NA	1	2017:2:7:11:47:23	200	OK
16078362	2005	J Bioinform Comput Biol	0.831	35	Asia	NA	10.1142/S0219720005001302	3(4):803-19	Protein structure and fold prediction using Tree-Augmented naÄ†Ëťve Bayesian classifier.	http://www-appn.comp.nus.edu.sg/~bioinfo/bayesprot/Default.htm	http://www-appn.comp.nus.edu.sg/~bioinfo/bayesprot/Default.htm. More deta:	NA	0	2017:2:7:11:47:23	503	Service Unavailable
16087736	2005	Nucleic Acids Res	9.202	48	Europe	PMC1183489	10.1093/nar/gki730	33(14):4496-506	Refinement of docked protein-ligand and protein-DNA structures using low frequency normal mode amplitude optimization.	http://lorentz.immstr.pasteur.fr	http://lorentz.immstr.pasteur.fr.	NA	1	2017:2:7:11:47:24	200	OK
16094535	2005	J Mol Model	1.438	8	Europe	NA	10.1007/s00894-005-0235-z	11(6):431-8	Molecular modeling of phosphorylation sites in proteins using a database of local structure segments.	http://ffas.ljcrf.edu/Servers/frag.html	http://ffas.ljcrf.edu/Servers/frag.html . The alg:	NA	0	2017:2:7:11:47:24	500	Can't connect to ffas.ljcrf.edu:80
16106377	2005	Proteins	2.499	68	Asia	NA	10.1002/prot.20630	61(2):318-24	Real value prediction of solvent accessibility in proteins using multiple sequence alignment and secondary structure.	http://www.imtech.res.in/raghava/sarpred/	http://www.imtech.res.in/raghava/sarpred/) has been	NA	1	2017:2:7:11:47:24	200	OK
16109749	2005	Bioinformatics	5.766	42	North Am	NA	10.1093/bioinformatics/bti632	21(20):3926-8	Structure clustering features on the Sfold Web server.	http://www.bioinfo.rpi.edu/applications/sfold	http://www.bioinfo.rpi.edu/applications/sfold CONTACT::	NA	0	2017:2:7:11:47:24	404	Not Found
16115313	2005	BMC Genet	2.152	107	North Am	PMC1208881	10.1186/1471-2156-6-45	06:45:00	G2D: a tool for mining genes associated with disease.	http://www.ogic.ca/projects/g2d_2/	http://www.ogic.ca/projects/g2d_2/.	NA	1	2017:2:7:11:47:24	200	OK
16122378	2005	BMC Bioinformatics	2.435	42	Asia	PMC1236910	10.1186/1471-2105-6-207	0.39375	A protein domain interaction interface database: InterPare.	http://interpare.net	http://interpare.net. It contai:	NA	1	2017:2:7:11:47:25	200	OK
16123115	2005	Bioinformatics	5.766	30	North Am	NA	10.1093/bioinformatics/bti629	21(22):4107-15	Calibrating E-values for hidden Markov models using reverse-sequence null models.	http://www.soe.ucsc.edu/research/compbio/gen_sequence	http://www.soe.ucsc.edu/research/compbio/gen_sequence	NA	1	2017:2:7:11:47:25	200	OK
16128616	2005	Appl Bioinformatics	NA	4	Asia	NA	10.2165/00822942-200504020-00008	4(2):141-5	PSST-2.0: Protein Data Bank Sequence Search Tool.	http://pranag.physics.iisc.ernet.in/psst/	http://pranag.physics.iisc.ernet.in/psst/ or http::/:	NA	1	2017:2:7:11:47:28	200	OK
16128617	2005	Appl Bioinformatics	NA	2	Asia	NA	10.2165/00822942-200504020-00009	4(2):147-50	ProLysED: an integrated database and meta-server of bacterial protease systems.	http://genome.ukm.my/prolyses/	http://genome.ukm.my/prolyses/. Access to:	NA	0	2017:2:7:11:47:29	500	Can't connect to genome.ukm.my:80
16141250	2005	Bioinformatics	5.766	59	Europe	NA	10.1093/bioinformatics/bti645	21(20):3929-30	The SuMo server: 3D search for protein functional sites.	http://sumo-pbil.ibcp.fr	http://sumo-pbil.ibcp.fr and full	NA	0	2017:2:7:11:47:29	500	read timeout
16152601	2005	Proteins	2.499	20	Asia	NA	10.1002/prot.20645	61(3):473-80	Predicting protein secondary structure and solvent accessibility with an improved multiple linear regression method.	http://spg.biosci.tsinghua.edu.cn/	http://spg.biosci.tsinghua.edu.cn/.	NA	0	2017:2:7:11:47:49	500	Can't connect to spg.biosci.tsinghua.edu.cn:80
16153186	2005	In Silico Biol	NA	6	Europe	NA	NA	5(3):341-6	In silico simulation of fingerprinting techniques based on double endonuclease digestion of genomic DNA.	http://www.in-silico.com/DDF/	http://www.in-silico.com/DDF/.	NA	0	2017:2:7:11:47:59	404	Not Found
16160274	2005	Stud Health Technol Inform	NA	3	Europe	NA	NA	116:290-5	Trends in free WWW-based E-learning Modules seen from the Learning Resource Server Medicine (LRSMed).	http://www.lrsmed.de/	http://mmedia.medizin.uni-essen.de/portal/. With the	http://www.lrsmed.de/	1	2017:2:7:11:48:0	200	OK
16184518	2005	Proteins	2.499	39	North Am	NA	10.1002/prot.20580	61(1):6-20	Generation and analysis of a protein-protein interface data set with similar chemical and spatial patterns of interactions.	http://bioinfo3d.cs.tau.ac.il/I2I-SiteEngine]	http://bioinfo3d.cs.tau.ac.il/I2I-SiteEngine]. The algor:	NA	0	2017:2:7:11:48:0	404	Not Found
16187357	2005	Proteins	2.499	48	Asia	NA	10.1002/prot.20732	61 Suppl 7:152-6	SPARKS 2 and SP3 servers in CASP6.	http://theory.med.buffalo.edu	http://theory.med.buffalo.edu.	NA	0	2017:2:7:11:48:0	500	read timeout
16187358	2005	Proteins	2.499	107	North Am	NA	10.1002/prot.20733	61 Suppl 7:157-66	Prediction of CASP6 structures using automated Robetta protocols.	http://robetta.bakerlab.org/	http://robetta.bakerlab.org/ that uses:	NA	1	2017:2:7:11:48:20	200	OK
16195354	2005	Mol Biol Cell	4.037	63	Europe	PMC1289417	10.1091/mbc.E05-06-0508	16(12):5736-48	Sequence and comparative genomic analysis of actin-related proteins.	http://bips.u-strasbg.fr/ARPAnno	http://bips.u-strasbg.fr/ARPAnno), a new web:	NA	0	2017:2:7:11:48:20	404	Not Found
16204124	2005	Bioinformatics	5.766	50	Asia	NA	10.1093/bioinformatics/bti1108	21 Suppl 2:ii47-53	ARTS: alignment of RNA tertiary structures.	http://bioinfo3d.cs.tau.ac.il/ARTS	http://bioinfo3d.cs.tau.ac.il/ARTS	NA	1	2017:2:7:11:48:20	200	OK
16204344	2005	Bioinformatics	5.766	68	Europe	NA	10.1093/bioinformatics/bti702	21(23):4248-54	Pcons5: combining consensus, structural evaluation and fold recognition scores.	http://www.sbc.su.se/~bjorn/Pcons5	http://www.sbc.su.se/~bjorn/Pcons5. It should:	NA	1	2017:2:7:11:48:21	200	OK
16211510	2005	J Struct Funct Genomics	NA	11	North Am	NA	10.1007/s10969-005-2898-1	6(2-3):135-41	High-throughput protein production for X-ray crystallography and use of size exclusion chromatography to validate or refute computational biological unit predictions.	http://pqs.ebi.ac.uk/	http://pqs.ebi.ac.uk/) were comp:	NA	1	2017:2:7:11:48:22	200	OK
16221304	2005	BMC Bioinformatics	2.435	34	Europe	PMC1280922	10.1186/1471-2105-6-247	0.421528	Phydbac Gene Function Predictor: a gene annotation tool based on genomic context analysis.	http://www.igs.cnrs-mrs.fr/phydbac/indexPS.html	http://www.igs.cnrs-mrs.fr/phydbac/indexPS.html.	NA	0	2017:2:7:11:48:22	404	Not Found
16231203	2005	J Comput Aided Mol Des	NA	779	Europe	NA	10.1007/s10822-005-8694-y	19(6):453-63	Virtual computational chemistry laboratory--design and description.	http://www.vcclab.org	http://www.vcclab.org, allowing	NA	1	2017:2:7:11:48:22	200	OK
16248433	2005	Sci China C Life Sci	NA	7	Asia	NA	10.1360/062004-53	48(4):394-405	A seqlet-based maximum entropy Markov approach for protein secondary structure prediction.	http://www.insun.hit.edu.cn:81/demos/biology/index.html	http://www.insun.hit.edu.cn::81/demos/biology/index.html.	NA	0	2017:2:7:11:48:23	500	Can't connect to www.insun.hit.edu.cn:81
16258624	2005	Braz J Med Biol Res	1.146	1	South Am	NA	/S0100-879X2005001100002	38(11):1571-4	The GATO gene annotation tool for research laboratories.	http://mariwork.iq.usp.br/gato/	http://mariwork.iq.usp.br/gato/]. Minimum c:	NA	0	2017:2:7:11:48:43	500	Can't connect to mariwork.iq.usp.br:80
16267083	2006	Bioinformatics	5.766	45	Europe	NA	10.1093/bioinformatics/bti751	22(2):181-7	SSEP-Domain: protein domain prediction by alignment of secondary structure elements and profiles.	http://www.bio.ifi.lmu.de/SSEP/	http://www.bio.ifi.lmu.de/SSEP/	NA	0	2017:2:7:11:48:44	404	Not Found
16268787	2005	In Silico Biol	NA	55	Asia	NA	NA	5(4):419-23	KEGG-based pathway visualization tool for complex omics data.	http://www.g-language.org/data/marray/	http://www.g-language.org/data/marray/.	NA	1	2017:2:7:11:48:44	200	OK
16269077	2005	BMC Bioinformatics	2.435	32	Europe	PMC1298287	10.1186/1471-2105-6-264	0.433333	maxdLoad2 and maxdBrowse: standards-compliant tools for microarray experimental annotation, data management and dissemination.	http://www.bioinf.man.ac.uk/microarray/maxd/	http://www.bioinf.man.ac.uk/microarray/maxd/ and maxdB:	NA	0	2017:2:7:11:48:45	404	Not Found
16270155	2005	Acta Biochim Biophys Sin (Shanghai)	NA	19	Asia	NA	10.1111/j.1745-7270.2005.00110.x	37(11):759-66	Fast fourier transform-based support vector machine for prediction of G-protein coupled receptor subfamilies.	http://chem.scu.edu.cn/blast/Pred-GPCR	NA	http://chem.scu.edu.cn/blast/Pred-GPCR	0	2017:2:7:11:48:46	404	Not Found
16278239	2006	Bioinformatics	5.766	26	North Am	NA	10.1093/bioinformatics/bti763	22(2):188-94	Residue-rotamer-reduction algorithm for the protein side-chain conformation problem.	http://eudoxus.scs.uiuc.edu/r3.html	http://eudoxus.scs.uiuc.edu/r3.html	NA	0	2017:2:7:11:48:47	500	Can't connect to eudoxus.scs.uiuc.edu:80
16289973	2006	J Mol Graph Model	1.674	31	North Am	NA	10.1016/j.jmgm.2005.09.006	24(4):296-306	A connection rule for alpha-carbon coarse-grained elastic network models using chemical bond information.	http://biomechanics.ecs.umass.edu/umms.html	http://biomechanics.ecs.umass.edu/umms.html).	NA	0	2017:2:7:11:48:47	500	Can't connect to biomechanics.ecs.umass.edu:80
16293670	2006	Bioinformatics	5.766	50	Europe	NA	10.1093/bioinformatics/bti784	22(3):303-9	Enhanced recognition of protein transmembrane domains with prediction-based structural profiles.	http://minnou.cchmc.org	http://minnou.cchmc.org.	NA	1	2017:2:7:11:48:47	200	OK
16301202	2006	Bioinformatics	5.766	19	Europe	NA	10.1093/bioinformatics/bti773	22(2):129-33	Protein Peeling': an approach for splitting a 3D protein structure into compact fragments.	http://www.ebgm.jussieu.fr/~gelly/	http://www.ebgm.jussieu.fr/~gelly/	NA	0	2017:2:7:11:48:48	500	read timeout
16306388	2005	Bioinformatics	5.766	13	North Am	NA	10.1093/bioinformatics/bti1205	21 Suppl 3:iii20-30	Incorporation of splice site probability models for non-canonical introns improves gene structure prediction in plants.	http://bioinformatics.iastate.edu/bioinformatics2go/gs/download.html	http://bioinformatics.iastate.edu/bioinformatics2go/gs/download.html. Web serve:	NA	0	2017:2:7:11:49:8	404	Not Found
16315316	2006	Proteins	2.499	56	Europe	NA	10.1002/prot.20789	62(2):343-55	Will my protein crystallize? A sequence-based predictor.	http://webclu.bio.wzw.tum.de:8080/secret	http://webclu.bio.wzw.tum.de::8080/secret.	NA	0	2017:2:7:11:49:9	500	Can't connect to webclu.bio.wzw.tum.de:8080
16320312	2006	Proteins	2.499	80	North Am	NA	10.1002/prot.20787	62(3):617-29	Large-scale prediction of disulphide bridges using kernel methods, two-dimensional recursive neural networks, and weighted graph matching.	www.igb.uci.edu/servers/psss.html	www.igb.uci.edu/servers/psss.html.	NA	1	2017:2:7:11:49:29	200	OK
16321157	2005	BMC Bioinformatics	2.435	18	North Am	PMC1325052	10.1186/1471-2105-6-287	0.449306	ArrayQuest: a web resource for the analysis of DNA microarray data.	http://proteogenomics.musc.edu/arrayquest.html	http://proteogenomics.musc.edu/arrayquest.html.	NA	0	2017:2:7:11:49:30	500	read timeout
16351743	2005	BMC Bioinformatics	2.435	8	Europe	PMC1866391	10.1186/1471-2105-6-S4-S1710.1186/1471-2105-6-S1-S17	6 Suppl 4:S17	Browsing isolated population data.	http://www.shardna.com	http://www.shardna.com.	NA	0	2017:2:7:11:49:51	500	Can't connect to www.shardna.com:80
16362822	2006	Virchows Arch	2.613	40	Europe	NA	10.1007/s00428-005-0112-2	448(3):248-55	Factors to keep in mind when introducing virtual microscopy.	http://vmic.unibas.ch	http://vmic.unibas.ch . Recentl:	NA	1	2017:2:7:11:49:51	200	OK
16371163	2005	BMC Bioinformatics	2.435	2	North Am	PMC1351202	10.1186/1471-2105-6-305	0.461806	The Gene Set Builder: collation, curation, and distribution of sets of genes.	http://www.cisreg.ca/gsb/	http://www.cisreg.ca/gsb/.	NA	1	2017:2:7:11:49:51	200	OK
16371165	2005	BMC Bioinformatics	2.435	58	North Am	PMC1327694	10.1186/1471-2105-6-306	0.4625	WebArray: an online platform for microarray data analysis.	http://www.webarraydb.org/webarray/index.html	http://bioinformatics.skcc.org/webarray/. It runs o:	http://www.webarraydb.org/webarray/indeNA.html	1	2017:2:7:11:49:51	200	OK
16372356	2006	Proteins	2.499	238	North Am	NA	10.1002/prot.20810	62(4):1125-32	Prediction of protein stability changes for single-site mutations using support vector machines.	http://www.igb.uci.edu/servers/servers.html	http://www.igb.uci.edu/servers/servers.html.	NA	1	2017:2:7:11:49:53	200	OK
16381839	2006	Nucleic Acids Res	9.202	210	Europe	PMC1347510	10.1093/nar/gkj148	34(Database issue):D169-72	MIPS: analysis and annotation of proteins from whole genomes in 2005.	http://mips.gsf.de	http://mips.gsf.de).	NA	1	2017:2:7:11:49:54	200	OK
16381864	2006	Nucleic Acids Res	9.202	12	North Am	PMC1347486	10.1093/nar/gkj124	34(Database issue):D277-80	Flexible Structural Neighborhood--a database of protein structural similarities and alignments.	http://fatcat.burnham.org/fatcat/struct_neighbor	http://fatcat.burnham.org/fatcat/struct_neighbor and by di:	NA	1	2017:2:7:11:49:54	200	OK
16381869	2006	Nucleic Acids Res	9.202	169	North Am	PMC1347422	10.1093/nar/gkj059	34(Database issue):D291-5	MODBASE: a database of annotated comparative protein structure models and associated resources.	http:/salilab.org/modeller	http::/salilab.org/modeller). MODBASE i:	NA	0	2017:2:7:11:49:55	500	No Host option provided
16381870	2006	Nucleic Acids Res	9.202	105	North Am	PMC1347409	10.1093/nar/gkj046	34(Database issue):D296-301	The Database of Macromolecular Motions: new features added at the decade mark.	http://molmovdb.org	http://molmovdb.org), has been	NA	1	2017:2:7:11:49:55	200	OK
16381884	2006	Nucleic Acids Res	9.202	3	Europe	PMC1347462	10.1093/nar/gkj100	34(Database issue):D349-53	INVHOGEN: a database of homologous invertebrate genes.	http://www.bi.uni-duesseldorf.de/~invhogen/invhogen.html	http://www.bi.uni-duesseldorf.de/~invhogen/invhogen.html.	NA	0	2017:2:7:11:49:55	503	Service Unavailable
16381909	2006	Nucleic Acids Res	9.202	43	Europe	PMC1347404	10.1093/nar/gkj041	34(Database issue):D452-5	Visualizing syntenic relationships among the hemiascomycetes with the Yeast Gene Order Browser.	http://wolfe.gen.tcd.ie/ygob	http://wolfe.gen.tcd.ie/ygob.	NA	1	2017:2:7:11:49:55	200	OK
16381980	2006	Nucleic Acids Res	9.202	92	Europe	PMC1347508	10.1093/nar/gkj146	34(Database issue):D82-5	EPD in its twentieth year: towards complete promoter coverage of selected model organisms.	http://www.epd.isb-sib.ch	http://www.epd.isb-sib.ch.	NA	0	2017:2:7:11:49:55	500	read timeout
16381982	2006	Nucleic Acids Res	9.202	15	Europe	PMC1347412	10.1093/nar/gkj049	34(Database issue):D90-4	HTPSELEX--a database of high-throughput SELEX libraries for transcription factor binding sites.	http://ccg.vital-it.ch/htpselex/	http://www.isrec.isb-sib.ch/htpselex.	http://ccg.vital-it.ch/htpseleNA/	1	2017:2:7:11:50:15	200	OK
16385554	2006	Proteins	2.499	41	North Am	NA	10.1002/prot.20854	62(4):881-91	SSALN: an alignment algorithm using structure-dependent substitution matrices and gap penalties learned from structurally aligned protein pairs.	http://www.cs.cornell.edu/~jianq/research.htm	http://www.cs.cornell.edu/ approxima:	http://www.cs.cornell.edu/~jianq/research.htm	1	2017:2:7:11:50:15	200	OK
16403789	2006	Bioinformatics	5.766	21	Europe	NA	10.1093/bioinformatics/btk041	22(6):762-4	GUUGle: a utility for fast exact matching under RNA complementary rules including G-U base pairing.	http://bibiserv.techfak.uni-bielefeld.de/guugle	http://bibiserv.techfak.uni-bielefeld.de/guugle	NA	1	2017:2:7:11:50:16	200	OK
16419070	2006	Proteins	2.499	9	North Am	NA	10.1002/prot.20874	63(1):1-5	Prediction of buried helices in multispan alpha helical membrane proteins.	http://gila.bioengr.uic.edu/lab/	http://gila.bioengr.uic.edu/lab/.	NA	0	2017:2:7:11:50:16	500	Can't connect to gila.bioengr.uic.edu:80
16423290	2006	BMC Bioinformatics	2.435	124	Europe	PMC1386716	10.1186/1471-2105-7-27	07:27:00	NOXclass: prediction of protein-protein interaction types.	http://noxclass.bioinf.mpi-inf.mpg.de/	http://noxclass.bioinf.mpi-inf.mpg.de/.	NA	1	2017:2:7:11:50:16	200	OK
16423924	2006	Bioinformatics	5.766	32	Europe	NA	10.1093/bioinformatics/btl001	22(7):900-1	REMORA: a pilot in the ocean of BioMoby web-services.	http://bioinfo.genopole-toulouse.prd.fr/remora	http://bioinfo.genopole-toulouse.prd.fr/remora, sources a	NA	0	2017:2:7:11:50:17	404	Not Found
16423925	2006	Bioinformatics	5.766	169	Europe	NA	10.1093/bioinformatics/btk031	22(6):773-4	SUSPECTS: enabling fast and effective prioritization of positional candidates.	http://www.genetics.med.ed.ac.uk/suspects/help.shtml	http://www.genetics.med.ed.ac.uk/suspects/help.shtml and Excel:	NA	1	2017:2:7:11:50:17	200	OK
16443826	2006	J Lipid Res	4.368	33	Asia	NA	10.1194/jlr.M500530-JLR200	47(4):824-31	Prediction of the functional class of lipid binding proteins from sequence-derived properties irrespective of sequence similarity.	http://jing.cz3.nus.edu.sg/cgi-bin/svmprot.cgi	http://jing.cz3.nus.edu.sg/cgi-bin/svmprot.cgi).	NA	0	2017:2:7:11:50:17	500	Can't connect to jing.cz3.nus.edu.sg:80
16446279	2006	Bioinformatics	5.766	13	Europe	NA	10.1093/bioinformatics/btl018	22(8):924-33	Capturing expert knowledge with argumentation: a case study in bioinformatics.	http://www.sbg.bio.ic.ac.uk/~brj03/argumentation/paper/	http://www.sbg.bio.ic.ac.uk/~brj03/argumentation/paper/. Source co:	NA	1	2017:2:7:11:50:18	200	OK
16452792	2003	Proc IEEE Comput Soc Bioinform Conf	NA	1	North Am	NA	NA	2:180-9	Statistical and visual morph movie analysis of crystallographic mutant selection bias in protein mutation resource data.	http://pmr.sdsc.edu	http://pmr.sdsc.edu.	NA	0	2017:2:7:11:50:18	500	Can't connect to pmr.sdsc.edu:80
16455749	2006	Bioinformatics	5.766	34	Europe	NA	10.1093/bioinformatics/btl036	22(8):1024-6	The LCB Data Warehouse.	https://dw.lcb.uu.se/index.phtml?i_login=test	https//dw.lcb.uu.se/index.phtml?i_login=test. User acco:	NA	0	2017:2:7:11:50:18	500	Can't connect to dw.lcb.uu.se:443
16455751	2006	Bioinformatics	5.766	64	North Am	NA	10.1093/bioinformatics/btl032	22(7):891-3	PROFbval: predict flexible and rigid residues in proteins.	http://www.rostlab.org/services/profbval	http://www.rostlab.org/services/profbval CONTACT::	NA	0	2017:2:7:11:50:18	404	Not Found
16456847	2006	Proteins	2.499	47	North Am	NA	10.1002/prot.20883	63(3):542-50	Two-stage support vector regression approach for predicting accessible surface areas of amino acids.	http://birc.ntu.edu.sg/~	http://birc.ntu.edu.sg/~ pas018645:	NA	0	2017:2:7:11:50:19	500	Can't connect to birc.ntu.edu.sg:80
16477622	2006	Proteins	2.499	161	North Am	NA	10.1002/prot.20897	63(4):892-906	On the nature of cavities on protein surfaces: application to the identification of drug-binding sites.	http://interface.bioc.columbia.edu/screen	http://interface.bioc.columbia.edu/screen.	NA	0	2017:2:7:11:50:19	500	Can't connect to interface.bioc.columbia.edu:80
16483358	2006	BMC Bioinformatics	2.435	50	Oceania	PMC1395342	10.1186/1471-2105-7-75	0.34375	Detecting overlapping coding sequences in virus genomes.	http://guinevere.otago.ac.nz/mlogd.html	http://guinevere.otago.ac.nz/mlogd.html.	NA	1	2017:2:7:11:50:19	200	OK
16489249	2006	Acta Crystallogr A	2.333	NA	NA	NA	10.1107/S0108767305040286	62(Pt 2):115-28	Bilbao Crystallographic Server. II. Representations of crystallographic point groups and space groups.	http://www.cryst.ehu.es	http://www.cryst.ehu.es). The serve:	NA	1	2017:2:7:11:50:24	200	OK
16503967	2006	BMC Bioinformatics	2.435	6	North Am	PMC1386715	10.1186/1471-2105-7-79	0.346528	Taxonomic colouring of phylogenetic trees of protein sequences.	http://www.ogic.ca/projects/phyloview/	http://www.ogic.ca/projects/phyloview/. A tutoria:	NA	1	2017:2:7:11:50:24	200	OK
16506242	2006	Proteins	2.499	22	North Am	NA	10.1002/prot.20932	63(4):868-77	Scoring a diverse set of high-quality docked conformations: a metascore based on electrostatic and desolvation interactions.	http://structure.pitt.edu	http://structure.pitt.edu.	NA	1	2017:2:7:11:50:24	200	OK
16512892	2006	BMC Bioinformatics	2.435	32	Europe	PMC1459204	10.1186/1471-2105-7-104	0.363889	SCOWLP: a web-based database for detailed characterization and visualization of protein interfaces.	http://www.scowlp.org	http://www.scowlp.org.	NA	1	2017:2:7:11:50:25	200	OK
16524982	2006	Plant Physiol	6.28	153	North Am	PMC1400579	10.1104/pp.105.072280	140(3):818-29	AGRIS and AtRegNet. a platform to link cis-regulatory elements and transcription factors into regulatory networks.	http://Arabidopsis.med.ohio-state.edu	http://Arabidopsis.med.ohio-state.edu.	NA	1	2017:2:7:11:50:26	200	OK
16536212	2005	Bull Hosp Jt Dis	NA	5	Europe	NA	NA	63(1-2):15-9	The Swiss Orthopaedic Registry.	www.memdoc.org	www.memdoc.org). With supp	NA	0	2017:2:7:11:50:27	403	Forbidden
16539537	2006	Appl Bioinformatics	NA	5	Europe	NA	10.2165/00822942-200605010-00006	5(1):45-7	AMarge: Automated Extensive Quality Assessment of Affymetrix chips.	http://www-inf.it-sudparis.eu/MARGE/Software/	http://bioinformatics.istge.it/AMarge-bin/AMargeWeb.cgi. The softw:	http://www-inf.it-sudparis.eu/MARGE/Software/	1	2017:2:7:11:50:27	200	OK
16539539	2006	Appl Bioinformatics	NA	36	Europe	NA	10.2165/00822942-200605010-00008	5(1):55-61	MHCPred 2.0: an updated quantitative T-cell epitope prediction server.	http://www.jenner.ac.uk/MHCPred/	http://www.jenner.ac.uk/MHCPred/ CONTACT::	NA	0	2017:2:7:11:50:27	404	Not Found
16539540	2006	Appl Bioinformatics	NA	1	Europe	NA	10.2165/00822942-200605010-00009	5(1):63-6	Biotool2Web: creating simple Web interfaces for bioinformatics applications.	http://www.uni-muenster.de/Bioinformatics/services/biotool2web/	http://www.uni-muenster.de/Bioinformatics/services/biotool2web/ CONTACT::	NA	0	2017:2:7:11:50:27	404	Not Found
16568445	2006	Proteins	2.499	86	North Am	NA	10.1002/prot.20977	64(1):19-27	Using evolutionary and structural information to predict DNA-binding sites on DNA-binding proteins.	http://lcg.rit.albany.edu/dp-bind/	http://lcg.rit.albany.edu/dp-bind/.	NA	1	2017:2:7:11:50:30	200	OK
16584563	2006	BMC Bioinformatics	2.435	3	North Am	PMC1450305	10.1186/1471-2105-7-185	0.420139	Ebbie: automated analysis and storage of small RNA cloning data using a dynamic web server.	http://bioinformatics.org/ebbie/	http://bioinformatics.org/ebbie/. CONCLUSIO:	NA	1	2017:2:7:11:50:30	200	OK
16613905	2006	Bioinformatics	5.766	28	North Am	NA	10.1093/bioinformatics/btl146	22(14):1690-701	Ribosomal RNA as molecular barcodes: a simple correlation analysis without sequence alignment.	http://cvtree.cbi.pku.edu.cn	http://cvtree.cbi.pku.edu.cn.	NA	0	2017:2:7:11:50:30	503	Service Unavailable
16613910	2006	Bioinformatics	5.766	5	Africa	NA	10.1093/bioinformatics/btl125	22(18):2310-2	Dragon Promoter Mapper (DPM): a Bayesian framework for modelling promoter structures.	http://defiant.i2r.a-star.edu.sg/projects/BayesPromoter/	http://defiant.i2r.a-star.edu.sg/projects/BayesPromoter/html/manual/manual.htm.	http://defiant.i2r.a-star.edu.sg/projects/BayesPromoter/	0	2017:2:7:11:50:33	500	read timeout
16635264	2006	Immunome Res	NA	NA	NA	PMC1479323	10.1186/1745-7580-2-2	02:02:00	Improved method for predicting linear B-cell epitopes.	http://www.cbs.dtu.dk/services/BepiPred	http://www.cbs.dtu.dk/services/BepiPred.	NA	1	2017:2:7:11:50:53	200	OK
16672257	2006	Bioinformatics	5.766	51	Europe	NA	10.1093/bioinformatics/btl171	22(14):1794-5	SHARP2: protein-protein interaction predictions using patch analysis.	http://www.bioinformatics.sussex.ac.uk/SHARP2	http://www.bioinformatics.sussex.ac.uk/SHARP2.	NA	0	2017:2:7:11:50:53	500	read timeout
16672258	2006	Bioinformatics	5.766	243	North Am	NA	10.1093/bioinformatics/btl170	22(14):1717-22	Ensemble classifier for protein fold pattern recognition.	http://www.csbio.sjtu.edu.cn/bioinf/PFP-Pred/	http://202.120.37.186/bioinf/fold/PFP-Pred.htm for publi	http://www.csbio.sjtu.edu.cn/bioinf/PFP-Pred/	1	2017:2:7:11:51:13	200	OK
16689701	2006	Genomics Proteomics Bioinformatics	2.168	24	Asia	NA	10.1016/S1672-0229(06)60015-6	4(1):42-7	VICMpred: an SVM-based method for the prediction of functional proteins of Gram-negative bacteria using amino acid patterns and composition.	http://www.imtech.res.in/raghava/vicmpred/	http://www.imtech.res.in/raghava/vicmpred/).	NA	1	2017:2:7:11:51:14	200	OK
16690634	2006	Bioinformatics	5.766	31	Asia	NA	10.1093/bioinformatics/btl177	22(14):1723-9	SCARNA: fast and accurate structural alignment of RNA sequences by matching fixed-length stem fragments.	http://www.scarna.org/	http://www.scarna.org/.	NA	0	2017:2:7:11:51:15	500	Can't connect to www.scarna.org:80
16700920	2006	BMC Bioinformatics	2.435	15	North Am	PMC1481619	10.1186/1471-2105-7-254	0.468056	Bounded search for de novo identification of degenerate cis-regulatory elements.	http://genie.dartmouth.edu/prism	http://genie.dartmouth.edu/prism.	NA	0	2017:2:7:11:51:15	404	Not Found
16709590	2006	Bioinformatics	5.766	13	Asia	NA	10.1093/bioinformatics/btl186	22(14):1788-9	TRFMA: a web-based tool for terminal restriction fragment length polymorphism analysis based on molecular weight.	http://myamagu.dent.kyushu-u.ac.jp/bioinformatics/trfma/index.html	http://myamagu.dent.kyushu-u.ac.jp/bioinformatics/trfma/index.html and can b:	NA	0	2017:2:7:11:51:15	500	read timeout
16711715	2006	J Chem Inf Model	3.657	22	North Am	NA	10.1021/ci0503917	46(3):971-84	Computational Science and Engineering Online (CSE-Online): a cyber-infrastructure for scientific computing.	http://cse-online.net	http://cse-online.net). CSE-Onlin:	NA	1	2017:2:7:11:51:36	200	OK
16715307	2006	Eur Spine J	2.132	14	Europe	NA	10.1007/s00586-006-0135-7	15(11):1687-94	Internet based multicenter study for thoracolumbar injuries: a new concept and preliminary results.	http://www.memdoc.org	http://www.memdoc.org ) of the	NA	0	2017:2:7:11:51:37	403	Forbidden
16722778	2006	Appl Bioinformatics	NA	1	North Am	NA	10.2165/00822942-200605020-00008	5(2):121-4	OligoMatcher: analysis and selection of specific oligonucleotide sequences for gene silencing by antisense or siRNA.	http://shelob.cs.iupui.edu:18081/oligomatch.php	http://shelob.cs.iupui.edu::18081/oligomatch.php. The sourc:	NA	0	2017:2:7:11:51:37	500	Can't connect to shelob.cs.iupui.edu:18081
16722779	2006	Appl Bioinformatics	NA	5	South Am	NA	10.2165/00822942-200605020-00009	5(2):125-30	WebaCGH: an interactive online tool for the analysis and display of array comparative genomic hybridisation data.	http://129.43.22.27/WebaCGH/welcome.htm	http://129.43.22.27/WebaCGH/welcome.htm CONTACT:	NA	0	2017:2:7:11:51:38	500	read timeout
16731044	2006	Comput Biol Chem	1.014	63	Asia	NA	10.1016/j.compbiolchem.2006.02.002	30(3):203-8	Predicting O-glycosylation sites in mammalian proteins by using SVMs.	http://www.biosino.org/Oglyc	http://www.biosino.org/Oglyc.	NA	0	2017:2:7:11:51:58	404	Not Found
16737546	2006	BMC Genomics	3.867	76	North Am	PMC1539020	10.1186/1471-2164-7-132	0.383333	CMD: a Cotton Microsatellite Database resource for Gossypium genomics.	http://www.cottonssr.org	http://www.cottonssr.org is a cur:	NA	0	2017:2:7:11:51:59	403	Forbidden
16759379	2006	BMC Struct Biol	1.926	57	Asia	PMC1513576	10.1186/1472-6807-6-11	06:11:00	ProFace: a server for the analysis of the physicochemical features of protein-protein interfaces.	http://www.boseinst.ernet.in/resources/bioinfo/stag.html	http://www.boseinst.ernet.in/resources/bioinfo/stag.html) has been	NA	1	2017:2:7:11:52:1	200	OK
16765605	2006	J Struct Biol	2.57	46	Europe	NA	10.1016/j.jsb.2006.04.011	156(1):230-43	Modeling AAA+ ring complexes from monomeric structures.	http://protevo.eb.tuebingen.mpg.de/iMolTalk	http://protevo.eb.tuebingen.mpg.de/iMolTalk). As exampl:	NA	0	2017:2:7:11:52:3	404	Not Found
16774686	2006	BMC Bioinformatics	2.435	84	North Am	PMC1550433	10.1186/1471-2105-7-301	0.500694	Improving the accuracy of protein secondary structure prediction using structural alignment.	http://wishart.biology.ualberta.ca/proteus	http://wishart.biology.ualberta.ca/proteus. For high	NA	1	2017:2:7:11:52:3	200	OK
16787975	2006	Bioinformatics	5.766	21	Asia	NA	10.1093/bioinformatics/btl180	22(14):1784-5	TSSub: eukaryotic protein subcellular localization by extracting features from profiles.	http://166.111.24.5/webtools/TSSub/index.html	http://166.111.24.5/webtools/TSSub/index.html.	NA	0	2017:2:7:11:52:8	500	read timeout
16789918	2006	In Silico Biol	NA	6	Asia	NA	NA	6(1-2):111-25	Prediction of C alpha-H...O and C alpha-H...pi interactions in proteins using recurrent neural network.	http://www.imtech.res.in/raghava/chpredict/	http://www.imtech.res.in/raghava/chpredict/) has been	NA	1	2017:2:7:11:52:28	200	OK
16792795	2006	BMC Bioinformatics	2.435	27	Europe	PMC1513607	10.1186/1471-2105-7-315	0.510417	PHY.FI: fast and easy online creation and manipulation of phylogeny color figures.	http://cgi-www.daimi.au.dk/cgi-chili/phyfi/go	http://cgi-www.daimi.au.dk/cgi-chili/phyfi/go.	NA	1	2017:2:7:11:52:30	200	OK
16792816	2006	BMC Struct Biol	1.926	57	North Am	PMC1540425	10.1186/1472-6807-6-13	06:13:00	Prediction of transmembrane helix orientation in polytopic membrane proteins.	http://gila.bioengr.uic.edu/lab/larisa/lips.html	http://gila.bioengr.uic.edu/lab/larisa/lips.html.	NA	0	2017:2:7:11:52:31	500	Can't connect to gila.bioengr.uic.edu:80
16792820	2006	BMC Bioinformatics	2.435	32	Europe	PMC1539025	10.1186/1471-2105-7-318	0.5125	MACSIMS: multiple alignment of complete sequences information management system.	http://bips.u-strasbg.fr/MACSIMS/	http://bips.u-strasbg.fr/MACSIMS/.	NA	0	2017:2:7:11:52:31	404	Not Found
16806277	2006	J Theor Biol	2.049	109	North Am	NA	10.1016/j.jtbi.2006.05.006	242(4):941-6	Using stacked generalization to predict membrane protein types based on pseudo-amino acid composition.	http://202.120.37.186/bioinf/wangsq/service.htm	http://202.120.37.186/bioinf/wangsq/service.htm.	NA	0	2017:2:7:11:52:31	500	read timeout
16819804	2006	J Bioinform Comput Biol	0.831	31	Europe	NA	10.1142/S0219720006001904	4(2):589-96	RNAKinetics: a web server that models secondary structure kinetics of an elongating RNA.	http://www.ig-msk.ru/RNA/kinetics	http://www.ig-msk.ru/RNA/kinetics) is a web	NA	1	2017:2:7:11:52:51	200	OK
16820425	2006	Bioinformatics	5.766	5	Europe	NA	10.1093/bioinformatics/btl349	22(17):2164-5	MAGOS: multiple alignment and modelling server.	http://pig-pbil.ibcp.fr/magos	http://pig-pbil.ibcp.fr/magos.	NA	0	2017:2:7:11:52:51	500	read timeout
16823900	2006	Magn Reson Chem	1.226	35	North Am	NA	10.1002/mrc.1832	44 Spec No:S158-67	Accurate prediction of protein torsion angles using chemical shifts and sequence homology.	http://wishart.biology.ualberta.ca/shiftor	http://wishart.biology.ualberta.ca/shiftor.	NA	1	2017:2:7:11:53:11	200	OK
16832638	2006	Immunogenetics	2.303	20	Asia	NA	10.1007/s00251-006-0117-2	58(8):607-13	MHC-BPS: MHC-binder prediction server for identifying peptides of flexible lengths from sequence-derived physicochemical properties.	http://bidd.cz3.nus.edu.sg/mhc/	http://bidd.cz3.nus.edu.sg/mhc/ .	NA	0	2017:2:7:11:53:11	500	Can't connect to bidd.cz3.nus.edu.sg:80
16837531	2006	Bioinformatics	5.766	26	Asia	NA	10.1093/bioinformatics/btl366	22(17):2081-6	An initial strategy for comparing proteins at the domain architecture level.	http://cmb.bnu.edu.cn/pdart/	http://cmb.bnu.edu.cn/pdart/.	NA	1	2017:2:7:11:53:12	200	OK
16844090	2006	Biochem Biophys Res Commun	NA	8	Asia	NA	10.1016/j.bbrc.2006.06.066	347(3):574-80	Prediction of pi-turns in proteins using PSI-BLAST profiles and secondary structure information.	http://210.42.106.80/piturn/	http://210.42.106.80/piturn/.	NA	0	2017:2:7:11:53:13	503	Service Unavailable
16844706	2006	Bioinformatics	5.766	264	Europe	PMC1865486	10.1093/bioinformatics/btl390	22(18):2291-7	Global topological features of cancer proteins in the human interactome.	http://bmm.cancerresearchuk.org/servers/pip/bioinformatics/	http://bmm.cancerresearchuk.org/servers/pip/bioinformatics/	NA	1	2017:2:7:11:53:29	200	OK
16844969	2006	Nucleic Acids Res	9.202	4	Europe	PMC1538871	10.1093/nar/gkl330	34(Web Server issue):W10-4	FISH--family identification of sequence homologues using structure anchored hidden Markov models.	http://babel.ucmp.umu.se/fish/	http://babel.ucmp.umu.se/fish/.	NA	1	2017:2:7:11:53:29	200	OK
16844971	2006	Nucleic Acids Res	9.202	21	Europe	PMC1538789	10.1093/nar/gkl203	34(Web Server issue):W110-5	TreeDet: a web server to explore sequence space.	http://www.pdg.cnb.uam.es/servers/treedet	http://www.pdg.cnb.uam.es/servers/treedet.	NA	0	2017:2:7:11:53:29	404	Not Found
16844972	2006	Nucleic Acids Res	9.202	862	North Am	PMC1538779	10.1093/nar/gkl282	34(Web Server issue):W116-8	CASTp: computed atlas of surface topography of proteins with structural and topographical mapping of functionally annotated residues.	http://cast.engr.uic.edu	http://cast.engr.uic.edu) is an onl:	NA	1	2017:2:7:11:53:30	200	OK
16844973	2006	Nucleic Acids Res	9.202	42	Europe	PMC1538797	10.1093/nar/gkl199	34(Web Server issue):W119-23	Protein Block Expert (PBE): a web-based protein structure analysis server using a structural alphabet.	http://bioinformatics.univ-reunion.fr/PBE/	http://bioinformatics.univ-reunion.fr/PBE/.	NA	0	2017:2:7:11:53:31	500	read timeout
16844974	2006	Nucleic Acids Res	9.202	31	Asia	PMC1538882	10.1093/nar/gkl104	34(Web Server issue):W124-7	ReadOut: structure-based calculation of direct and indirect readout energies and specificities for protein-DNA recognition.	http://gibk26.bse.kyutech.ac.jp/jouhou/readout/	http://gibk26.bse.kyutech.ac.jp/jouhou/readout/. The only	NA	0	2017:2:7:11:53:52	500	Can't connect to gibk26.bse.kyutech.ac.jp:80
16844975	2006	Nucleic Acids Res	9.202	62	Asia	PMC1538824	10.1093/nar/gkl036	34(Web Server issue):W128-32	3dSS: 3D structural superposition.	http://cluster.physics.iisc.ernet.in/3dss/	http://cluster.physics.iisc.ernet.in/3dss/ or http::/:	NA	1	2017:2:7:11:53:52	200	OK
16844977	2006	Nucleic Acids Res	9.202	46	Europe	PMC1538828	10.1093/nar/gkl130	34(Web Server issue):W137-42	HHrep: de novo protein repeat detection and the origin of TIM barrels.	https://toolkit.tuebingen.mpg.de/hhpred	http://hhrep.tuebingen.mpg.de.	https://toolkit.tuebingen.mpg.de/hhpred	1	2017:2:7:11:53:53	200	OK
16844978	2006	Nucleic Acids Res	9.202	9	Asia	PMC1538780	10.1093/nar/gkl157	34(Web Server issue):W143-6	Cascade PSI-BLAST web server: a remote homology search tool for relating protein domains.	http://crick.mbu.iisc.ernet.in/~CASCADE/CascadeBlast.html	http://crick.mbu.iisc.ernet.in/~CASCADE/CascadeBlast.html.	NA	0	2017:2:7:11:53:53	503	Service Unavailable
16844981	2006	Nucleic Acids Res	9.202	79	Asia	PMC1538880	10.1093/nar/gkl187	34(Web Server issue):W152-7	(PS)2: protein structure prediction server.	http://ps2.life.nctu.edu.tw/	http://ps2.life.nctu.edu.tw/.	NA	1	2017:2:7:11:53:53	200	OK
16844982	2006	Nucleic Acids Res	9.202	9	Asia	PMC1538912	10.1093/nar/gkl331	34(Web Server issue):W158-63	KemaDom: a web server for domain prediction using kernel machine with local context.	http://www.iipl.fudan.edu.cn/~lschen/kemadom.htm	http://www.iipl.fudan.edu.cn/~lschen/kemadom.htm.	NA	0	2017:2:7:11:53:54	503	Service Unavailable
16844983	2006	Nucleic Acids Res	9.202	88	Europe	PMC1538873	10.1093/nar/gkl166	34(Web Server issue):W164-8	Spritz: a server for the prediction of intrinsically disordered regions in protein sequences using kernel machines.	http://protein.cribi.unipd.it/spritz/	http://protein.cribi.unipd.it/spritz/.	NA	1	2017:2:7:11:54:10	200	OK
16844984	2006	Nucleic Acids Res	9.202	29	Europe	PMC1538841	10.1093/nar/gkl208	34(Web Server issue):W169-72	PONGO: a web server for multiple predictions of all-alpha transmembrane proteins.	http://pongo.biocomp.unibo.it/pongo	http://pongo.biocomp.unibo.it/pongo.	NA	0	2017:2:7:11:54:10	503	Service Unavailable
16844985	2006	Nucleic Acids Res	9.202	49	North Am	PMC1538831	10.1093/nar/gkl113	34(Web Server issue):W173-6	ArchPRED: a template based loop structure prediction server.	http://www.fiserlab.org/servers/archpred	http://www.fiserlab.org/servers/archpred) implement:	NA	1	2017:2:7:11:54:13	200	OK
16844986	2006	Nucleic Acids Res	9.202	133	Europe	PMC1538823	10.1093/nar/gkl266	34(Web Server issue):W177-81	DISULFIND: a disulfide bonding state and cysteine connectivity prediction server.	http://disulfind.dsi.unifi.it/	http://disulfind.dsi.unifi.it/.	NA	1	2017:2:7:11:54:14	200	OK
16844987	2006	Nucleic Acids Res	9.202	66	North Am	PMC1538812	10.1093/nar/gkl189	34(Web Server issue):W182-5	DiANNA 1.1: an extension of the DiANNA web server for ternary cysteine classification.	http://bioinformatics.bc.edu/clotelab/DiANNA/	http://bioinformatics.bc.edu/clotelab/DiANNA/.	NA	1	2017:2:7:11:54:14	200	OK
16844988	2006	Nucleic Acids Res	9.202	38	North Am	PMC1538807	10.1093/nar/gkl262	34(Web Server issue):W186-8	PROFtmb: a web server for predicting bacterial transmembrane beta barrel proteins.	http://rostlab.org/services/proftmb	http://rostlab.org/services/proftmb.	NA	0	2017:2:7:11:54:14	404	Not Found
16844989	2006	Nucleic Acids Res	9.202	20	Europe	PMC1538872	10.1093/nar/gkl205	34(Web Server issue):W189-93	transFold: a web server for predicting the structure and residue contacts of transmembrane beta-barrels.	http://bioinformatics.bc.edu/clotelab/transFold	http://bioinformatics.bc.edu/clotelab/transFold.	NA	1	2017:2:7:11:54:15	200	OK
16844990	2006	Nucleic Acids Res	9.202	48	Europe	PMC1538857	10.1093/nar/gkl284	34(Web Server issue):W194-7	SVMHC: a server for prediction of MHC-binding peptides.	http://abi.inf.uni-tuebingen.de/Services/SVMHC	http://www-bs.informatik.uni-tuebingen.de/SVMHC/.	http://abi.inf.uni-tuebingen.de/Services/SVMHC	1	2017:2:7:11:54:15	200	OK
16844991	2006	Nucleic Acids Res	9.202	12	Asia	PMC1538771	10.1093/nar/gkl188	34(Web Server issue):W198-201	REMUS: a tool for identification of unique peptide segments as epitopes.	http://biotools.cs.ntou.edu.tw/Remus.asp	http://spider.cs.ntou.edu.tw/BioTools/REMUS-DOCS.html, and detai:	http://biotools.cs.ntou.edu.tw/Remus.asp	1	2017:2:7:11:54:15	200	OK
16844992	2006	Nucleic Acids Res	9.202	23	Europe	PMC1538836	10.1093/nar/gkl273	34(Web Server issue):W20-3	PAST: fast structure-based searching in the PDB.	http://past.in.tum.de/	http://past.in.tum.de/.	NA	1	2017:2:7:11:54:20	200	OK
16844993	2006	Nucleic Acids Res	9.202	6	Asia	PMC1538861	10.1093/nar/gkl267	34(Web Server issue):W320-4	PreBI: prediction of biological interfaces of proteins in crystals.	http://pre-s.protein.osaka-u.ac.jp/~prebi/	http://pre-s.protein.osaka-u.ac.jp/~prebi/.	NA	0	2017:2:7:11:54:20	500	Can't connect to pre-s.protein.osaka-u.ac.jp:80
16844994	2006	Nucleic Acids Res	9.202	105	Asia	PMC1538830	10.1093/nar/gkl343	34(Web Server issue):W202-9	AlgPred: prediction of allergenic proteins and mapping of IgE epitopes.	http://www.imtech.res.in/raghava/algpred/	http://www.imtech.res.in/raghava/algpred/). AlgPred i:	NA	1	2017:2:7:11:54:20	200	OK
16844995	2006	Nucleic Acids Res	9.202	42	North Am	PMC1538910	10.1093/nar/gkl093	34(Web Server issue):W210-3	pTARGET: a web server for predicting protein subcellular localization.	http://bioinformatics.albany.edu/~ptarget	http://bioinformatics.albany.edu/~ptarget.	NA	0	2017:2:7:11:54:21	404	Not Found
16844997	2006	Nucleic Acids Res	9.202	160	Asia	PMC1538869	10.1093/nar/gkl114	34(Web Server issue):W219-24	TarFisDock: a web server for identifying drug targets with docking approach.	http://www.dddc.ac.cn/tarfisdock/	http://www.dddc.ac.cn/tarfisdock/.	NA	1	2017:2:7:11:54:21	200	OK
16844999	2006	Nucleic Acids Res	9.202	17	Asia	PMC1538917	10.1093/nar/gkl314	34(Web Server issue):W231-4	HARMONY: a server for the assessment of protein structures.	http://caps.ncbs.res.in/harmony/	http://caps.ncbs.res.in/harmony/	NA	1	2017:2:7:11:54:24	200	OK
16845000	2006	Nucleic Acids Res	9.202	85	North Am	PMC1538902	10.1093/nar/gkl163	34(Web Server issue):W235-8	RosettaDesign server for protein design.	http://rosettadesign.med.unc.edu	http://rosettadesign.med.unc.edu). The clien:	NA	1	2017:2:7:11:54:25	200	OK
16845002	2006	Nucleic Acids Res	9.202	82	North Am	PMC1538811	10.1093/nar/gkl084	34(Web Server issue):W24-31	oGNM: online computation of structural dynamics using the Gaussian Network Model.	http://ignm.ccbb.pitt.edu/GNM_Online_Calculation.htm	http://ignm.ccbb.pitt.edu/GNM_Online_Calculation.htm.	NA	1	2017:2:7:11:54:25	200	OK
16845004	2006	Nucleic Acids Res	9.202	67	Asia	PMC1538891	10.1093/nar/gkl233	34(Web Server issue):W249-53	MeMo: a web tool for prediction of protein methylation modifications.	http://www.bioinfo.tsinghua.edu.cn/~tigerchen/memo.html	http://www.bioinfo.tsinghua.edu.cn/~tigerchen/memo.html.	NA	0	2017:2:7:11:54:25	500	Can't connect to www.bioinfo.tsinghua.edu.cn:80
16845005	2006	Nucleic Acids Res	9.202	111	North Am	PMC1538802	10.1093/nar/gkl207	34(Web Server issue):W254-7	SUMOsp: a web server for sumoylation site prediction.	http://sumosp.biocuckoo.org/	http://bioinformatics.lcd-ustc.org/sumosp/.	http://sumosp.biocuckoo.org/	1	2017:2:7:11:54:26	200	OK
16845006	2006	Nucleic Acids Res	9.202	41	Asia	PMC1538808	10.1093/nar/gkl245	34(Web Server issue):W258-63	MODi: a powerful and convenient web server for identifying multiple post-translational peptide modifications from tandem mass spectra.	http://modi.uos.ac.kr/modi/	http://modi.uos.ac.kr/modi/) is a powe:	NA	0	2017:2:7:11:54:27	500	Can't connect to modi.uos.ac.kr:80
16845007	2006	Nucleic Acids Res	9.202	21	Asia	PMC1538838	10.1093/nar/gkl242	34(Web Server issue):W264-6	DyNAVacS: an integrative tool for optimized DNA vaccine design.	http://miracle.igib.res.in/dynavac/	http://miracle.igib.res.in/dynavac/.	NA	0	2017:2:7:11:54:28	500	Can't connect to miracle.igib.res.in:80
16845009	2006	Nucleic Acids Res	9.202	68	Europe	PMC1538908	10.1093/nar/gkl237	34(Web Server issue):W273-9	BAGEL: a web-based bacteriocin genome mining tool.	http://bagel.molgenrug.nl/	http://bioinformatics.biol.rug.nl/websoftware/bagel.	http://bagel.molgenrug.nl/	1	2017:2:7:11:54:28	200	OK
16845014	2006	Nucleic Acids Res	9.202	28	North Am	PMC1538876	10.1093/nar/gkl379	34(Web Server issue):W3-5	A compilation of molecular biology web servers: 2006 update on the Bioinformatics Links Directory.	http://bioinformatics.ubc.ca/resources/links_directory/narweb2006/	http://bioinformatics.ubc.ca/resources/links_directory/narweb2006/. The 2006	NA	0	2017:2:7:11:54:28	404	Not Found
16845015	2006	Nucleic Acids Res	9.202	15	Asia	PMC1538868	10.1093/nar/gkl344	34(Web Server issue):W303-9	Protemot: prediction of protein binding sites with automatically extracted geometrical templates.	http://bioinfo.mc.ntu.edu.tw/protemot/step1.cgi	http://bioinfo.mc.ntu.edu.tw/protemot/step1.cgi.	NA	1	2017:2:7:11:54:29	200	OK
16845016	2006	Nucleic Acids Res	9.202	276	North Am	PMC1538913	10.1093/nar/gkl206	34(Web Server issue):W310-4	GRAMM-X public web server for protein-protein docking.	http://vakser.bioinformatics.ku.edu/resources/gramm/grammx	http://vakser.bioinformatics.ku.edu/resources/gramm/grammx) extend th:	NA	1	2017:2:7:11:54:31	200	OK
16845017	2006	Nucleic Acids Res	9.202	14	Europe	PMC1538787	10.1093/nar/gkl112	34(Web Server issue):W315-9	TSEMA: interactive prediction of protein pairings between interacting families.	http://tsema.bioinfo.cnio.es/	http://pdg.cnb.uam.es/TSEMA. Standalon:	http://tsema.bioinfo.cnio.es/	1	2017:2:7:11:54:34	200	OK
16845018	2006	Nucleic Acids Res	9.202	149	Asia	PMC1538821	10.1093/nar/gkl305	34(Web Server issue):W32-7	PROFEAT: a web server for computing structural and physicochemical features of proteins and peptides from amino acid sequence.	http://jing.cz3.nus.edu.sg/cgi-bin/prof/prof.cgi	http://jing.cz3.nus.edu.sg/cgi-bin/prof/prof.cgi.	NA	0	2017:2:7:11:54:34	500	Can't connect to jing.cz3.nus.edu.sg:80
16845019	2006	Nucleic Acids Res	9.202	15	Europe	PMC1538843	10.1093/nar/gkl211	34(Web Server issue):W325-9	kinDOCK: a tool for comparative docking of protein kinase ligands.	http://abcis.cbs.cnrs.fr/kindock/	http://abcis.cbs.cnrs.fr/kindock/.	NA	1	2017:2:7:11:54:34	200	OK
16845024	2006	Nucleic Acids Res	9.202	87	Europe	PMC1538856	10.1093/nar/gkl159	34(Web Server issue):W350-5	DILIMOT: discovery of linear motifs in proteins.	http://dilimot.embl.de	http://dilimot.embl.de.	NA	1	2017:2:7:11:54:34	200	OK
16845028	2006	Nucleic Acids Res	9.202	NA	NA	PMC1538909	10.1093/nar/gkl198	34(Web Server issue):W369-73	MEME: discovering and analyzing DNA and protein sequence motifs.	http://meme-suite.org/tools/meme	http://meme.nbcr.net) and sever:	http://meme-suite.org/tools/meme	1	2017:2:7:11:54:35	200	OK
16845029	2006	Nucleic Acids Res	9.202	48	Europe	PMC1538784	10.1093/nar/gkl195	34(Web Server issue):W374-8	HHsenser: exhaustive transitive profile search using HMM-HMM comparison.	https://toolkit.tuebingen.mpg.de/hhsenser	http://hhsenser.tuebingen.mpg.de/. It has al:	https://toolkit.tuebingen.mpg.de/hhsenser	1	2017:2:7:11:54:35	200	OK
16845030	2006	Nucleic Acids Res	9.202	27	North Am	PMC1538919	10.1093/nar/gkl045	34(Web Server issue):W379-81	JAFA: a protein function annotation meta-server.	http://jafa.burnham.org	http://jafa.burnham.org.	NA	0	2017:2:7:11:54:36	500	Can't connect to jafa.burnham.org:80
16845031	2006	Nucleic Acids Res	9.202	36	Europe	PMC1538897	10.1093/nar/gkl072	34(Web Server issue):W38-42	PDB_Hydro: incorporating dipolar solvents with variable density in the Poisson-Boltzmann treatment of macromolecule electrostatics.	http://lorentz.immstr.pasteur.fr/pdb_hydro.php	http://lorentz.immstr.pasteur.fr/pdb_hydro.php) that both:	NA	1	2017:2:7:11:54:36	200	OK
16845032	2006	Nucleic Acids Res	9.202	23	North Am	PMC1538794	10.1093/nar/gkl272	34(Web Server issue):W382-4	SWAKK: a web server for detecting positive selection in proteins using a sliding window substitution rate analysis.	http://oxytricha.princeton.edu/SWAKK/	http://oxytricha.princeton.edu/SWAKK/.	NA	1	2017:2:7:11:54:36	200	OK
16845034	2006	Nucleic Acids Res	9.202	18	Europe	PMC1538875	10.1093/nar/gkl044	34(Web Server issue):W389-93	GenDecoder: genetic code prediction for metazoan mitochondria.	http://darwin.uvigo.es/software/gendecoder.html	http://darwin.uvigo.es/software/gendecoder.html.	NA	1	2017:2:7:11:54:36	200	OK
16845035	2006	Nucleic Acids Res	9.202	604	North Am	PMC1538769	10.1093/nar/gkl244	34(Web Server issue):W394-9	NAST: a multiple sequence alignment server for comparative analysis of 16S rRNA genes.	http://greengenes.lbl.gov/NAST	http://greengenes.lbl.gov/NAST. Each user:	NA	1	2017:2:7:11:54:36	200	OK
16845037	2006	Nucleic Acids Res	9.202	23	North Am	PMC1538790	10.1093/nar/gkl269	34(Web Server issue):W405-11	CorreLogo: an online server for 3D sequence logos of RNA and DNA alignments.	http://correlogo.abcc.ncifcrf.gov	http://correlogo.abcc.ncifcrf.gov.	NA	1	2017:2:7:11:54:37	200	OK
16845038	2006	Nucleic Acids Res	9.202	31	Asia	PMC1538835	10.1093/nar/gkl312	34(Web Server issue):W412-5	The ARTS web server for aligning RNA tertiary structures.	http://bioinfo3d.cs.tau.ac.il/ARTS	http://bioinfo3d.cs.tau.ac.il/ARTS.	NA	1	2017:2:7:11:54:38	200	OK
16845040	2006	Nucleic Acids Res	9.202	13	Asia	PMC1538813	10.1093/nar/gkl231	34(Web Server issue):W423-8	RNAMST: efficient and flexible approach for identifying RNA structural homologs.	http://bioinfo.csie.ncu.edu.tw/~rnamst/	http://bioinfo.csie.ncu.edu.tw/~rnamst/.	NA	0	2017:2:7:11:54:39	503	Service Unavailable
16845041	2006	Nucleic Acids Res	9.202	NA	NA	PMC1538840	10.1093/nar/gkl333	34(Web Server issue):W429-34	RegRNA: an integrated web server for identifying regulatory RNA motifs and elements.	http://regrna.mbc.nctu.edu.tw/index1.php	http://RegRNA.mbc.NCTU.edu.tw/.	http://regrna.mbc.nctu.edu.tw/indeNA1.php	1	2017:2:7:11:54:40	200	OK
16845042	2006	Nucleic Acids Res	9.202	13	Europe	PMC1538834	10.1093/nar/gkl165	34(Web Server issue):W43-7	PHEPS: web-based pH-dependent Protein Electrostatics Server.	http://pheps.orgchm.bas.bg/home.html	http://pheps.orgchm.bas.bg/home.html.	NA	0	2017:2:7:11:54:43	503	Service Unavailable
16845043	2006	Nucleic Acids Res	9.202	166	Europe	PMC1538822	10.1093/nar/gkl200	34(Web Server issue):W435-9	AUGUSTUS: ab initio prediction of alternative transcripts.	http://bioinf.uni-greifswald.de/webaugustus/	http://augustus.gobics.de.	http://bioinf.uni-greifswald.de/webaugustus/	1	2017:2:7:11:54:46	200	OK
16845045	2006	Nucleic Acids Res	9.202	10	Asia	PMC1538904	10.1093/nar/gkl268	34(Web Server issue):W444-7	ASGS: an alternative splicing graph web service.	http://asgs.biolinfo.org	http://asgs.biolinfo.org.	NA	0	2017:2:7:11:54:46	500	Can't connect to asgs.biolinfo.org:80
16845048	2006	Nucleic Acids Res	9.202	46	Asia	PMC1538778	10.1093/nar/gkl321	34(Web Server issue):W455-8	ProMiR II: a web server for the probabilistic prediction of clustered, nonclustered, conserved and nonconserved microRNAs.	http://cbit.snu.ac.kr/~ProMiR2/	http://cbit.snu.ac.kr/~ProMiR2/.	NA	0	2017:2:7:11:54:46	500	Can't connect to cbit.snu.ac.kr:80
16845049	2006	Nucleic Acids Res	9.202	88	Asia	PMC1538775	10.1093/nar/gkl066	34(Web Server issue):W459-62	EGassembler: online bioinformatics service for large-scale processing, clustering and assembling ESTs and genomic DNA fragments.	http://egassembler.hgc.jp/	http://egassembler.hgc.jp/) is a web	NA	1	2017:2:7:11:54:46	200	OK
16845050	2006	Nucleic Acids Res	9.202	31	Europe	PMC1538796	10.1093/nar/gkl255	34(Web Server issue):W463-5	jpHMM at GOBICS: a web server to detect genomic recombinations in HIV-1.	http://jphmm.gobics.de/	http://jphmm.gobics.de/.	NA	1	2017:2:7:11:54:47	200	OK
16845051	2006	Nucleic Acids Res	9.202	69	North Am	PMC1538788	10.1093/nar/gkl308	34(Web Server issue):W466-71	BiologicalNetworks: visualization and analysis tool for systems biology.	http://brak.sdsc.edu/pub/BiologicalNetworks	http://brak.sdsc.edu/pub/BiologicalNetworks.	NA	0	2017:2:7:11:54:47	404	Not Found
16845054	2006	Nucleic Acids Res	9.202	26	Europe	PMC1538816	10.1093/nar/gkl192	34(Web Server issue):W48-51	pKD: re-designing protein pKa values.	http://enzyme.ucd.ie/cgi-bin/pKD/server_start.cgi	http://polymerase.ucd.ie/pKa_Design), which pre:	http://enzyme.ucd.ie/cgi-bin/pKD/server_start.cgi	1	2017:2:7:11:54:48	200	OK
16845055	2006	Nucleic Acids Res	9.202	2	North Am	PMC1538860	10.1093/nar/gkl162	34(Web Server issue):W482-5	BTW: a web server for Boltzmann time warping of gene expression time series.	http://bioinformatics.bc.edu/clotelab/BTW/	http://bioinformatics.bc.edu/clotelab/BTW/.	NA	1	2017:2:7:11:54:48	200	OK
16845057	2006	Nucleic Acids Res	9.202	7	Asia	PMC1538815	10.1093/nar/gkl067	34(Web Server issue):W492-7	GEPS: the Gene Expression Pattern Scanner.	http://bioinf.xmu.edu.cn/software/geps/geps.php	http://bioinf.xmu.edu.cn/software/geps/geps.php.	NA	0	2017:2:7:11:54:48	404	Not Found
16845059	2006	Nucleic Acids Res	9.202	112	Europe	PMC1538833	10.1093/nar/gkl204	34(Web Server issue):W504-9	Arabidopsis Co-expression Tool (ACT): web server tools for microarray-based gene expression analysis.	www.Arabidopsis.leeds.ac.uk/ACT	www.Arabidopsis.leeds.ac.uk/ACT.	NA	0	2017:2:7:11:54:50	500	Can't connect to www.Arabidopsis.leeds.ac.uk:80
16845062	2006	Nucleic Acids Res	9.202	199	Europe	PMC1538881	10.1093/nar/gkl082	34(Web Server issue):W52-6	NOMAD-Ref: visualization, deformation and refinement of macromolecular structures based on all-atom normal mode analysis.	http://lorentz.immstr.pasteur.fr/nomad-ref.php	http://lorentz.immstr.pasteur.fr/nomad-ref.php.	NA	1	2017:2:7:11:54:50	200	OK
16845063	2006	Nucleic Acids Res	9.202	7	Europe	PMC1538905	10.1093/nar/gkl041	34(Web Server issue):W524-8	TFBScluster web server for the identification of mammalian composite regulatory elements.	http://hscl.cimr.cam.ac.uk/TFBScluster_genome_portal.html	http://hscl.cimr.cam.ac.uk/TFBScluster_genome_portal.html.	NA	1	2017:2:7:11:54:50	200	OK
16845064	2006	Nucleic Acids Res	9.202	5	Europe	PMC1538886	10.1093/nar/gkl212	34(Web Server issue):W529-33	VOMBAT: prediction of transcription factor binding sites using variable order Bayesian trees.	http://pdw-24.ipk-gatersleben.de:8080/VOMBAT/	http://pdw-24.ipk-gatersleben.de::8080/VOMBAT/.	NA	0	2017:2:7:11:54:50	500	Can't connect to pdw-24.ipk-gatersleben.de:8080
16845066	2006	Nucleic Acids Res	9.202	26	Europe	PMC1538785	10.1093/nar/gkl342	34(Web Server issue):W541-5	Composite Module Analyst: identification of transcription factor binding site combinations using genetic algorithm.	http://www.gene-regulation.com/pub/programs/cma/CMA.html	http://www.gene-regulation.com/pub/programs/cma/CMA.html. An advanc:	NA	1	2017:2:7:11:54:50	200	OK
16845068	2006	Nucleic Acids Res	9.202	111	North Am	PMC1538818	10.1093/nar/gkl322	34(Web Server issue):W551-4	CEAS: cis-regulatory element annotation system.	http://ceas.cbi.pku.edu.cn	http://ceas.cbi.pku.edu.cn.	NA	1	2017:2:7:11:54:50	200	OK
16845069	2006	Nucleic Acids Res	9.202	34	North Am	PMC1538799	10.1093/nar/gkl224	34(Web Server issue):W555-9	Stubb: a program for discovery and analysis of cis-regulatory modules.	http://stubb.rockefeller.edu/	http://stubb.rockefeller.edu/.	NA	0	2017:2:7:11:54:52	500	read timeout
16845071	2006	Nucleic Acids Res	9.202	50	Europe	PMC1538899	10.1093/nar/gkl285	34(Web Server issue):W566-70	MoD Tools: regulatory motif discovery in nucleotide sequences from co-regulated or homologous genes.	http://www.beacon.unimi.it/modtools/	http://www.beacon.unimi.it/modtools/.	NA	0	2017:2:7:11:55:12	500	read timeout
16845072	2006	Nucleic Acids Res	9.202	12	North Am	PMC1538792	10.1093/nar/gkl039	34(Web Server issue):W57-62	UMMS: constrained harmonic and anharmonic analyses of macromolecules based on elastic network models.	http://biomechanics.ecs.umass.edu/umms.html	http://biomechanics.ecs.umass.edu/umms.html.	NA	0	2017:2:7:11:55:32	500	Can't connect to biomechanics.ecs.umass.edu:80
16845073	2006	Nucleic Acids Res	9.202	35	Asia	PMC1538777	10.1093/nar/gkl279	34(Web Server issue):W571-7	CRSD: a comprehensive web server for composite regulatory signature discovery.	http://biochip.nchu.edu.tw/crsd1/	http://biochip.nchu.edu.tw/crsd1/.	NA	0	2017:2:7:11:55:32	500	read timeout
16845074	2006	Nucleic Acids Res	9.202	10	Europe	PMC1538850	10.1093/nar/gkl193	34(Web Server issue):W578-83	PromAn: an integrated knowledge-based web server dedicated to promoter analysis.	http://bips.u-strasbg.fr/PromAn	http://bips.u-strasbg.fr/PromAn.	NA	0	2017:2:7:11:55:53	404	Not Found
16845079	2006	Nucleic Acids Res	9.202	136	North Am	PMC1538791	10.1093/nar/gkl164	34(Web Server issue):W6-9	BLAST: improvements for better sequence analysis.	http://www.ncbi.nlm.nih.gov/BLAST/	http://www.ncbi.nlm.nih.gov/BLAST/. We report:	NA	1	2017:2:7:11:55:53	200	OK
16845080	2006	Nucleic Acids Res	9.202	11	Europe	PMC1538918	10.1093/nar/gkl170	34(Web Server issue):W600-3	PROTOGENE: turning amino acid alignments into bona fide CDS nucleotide alignments.	http://www.tcoffee.org/	http://www.tcoffee.org/.	NA	1	2017:2:7:11:55:54	200	OK
16845081	2006	Nucleic Acids Res	9.202	222	Europe	PMC1538866	10.1093/nar/gkl092	34(Web Server issue):W604-8	Expresso: automatic incorporation of structural information in multiple sequence alignments using 3D-Coffee.	http://www.tcoffee.org/	http://www.tcoffee.org/.	NA	1	2017:2:7:11:55:54	200	OK
16845082	2006	Nucleic Acids Res	9.202	622	Europe	PMC1538804	10.1093/nar/gkl315	34(Web Server issue):W609-12	PAL2NAL: robust conversion of protein sequence alignments into the corresponding codon alignments.	http://www.bork.embl.de/pal2nal	http://www.bork.embl.de/pal2nal.	NA	1	2017:2:7:11:55:54	200	OK
16845083	2006	Nucleic Acids Res	9.202	3	North Am	PMC1538870	10.1093/nar/gkl288	34(Web Server issue):W613-6	AliWABA: alignment on the web through an A-Bruijn approach.	http://aba.nbcr.net/	http://aba.nbcr.net/	NA	0	2017:2:7:11:55:55	500	Can't connect to aba.nbcr.net:80
16845084	2006	Nucleic Acids Res	9.202	14	North Am	PMC1538810	10.1093/nar/gkl123	34(Web Server issue):W617-20	FootPrinter3: phylogenetic footprinting in partially alignable sequences.	http://www.mcb.mcgill.ca/~blanchem/FootPrinter3	http://www.mcb.mcgill.ca/~blanchem/FootPrinter3.	NA	0	2017:2:7:11:55:55	500	read timeout
16845087	2006	Nucleic Acids Res	9.202	121	North Am	PMC1538894	10.1093/nar/gkl341	34(Web Server issue):W63-9	PREDITOR: a web server for predicting protein torsion angle restraints.	http://wishart.biology.ualberta.ca/preditor	http://wishart.biology.ualberta.ca/preditor.	NA	1	2017:2:7:11:56:15	200	OK
16845089	2006	Nucleic Acids Res	9.202	378	Asia	PMC1538865	10.1093/nar/gkl236	34(Web Server issue):W635-41	FASTSNP: an always up-to-date and extendable service for SNP function analysis and prioritization.	http://fastsnp.ibms.sinica.edu.tw	http://fastsnp.ibms.sinica.edu.tw.	NA	0	2017:2:7:11:56:16	500	read timeout
16845091	2006	Nucleic Acids Res	9.202	11	Europe	PMC1538889	10.1093/nar/gkl125	34(Web Server issue):W651-5	SNPmasker: automatic masking of SNPs and repeats across eukaryotic genomes.	http://bioinfo.ebc.ee/snpmasker/	http://bioinfo.ebc.ee/snpmasker/ and is fr	NA	1	2017:2:7:11:56:36	200	OK
16845092	2006	Nucleic Acids Res	9.202	44	Oceania	PMC1538772	10.1093/nar/gkl083	34(Web Server issue):W656-9	SSRPrimer and SSR Taxonomy Tree: Biome SSR discovery.	http://bioinformatics.pbcbasc.latrobe.edu.au/ssrdiscovery.html	http://bioinformatics.pbcbasc.latrobe.edu.au/ssrdiscovery.html.	NA	0	2017:2:7:11:56:37	500	Can't connect to bioinformatics.pbcbasc.latrobe.edu.au:80
16845094	2006	Nucleic Acids Res	9.202	14	Asia	PMC1538814	10.1093/nar/gkl297	34(Web Server issue):W665-9	PrimerStation: a highly specific multiplex genomic PCR primer design server for the human genome.	http://ps.cb.k.u-tokyo.ac.jp	http://ps.cb.k.u-tokyo.ac.jp) is a web	NA	1	2017:2:7:11:56:37	200	OK
16845096	2006	Nucleic Acids Res	9.202	184	North Am	PMC1538864	10.1093/nar/gkl253	34(Web Server issue):W676-82	QGRS Mapper: a web-based server for predicting G-quadruplexes in nucleotide sequences.	http://bioinformatics.ramapo.edu/QGRS/	http://bioinformatics.ramapo.edu/QGRS/.	NA	1	2017:2:7:11:56:38	200	OK
16845097	2006	Nucleic Acids Res	9.202	48	Asia	PMC1538896	10.1093/nar/gkl299	34(Web Server issue):W683-5	Quadfinder: server for identification and analysis of quadruplex-forming motifs in nucleotide sequences.	http://miracle.igib.res.in/quadfinder/	http://miracle.igib.res.in/quadfinder/.	NA	0	2017:2:7:11:56:39	500	Can't connect to miracle.igib.res.in:80
16845099	2006	Nucleic Acids Res	9.202	12	Europe	PMC1538783	10.1093/nar/gkl234	34(Web Server issue):W692-5	CorGen--measuring and generating long-range correlations for DNA sequence analysis.	http://corgen.molgen.mpg.de	http://corgen.molgen.mpg.de.	NA	1	2017:2:7:11:56:39	200	OK
16845101	2006	Nucleic Acids Res	9.202	105	Asia	PMC1538837	10.1093/nar/gkl043	34(Web Server issue):W70-4	FOLD-RATE: prediction of protein folding rates from amino acid sequence.	http://psfs.cbrc.jp/fold-rate/	http://psfs.cbrc.jp/fold-rate/.	NA	0	2017:2:7:11:56:39	502	Bad Gateway
16845102	2006	Nucleic Acids Res	9.202	218	Europe	PMC1538795	10.1093/nar/gkl042	34(Web Server issue):W700-3	ModelTest Server: a web-based tool for the statistical selection of models of nucleotide substitution online.	http://darwin.uvigo.es/software/modeltest_server.html	http://darwin.uvigo.es/software/modeltest_server.html.	NA	0	2017:2:7:11:56:40	404	Not Found
16845103	2006	Nucleic Acids Res	9.202	104	Europe	PMC1538906	10.1093/nar/gkl129	34(Web Server issue):W704-7	The internal transcribed spacer 2 database--a web server for (not only) low level phylogenetic analyses.	http://its2.bioapps.biozentrum.uni-wuerzburg.de	http://its2.bioapps.biozentrum.uni-wuerzburg.de.	NA	1	2017:2:7:11:56:40	200	OK
16845105	2006	Nucleic Acids Res	9.202	9	North Am	PMC1538809	10.1093/nar/gkl228	34(Web Server issue):W714-9	The Path-A metabolic pathway prediction web server.	http://path-a.cs.ualberta.ca	http://path-a.cs.ualberta.ca) that pred:	NA	0	2017:2:7:11:56:40	500	Can't connect to path-a.cs.ualberta.ca:80
16845106	2006	Nucleic Acids Res	9.202	125	Asia	PMC1538915	10.1093/nar/gkl167	34(Web Server issue):W720-4	KOBAS server: a web-based platform for automated annotation and pathway identification.	http://kobas.cbi.pku.edu.cn	http://kobas.cbi.pku.edu.cn.	NA	1	2017:2:7:11:56:41	200	OK
16845107	2006	Nucleic Acids Res	9.202	10	Europe	PMC1538829	10.1093/nar/gkl196	34(Web Server issue):W725-8	metaSHARK: a WWW platform for interactive exploration of metabolic networks.	http://bioinformatics.leeds.ac.uk/shark/	http://bioinformatics.leeds.ac.uk/shark/.	NA	0	2017:2:7:11:56:42	500	Can't connect to bioinformatics.leeds.ac.uk:80
16845113	2006	Nucleic Acids Res	9.202	11	Europe	PMC1538916	10.1093/nar/gkl292	34(Web Server issue):W75-8	Protein Peeling 2: a web server to convert protein structures into series of protein units.	http://www.ebgm.jussieu.fr/~gelly/index.html	http://www.ebgm.jussieu.fr/~gelly/index.html.	NA	0	2017:2:7:11:56:42	500	read timeout
16845114	2006	Nucleic Acids Res	9.202	13	Europe	PMC1538895	10.1093/nar/gkl216	34(Web Server issue):W79-83	ProSAT2--Protein Structure Annotation Server.	http://projects.villa-bosch.de/mcm/database/prosat2/	http://projects.villa-bosch.de/mcm/database/prosat2/.	NA	1	2017:2:7:11:57:2	200	OK
16845117	2006	Nucleic Acids Res	9.202	14	Asia	PMC1538888	10.1093/nar/gkl264	34(Web Server issue):W95-8	OPAAS: a web server for optimal, permuted, and other alternative alignments of protein structures.	http://opaas.ibms.sinica.edu.tw	http://opaas.ibms.sinica.edu.tw), provides	NA	0	2017:2:7:11:57:2	500	Can't connect to opaas.ibms.sinica.edu.tw:80
16845118	2006	Nucleic Acids Res	9.202	23	Asia	PMC1538878	10.1093/nar/gkl351	34(Web Server issue):W99-103	Localizome: a server for identifying transmembrane topologies and TM helices of eukaryotic proteins utilizing domain information.	http://localizome.org/	http://localizome.org/.	NA	0	2017:2:7:11:57:2	403	Forbidden
16870933	2006	Bioinformatics	5.766	16	Europe	NA	10.1093/bioinformatics/btl409	22(19):2441-3	JVirGel 2.0: computational prediction of proteomes separated via two-dimensional gel electrophoresis under consideration of membrane and secreted proteins.	http://www.jvirgel.de	http://www.jvirgel.de	NA	0	2017:2:7:11:57:4	500	read timeout
16889410	2006	J Proteome Res	4.173	193	Asia	NA	10.1021/pr060167c	5(8):1888-97	Predicting eukaryotic protein subcellular location by fusing optimized evidence-theoretic K-Nearest Neighbor classifiers.	http://202.120.37.186/bioinf/euk-oet	http://202.120.37.186/bioinf/euk-oet for publi	NA	0	2017:2:7:11:57:24	500	read timeout
16893466	2006	BMC Bioinformatics	2.435	742	North Am	PMC1564154	10.1186/1471-2105-7-371	0.549306	UniFrac--an online tool for comparing microbial community diversity in a phylogenetic context.	http://bmf.colorado.edu/unifrac	http://bmf.colorado.edu/unifrac, that allo:	NA	0	2017:2:7:11:57:44	404	Not Found
16894602	2006	Proteins	2.499	27	Asia	NA	10.1002/prot.21062	65(1):49-54	Better prediction of the location of alpha-turns in proteins with support vector machine.	http://bmc.hust.edu.cn/bioinformatics/	http://bmc.hust.edu.cn/bioinformatics/ or http::/:	NA	0	2017:2:7:11:57:44	500	read timeout
16922601	2006	Appl Bioinformatics	NA	34	Europe	NA	10.2165/00822942-200605030-00008	5(3):193-8	REGANOR: a gene prediction server for prokaryotic genomes and a database of high quality gene predictions for prokaryotes.	https://www.cebitec.uni-bielefeld.de/groups/brf/software/reganor/cgi-bin/reganor_	https//www.cebitec.uni-bielefeld.de/groups/brf/software/reganor/cgi-bin/reganor_ upload.cg:	NA	0	2017:2:7:11:58:5	404	Not Found
16922693	2006	In Silico Biol	NA	7	Asia	NA	NA	6(4):307-10	MACO: a gapped-alignment scoring tool for comparing transcription factor binding sites.	www.nicemice.cn/bioinfo/MACO	www.nicemice.cn/bioinfo/MACO. Source co	NA	0	2017:2:7:11:58:6	404	Not Found
16928734	2006	Bioinformatics	5.766	6	Europe	NA	10.1093/bioinformatics/btl454	22(21):2702-3	TESD: a transposable element dynamics simulation environment.	http://pbil.univ-lyon1.fr/software/TESD	http://pbil.univ-lyon1.fr/software/TESD	NA	1	2017:2:7:11:58:7	200	OK
16928735	2006	Bioinformatics	5.766	176	North Am	NA	10.1093/bioinformatics/btl448	22(21):2619-27	Anisotropic network model: systematic evaluation and a new web interface.	http://www.ccbb.pitt.edu/anm	http://www.ccbb.pitt.edu/anm)	NA	1	2017:2:7:11:58:7	200	OK
16928737	2006	Bioinformatics	5.766	22	North Am	NA	10.1093/bioinformatics/btl449	22(21):2691-2	MMM: a sequence-to-structure alignment protocol.	http://www.fiserlab.org/servers/mmm	http://www.fiserlab.org/servers/mmm	NA	1	2017:2:7:11:58:8	200	OK
16940324	2006	Bioinformatics	5.766	28	North Am	NA	10.1093/bioinformatics/btl460	22(21):2693-4	iFold: a platform for interactive folding simulations of proteins.	http://ifold.dokhlab.org	http://ifold.dokhlab.org	NA	1	2017:2:7:11:58:9	200	OK
16953874	2006	BMC Bioinformatics	2.435	51	Europe	PMC1574355	10.1186/1471-2105-7-402	0.570833	Distill: a suite of web servers for the prediction of one-, two- and three-dimensional structural features of proteins.	http://distill.ucd.ie/distill/	http://distill.ucd.ie/distill/.	NA	1	2017:2:7:11:58:9	200	OK
16955516	2006	Proteomics	4.079	53	Asia	NA	10.1002/pmic.200600064	6(19):5099-105	GNBSL: a new integrative system to predict the subcellular location for Gram-negative bacteria proteins.	http://166.111.24.5/webtools/GNBSL/index.htm	http://166.111.24.5/webtools/GNBSL/index.htm.	NA	0	2017:2:7:11:58:9	500	read timeout
16956394	2006	BMC Bioinformatics	2.435	18	Asia	PMC1574353	10.1186/1471-2105-7-404	0.572222	RDMAS: a web server for RNA deleterious mutation analysis.	http://biosrv1.bmi.ac.cn/rdmas	http://biosrv1.bmi.ac.cn/rdmas.	NA	0	2017:2:7:11:58:29	404	Not Found
16983686	2007	J Cell Biochem	3.446	161	Asia	NA	10.1002/jcb.21096	100(3):665-78	Large-scale plant protein subcellular location prediction.	http://www.csbio.sjtu.edu.cn/bioinf/plant-multi/	http://202.120.37.186/bioinf/plant). Furthermo	http://www.csbio.sjtu.edu.cn/bioinf/plant-multi/	1	2017:2:7:11:58:40	200	OK
17013940	2007	Biotechnol Bioeng	4.243	50	Asia	NA	10.1002/bit.21214	97(2):389-96	MODEL-molecular descriptor lab: a web-based server for computing structural and physicochemical features of compounds.	http://jing.cz3.nus.edu.sg/cgi-bin/model/model.cgi	http://jing.cz3.nus.edu.sg/cgi-bin/model/model.cgi free of c:	NA	0	2017:2:7:11:58:40	500	Can't connect to jing.cz3.nus.edu.sg:80
17021161	2006	Bioinformatics	5.766	89	Europe	NA	10.1093/bioinformatics/btl504	22(23):2948-9	FoldUnfold: web server for the prediction of disordered regions in protein chain.	http://skuld.protres.ru/~mlobanov/ogu/ogu.cgi	http://skuld.protres.ru/~mlobanov/ogu/ogu.cgi. There is	NA	0	2017:2:7:11:58:40	503	Service Unavailable
17022656	2006	J Proteome Res	4.173	30	Europe	NA	10.1021/pr060205s	5(10):2849-52	GAPP: a fully automated software for the confident identification of human peptides from tandem mass spectra.	www	www. gapp.info	NA	0	2017:2:7:11:58:44	400	URL must be absolute
17022803	2006	BMC Bioinformatics	2.435	38	Europe	PMC1609187	10.1186/1471-2105-7-431	0.590972	The BiSearch web server.	http://bisearch.enzim.hu	http://bisearch.enzim.hu site. CON:	NA	1	2017:2:7:11:58:44	200	OK
17032674	2006	Bioinformatics	5.766	10	Asia	NA	10.1093/bioinformatics/btl500	22(23):2898-904	Large scale data mining approach for gene-specific standardization of microarray gene expression data.	http://compbio.sookmyung.ac.kr/~lage/	http://compbio.sookmyung.ac.kr/~lage/) was const:	NA	0	2017:2:7:11:58:44	403	Forbidden
17032679	2006	Bioinformatics	5.766	3	Europe	NA	10.1093/bioinformatics/btl487	22(22):2838-40	Integration of gel-based proteome data with pProRep.	http://www.ptools.ua.ac.be/pProRep	http://www.ptools.ua.ac.be/pProRep. The appli:	NA	1	2017:2:7:11:58:46	200	OK
17032685	2006	Bioinformatics	5.766	1	Europe	NA	10.1093/bioinformatics/btl404	22(19):2439-40	APDB: a web server to evaluate the accuracy of sequence alignments using structural information.	http://tcoffee.crg.cat/apps/tcoffee/do:irmsd	www.tcoffee.org. A stand-a	http://tcoffee.crg.cat/apps/tcoffee/do:irmsd	1	2017:2:7:11:58:46	200	OK
17038332	2006	Nucleic Acids Res	9.202	23	North Am	PMC1636493	10.1093/nar/gkl715	34(19):5660-9	Rational design and rapid screening of antisense oligonucleotides for prokaryotic gene modulation.	http://sfold.wadsworth.org	http://sfold.wadsworth.org.	NA	1	2017:2:7:11:58:46	200	OK
17045240	2006	Biochem Biophys Res Commun	NA	56	North Am	PMC2093955	10.1016/j.bbrc.2006.08.199	350(4):818-24	Prediction of Nepsilon-acetylation on internal lysines implemented in Bayesian Discriminant Method.	http://bioinformatics.lcd-ustc.org/pail	http://bioinformatics.lcd-ustc.org/pail.	NA	1	2017:2:7:11:58:46	200	OK
17048397	2006	IEEE/ACM Trans Comput Biol Bioinform	NA	NA	NA	NA	10.1109/TCBB.2006.17	3(2):98-113	Bayesian segmental models with multiple sequence alignment profiles for protein secondary structure and contact map prediction.	http://public.kgi.edu/-wild/bsm.html	http://public.kgi.edu/-wild/bsm.html.	NA	0	2017:2:7:11:58:47	500	Can't connect to public.kgi.edu:80
17050570	2007	Bioinformatics	5.766	811	Europe	NA	10.1093/bioinformatics/btl529	23(1):127-8	Interactive Tree Of Life (iTOL): an online tool for phylogenetic tree display and annotation.	http://itol.embl.de	http://itol.embl.de	NA	1	2017:2:7:11:58:47	200	OK
17052151	2006	Neural Comput	1.626	5	North Am	NA	10.1162/neco.2006.18.12.2923	18(12):2923-7	A distributed computing tool for generating neural simulation databases.	http://neuronpm.homeip.net	http://neuronpm.homeip.net . It is a:	NA	0	2017:2:7:11:58:47	500	Can't connect to neuronpm.homeip.net:80
17065464	2007	Nucleic Acids Res	9.202	12	North Am	PMC1635338	10.1093/nar/gkl809	35(Database issue):D317-21	TOPOFIT-DB, a database of protein structural alignments based on the TOPOFIT method.	http://mozart.bio.neu.edu/topofit/index.php	http://mozart.bio.neu.edu/topofit/index.php.	NA	0	2017:2:7:11:58:47	503	Service Unavailable
17077097	2007	Bioinformatics	5.766	19	Asia	NA	10.1093/bioinformatics/btl523	23(4):524-6	OmicBrowse: a browser of multidimensional omics annotations.	http://omicspace.riken.jp	http://omicspace.riken.jp.	NA	0	2017:2:7:11:58:48	503	Service Unavailable
17077098	2007	Bioinformatics	5.766	14	Europe	NA	10.1093/bioinformatics/btl556	23(1):125-6	GECO--linear visualization for comparative genomics.	http://bioinfo.mikrobio.med.uni-giessen.de/geco2/GecoMainServlet	http://bioinfo.mikrobio.med.uni-giessen.de/geco2/GecoMainServlet	NA	0	2017:2:7:11:58:53	500	read timeout
17083731	2006	BMC Bioinformatics	2.435	28	Asia	PMC1647291	10.1186/1471-2105-7-485	0.628472	Machine learning techniques in disease forecasting: a case study on rice blast prediction.	http://www.imtech.res.in/raghava/rbpred/	http://www.imtech.res.in/raghava/rbpred/.	NA	1	2017:2:7:11:59:13	200	OK
17085479	2007	Nucleic Acids Res	9.202	3	Asia	PMC1781150	10.1093/nar/gkl807	35(Database issue):D47-50	Patome: a database server for biological sequence annotation and analysis in issued patents and published patent applications.	http://www.patome.org/	NA	NA	0	2017:2:7:11:59:14	500	Can't connect to www.patome.org:80
17103018	2006	J Comput Aided Mol Des	NA	22	North Am	PMC2194810	10.1007/s10822-006-9075-x	20(7-8):519-27	Milestones in electron crystallography.	http://www.2dx.unibas.ch/	http://2dx.org) provides	http://www.2dNA.unibas.ch/	1	2017:2:7:11:59:14	200	OK
17108360	2007	Nucleic Acids Res	9.202	19	North Am	PMC1669712	10.1093/nar/gkl781	35(Database issue):D780-5	The Online Bioinformatics Resources Collection at the University of Pittsburgh Health Sciences Library System--a one-stop gateway to online bioinformatics databases and software tools.	http://www.hsls.pitt.edu/guides/genetics/obrc	http://www.hsls.pitt.edu/guides/genetics/obrc).	NA	1	2017:2:7:11:59:15	200	OK
17109407	2007	Proteins	2.499	24	North Am	NA	10.1002/prot.21177	66(3):664-70	MUPRED: a tool for bridging the gap between template based methods and sequence profile based methods for protein secondary structure prediction.	http://digbio.missouri.edu/mupred	http://digbio.missouri.edu/mupred.	NA	1	2017:2:7:11:59:15	200	OK
17109752	2006	BMC Bioinformatics	2.435	40	North Am	PMC1654194	10.1186/1471-2105-7-503	0.640972	Predicting residue contacts using pragmatic correlated mutations method: reducing the false positives.	http://www.ces.clemson.edu/compbio/recon	http://www.ces.clemson.edu/compbio/recon that is f:	NA	0	2017:2:7:11:59:18	404	Not Found
17112313	2006	PLoS Comput Biol	4.587	131	Europe	PMC1636673	10.1371/journal.pcbi.0020155	2(11):e155	3D complex: a structural classification of protein complexes.	http://www.3Dcomplex.org	http://www.3Dcomplex.org, will be a:	NA	1	2017:2:7:11:59:19	200	OK
17120237	2007	Biopolymers	2.248	124	North Am	NA	10.1002/bip.20640	85(3):233-40	Virus-PLoc: a fusion classifier for predicting the subcellular localization of viral proteins within host and virus-infected cells.	http://www.csbio.sjtu.edu.cn/bioinf/virus/	http://202.120.37.186/bioinf/virus for the p	http://www.csbio.sjtu.edu.cn/bioinf/virus/	1	2017:2:7:11:59:19	200	OK
17135191	2007	Nucleic Acids Res	9.202	36	Europe	PMC1747180	10.1093/nar/gkl934	35(Database issue):D690-5	FINDbase: a relational database recording frequencies of genetic defects leading to inherited disorders worldwide.	http://www.findbase.org	http://www.findbase.org) is a rela:	NA	1	2017:2:7:11:59:20	200	OK
17135198	2007	Nucleic Acids Res	9.202	29	Asia	PMC1751554	10.1093/nar/gkl969	35(Database issue):D707-10	Snap: an integrated SNP annotation platform.	http://snap.genomics.org.cn/	http://snap.genomics.org.cn/.	NA	1	2017:2:7:11:59:21	200	OK
17135203	2007	Nucleic Acids Res	9.202	499	Europe	PMC1751541	10.1093/nar/gkl950	35(Database issue):D572-4	MINT: the Molecular INTeraction database.	http://mint.bio.uniroma2.it/mint/	http://mint.bio.uniroma2.it/mint/).	NA	1	2017:2:7:11:59:23	200	OK
17137343	2006	J Proteome Res	4.173	100	Asia	NA	10.1021/pr060404b	5(12):3420-8	Large-scale predictions of gram-negative bacterial protein subcellular locations.	http://www.csbio.sjtu.edu.cn/bioinf/Gneg-multi/	http://202.120.37.186/bioinf/Gneg. To suppor	http://www.csbio.sjtu.edu.cn/bioinf/Gneg-multi/	1	2017:2:7:11:59:23	200	OK
17138585	2007	Bioinformatics	5.766	44	North Am	NA	10.1093/bioinformatics/btl604	23(3):392-3	BioNetBuilder: automatic integration of biological networks.	http://err.bio.nyu.edu/cytoscape/bionetbuilder/	http://err.bio.nyu.edu/cytoscape/bionetbuilder/	NA	0	2017:2:7:11:59:24	500	read timeout
17140269	2006	Appl Bioinformatics	NA	8	Europe	NA	10.2165/00822942-200605040-00005	5(4):225-36	Ontology annotation treebrowser : an interactive tool where the complementarity of medical subject headings and gene ontology improves the interpretation of gene lists.	http://www.ifm.liu.se/bioinfo/oat	http://www.ifm.liu.se/bioinfo/oat.	NA	0	2017:2:7:11:59:44	403	Forbidden
17145741	2007	Bioinformatics	5.766	32	Europe	NA	10.1093/bioinformatics/btl618	23(4):498-9	AutoGRAPH: an interactive web server for automating and visualizing comparative genome maps.	http://genoweb.univ-rennes1.fr/tom_dog/AutoGRAPH/Tutorial.php	http://genoweb.univ-rennes1.fr/tom_dog/AutoGRAPH/Tutorial.php.	NA	1	2017:2:7:11:59:44	200	OK
17148486	2007	Nucleic Acids Res	9.202	18	Europe	PMC1761421	10.1093/nar/gkl1005	35(Database issue):D354-7	PEDANT genome database: 10 years online.	http://pedant.gsf.de	http://pedant.gsf.de.	NA	1	2017:2:7:11:59:45	200	OK
17150996	2007	Bioinformatics	5.766	13	Asia	NA	10.1093/bioinformatics/btl621	23(4):504-6	AllerTool: a web server for predicting allergenicity and allergic cross-reactivity in proteins.	http://research.i2r.a-star.edu.sg/AllerTool/	http://research.i2r.a-star.edu.sg/AllerTool/.	NA	0	2017:2:7:11:59:46	500	Can't connect to research.i2r.a-star.edu.sg:80
17169992	2007	Nucleic Acids Res	9.202	45	North Am	PMC1802606	10.1093/nar/gkl1065	35(2):433-40	More complete gene silencing by fewer siRNAs: transparent optimized design and biophysical signature.	http://optirna.unl.edu/	http://optirna.unl.edu/.	NA	1	2017:2:7:11:59:46	200	OK
17172695	2007	Methods Mol Biol	NA	10	NA	NA	10.1385/1-59745-214-9:297	357:297-305	Proteomic analysis of foam cells.	http://us.expasy.org	http://us.expasy.org). The exper:	NA	1	2017:2:7:11:59:47	200	OK
17178561	2006	Autoimmunity	2.917	2	Oceania	NA	10.1080/08916930601062494	39(8):645-50	PREDNOD, a prediction server for peptide binding to the H-2g7 haplotype of the non-obese diabetic mouse.	http://antigen.i2r.a-star.edu.sg/Ag7	http://antigen.i2r.a-star.edu.sg/Ag7.	NA	0	2017:2:7:11:59:47	500	read timeout
17183482	2006	Genet Mol Res	0.764	15	South Am	NA	NA	5(4):717-22	The Star STING server: a multiplatform environment for protein structure analysis.	http://sms.cbi.cnptia.embrapa.br/SMS/	http://sms.cbi.cnptia.embrapa.br/SMS/, http://tr:	NA	1	2017:2:7:12:0:8	200	OK
17185755	2007	Methods Mol Biol	NA	1	North Am	NA	10.1385/1-59745-377-3:25	373:25-38	Web-based primer design software for genome-scale genotyping by pyrosequencing.	http://imgen.ccbb.pitt.edu	http://imgen.ccbb.pitt.edu.	NA	0	2017:2:7:12:0:9	500	read timeout
17189477	2007	Protein Sci	3.039	47	Europe	PMC2203286	10.1110/ps.062538707	16(2):239-49	Redesigning protein pKa values.	http://enzyme.ucd.ie/pKD	http://enzyme.ucd.ie/pKD.	NA	0	2017:2:7:12:0:29	404	Not Found
17199898	2007	BMC Bioinformatics	2.435	95	Europe	PMC1774580	10.1186/1471-2105-8-2	08:02:00	TPRpred: a tool for prediction of TPR-, PPR- and SEL1-like repeats from protein sequences.	https://toolkit.tuebingen.mpg.de/tprpred	http://tprpred.tuebingen.mpg.de, and the	https://toolkit.tuebingen.mpg.de/tprpred	1	2017:2:7:12:0:30	200	OK
17204464	2007	Bioinformatics	5.766	9	North Am	NA	10.1093/bioinformatics/btl603	23(3):383-4	SChiSM2: creating interactive web page annotations of molecular structure models using Jmol.	http://ci.vbi.vt.edu/cammer/schism2.html	http://ci.vbi.vt.edu/cammer/schism2.html.	NA	0	2017:2:7:12:0:30	503	Service Unavailable
17207271	2007	BMC Bioinformatics	2.435	143	Europe	PMC1780059	10.1186/1471-2105-8-4	08:04:00	VaxiJen: a server for prediction of protective antigens, tumour antigens and subunit vaccines.	http://www.jenner.ac.uk/VaxiJen	http://www.jenner.ac.uk/VaxiJen.	NA	0	2017:2:7:12:0:31	404	Not Found
17217510	2006	BMC Bioinformatics	2.435	15	North Am	PMC1780113	10.1186/1471-2105-7-S4-S1810.1186/1474-2105-7-S4-S18	7 Suppl 4:S18	GenomeBlast: a web tool for small genome comparison.	http://bioinfo-srv1.awh.unomaha.edu/genomeblast/	http://bioinfo-srv1.awh.unomaha.edu/genomeblast/.	NA	0	2017:2:7:12:0:31	404	Not Found
17218127	2007	Fungal Genet Biol	2.933	14	Europe	NA	10.1016/j.fgb.2006.11.010	44(4):231-41	Separation of sequences from host-pathogen interface using triplet nucleotide frequencies.	http://mips.gsf.de/proj/est3	http://mips.gsf.de/proj/est3).	NA	1	2017:2:7:12:0:31	200	OK
17222345	2007	Biol Direct	3.016	NA	NA	PMC1783638	10.1186/1745-6150-2-1	02:01:00	pkaPS: prediction of protein kinase A phosphorylation sites with the simplified kinase-substrate binding model.	http://mendel.imp.univie.ac.at/sat/pkaPS	http://mendel.imp.univie.ac.at/sat/pkaPS. REVIEWERS:	NA	1	2017:2:7:12:0:32	200	OK
17235453	2007	Amino Acids	3.196	119	North Am	NA	10.1007/s00726-006-0478-8	33(1):57-67	Euk-PLoc: an ensemble classifier for large-scale eukaryotic protein subcellular location prediction.	http://202.120.37.186/bioinf/euk	http://202.120.37.186/bioinf/euk . Further	NA	0	2017:2:7:12:0:32	500	read timeout
17237055	2007	Bioinformatics	5.766	11	North Am	NA	10.1093/bioinformatics/btl679	23(5):637-8	SMotif: a server for structural motifs in proteins.	http://caps.ncbs.res.in/SMotif/index.html	http://caps.ncbs.res.in/SMotif/index.html. SUPPLEMEN:	NA	1	2017:2:7:12:0:52	200	OK
17237066	2007	Bioinformatics	5.766	249	Europe	NA	10.1093/bioinformatics/btl677	23(5):538-44	Improving the accuracy of transmembrane protein topology prediction using evolutionary information.	http://bioinf.cs.ucl.ac.uk/memsat	http://bioinf.cs.ucl.ac.uk/memsat. Both the	NA	0	2017:2:7:12:0:52	404	Not Found
17237068	2007	Bioinformatics	5.766	94	North Am	NA	10.1093/bioinformatics/btl672	23(5):634-6	DP-Bind: a web server for sequence-based prediction of DNA-binding residues in DNA-binding proteins.	http://lcg.rit.albany.edu/dp-bind/	http://lcg.rit.albany.edu/dp-bind/dpbind_supplement.html.	http://lcg.rit.albany.edu/dp-bind/	1	2017:2:7:12:0:53	200	OK
17237073	2007	Bioinformatics	5.766	27	Europe	PMC2989875	10.1093/bioinformatics/btl650	23(12):1568-70	ProServer: a simple, extensible Perl DAS server.	http://www.sanger.ac.uk/proserver/	http://www.sanger.ac.uk/proserver/.	NA	1	2017:2:7:12:0:53	200	OK
17237077	2007	Bioinformatics	5.766	19	Europe	NA	10.1093/bioinformatics/btl307	23(2):e110-5	Phylogenetic reconstruction from non-genomic data.	http://www.jaist.ac.jp/~clemente/cgi-bin/phylo.pl	http://www.jaist.ac.jp/~clemente/cgi-bin/phylo.pl. It is ava:	NA	1	2017:2:7:12:0:53	200	OK
17237093	2007	Bioinformatics	5.766	48	Europe	NA	10.1093/bioinformatics/btl294	23(2):e205-11	Vorolign--fast structural alignment using Voronoi contacts.	http://www.bio.ifi.lmu.de/Vorolign	http://www.bio.ifi.lmu.de/Vorolign	NA	0	2017:2:7:12:0:56	404	Not Found
17238471	2006	AMIA Annu Symp Proc	NA	NA	North Am	PMC1839508	NA	NA	UMLSKS SUGGEST: an auto-complete feature for the UMLSKS interface using AJAX.	http://ajaxpatterns.org/Suggestion	NA	NA	0	2017:2:7:12:0:56	500	read timeout
17239823	2007	Biochem Biophys Res Commun	NA	6	Asia	NA	10.1016/j.bbrc.2007.01.002	354(2):498-504	Construction of mathematical model for high-level expression of foreign genes in pPIC9 vector and its verification.	http://ppic9.med.stu.edu.cn/ppic9	http://ppic9.med.stu.edu.cn/ppic9.	NA	0	2017:2:7:12:1:17	500	read timeout
17244638	2007	Protein Eng Des Sel	2.364	115	North Am	NA	10.1093/protein/gzl053	20(1):39-46	Gpos-PLoc: an ensemble classifier for predicting subcellular localization of Gram-positive bacterial proteins.	http://www.csbio.sjtu.edu.cn/bioinf/Gpos-multi/	http://202.120.37.186/bioinf/Gpos/. To suppor	http://www.csbio.sjtu.edu.cn/bioinf/Gpos-multi/	1	2017:2:7:12:1:39	200	OK
17252170	2007	J Digit Imaging	1.406	2	Europe	PMC3043915	10.1007/s10278-006-1044-3	20(4):393-401	Online availability check of teleradiology components.	http://www.teleradiologie-rnd.de	http://www.teleradiologie-rnd.de). In case o:	NA	1	2017:2:7:12:1:39	200	OK
17254297	2006	BMC Bioinformatics	2.435	29	Asia	PMC1764469	10.1186/1471-2105-7-S5-S13	7 Suppl 5:S13	Prediction of the functional class of metal-binding proteins from sequence derived physicochemical properties by support vector machine approach.	http://jing.cz3.nus.edu.sg/cgi-bin/svmprot.cgi	http://jing.cz3.nus.edu.sg/cgi-bin/svmprot.cgi.	NA	0	2017:2:7:12:1:40	500	Can't connect to jing.cz3.nus.edu.sg:80
17254300	2006	BMC Bioinformatics	2.435	17	Asia	PMC1764472	10.1186/1471-2105-7-S5-S16	7 Suppl 5:S16	SPIDer: Saccharomyces protein-protein interaction database.	http://cmb.bnu.edu.cn/SPIDer/index.html	http://cmb.bnu.edu.cn/SPIDer/index.html. CONCLUSIO:	NA	1	2017:2:7:12:1:40	200	OK
17267437	2007	Bioinformatics	5.766	176	North Am	NA	10.1093/bioinformatics/btm017	23(7):802-8	PROMALS: towards accurate multiple sequence alignments of distantly related proteins.	http://prodata.swmed.edu/promals/	http://prodata.swmed.edu/promals/. SUPPLEMEN:	NA	1	2017:2:7:12:1:41	200	OK
17270240	2007	Hum Pathol	2.791	47	Europe	NA	10.1016/j.humpath.2006.10.006	38(4):546-54	Feasibility and diagnostic agreement in teledermatopathology using a virtual slide system.	http://telederm.org/research/dermatopath/	http://telederm.org/research/dermatopath/) runs. Twe:	NA	1	2017:2:7:12:1:42	200	OK
17277334	2007	Bioinformatics	5.766	15	Europe	NA	10.1093/bioinformatics/btm014	23(7):901-2	DFprot: a webtool for predicting local chain deformability.	http://sbg.cib.csic.es/Software/DFprot	http://sbg.cib.csic.es/Software/DFprot.	NA	0	2017:2:7:12:1:43	503	Service Unavailable
17282770	2005	Conf Proc IEEE Eng Med Biol Soc	NA	NA	NA	NA	10.1109/IEMBS.2005.1617001	3:2599-602	UMass Morph Server: Macromolecular Dynamics Analyses Using Elastic Network Models.	http://biomechanics.ecs.umass.edu/umms.html	http://biomechanics.ecs.umass.edu/umms.html.	NA	0	2017:2:7:12:1:46	500	Can't connect to biomechanics.ecs.umass.edu:80
17282998	2007	Bioinformatics	5.766	67	Europe	NA	10.1093/bioinformatics/btm020	23(7):895-7	NetPhosYeast: prediction of protein phosphorylation sites in yeast.	http://www.cbs.dtu.dk/services/NetPhosYeast/	http://www.cbs.dtu.dk/services/NetPhosYeast/.	NA	1	2017:2:7:12:1:46	200	OK
17286447	2007	Mol Diagn Ther	2.602	2	North Am	NA	NA	11(1):15-9	The BiolAD-DB system : an informatics system for clinical and genetic data.	http://www.rockefeller.edu/biolad-db/	http://www.rockefeller.edu/biolad-db/.	NA	1	2017:2:7:12:1:46	200	OK
17299728	2007	J Comput Chem	3.648	NA	NA	NA	10.1002/jcc.20642	28(7):1290-305	Vibalizer: a free, web-based tool for rapid, quantitative comparison and analysis of calculated vibrational modes.	http://www.compchem.org	http://www.compchem.org, and it is:	NA	1	2017:2:7:12:1:47	200	OK
17305449	2007	Cyberpsychol Behav	NA	5	Europe	NA	10.1089/cpb.2006.9992	10(1):57-63	Special online consulting for patients with eating disorders and their relatives: analysis of user characteristics and E-mail content.	www.ab-server.de	www.ab-server.de) has exist	NA	1	2017:2:7:12:1:48	200	OK
17308342	2007	Bioinformatics	5.766	23	North Am	NA	10.1093/bioinformatics/btm047	23(8):1032-4	ClusterDraw web server: a tool to identify and visualize clusters of binding motifs for transcription factors.	http://line.bioinfolab.net/webgate/submit.cgi	http://flydev.berkeley.edu/cgi-bin/cld/submit.cgi	http://line.bioinfolab.net/webgate/submit.cgi	1	2017:2:7:12:1:48	200	OK
17309896	2007	Bioinformatics	5.766	122	Europe	NA	10.1093/bioinformatics/btm039	23(8):1026-8	Gepard: a rapid and sensitive tool for creating dotplots on genome scale.	http://cube.univie.ac.at/gepard	http://mips.gsf.de/services/analysis/gepard	http://cube.univie.ac.at/gepard	1	2017:2:7:12:1:50	200	OK
17311562	2006	Curr Drug Discov Technol	NA	1	Europe	NA	10.2174/157016306780136754	3(3):167-73	Align: a C++ class library and web server for rapid sequence alignment prototyping.	http://protein.cribi.unipd.it/align/	http://protein.cribi.unipd.it/align/. A sample	NA	1	2017:2:7:12:1:51	200	OK
17320487	2007	Infect Genet Evol	2.591	4	Europe	NA	10.1016/j.meegid.2007.01.006	7(4):463-8	genoBASE pylori: a genotype search tool and database of the human gastric pathogen Helicobacter pylori.	http://www.cdfd.org.in/amplibase/HP	http://www.cdfd.org.in/amplibase/HP).	NA	0	2017:2:7:12:1:51	404	Not Found
17324296	2007	BMC Bioinformatics	2.435	322	Europe	PMC1828741	10.1186/1471-2105-8-65	0.378472	AGGRESCAN: a server for the prediction and evaluation of hot spots of aggregation in polypeptides.	http://bioinf.uab.es/aggrescan/	http://bioinf.uab.es/aggrescan/ shall fac	NA	1	2017:2:7:12:1:51	200	OK
17332022	2007	Bioinformatics	5.766	120	Europe	NA	10.1093/bioinformatics/btm066	23(9):1159-60	NucPred--predicting nuclear localization of proteins.	http://www.sbc.su.se/~maccallr/nucpred	http://www.sbc.su.se/~maccallr/nucpred. In additi:	NA	1	2017:2:7:12:1:51	200	OK
17346678	2007	Biochem Biophys Res Commun	NA	166	North Am	NA	10.1016/j.bbrc.2007.02.071	355(4):1006-11	Hum-mPLoc: an ensemble classifier for large-scale human protein subcellular location prediction by incorporating samples with multiple sites.	http://www.csbio.sjtu.edu.cn/bioinf/hum-multi-2/	http://202.120.37.186/bioinf/hum-multi. Meanwhile	http://www.csbio.sjtu.edu.cn/bioinf/hum-multi-2/	1	2017:2:7:12:1:52	200	OK
17351888	2007	Proteomics	4.079	14	Europe	NA	10.1002/pmic.200600952	7(7):1117-20	Yeast proteome map (update 2006).	www.ibgc.u-bordeaux2.fr/YPM	www.ibgc.u-bordeaux2.fr/YPM).	NA	1	2017:2:7:12:1:53	200	OK
17370309	2007	Hum Mutat	5.089	18	Oceania	NA	10.1002/humu.20474	28(7):654-9	PKDB: Polycystic Kidney Disease Mutation Database--a gene variant database for autosomal dominant polycystic kidney disease.	http://pkdb.mayo.edu	http://pkdb.mayo.edu.	NA	1	2017:2:7:12:1:53	200	OK
17379687	2007	Bioinformatics	5.766	71	Asia	NA	10.1093/bioinformatics/btm100	23(10):1292-3	iPTREE-STAB: interpretable decision tree based method for predicting protein stability changes upon mutations.	http://210.60.98.19/IPTREEr/iptree.htm	http://bioinformatics.myweb.hinet.net/iptree.htm. SUPPLEMEN:	http://210.60.98.19/IPTREEr/iptree.htm	1	2017:2:7:12:1:53	200	OK
17379689	2007	Bioinformatics	5.766	74	Asia	NA	10.1093/bioinformatics/btm097	23(10):1181-7	IMEx: Imperfect Microsatellite Extractor.	http://14.139.82.200/IMEX/index.html	http://203.197.254.154/IMEX/ or http:/	http://14.139.82.200/IMENA/indeNA.html	0	2017:2:7:12:1:55	503	Service Unavailable
17379694	2007	Bioinformatics	5.766	19	Europe	NA	10.1093/bioinformatics/btm089	23(10):1203-10	AutoSCOP: automated prediction of SCOP classifications using unique pattern-class mappings.	http://www.bio.ifi.lmu.de/autoscop	http://www.bio.ifi.lmu.de/autoscop.	NA	0	2017:2:7:12:1:59	404	Not Found
17380508	2007	Proteins	2.499	26	Asia	NA	10.1002/prot.21332	67(4):1167-78	Computational protocol for predicting the binding affinities of zinc containing metalloprotein-ligand complexes.	www.scfbio-iitd.res.in/software/drugdesign/bapplz.jsp	www.scfbio-iitd.res.in/software/drugdesign/bapplz.jsp as BAPPL-	NA	1	2017:2:7:12:1:59	200	OK
17384424	2007	Bioinformatics	5.766	38	Asia	NA	10.1093/bioinformatics/btm119	23(12):1444-50	Finding new structural and sequence attributes to predict possible disease association of single amino acid polymorphism (SAP).	http://sapred.cbi.pku.edu.cn/	http://sapred.cbi.pku.edu.cn/	NA	0	2017:2:7:12:2:2	503	Service Unavailable
17384427	2007	Bioinformatics	5.766	59	Asia	NA	10.1093/bioinformatics/btm061	23(8):942-9	POPI: predicting immunogenicity of MHC class I binding peptides by mining informative physicochemical properties.	http://iclab.life.nctu.edu.tw/POPI	http://iclab.life.nctu.edu.tw/POPI	NA	1	2017:2:7:12:2:3	200	OK
17392329	2007	Bioinformatics	5.766	24	North Am	NA	10.1093/bioinformatics/btm114	23(10):1195-202	A fast and flexible approach to oligonucleotide probe design for genomes and gene families.	http://www.uhnresearch.ca/labs/tillier/ProDesign/ProDesign.html	http://www.uhnresearch.ca/labs/tillier/ProDesign/ProDesign.html. SUPPLEMEN:	NA	1	2017:2:7:12:2:5	200	OK
17394030	2007	J Mol Model	1.438	20	Europe	NA	10.1007/s00894-007-0191-x	13(6-7):665-75	Localization of ligand binding site in proteins identified in silico.	http://www.bioinformatics.cm-uj.krakow.pl/activesite	http://www.bioinformatics.cm-uj.krakow.pl/activesite. The impli:	NA	1	2017:2:7:12:2:6	200	OK
17397056	2007	Proteins	2.499	52	North Am	NA	10.1002/prot.21408	68(1):76-81	Real-SPINE: an integrated system of neural networks for real-value prediction of protein structural properties.	http://sparks.informatics.iupui.edu	http://sparks.informatics.iupui.edu.	NA	0	2017:2:7:12:2:6	500	read timeout
17397210	2007	J Proteome Res	4.173	254	Asia	NA	10.1021/pr060635i	6(5):1728-34	Euk-mPLoc: a fusion classifier for large-scale eukaryotic protein subcellular location prediction by incorporating multiple sites.	http://www.csbio.sjtu.edu.cn/bioinf/euk-multi/	http://202.120.37.186/bioinf/euk-multi. Meanwhile	http://www.csbio.sjtu.edu.cn/bioinf/euk-multi/	1	2017:2:7:12:2:26	200	OK
17400726	2007	Bioinformatics	5.766	20	North Am	NA	10.1093/bioinformatics/btm126	23(12):1559-61	SCEPTRANS: an online tool for analyzing periodic transcription in yeast.	http://sceptrans.org/	http://sceptrans.org/	NA	1	2017:2:7:12:2:27	200	OK
17407596	2007	BMC Bioinformatics	2.435	84	Europe	PMC1853114	10.1186/1471-2105-8-114	0.4125	From genes to functional classes in the study of biological systems.	http://www.babelomics.org	http://www.babelomics.org.	NA	1	2017:2:7:12:2:31	200	OK
17410973	2006	Promot Educ	NA	6	Europe	NA	NA	13(4):230-5	The Well-being Profile--an Internet tool for school health promotion.	www2.edu.fi/hyvinvointiprofiili	www2.edu.fi/hyvinvointiprofiili) and its	NA	0	2017:2:7:12:2:33	400	URL must be absolute
17426352	2007	Neuroinformatics	2.864	16	Europe	NA	10.1385/NI:5:1:35	5(1):35-58	Toward a workbench for rodent brain image data: systems architecture and design.	http://	http:// rbwb.org/	NA	0	2017:2:7:12:2:33	500	No Host option provided
17426383	2007	J Biosci	NA	11	Europe	NA	10.1007/s12038-007-0009-0	32(1):97-100	SURF'S UP: - protein classification by surface comparisons.	http://asia.genesilico.pl/surfs_up/	http://asia.genesilico.pl/surfs_up/.	NA	1	2017:2:7:12:2:33	200	OK
17430199	2007	Curr Protein Pept Sci	NA	32	Europe	NA	10.2174/138920307780363415	8(2):181-8	Computer-assisted protein domain boundary prediction using the DomPred server.	http://bioinf.cs.ucl.ac.uk/software.html	http://bioinf.cs.ucl.ac.uk/software.html.	NA	0	2017:2:7:12:2:33	404	Not Found
17430570	2007	BMC Bioinformatics	2.435	3	Europe	PMC1885855	10.1186/1471-2105-8-S1-S3	8 Suppl 1:S3	A computational approach for detecting peptidases and their specific inhibitors at the genome level.	http://gpcr.biocomp.unibo.it/cgi/predictors/hippie/pred_hippie.cgi	http://gpcr.biocomp.unibo.it/cgi/predictors/hippie/pred_hippie.cgi.	NA	1	2017:2:7:12:2:33	200	OK
17430573	2007	BMC Bioinformatics	2.435	20	Europe	PMC1885858	10.1186/1471-2105-8-S1-S6	8 Suppl 1:S6	The MEPS server for identifying protein conformational epitopes.	http://www.caspur.it/meps	http://www.caspur.it/meps, will be a:	NA	0	2017:2:7:12:2:33	404	Not Found
17434148	2007	Biochem Biophys Res Commun	NA	306	Asia	NA	10.1016/j.bbrc.2007.03.162	357(3):633-40	Signal-CF: a subsite-coupled and window-fusing approach for predicting signal peptides.	http://chou.med.harvard.edu/bioinf/Signal-CF/	http://chou.med.harvard.edu/bioinf/Signal-CF/ or http::/:	NA	1	2017:2:7:12:2:34	200	OK
17434469	2006	Cell Immunol	2.399	42	Europe	NA	10.1016/j.cellimm.2007.02.012	244(2):97-100	Bioinformatics applied to allergy: allergen databases, from collecting sequence information to data integration. The Allergome platform as a model.	www.allergome.org	www.allergome.org) represent	NA	1	2017:2:7:12:2:35	200	OK
17439966	2007	Nucleic Acids Res	9.202	12	Europe	PMC1933201	10.1093/nar/gkm220	35(Web Server issue):W148-51	Wheat Estimated Transcript Server (WhETS): a tool to provide best estimate of hexaploid wheat transcript sequence.	http://www4.rothamsted.bbsrc.ac.uk/whets	http://www4.rothamsted.bbsrc.ac.uk/whets.	NA	0	2017:2:7:12:2:36	500	Can't connect to www4.rothamsted.bbsrc.ac.uk:80
17439967	2007	Nucleic Acids Res	9.202	182	Europe	PMC1933141	10.1093/nar/gkm219	35(Web Server issue):W126-31	OPTIMIZER: a web server for optimizing the codon United Statesge of DNA sequences.	http://genomes.urv.es/OPTIMIZER	http://genomes.urv.es/OPTIMIZER.	NA	1	2017:2:7:12:2:36	200	OK
17445272	2007	BMC Bioinformatics	2.435	25	North Am	PMC1868039	10.1186/1471-2105-8-129	0.422917	CGKB: an annotation knowledge base for cowpea (Vigna unguiculata L.) methylation filtered genomic genespace sequences.	http://cowpeagenomics.med.virginia.edu/CGKB/	http://cowpeagenomics.med.virginia.edu/CGKB/.	NA	0	2017:2:7:12:2:36	503	Service Unavailable
17448245	2007	BMC Infect Dis	2.69	7	Europe	PMC1868736	10.1186/1471-2334-7-32	07:32:00	epiPATH: an information system for the storage and management of molecular epidemiology data from infectious pathogens.	http://genevo.uv.es/epipath	http://genevo.uv.es/epipath.	NA	0	2017:2:7:12:2:37	500	read timeout
17452345	2007	Nucleic Acids Res	9.202	38	North Am	PMC1933189	10.1093/nar/gkm227	35(Web Server issue):W649-52	PROMALS web server for accurate multiple protein sequence alignments.	http://prodata.swmed.edu/promals/	http://prodata.swmed.edu/promals/	NA	1	2017:2:7:12:2:57	200	OK
17452346	2007	Nucleic Acids Res	9.202	NA	NA	PMC1933211	10.1093/nar/gkm224	35(Web Server issue):W38-42	Phylemon: a suite of web tools for molecular evolution, phylogenetics and phylogenomics.	http://phylemon.bioinfo.cipf.es	http://phylemon.bioinfo.cipf.es.	NA	1	2017:2:7:12:2:57	200	OK
17452348	2007	Nucleic Acids Res	9.202	36	North Am	PMC1933238	10.1093/nar/gkm221	35(Web Server issue):W12-5	eTBLAST: a web server to identify expert reviewers, appropriate journals and similar publications.	http://invention.swmed.edu/etblast/etblast.shtml	http://invention.swmed.edu/etblast/etblast.shtml, where use:	NA	0	2017:2:7:12:2:58	500	read timeout
17452349	2007	Nucleic Acids Res	9.202	NA	NA	PMC1933236	10.1093/nar/gkm218	35(Web Server issue):W310-3	INFO-RNA--a server for fast inverse RNA folding satisfying sequence constraints.	http://www.bioinf.uni-freiburg.de/Software/INFO-RNA/	http://www.bioinf.uni-freiburg.de/Software/INFO-RNA/	NA	1	2017:2:7:12:3:21	200	OK
17452350	2007	Nucleic Acids Res	9.202	2068	North Am	PMC1933162	10.1093/nar/gkm216	35(Web Server issue):W375-83	MolProbity: all-atom contacts and structure validation for proteins and nucleic acids.	http://molprobity.biochem.duke.edu	http://molprobity.biochem.duke.edu.	NA	1	2017:2:7:12:3:21	200	OK
17456745	2007	Protein Sci	3.039	30	North Am	PMC2206635	10.1110/ps.062597307	16(5):947-55	DDOMAIN: Dividing structures into domains using a normalized domain-domain interaction profile.	http://sparks.informatics.iupui.edu	http://sparks.informatics.iupui.edu.	NA	0	2017:2:7:12:3:22	500	read timeout
17468499	2007	Nucleic Acids Res	9.202	23	Europe	PMC1933149	10.1093/nar/gkm257	35(Web Server issue):W81-5	ISACGH: a web-based environment for the analysis of Array CGH and gene expression which includes functional profiling.	http://isacgh.bioinfo.cipf.es	http://isacgh.bioinfo.cipf.es or within:	NA	1	2017:2:7:12:3:42	200	OK
17478497	2007	Nucleic Acids Res	9.202	244	North Am	PMC1933206	10.1093/nar/gkm272	35(Web Server issue):W253-8	STAMP: a web tool for exploring DNA-binding motif similarities.	http://www.benoslab.pitt.edu/stamp	http://www.benoslab.pitt.edu/stamp.	NA	1	2017:2:7:12:3:43	200	OK
17478500	2007	Nucleic Acids Res	9.202	29	Asia	PMC1933231	10.1093/nar/gkm266	35(Web Server issue):W549-55	MODPROPEP: a program for knowledge-based modeling of protein-peptide complexes.	http://www.nii.res.in/modpropep.html	http://www.nii.res.in/modpropep.html.	NA	0	2017:2:7:12:3:44	404	Not Found
17478501	2007	Nucleic Acids Res	9.202	NA	NA	PMC1933160	10.1093/nar/gkm264	35(Web Server issue):W411-5	QSCOP-BLAST--fast retrieval of quantified structural information for protein sequences of unknown structure.	http://qscop-blast.services.came.sbg.ac.at/	http://qscop-blast.services.came.sbg.ac.at/	NA	0	2017:2:7:12:3:45	500	Can't connect to qscop-blast.services.came.sbg.ac.at:80
17478505	2007	Nucleic Acids Res	9.202	NA	NA	PMC1933184	10.1093/nar/gkm258	35(Web Server issue):W320-4	pknotsRG: RNA pseudoknot folding including near-optimal structures and sliding windows.	http://bibiserv.techfak.uni-bielefeld.de/pkiss	http://bibiserv.techfak.uni-bielefeld.de/pknotsrg).	http://bibiserv.techfak.uni-bielefeld.de/pkiss	1	2017:2:7:12:3:45	200	OK
17478506	2007	Nucleic Acids Res	9.202	24	Asia	PMC1933233	10.1093/nar/gkm252	35(Web Server issue):W503-5	PAR-3D: a server to predict protein active site residues.	http://sunserver.cdfd.org.in:8080/protease/PAR_3D/index.html	http://sunserver.cdfd.org.in::8080/protease/PAR_3D/index.html) is a web-:	NA	0	2017:2:7:12:3:45	500	Can't connect to sunserver.cdfd.org.in:8080
17478507	2007	Nucleic Acids Res	9.202	298	North Am	PMC1904280	10.1093/nar/gkm251	35(10):3375-82	LOMETS: a local meta-threading-server for protein structure prediction.	http://zhanglab.ccmb.med.umich.edu/LOMETS/	http://zhang.bioinformatics.ku.edu/LOMETS.	http://zhanglab.ccmb.med.umich.edu/LOMETS/	1	2017:2:7:12:4:26	200	OK
17478515	2007	Nucleic Acids Res	9.202	NA	NA	PMC1933153	10.1093/nar/gkm226	35(Web Server issue):W193-200	g:Profiler--a web-based toolset for functional profiling of gene lists from large-scale experiments.	http://biit.cs.ut.ee/gprofiler/	http://biit.cs.ut.ee/gprofiler/) is a publ	NA	1	2017:2:7:12:4:27	200	OK
17478516	2007	Nucleic Acids Res	9.202	45	North Am	PMC1933178	10.1093/nar/gkm223	35(Web Server issue):W212-6	Update of the G2D tool for prioritization of gene candidates to inherited diseases.	http://www.ogic.ca/projects/g2d_2/	http://www.ogic.ca/projects/g2d_2/	NA	1	2017:2:7:12:4:28	200	OK
17478517	2007	Nucleic Acids Res	9.202	9	Asia	PMC1933199	10.1093/nar/gkm217	35(Web Server issue):W47-51	RF-DYMHC: detecting the yeast meiotic recombination hotspots and coldspots by random forest model using gapped dinucleotide composition features.	http://www.bioinf.seu.edu.cn/Recombination/rf_dymhc.htm	http://www.bioinf.seu.edu.cn/Recombination/rf_dymhc.htm. Given a y:	NA	0	2017:2:7:12:4:29	500	read timeout
17483510	2007	Nucleic Acids Res	9.202	117	North Am	PMC1933119	10.1093/nar/gkm294	35(Web Server issue):W578-84	RNABindR: a server for analyzing and predicting RNA-binding sites in proteins.	http://ailab1.ist.psu.edu/RNABindRPlus/	http://bindr.gdcb.iastate.edu/RNABindR.	http://ailab1.ist.psu.edu/RNABindRPlus/	1	2017:2:7:12:4:50	200	OK
17483511	2007	Nucleic Acids Res	9.202	NA	NA	PMC1933239	10.1093/nar/gkm287	35(Web Server issue):W613-8	MetaPath Online: a web server implementation of the network expansion algorithm.	http://scopes.biologie.hu-berlin.de	http://scopes.biologie.hu-berlin.de.	NA	1	2017:2:7:12:4:50	200	OK
17483518	2007	Nucleic Acids Res	9.202	409	Europe	PMC1933244	10.1093/nar/gkm256	35(Web Server issue):W429-32	Advantages of combined transmembrane topology and signal peptide prediction--the Phobius web server.	http://phobius.binf.ku.dk	http://phobius.binf.ku.dk) to access:	NA	1	2017:2:7:12:4:51	200	OK
17485426	2007	Bioinformatics	5.766	6	North Am	NA	10.1093/bioinformatics/btm238	23(14):1843-5	CRCView: a web server for analyzing and visualizing microarray gene expression data using model-based clustering.	http://helab.bioinformatics.med.umich.edu/crcview/	http://helab.bioinformatics.med.umich.edu/crcview/.	NA	0	2017:2:7:12:4:51	500	read timeout
17485469	2007	Nucleic Acids Res	9.202	39	North Am	PMC1933179	10.1093/nar/gkm328	35(Web Server issue):W531-7	The RCI server: rapid and accurate calculation of protein flexibility using chemical shifts.	http://wishart.biology.ualberta.ca/rci	http://wishart.biology.ualberta.ca/rci.	NA	1	2017:2:7:12:5:11	200	OK
17485471	2007	Nucleic Acids Res	9.202	70	North Am	PMC1933170	10.1093/nar/gkm310	35(Web Server issue):W259-64	SCOPE: a web server for practical de novo motif discovery.	http://genie.dartmouth.edu/scope>	http://genie.dartmouth.edu/scope>.	NA	0	2017:2:7:12:5:12	404	Not Found
17485474	2007	Nucleic Acids Res	9.202	NA	NA	PMC1933191	10.1093/nar/gkm296	35(Web Server issue):W451-4	SH3-Hunter: discovery of SH3 domain interaction sites in proteins.	http://cbm.bio.uniroma2.it/SH3-Hunter/	http://cbm.bio.uniroma2.it/SH3-Hunter/) is a web	NA	0	2017:2:7:12:5:13	500	read timeout
17485476	2007	Nucleic Acids Res	9.202	NA	NA	PMC1933144	10.1093/nar/gkm288	35(Web Server issue):W438-43	fastSCOP: a fast web server for recognizing protein structural domains and SCOP superfamilies.	http://fastSCOP.life.nctu.edu.tw	http://fastSCOP.life.nctu.edu.tw.	NA	1	2017:2:7:12:5:33	200	OK
17485477	2007	Nucleic Acids Res	9.202	206	Asia	PMC1933203	10.1093/nar/gkm286	35(Web Server issue):W265-8	LTR_FINDER: an efficient tool for the prediction of full-length LTR retrotransposons.	http://tlife.fudan.edu.cn/ltr_finder/	http://tlife.fudan.edu.cn/ltr_finder/.	NA	1	2017:2:7:12:5:35	200	OK
17485479	2007	Nucleic Acids Res	9.202	6	North Am	PMC1933135	10.1093/nar/gkm267	35(Web Server issue):W675-7	eProbalign: generation and manipulation of multiple sequence alignments using partition function posterior probabilities.	http://probalign.njit.edu	http://probalign.njit.edu.	NA	1	2017:2:7:12:5:37	200	OK
17488521	2007	BMC Biol	6.967	287	North Am	PMC1878469	10.1186/1741-7007-5-17	05:17:00	Ab initio modeling of small proteins by iterative TASSER simulations.	http://zhang.bioinformatics.ku.edu/I-TASSER	http://zhang.bioinformatics.ku.edu/I-TASSER.	NA	0	2017:2:7:12:5:38	404	Not Found
17488835	2007	Nucleic Acids Res	9.202	17	North Am	PMC1933202	10.1093/nar/gkm325	35(Web Server issue):W27-32	Berkeley Phylogenomics Group web servers: resources for structural phylogenomic analysis.	http://phylogenomics.berkeley.edu	http://phylogenomics.berkeley.edu.	NA	1	2017:2:7:12:5:39	200	OK
17488836	2007	Nucleic Acids Res	9.202	2	Asia	PMC1933230	10.1093/nar/gkm305	35(Web Server issue):W66-70	NTMG (N-terminal Truncated Mutants Generator for cDNA): an automatic multiplex PCR assays design for generating various N-terminal truncated cDNA mutants.	http://oblab.cs.nchu.edu.tw:8080/WebSDL/	http://oblab.cs.nchu.edu.tw::8080/WebSDL/.	NA	0	2017:2:7:12:5:39	500	Can't connect to oblab.cs.nchu.edu.tw:8080
17488837	2007	Nucleic Acids Res	9.202	11	North Am	PMC1933159	10.1093/nar/gkm303	35(Web Server issue):W325-9	taveRNA: a web suite for RNA algorithms and applications.	http://compbio.cs.sfu.ca/taverna	http://compbio.cs.sfu.ca/taverna.	NA	1	2017:2:7:12:6:2	200	OK
17488838	2007	Nucleic Acids Res	9.202	18	Asia	PMC1933218	10.1093/nar/gkm301	35(Web Server issue):W543-8	ProMateus--an open research approach to protein-binding sites analysis.	http://bip.weizmann.ac.il/promate	http://bip.weizmann.ac.il/promate.	NA	1	2017:2:7:12:6:4	200	OK
17488841	2007	Nucleic Acids Res	9.202	621	North Am	PMC1933214	10.1093/nar/gkm276	35(Web Server issue):W522-5	PDB2PQR: expanding and upgrading automated preparation of biomolecular structures for molecular simulations.	https://sourceforge.net/projects/pdb2pqr/	http://pdb2pqr.sourceforge.net/), which off:	https://sourceforge.net/projects/pdb2pqr/	1	2017:2:7:12:6:5	200	OK
17488847	2007	Nucleic Acids Res	9.202	6	Europe	PMC1933223	10.1093/nar/gkm228	35(Web Server issue):W416-9	3dLOGO: a web server for the identification, analysis and use of conserved protein substructures.	http://3dlogo.uniroma2.it/	http://3dlogo.uniroma2.it/	NA	0	2017:2:7:12:6:6	500	read timeout
17490482	2007	BMC Bioinformatics	2.435	18	North Am	PMC1876249	10.1186/1471-2105-8-151	0.438194	Tracembler--software for in-silico chromosome walking in unassembled genomes.	http://www.plantgdb.org/tool/tracembler/	http://www.plantgdb.org/tool/tracembler/, and the s:	NA	1	2017:2:7:12:6:26	200	OK
17504537	2007	BMC Bioinformatics	2.435	31	Europe	PMC1878508	10.1186/1471-2105-8-155	0.440972	TAP score: torsion angle propensity normalization applied to local protein structure evaluation.	http://protein.cribi.unipd.it/tap/	http://protein.cribi.unipd.it/tap/. CONCLUSIO:	NA	1	2017:2:7:12:6:27	200	OK
17510969	2007	Proteins	2.499	58	North Am	NA	10.1002/prot.21459	68(3):636-45	Fold recognition by concurrent use of solvent accessibility and residue depth.	http://sparks.informatics.iupui.edu/SP4	http://sparks.informatics.iupui.edu/SP4.	NA	0	2017:2:7:12:6:27	500	read timeout
17517132	2007	BMC Bioinformatics	2.435	2	South Am	PMC1891115	10.1186/1471-2105-8-160	0.444444	TISs-ST: a web server to evaluate polymorphic translation initiation sites and their reflections on the secretory targets.	http://ipe.cbmeg.unicamp.br/pub/TISs-ST	http://ipe.cbmeg.unicamp.br/pub/TISs-ST. CONCLUSIO:	NA	0	2017:2:7:12:6:47	503	Service Unavailable
17517762	2007	Nucleic Acids Res	9.202	4	Asia	PMC1933116	10.1093/nar/gkm350	35(Web Server issue):W633-8	INDELSCAN: a web server for comparative identification of species-specific and non-species-specific insertion/deletion events.	http://indelscan.genomics.sinica.edu.tw/IndelScan/	http://indelscan.genomics.sinica.edu.tw/IndelScan/.	NA	0	2017:2:7:12:6:49	500	read timeout
17517763	2007	Nucleic Acids Res	9.202	NA	NA	PMC1933210	10.1093/nar/gkm346	35(Web Server issue):W561-7	3D-partner: a web server to infer interacting partners and binding models.	http://gemdock.life.nctu.edu.tw/3d-partner/	http://3D-partner.life.nctu.edu.tw.	http://gemdock.life.nctu.edu.tw/3d-partner/	1	2017:2:7:12:7:10	200	OK
17517764	2007	Nucleic Acids Res	9.202	61	North Am	PMC1933164	10.1093/nar/gkm341	35(Web Server issue):W363-8	M4T: a comparative protein structure modeling server.	http://www.fiserlab.org/servers/m4t	http://www.fiserlab.org/servers/m4t) is a full:	NA	1	2017:2:7:12:7:12	200	OK
17517769	2007	Nucleic Acids Res	9.202	14	North Am	PMC1933212	10.1093/nar/gkm329	35(Web Server issue):W115-20	QuickSNP: an automated web server for selection of tagSNPs.	http://bioinformoodics.jhmi.edu/quickSNP.pl	http://bioinformoodics.jhmi.edu/quickSNP.pl.	NA	0	2017:2:7:12:7:13	403	Forbidden
17517770	2007	Nucleic Acids Res	9.202	181	Asia	PMC1933228	10.1093/nar/gkm322	35(Web Server issue):W588-94	KinasePhos 2.0: a web server for identifying protein kinase-specific phosphorylation sites based on sequences and coupling patterns.	http://KinasePhos2.mbc.nctu.edu.tw/	http://KinasePhos2.mbc.nctu.edu.tw/.	NA	1	2017:2:7:12:7:13	200	OK
17517771	2007	Nucleic Acids Res	9.202	NA	NA	PMC1933157	10.1093/nar/gkm320	35(Web Server issue):W713-7	DSHIFT: a web server for predicting DNA chemical shifts.	http://www.chem.cuhk.edu.hk/DSHIFT	http://www.chem.cuhk.edu.hk/DSHIFT.	NA	0	2017:2:7:12:7:15	302	Found
17517776	2007	Nucleic Acids Res	9.202	46	North Am	PMC1933242	10.1093/nar/gkm312	35(Web Server issue):W425-8	Protein knot server: detection of knots in protein structures.	http://knots.mit.edu	http://knots.mit.edu) is a web	NA	1	2017:2:7:12:7:22	200	OK
17517778	2007	Nucleic Acids Res	9.202	NA	NA	PMC1933123	10.1093/nar/gkm302	35(Web Server issue):W86-90	MAGMA: analysis of two-channel microarrays made easy.	www.magma-fgcz.uzh.ch	www.magma-fgcz.uzh.ch.	NA	0	2017:2:7:12:7:22	500	Can't connect to www.magma-fgcz.uzh.ch:80
17517780	2007	Nucleic Acids Res	9.202	25	North Am	PMC1933213	10.1093/nar/gkm293	35(Web Server issue):W653-8	COMPASS server for remote homology inference.	http://prodata.swmed.edu/compass	http://prodata.swmed.edu/compass.	NA	1	2017:2:7:12:7:22	200	OK
17517784	2007	Nucleic Acids Res	9.202	17	North Am	PMC1933136	10.1093/nar/gkm253	35(Web Server issue):W300-4	RADAR: a web server for RNA data analysis and research.	http://datalab.njit.edu/biodata/rna/RSmatch/server.htm	http://datalab.njit.edu/biodata/rna/RSmatch/server.htm and http:::	NA	1	2017:2:7:12:7:23	200	OK
17526512	2007	Nucleic Acids Res	9.202	22	Asia	PMC1933161	10.1093/nar/gkm369	35(Web Server issue):W159-62	ESTpass: a web-based server for processing and annotating expressed sequence tag (EST) sequences.	http://estpass.kobic.re.kr/	http://estpass.kobic.re.kr/.	NA	0	2017:2:7:12:7:24	500	read timeout
17526514	2007	Nucleic Acids Res	9.202	NA	NA	PMC1933246	10.1093/nar/gkm364	35(Web Server issue):W444-50	ProtSweep, 2Dsweep and DomainSweep: protein analysis suite at DKFZ.	http://genius.embnet.dkfz-heidelberg.de/menu/biounit/open-hUnited Statesr/	http://genius.embnet.dkfz-heidelberg.de/menu/biounit/open-hUnited Statesr/	NA	0	2017:2:7:12:7:45	404	Not Found
17526516	2007	Nucleic Acids Res	9.202	4	Europe	PMC1933235	10.1093/nar/gkm343	35(Web Server issue):W201-5	MADAP, a flexible clustering tool for the interpretation of one-dimensional genome annotation data.	http://ccg.vital-it.ch/madap/	http://www.isrec.isb-sib.ch/madap/.	http://ccg.vital-it.ch/madap/	1	2017:2:7:12:7:45	200	OK
17526519	2007	Nucleic Acids Res	9.202	105	Europe	PMC1933118	10.1093/nar/gkm333	35(Web Server issue):W645-8	The M-Coffee web server: a meta-method for computing multiple sequence alignments by combining alternative alignment methods.	http://tcoffee.crg.cat/apps/tcoffee/do:mcoffee	www.tcoffee.org.	http://tcoffee.crg.cat/apps/tcoffee/do:mcoffee	1	2017:2:7:12:7:45	200	OK
17526521	2007	Nucleic Acids Res	9.202	203	Europe	PMC1933132	10.1093/nar/gkm323	35(Web Server issue):W186-92	GeneTrail--advanced gene set enrichment analysis.	http://genetrail.bioinf.uni-sb.de	http://genetrail.bioinf.uni-sb.de.	NA	1	2017:2:7:12:7:46	200	OK
17526522	2007	Nucleic Acids Res	9.202	815	Asia	PMC1933193	10.1093/nar/gkm321	35(Web Server issue):W182-5	KAAS: an automatic genome annotation and pathway reconstruction server.	http://www.genome.jp/kegg/kaas/	http://www.genome.jp/kegg/kaas/) i.e. an	NA	1	2017:2:7:12:7:49	200	OK
17526523	2007	Nucleic Acids Res	9.202	NA	NA	PMC1933167	10.1093/nar/gkm307	35(Web Server issue):W512-21	A server and database for dipole moments of proteins.	http://bip.weizmann.ac.il/dipol	http://bip.weizmann.ac.il/dipol calculate:	NA	1	2017:2:7:12:7:50	200	OK
17526527	2007	Nucleic Acids Res	9.202	11	North Am	PMC1933207	10.1093/nar/gkm255	35(Web Server issue):W305-9	RNAbor: a web server for RNA structural neighbors.	http://bioinformatics.bc.edu/clotelab/RNAbor/index.spy	http://bioinformatics.bc.edu/clotelab/RNAbor.	http://bioinformatics.bc.edu/clotelab/RNAbor/indeNA.spy	1	2017:2:7:12:7:50	200	OK
17526528	2007	Nucleic Acids Res	9.202	8	Asia	PMC1933174	10.1093/nar/gkm254	35(Web Server issue):W538-42	CytoSVM: an advanced server for identification of cytokine-receptor interactions.	http://bioinf.xmu.edu.cn/software/cytosvm/cytosvm.php	http://bioinf.xmu.edu.cn/software/cytosvm/cytosvm.php.	NA	0	2017:2:7:12:7:50	404	Not Found
17531966	2007	Comput Biol Med	1.521	2	Europe	NA	10.1016/j.compbiomed.2007.03.008	37(11):1672-5	A web server for automatic analysis and extraction of relevant biological knowledge.	http://ibb.uab.es/revresearch	http://ibb.uab.es/revresearch.	NA	1	2017:2:7:12:7:51	200	OK
17537808	2007	Nucleic Acids Res	9.202	NA	NA	PMC1933175	10.1093/nar/gkm401	35(Web Server issue):W526-30	Patch Finder Plus (PFplus): a web server for extracting and displaying positive electrostatic patches on protein surfaces.	http://pfp.technion.ac.il	http://pfp.technion.ac.il is a web-:	NA	1	2017:2:7:12:7:51	200	OK
17537813	2007	Nucleic Acids Res	9.202	44	Europe	PMC1933208	10.1093/nar/gkm380	35(Web Server issue):W97-W104	MobilomeFINDER: web-based tools for in silico and experimental discovery of bacterial genomic islands.	http://db-mml.sjtu.edu.cn/MobilomeFINDER/	http://mml.sjtu.edu.cn/MobilomeFINDER) is an int:	http://db-mml.sjtu.edu.cn/MobilomeFINDER/	1	2017:2:7:12:7:51	200	OK
17537814	2007	Nucleic Acids Res	9.202	22	North Am	PMC1933147	10.1093/nar/gkm379	35(Web Server issue):W221-6	MYBS: a comprehensive web server for mining transcription factor binding sites in yeast.	http://bits.iis.sinica.edu.tw/~mybs/	http://cg1.iis.sinica.edu.tw/~mybs/.	http://bits.iis.sinica.edu.tw/~mybs/	1	2017:2:7:12:7:53	200	OK
17537818	2007	Nucleic Acids Res	9.202	22	Europe	PMC1933222	10.1093/nar/gkm370	35(Web Server issue):W694-700	EVALLER: a web server for in silico assessment of potential protein allergenicity.	http://bioinformatics.bmc.uu.se/evaller.html	http://bioinformatics.bmc.uu.se/evaller.html.	NA	0	2017:2:7:12:7:55	500	read timeout
17537820	2007	Nucleic Acids Res	9.202	56	North Am	PMC1933150	10.1093/nar/gkm365	35(Web Server issue):W275-9	FluGenome: a web tool for genotyping influenza A virus.	http://www.flugenome.org/	http://www.flugenome.org/), for the a:	NA	1	2017:2:7:12:8:15	200	OK
17537821	2007	Nucleic Acids Res	9.202	20	Asia	PMC1933176	10.1093/nar/gkm362	35(Web Server issue):W227-31	Melina II: a web tool for comparisons among several predictive algorithms to find potential motifs from promoter regions.	http://melina.hgc.jp	http://melina.hgc.jp.	NA	1	2017:2:7:12:8:16	200	OK
17537822	2007	Nucleic Acids Res	9.202	425	Europe	PMC1933234	10.1093/nar/gkm360	35(Web Server issue):W52-7	CRISPRFinder: a web tool to identify clustered regularly interspaced short palindromic repeats.	http://crispr.u-psud.fr/Server/CRISPRfinder.php	http://crispr.u-psud.fr/Server/CRISPRfinder.php.	NA	1	2017:2:7:12:8:17	200	OK
17537825	2007	Nucleic Acids Res	9.202	13	Europe	PMC1933181	10.1093/nar/gkm292	35(Web Server issue):W688-93	BioBayesNet: a web server for feature extraction and Bayesian network modeling of biological sequence data.	http://biwww3.informatik.uni-freiburg.de:8080/BioBayesNet/	http://biwww3.informatik.uni-freiburg.de::8080/BioBayesNet/.	NA	0	2017:2:7:12:8:18	500	Can't connect to biwww3.informatik.uni-freiburg.de:8080
17537826	2007	Nucleic Acids Res	9.202	36	North Am	PMC1933130	10.1093/nar/gkm232	35(Web Server issue):W384-92	Structure SNP (StSNP): a web server for mapping and modeling nsSNPs on protein structures with linkage to metabolic pathways.	http://ilyinlab.org/StSNP/	http://glinka.bio.neu.edu/StSNP/.	http://ilyinlab.org/StSNP/	1	2017:2:7:12:8:18	200	OK
17544465	2007	Phytochemistry	2.779	95	Europe	NA	10.1016/j.phytochem.2007.04.005	68(12):1605-11	PeroxiBase: the peroxidase database.	http://peroxibase.isb-sib.ch	http://peroxibase.isb-sib.ch). In additi:	NA	0	2017:2:7:12:8:19	500	Can't connect to peroxibase.isb-sib.ch:80
17545194	2007	Nucleic Acids Res	9.202	13	North Am	PMC1933158	10.1093/nar/gkm408	35(Web Server issue):W105-14	Cross-species microarray analysis with the OSCAR system suggests an INSR->Pax6->NQO1 neuro-protective pathway in aging and Alzheimer's disease.	http://biocomp.bioen.uiuc.edu/oscar	http://biocomp.bioen.uiuc.edu/oscar.	NA	0	2017:2:7:12:8:19	404	Not Found
17545199	2007	Nucleic Acids Res	9.202	22	North Am	PMC1933127	10.1093/nar/gkm354	35(Web Server issue):W280-4	FLAN: a web server for influenza virus genome annotation.	http://www.ncbi.nlm.nih.gov/genomes/FLU/Database/annotation.cgi	http://www.ncbi.nlm.nih.gov/genomes/FLU/Database/annotation.cgi) is a tool:	NA	1	2017:2:7:12:8:20	200	OK
17545200	2007	Nucleic Acids Res	9.202	90	Europe	PMC1933190	10.1093/nar/gkm352	35(Web Server issue):W433-7	MyHits: improvements to an interactive resource for analyzing protein sequences.	http://myhits.isb-sib.ch	http://myhits.isb-sib.ch) is an int:	NA	1	2017:2:7:12:8:21	200	OK
17551509	2007	Mol Syst Biol	10.581	22	Europe	PMC1911198	10.1038/msb4100156	0.204167	The environmental fate of organic pollutants through the global microbial metabolism.	http://www.pdg.cnb.uam.es/BDPSERVER	http://www.pdg.cnb.uam.es/BDPSERVER). The appli:	NA	1	2017:2:7:12:8:22	200	OK
17553828	2007	Nucleic Acids Res	9.202	10	Asia	PMC1933177	10.1093/nar/gkm345	35(Web Server issue):W707-12	The Multi-Q web server for multiplexed protein quantitation.	http://ms.iis.sinica.edu.tw/Multi-Q-Web	http://ms.iis.sinica.edu.tw/Multi-Q-Web.	NA	1	2017:2:7:12:8:22	200	OK
17553829	2007	Nucleic Acids Res	9.202	NA	NA	PMC1933183	10.1093/nar/gkm422	35(Web Server issue):W489-94	siteFiNDER|3D: a web-based tool for predicting the location of functional sites in proteins.	http://sage.csb.yale.edu/sitefinder3d	http://sage.csb.yale.edu/sitefinder3d' and requi:	NA	0	2017:2:7:12:8:24	500	Can't connect to sage.csb.yale.edu:80
17553833	2007	Nucleic Acids Res	9.202	NA	NA	PMC1933197	10.1093/nar/gkm390	35(Web Server issue):W354-6	DOMAC: an accurate, hybrid protein domain prediction server.	http://www.bioinfotool.org/domac.html	http://www.bioinfotool.org/domac.html.	NA	1	2017:2:7:12:8:24	200	OK
17553836	2007	Nucleic Acids Res	9.202	262	Asia	PMC1933124	10.1093/nar/gkm368	35(Web Server issue):W339-44	MiPred: classification of real and pseudo microRNA precursors using random forest prediction model with combined features.	http://www.bioinf.seu.edu.cn/miRNA/	http://www.bioinf.seu.edu.cn/miRNA/. Given a s:	NA	0	2017:2:7:12:8:25	500	read timeout
17553839	2007	Nucleic Acids Res	9.202	31	Asia	PMC1933224	10.1093/nar/gkm353	35(Web Server issue):W465-72	iPDA: integrated protein disorder analyzer.	http://biominer.bime.ntu.edu.tw/ipda	http://biominer.bime.ntu.edu.tw/ipda and mirro:	NA	1	2017:2:7:12:8:45	200	OK
17559640	2007	BMC Bioinformatics	2.435	15	Europe	PMC1925120	10.1186/1471-2105-8-189	0.464583	MATLIGN: a motif clustering, comparison and matching tool.	http://ekhidna.biocenter.helsinki.fi/poxo/matlign	http://ekhidna.biocenter.helsinki.fi/poxo/matlign.	NA	1	2017:2:7:12:8:49	200	OK
17567614	2007	Nucleic Acids Res	9.202	194	Asia	PMC1933209	10.1093/nar/gkm363	35(Web Server issue):W460-4	PrDOS: prediction of disordered protein regions from amino acid sequence.	http://prdos.hgc.jp	http://prdos.hgc.jp). The serve:	NA	1	2017:2:7:12:8:50	200	OK
17567615	2007	Nucleic Acids Res	9.202	6	Asia	PMC1933138	10.1093/nar/gkm361	35(Web Server issue):W314-9	RSRE: RNA structural robustness evaluator.	http://biotech.bmi.ac.cn/RSRE/	http://biotech.bmi.ac.cn/RSRE/.	NA	0	2017:2:7:12:8:52	404	Not Found
17567616	2007	Nucleic Acids Res	9.202	39	Asia	PMC1933152	10.1093/nar/gkm351	35(Web Server issue):W398-402	eF-seek: prediction of the functional sites of proteins by searching for similar electrostatic potential and molecular surface shape.	http://eF-site.hgc.jp/eF-seek	http://eF-site.hgc.jp/eF-seek).	NA	1	2017:2:7:12:9:3	200	OK
17567618	2007	Nucleic Acids Res	9.202	4	Europe	PMC1933240	10.1093/nar/gkm309	35(Web Server issue):W330-4	RNA Movies 2: sequential animation of RNA secondary structures.	http://bibiserv.techfak.uni-bielefeld.de/rnamovies	http://bibiserv.techfak.uni-bielefeld.de/rnamovies.	NA	1	2017:2:7:12:9:3	200	OK
17567620	2007	Nucleic Acids Res	9.202	36	North Am	PMC1933154	10.1093/nar/gkm334	35(Web Server issue):W659-68	DIAL: a web server for the pairwise alignment of two RNA three-dimensional structures using nucleotide, dihedral angle and base-pairing similarities.	http://bioinformatics.bc.edu/clotelab/DIAL	http://bioinformatics.bc.edu/clotelab/DIAL.	NA	1	2017:2:7:12:9:4	200	OK
17570145	2007	BMC Bioinformatics	2.435	28	North Am	PMC1892081	10.1186/1471-2105-8-S4-S2	8 Suppl 4:S2	SVM-Fold: a tool for discriminative multi-class protein fold and superfamily recognition.	http://svm-fold.c2b2.columbia.edu	http://svm-fold.c2b2.columbia.edu. Our syste:	NA	0	2017:2:7:12:9:5	500	Can't connect to svm-fold.c2b2.columbia.edu:80
17570146	2007	BMC Bioinformatics	2.435	8	Europe	PMC1892082	10.1186/1471-2105-8-S4-S3	8 Suppl 4:S3	CORRIE: enzyme sequence annotation with confidence estimates.	http://www.genomes.org/services/corrie/	http://www.genomes.org/services/corrie/.	NA	1	2017:2:7:12:9:5	200	OK
17576680	2007	Nucleic Acids Res	9.202	107	North Am	PMC1933122	10.1093/nar/gkm407	35(Web Server issue):W285-91	SplicePort--an interactive splice-site analysis tool.	http://www.spliceport.org/	http://www.cs.umd.edu/projects/SplicePort and http:::	http://www.spliceport.org/	1	2017:2:7:12:9:5	200	OK
17576682	2007	Nucleic Acids Res	9.202	36	Europe	PMC1933137	10.1093/nar/gkm400	35(Web Server issue):W455-9	The SLiMDisc server: short, linear motif discovery in proteins.	http://bioware.ucd.ie/~slimdisc/	http://bioware.ucd.ie/~slimdisc/.	NA	1	2017:2:7:12:9:6	200	OK
17584786	2007	Nucleic Acids Res	9.202	NA	NA	PMC1933247	10.1093/nar/gkm469	35(Web Server issue):W619-24	DEEP--a tool for differential expression effector prediction.	http://deep.bioinf.med.uni-goettingen.de	http://deep.bioinf.med.uni-goettingen.de.	NA	0	2017:2:7:12:9:7	404	Not Found
17584790	2007	Nucleic Acids Res	9.202	3	Europe	PMC1933194	10.1093/nar/gkm426	35(Web Server issue):W121-5	FGF: a web tool for Fishing Gene Family in a whole genome database.	http://fgf.genomics.org.cn/	http://fgf.genomics.org.cn/	NA	0	2017:2:7:12:9:7	500	read timeout
17584793	2007	Nucleic Acids Res	9.202	21	Europe	PMC1933219	10.1093/nar/gkm406	35(Web Server issue):W495-8	Sequence harmony: detecting functional specificity from alignments.	www.ibi.vu.nl/programs/seqharmwww	www.ibi.vu.nl/programs/seqharmwww.	NA	1	2017:2:7:12:9:27	200	OK
17584798	2007	Nucleic Acids Res	9.202	39	Europe	PMC1933226	10.1093/nar/gkm319	35(Web Server issue):W369-74	Pcons.net: protein structure prediction meta server.	http://pcons.net	http://pcons.net) provides	NA	1	2017:2:7:12:9:28	200	OK
17584799	2007	Nucleic Acids Res	9.202	66	Europe	PMC1933227	10.1093/nar/gkm297	35(Web Server issue):W573-7	firestar--prediction of functionally important residues using structural templates and alignment reliability.	http://firedb.bioinfo.cnio.es/Php/FireStar.php	http://firedb.bioinfo.cnio.es/Php/FireStar.php.	NA	1	2017:2:7:12:9:28	200	OK
17586467	2007	Biochem Biophys Res Commun	NA	290	Asia	NA	10.1016/j.bbrc.2007.06.027	360(2):339-45	MemType-2L: a web server for predicting membrane proteins and their types by incorporating evolution information through Pse-PSSM.	http://chou.med.harvard.edu/bioinf/MemType	http://chou.med.harvard.edu/bioinf/MemType.	NA	1	2017:2:7:12:9:28	200	OK
17586542	2007	Bioinformatics	5.766	67	North Am	NA	10.1093/bioinformatics/btm331	23(17):2334-6	ViroBLAST: a stand-alone BLAST web server for flexible queries of multiple databases and user's datasets.	http://indra.mullins.microbiol.washington.edu/blast/viroblast.php	http://indra.mullins.microbiol.washington.edu/blast/viroblast.php.	NA	1	2017:2:7:12:9:29	200	OK
17586821	2007	Nucleic Acids Res	9.202	NA	NA	PMC1933129	10.1093/nar/gkm459	35(Web Server issue):W3-5	Conducting research on the web: 2007 update for the bioinformatics links directory.	http://bioinformatics.ca/links_directory/narweb2007	http://bioinformatics.ca/links_directory/narweb2007. The 2007	NA	1	2017:2:7:12:9:32	200	OK
17586822	2007	Nucleic Acids Res	9.202	161	Asia	PMC1933148	10.1093/nar/gkm382	35(Web Server issue):W506-11	Selecton 2007: advanced models for detecting positive and purifying selection using a Bayesian inference approach.	http://selecton.bioinfo.tau.ac.il	http://selecton.bioinfo.tau.ac.il), a web ser:	NA	1	2017:2:7:12:9:37	200	OK
17591612	2007	Nucleic Acids Res	9.202	NA	NA	PMC1933168	10.1093/nar/gkm393	35(Web Server issue):W350-3	TFAM 1.0: an online tRNA function classifier.	http://tfam.lcb.uu.se	http://tfam.lcb.uu.se.	NA	0	2017:2:7:12:9:37	500	Can't connect to tfam.lcb.uu.se:80
17597847	2005	Bioinformation	NA	NA	NA	PMC1891623	NA	1(1):21-4	T-Epitope Designer: A HLA-peptide binding prediction server.	http://www.bioinformation.net/ted/	http://www.bioinformation.net/ted/	NA	1	2017:2:7:12:9:37	200	OK
17597879	2006	Bioinformation	NA	NA	NA	PMC1891680	NA	1(5):156-7	A web server for transcription factor binding site prediction.	http://www.nicemice.cn/bioinfo/PMS	http://www.nicemice.cn/bioinfo/PMS.	NA	0	2017:2:7:12:9:38	404	Not Found
17597883	2006	Bioinformation	NA	NA	NA	PMC1891677	NA	1(5):176-9	LIPPRED: A web server for accurate prediction of lipoprotein signal sequences and cleavage sites.	http://www.jenner.ac.uk/LipPred/	http://www.jenner.ac.uk/LipPred/. LipPred i:	NA	0	2017:2:7:12:9:39	404	Not Found
17599937	2007	Bioinformatics	5.766	43	Oceania	NA	10.1093/bioinformatics/btm334	23(23):3241-3	CASVM: web server for SVM-based prediction of caspase substrates cleavage sites.	http://www.casbase.org/casvm/index.html	http://www.casbase.org/casvm/index.html	NA	0	2017:2:7:12:9:39	404	Not Found
17610305	2007	Proteomics	4.079	29	Europe	NA	10.1002/pmic.200600784	7(15):2553-6	myProMS, a web server for management and validation of mass spectrometry-based proteomic data.	http://bioinfo.curie.fr/myproms	http://bioinfo.curie.fr/myproms.	NA	1	2017:2:7:12:9:40	200	OK
17623061	2007	BMC Genomics	3.867	19	Asia	PMC1933429	10.1186/1471-2164-8-225	0.489583	EuMicroSatdb: a database for microsatellites in the sequenced genomes of eukaryotes.	http://ipu.ac.in/usbt/EuMicroSatdb.htm	http://ipu.ac.in/usbt/EuMicroSatdb.htm is a web	NA	1	2017:2:7:12:9:40	200	OK
17626053	2007	Nucleic Acids Res	9.202	NA	NA	PMC1933165	10.1093/nar/gkm429	35(Web Server issue):W163-8	SAGExplore: a web server for unambiguous tag mapping in serial analysis of gene expression oriented to gene discovery and annotation.	http://dna.bio.puc.cl/sagexplore/home.php	http://dna.bio.puc.cl/SAGExplore.html.	http://dna.bio.puc.cl/sageNAplore/home.php	1	2017:2:7:12:9:41	200	OK
17627599	2007	Protein Pept Lett	1.076	13	Asia	NA	NA	14(6):575-80	Support vector machine based prediction of glutathione S-transferase proteins.	http://www.imtech.res.in/raghava/gstpred/	http://www.imtech.res.in/raghava/gstpred/).	NA	1	2017:2:7:12:9:42	200	OK
17630824	2007	PLoS Comput Biol	4.587	89	North Am	PMC1914369	10.1371/journal.pcbi.0030119	3(7):e119	Protein-protein interaction hotspots carved into sequences.	http://www.rostlab.org/services/isis	http://www.rostlab.org/services/isis.	NA	0	2017:2:7:12:9:43	404	Not Found
17631615	2007	Nucleic Acids Res	9.202	344	Asia	PMC1933232	10.1093/nar/gkm391	35(Web Server issue):W345-9	CPC: assess the protein-coding potential of transcripts using sequence features and support vector machine.	http://cpc.cbi.pku.edu.cn	http://cpc.cbi.pku.edu.cn. In additi:	NA	1	2017:2:7:12:9:43	200	OK
17631616	2007	Nucleic Acids Res	9.202	45	North Am	PMC1933217	10.1093/nar/gkm384	35(Web Server issue):W58-62	REPK: an analytical web server to select restriction endonucleases for terminal restriction fragment length polymorphism analysis.	http://rocaplab.ocean.washington.edu/tools/repk	http://rocaplab.ocean.washington.edu/tools/repk.	NA	1	2017:2:7:12:9:44	200	OK
17642521	2007	Acta Crystallogr D Biol Crystallogr	NA	23	Europe	NA	10.1107/S090744490703315X	63(Pt 8):935-8	ValLigURL: a server for ligand-structure comparison and validation.	http://eds.bmc.uu.se/eds/valligurl.php	http://eds.bmc.uu.se/eds/valligurl.php.	NA	1	2017:2:7:12:9:45	200	OK
17644215	2007	Comput Methods Programs Biomed	NA	19	Asia	NA	10.1016/j.cmpb.2007.06.001	87(3):230-8	RFRCDB-siRNA: improved design of siRNAs by random forest regression model coupled with database searching.	http://www.bioinf.seu.edu.cn/siRNA/index.htm	http://www.bioinf.seu.edu.cn/siRNA/index.htm), has been	NA	0	2017:2:7:12:9:45	500	read timeout
17644818	2007	Bioinformatics	5.766	53	Europe	NA	10.1093/bioinformatics/btm373	23(18):2495-7	APID2NET: unified interactome graphic analyzer.	http://bioinfow.dep.United Statesl.es/apid/apid2net.html	http://bioinfow.dep.United Statesl.es/apid/apid2net.html. SUPPLEMEN:	NA	0	2017:2:7:12:10:5	500	Can't connect to bioinfow.dep.United Statesl.es:80
17645793	2007	BMC Plant Biol	3.631	15	Europe	PMC1963329	10.1186/1471-2229-7-39	07:39:00	Arabidopsis Gene Family Profiler (aGFP)--user-oriented transcriptomic database with easy-to-use graphic interface.	http://agfp.ueb.cas.cz	http://agfp.ueb.cas.cz), which giv	NA	1	2017:2:7:12:10:6	200	OK
17645800	2007	BMC Bioinformatics	2.435	88	Asia	PMC2041956	10.1186/1471-2105-8-263	0.515972	Analysis and prediction of antibacterial peptides.	http://www.imtech.res.in/raghava/antibp/	http://www.imtech.res.in/raghava/antibp/.	NA	1	2017:2:7:12:10:6	200	OK
17645808	2007	BMC Genomics	3.867	78	Asia	PMC1940007	10.1186/1471-2164-8-246	0.504167	EasyGO: Gene Ontology-based annotation and functional enrichment analysis tool for agronomical species.	http://bioinformatics.cau.edu.cn/easygo/	http://bioinformatics.cau.edu.cn/easygo/.	NA	0	2017:2:7:12:10:6	500	read timeout
17646294	2007	Bioinformatics	5.766	38	North Am	NA	10.1093/bioinformatics/btm186	23(13):i175-84	Anisotropic fluctuations of amino acids in protein structures: insights from X-ray crystallography and elastic network models.	http://www.ccbb.pitt.edu/anm	http://www.ccbb.pitt.edu/anm is upgrad:	NA	1	2017:2:7:12:10:27	200	OK
17646322	2007	Bioinformatics	5.766	29	Europe	NA	10.1093/bioinformatics/btm179	23(13):i392-400	Locomotif: from graphical motif description to RNA motif search.	http://bibiserv.techfak.uni-bielefeld.de/locomotif	http://bibiserv.techfak.uni-bielefeld.de/locomotif.	NA	1	2017:2:7:12:10:27	200	OK
17646341	2007	Bioinformatics	5.766	10	North Am	NA	10.1093/bioinformatics/btm199	23(13):i539-48	Kinetics analysis methods for approximate folding landscapes.	http://parasol.tamu.edu/foldingserver/	http://parasol.tamu.edu/foldingserver/.	NA	1	2017:2:7:12:10:27	200	OK
17650344	2007	BMC Bioinformatics	2.435	14	Asia	PMC1940028	10.1186/1471-2105-8-266	0.518056	BPhyOG: an interactive server for genome-wide inference of bacterial phylogenies based on overlapping genes.	http://cmb.bnu.edu.cn/BPhyOG	http://cmb.bnu.edu.cn/BPhyOG.	NA	1	2017:2:7:12:10:29	200	OK
17656576	2007	Protein Sci	3.039	120	North Am	PMC2203352	10.1110/ps.072914007	16(8):1569-76	Toward rational protein crystallization: A Web server for the design of crystallizable protein variants.	http://services.mbi.ucla.edu/SER/	http://www.doe-mbi.ucla.edu/Services/SER.	http://services.mbi.ucla.edu/SER/	1	2017:2:7:12:10:31	200	OK
17683265	2007	J Comput Biol	1.537	27	North Am	NA	10.1089/cmb.2007.R007	14(5):637-54	A reduction-based exact algorithm for the contact map overlap problem.	http://eudoxus.scs.uiuc.edu/cmos/cmos.html	http://eudoxus.scs.uiuc.edu/cmos/cmos.html.	NA	0	2017:2:7:12:10:33	500	Can't connect to eudoxus.scs.uiuc.edu:80
17688439	2007	In Silico Biol	NA	8	Oceania	NA	NA	7(2):145-50	DomainDraw: a macromolecular feature drawing program.	http://domaindraw.imb.uq.edu.au	http://domaindraw.imb.uq.edu.au. The execu:	NA	1	2017:2:7:12:10:34	200	OK
17691897	2007	J Comput Biol	1.537	33	North Am	NA	10.1089/cmb.2007.R019	14(6):839-55	Simulating protein motions with rigidity analysis.	http://parasol.tamu.edu/foldingserver/	http://parasol.tamu.edu/foldingserver/).	NA	1	2017:2:7:12:10:35	200	OK
17708678	2007	PLoS Comput Biol	4.587	70	North Am	PMC1950344	10.1371/journal.pcbi.0030160	3(8):e160	Automated protein subfamily identification and classification.	http://phylogenomics.berkeley.edu/data	http://phylogenomics.berkeley.edu/phylofacts/.	http://phylogenomics.berkeley.edu/data	1	2017:2:7:12:10:36	200	OK
17708758	2007	BMC Bioinformatics	2.435	15	Europe	PMC2000914	10.1186/1471-2105-8-302	0.543056	Prediction of the burial status of transmembrane residues of helical membrane proteins.	http://service.bioinformatik.uni-saarland.de/tmx	http://service.bioinformatik.uni-saarland.de/tmx and freel:	NA	0	2017:2:7:12:10:37	404	Not Found
17709339	2007	Bioinformatics	5.766	14	Europe	NA	10.1093/bioinformatics/btm365	23(18):2504-6	A Laboratory Information Management System (LIMS) for a high throughput genetic platform aimed at candidate gene mutation screening.	http://www-gcs.iarc.fr/lims/	http://www-gcs.iarc.fr/lims/. SUPPLEMEN:	NA	1	2017:2:7:12:10:37	200	OK
17711571	2007	BMC Bioinformatics	2.435	30	Europe	PMC2040163	10.1186/1471-2105-8-304	0.544444	Evaluation of 3D-Jury on CASP7 models.	http://meta.bioinfo.pl/compare_your_model_example.pl	http://meta.bioinfo.pl/compare_your_model_example.pl available:	NA	0	2017:2:7:12:10:37	500	Can't connect to meta.bioinfo.pl:80
17720750	2007	Protein Eng Des Sel	2.364	144	Europe	NA	10.1093/protein/gzm042	20(10):521-3	The PASTA server for protein aggregation prediction.	http://protein.cribi.unipd.it/pasta/	http://protein.cribi.unipd.it/pasta/.	NA	1	2017:2:7:12:10:37	200	OK
17724062	2007	Bioinformatics	5.766	10	North Am	PMC3263380	10.1093/bioinformatics/btm398	23(20):2795-6	TMpro web server and web service: transmembrane helix prediction through amino acid property analysis.	http://blm.sis.pitt.edu:8080/axis/services/TMProFetcherService	http://blm.sis.pitt.edu::8080/axis/services/TMProFetcherService (web serv:	NA	0	2017:2:7:12:10:37	500	Can't connect to blm.sis.pitt.edu:8080
17725821	2007	BMC Bioinformatics	2.435	33	Europe	PMC2000915	10.1186/1471-2105-8-312	0.55	MaxAlign: maximizing United Statesble data in an alignment.	http://www.cbs.dtu.dk/services/MaxAlign	http://www.cbs.dtu.dk/services/MaxAlign where su:	NA	1	2017:2:7:12:10:37	200	OK
17727718	2007	BMC Bioinformatics	2.435	63	Europe	PMC1978507	10.1186/1471-2105-8-316	0.552778	Versatile annotation and publication quality visualization of protein complexes using POLYVIEW-3D.	http://polyview.cchmc.org/polyview3d.html	http://polyview.cchmc.org/polyview3d.html.	NA	1	2017:2:7:12:10:37	200	OK
17766153	2008	J Mol Graph Model	1.674	12	Europe	NA	10.1016/j.jmgm.2007.07.005	26(6):957-61	Toward the atomistic simulation of T cell epitopes automated construction of MHC: peptide structures for free energy calculations.	http://igrid-ext.cryst.bbk.ac.uk/MHCsim	http://igrid-ext.cryst.bbk.ac.uk/MHCsim) allows th:	NA	0	2017:2:7:12:10:38	503	Service Unavailable
17826148	2007	J Photochem Photobiol B	NA	96	Europe	NA	10.1016/j.jphotobiol.2007.07.006	89(1):29-35	Database on mycosporines and mycosporine-like amino acids (MAAs) in fungi, cyanobacteria, macroalgae, phytoplankton and animals.	http://www.biologie.uni-erlangen.de/botanik1/html/eng/maa_database.htm	http://www.biologie.uni-erlangen.de/botanik1/html/eng/maa_database.htm>.).	NA	0	2017:2:7:12:10:41	404	Not Found
17828612	2007	J Mol Model	1.438	31	North Am	PMC2628805	10.1007/s00894-007-0237-0	13(11):1157-67	Statistical analysis of physical-chemical properties and prediction of protein-protein interfaces.	http://curie.utmb.edu/prosurf.html	http://curie.utmb.edu/prosurf.html.	NA	1	2017:2:7:12:10:42	200	OK
17846036	2007	Bioinformatics	5.766	12805	Europe	NA	10.1093/bioinformatics/btm404	23(21):2947-8	Clustal W and Clustal X version 2.0.	http://www.ebi.ac.uk/tools/clustalw2	http://www.ebi.ac.uk/tools/clustalw2. The sourc:	NA	1	2017:2:7:12:10:43	200	OK
17847101	2008	Proteins	2.499	114	Asia	NA	10.1002/prot.21613	70(4):1219-27	HingeProt: automated prediction of hinges in protein structures.	http://www.prc.boun.edu.tr/appserv/prc/HingeProt3	http://www.prc.boun.edu.tr/appserv/prc/HingeProt3 and http:::	NA	1	2017:2:7:12:10:43	200	OK
17854501	2007	BMC Bioinformatics	2.435	76	Asia	PMC2147037	10.1186/1471-2105-8-337	0.567361	Support Vector Machine-based method for predicting subcellular localization of mycobacterial proteins using evolutionary information and motifs.	http://www.imtech.res.in/raghava/tbpred/	http://www.imtech.res.in/raghava/tbpred/ has been	NA	1	2017:2:7:12:10:44	200	OK
17854506	2007	BMC Bioinformatics	2.435	2	North Am	PMC2080642	10.1186/1471-2105-8-338	0.568056	OntologyWidget - a reUnited Statesble, embeddable widget for easily locating ontology terms.	http://smd.stanford.edu/ontologyWidget/	http://smd.stanford.edu/ontologyWidget/.	NA	0	2017:2:7:12:10:44	500	read timeout
17855416	2007	Bioinformatics	5.766	13	North Am	NA	10.1093/bioinformatics/btm439	23(21):2959-60	RagPools: RNA-As-Graph-Pools--a web server for assisting the design of structured RNA pools for in vitro selection.	http://rubin2.biomath.nyu.edu	http://rubin2.biomath.nyu.edu	NA	1	2017:2:7:12:11:4	200	OK
17879344	2008	Proteins	2.499	20	Asia	NA	10.1002/prot.21568	70(3):659-66	MAAP: malarial adhesins and adhesin-like proteins predictor.	http://maap.igib.res.in	http://maap.igib.res.in).	NA	1	2017:2:7:12:11:5	200	OK
17880924	2007	Biochem Biophys Res Commun	NA	209	North Am	NA	10.1016/j.bbrc.2007.08.140	363(2):297-303	Signal-3L: A 3-layer approach for predicting signal peptides.	http://chou.med.harvard.edu/bioinf/Signal-3L/	http://chou.med.harvard.edu/bioinf/Signal-3L/ or http::/:	NA	1	2017:2:7:12:11:6	200	OK
17893084	2007	Bioinformatics	5.766	37	Asia	NA	10.1093/bioinformatics/btm455	23(21):2945-6	Idiographica: a general-purpose web application to build idiograms on-demand for human, mouse and rat.	http://www.ncrna.org/idiographica/	http://www.ncrna.org/idiographica/	NA	0	2017:2:7:12:11:7	404	Not Found
17895276	2007	Bioinformatics	5.766	88	North Am	NA	10.1093/bioinformatics/btm434	23(24):3386-7	meta-PPISP: a meta web server for protein-protein interaction site prediction.	http://sparks.informatics.iupui.edu/PINUP/	http://sparks.informatics.iupui.edu/PINUP/). A linear	NA	0	2017:2:7:12:11:9	500	read timeout
17895278	2007	Bioinformatics	5.766	4	North Am	NA	10.1093/bioinformatics/btm406	23(21):2829-35	Minimizing the overlap problem in protein NMR: a computational framework for precision amino acid labeling.	http://nmr.proteomics.ics.uci.edu	http://nmr.proteomics.ics.uci.edu.	NA	1	2017:2:7:12:11:29	200	OK
17897087	2007	Protein Pept Lett	1.076	83	Asia	NA	10.2174/092986607781483859	14(7):626-31	PEPstr: a de novo method for tertiary structure prediction of small bioactive peptides.	http://www.imtech.res.in/raghava/pepstr/	http://www.imtech.res.in/raghava/pepstr/) was devel:	NA	1	2017:2:7:12:11:30	200	OK
17897092	2007	Protein Pept Lett	1.076	34	Asia	NA	10.2174/092986607781483912	14(7):669-71	Ramachandran plot on the web (2.0).	http://dicsoft1.physics.iisc.ernet.in/rp/	http://dicsoft1.physics.iisc.ernet.in/rp/.	NA	1	2017:2:7:12:11:30	200	OK
17900339	2007	BMC Genomics	3.867	41	Europe	PMC2234260	10.1186/1471-2164-8-341	0.570139	Collembase: a repository for springtail genomics and soil quality assessment.	http://www.collembase.org	http://www.collembase.org is a reso:	NA	1	2017:2:7:12:11:33	200	OK
17911292	2007	Int J Syst Evol Microbiol	NA	1509	Asia	NA	10.1099/ijs.0.64915-0	57(Pt 10):2259-61	EzTaxon: a web-based tool for the identification of prokaryotes based on 16S ribosomal RNA gene sequences.	http://www.eztaxon.org/	http://www.eztaxon.org/	NA	1	2017:2:7:12:11:34	200	OK
17916573	2008	Nucleic Acids Res	9.202	4	North Am	PMC2238912	10.1093/nar/gkm784	36(Database issue):D303-6	DB-PABP: a database of polyanion-binding proteins.	http://pabp.bcf.ku.edu/DB_PABP/	http://pabp.bcf.ku.edu/DB_PABP/. The DB-PA:	NA	0	2017:2:7:12:11:35	500	read timeout
17921170	2007	Bioinformatics	5.766	106	North Am	NA	10.1093/bioinformatics/btm477	23(24):3403-5	XtalPred: a web server for prediction of protein crystallizability.	http://ffas.burnham.org/XtalPred	http://ffas.burnham.org/XtalPred	NA	1	2017:2:7:12:11:56	200	OK
17921174	2007	Bioinformatics	5.766	13	Asia	NA	10.1093/bioinformatics/btm473	23(21):2823-8	OSCAR: one-class SVM for accurate recognition of cis-elements.	http://bioinfo.au.tsinghua.edu.cn/software/nu_oscar/oscar.html	http://bioinfo.au.tsinghua.edu.cn/oscar.	http://bioinfo.au.tsinghua.edu.cn/software/nu_oscar/oscar.html	1	2017:2:7:12:11:56	200	OK
17921498	2008	Nucleic Acids Res	9.202	14	Asia	PMC2238833	10.1093/nar/gkm801	36(Database issue):D409-13	coliSNP database server mapping nsSNPs on protein structures.	http://yayoi.kansai.jaea.go.jp/colisnp	http://yayoi.kansai.jaea.go.jp/colisnp) that maps:	NA	0	2017:2:7:12:11:58	500	Can't connect to yayoi.kansai.jaea.go.jp:80
17932055	2008	Nucleic Acids Res	9.202	116	North Am	PMC2238863	10.1093/nar/gkm803	36(Database issue):D1034-40	GDR (Genome Database for Rosaceae): integrated web-database for Rosaceae genomics and genetics data.	http://www.rosaceae.org	http://www.rosaceae.org.	NA	1	2017:2:7:12:11:58	200	OK
17932917	2008	Proteins	2.499	120	Asia	NA	10.1002/prot.21677	71(1):189-94	Prediction of RNA binding sites in a protein using SVM and PSSM profile.	http://www.imtech.res.in/raghava/pprint/	http://www.imtech.res.in/raghava/pprint/.	NA	1	2017:2:7:12:12:1	200	OK
17932927	2008	Proteins	2.499	15	North Am	NA	10.1002/prot.21654	71(1):61-7	Assessing secondary structure assignment of protein structures by using pairwise sequence-alignment benchmarks.	http://sparks.informatics.iupui.edu	http://sparks.informatics.iupui.edu	NA	0	2017:2:7:12:12:1	500	read timeout
17933762	2008	Nucleic Acids Res	9.202	47	North Am	PMC2238865	10.1093/nar/gkm839	36(Database issue):D667-73	LigASite--a database of biologically relevant binding sites in proteins with known apo-structures.	http://www.scmbb.ulb.ac.be/Users/benoit/LigASite	http://www.scmbb.ulb.ac.be/Users/benoit/LigASite. The websi:	NA	0	2017:2:7:12:12:22	500	read timeout
17933775	2008	Nucleic Acids Res	9.202	4	North Am	PMC2238981	10.1093/nar/gkm783	36(Database issue):D719-23	Gallus GBrowse: a unified genomic database for the chicken.	http://birdbase.net/cgi-bin/gbrowse/gallus/	http://birdbase.net/cgi-bin/gbrowse/gallus/) provides	NA	0	2017:2:7:12:12:42	404	Not Found
17933856	2007	Bioinformatics	5.766	63	North Am	PMC2636624	10.1093/bioinformatics/btm474	23(24):3397-9	InterProSurf: a web server for predicting interacting sites on protein surfaces.	http://curie.utmb.edu/prosurf.html	http://curie.utmb.edu/	http://curie.utmb.edu/prosurf.html	1	2017:2:7:12:12:44	200	OK
17936993	2007	Mol Biol (Mosk)	NA	NA	NA	NA	NA	41(4):711-8	[A method for prediction of conserved RNA secondary structures].	http://bioinf.fbb.msu.ru/RNAAlign/	http://bioinf.fbb.msu.ru/RNAAlign/).	NA	1	2017:2:7:12:12:44	200	OK
17942444	2007	Bioinformatics	5.766	54	Oceania	NA	10.1093/bioinformatics/btm505	23(23):3147-54	Predicting disulfide connectivity from protein sequence using multiple sequence feature vectors and secondary structure.	http://foo.maths.uq.edu.au/~huber/disulfide	http://foo.maths.uq.edu.au/~huber/disulfide	NA	0	2017:2:7:12:12:45	500	read timeout
17951807	2007	Methods Mol Biol	NA	8	NA	NA	10.1007/978-1-59745-528-2_2010.1385/1-59745-528-8:385	402:385-402	BiSearch: ePCR tool for native or bisulfite-treated genomic template.	http://bisearch.enzim.hu	http://bisearch.enzim.hu), a primer	NA	1	2017:2:7:12:13:5	200	OK
17951840	2007	Comput Syst Bioinformatics Conf	NA	8	North Am	NA	NA	6:381-4	CBioC: beyond a prototype for collaborative annotation of molecular interactions from the literature.	http://www.cbioc.org	http://www.cbioc.org as a brow:	NA	0	2017:2:7:12:13:5	500	Can't connect to www.cbioc.org:80
17953741	2007	BMC Bioinformatics	2.435	39	Asia	PMC2174517	10.1186/1471-2105-8-404	0.613889	Application of amino acid occurrence for discriminating different folding types of globular proteins.	http://granular.com/PROLDA/	http://granular.com/PROLDA/. CONCLUSIO:	NA	1	2017:2:7:12:13:5	200	OK
17965614	2006	Epigenetics	NA	15	Europe	NA	10.4161/epi.1.2.2765	1(2):101-5	The MethDB DAS server: adding an epigenetic information layer to the human genome.	www.methdb.net	www.methdb.net) was devel	NA	1	2017:2:7:12:13:6	200	OK
17974011	2007	BMC Bioinformatics	2.435	31	Europe	PMC2257979	10.1186/1471-2105-8-425	0.628472	SABERTOOTH: protein structural alignment based on a vectorial structure representation.	http://www.fkp.tu-darmstadt.de/sabertooth/	http://www.fkp.tu-darmstadt.de/sabertooth/.	NA	0	2017:2:7:12:13:6	404	Not Found
17976365	2008	Anal Biochem	2.243	196	Asia	NA	10.1016/j.ab.2007.10.012	373(2):386-8	PseAAC: a flexible web server for generating various kinds of protein pseudo amino acid composition.	http://chou.med.harvard.edu/bioinf/PseAA/	http://chou.med.harvard.edu/bioinf/PseAA/, by which	NA	1	2017:2:7:12:13:7	200	OK
17977889	2007	Bioinformatics	5.766	57	Asia	NA	10.1093/bioinformatics/btm493	23(23):3244-6	Pepitope: epitope mapping from affinity-selected peptides.	http://pepitope.tau.ac.il/	http://pepitope.tau.ac.il/	NA	1	2017:2:7:12:13:8	200	OK
17984227	2007	Genome Res	11.351	158	North Am	PMC2099589	10.1101/gr.6761107	17(12):1797-808	28-way vertebrate alignment and conservation track in the UCSC Genome Browser.	http://hgdownload.cse.ucsc.edu/goldenPath/hg18/multiz28way	http://hgdownload.cse.ucsc.edu/goldenPath/hg18/multiz28way, or analyz:	NA	1	2017:2:7:12:13:8	200	OK
17985196	2008	J Biomol NMR	3.439	52	North Am	NA	10.1007/s10858-007-9208-0	40(1):31-48	Application of the random coil index to studying protein flexibility.	http://wishart.biology.ualberta.ca/rci	http://wishart.biology.ualberta.ca/rci.	NA	1	2017:2:7:12:13:9	200	OK
17986320	2007	BMC Bioinformatics	2.435	52	Europe	PMC2194740	10.1186/1471-2105-8-429	0.63125	CoryneRegNet 4.0 - A reference database for corynebacterial gene regulatory networks.	http://www.CoryneRegNet.DE	http://www.CoryneRegNet.DE.	NA	1	2017:2:7:12:13:10	200	OK
17988782	2008	Biochimie	2.474	5	Europe	NA	10.1016/j.biochi.2007.09.017	90(4):563-9	DigiPINS: a database for vertebrate exonic single nucleotide polymorphisms and its application to cancer association studies.	http://pbil.univ-lyon1.fr/gem/DigiPINS/query_DigiPINS.php	http://pbil.univ-lyon1.fr/gem/DigiPINS/query_DigiPINS.php.	NA	0	2017:2:7:12:13:11	404	Not Found
17989087	2008	Nucleic Acids Res	9.202	30	North Am	PMC2238948	10.1093/nar/gkm861	36(Database issue):D871-7	The Stanford Tissue Microarray Database.	http://tma.stanford.edu	http://tma.stanford.edu) is a publ:	NA	0	2017:2:7:12:13:11	500	read timeout
17990488	2007	Pac Symp Biocomput	NA	21	North Am	NA	NA	NA	BioSpider: a web server for automating metabolome annotations.	www.biospider.ca	NA	NA	0	2017:2:7:12:13:31	500	read timeout
17991680	2008	Nucleic Acids Res	9.202	108	North Am	PMC2238839	10.1093/nar/gkm956	36(Database issue):D768-72	The Zebrafish Information Network: the zebrafish model organism database provides expanded support for genotypes and phenotypes.	http://zfin.org	http://zfin.org), the model:	NA	1	2017:2:7:12:13:51	200	OK
17993650	2007	Protein Eng Des Sel	2.364	107	North Am	NA	10.1093/protein/gzm057	20(11):561-7	Nuc-PLoc: a new web-server for predicting protein subnuclear localization by fusing PseAA composition and PsePSSM.	http://chou.med.harvard.edu/bioinf/Nuc-PLoc	http://chou.med.harvard.edu/bioinf/Nuc-PLoc.	NA	1	2017:2:7:12:13:52	200	OK
17993665	2007	Methods Mol Biol	NA	18	NA	NA	10.1385/1-59745-514-8:17	395:17-34	Comparative genomic analysis using the UCSC genome browser.	http://genome.ucsc.edu	http://genome.ucsc.edu), an easy-t:	NA	1	2017:2:7:12:13:53	200	OK
17993675	2007	Methods Mol Biol	NA	6	NA	NA	10.1385/1-59745-514-8:195	395:195-204	Alignment of genomic sequences using DIALIGN.	http://dialign.gobics.de/	http://dialign.gobics.de/.	NA	1	2017:2:7:12:13:54	200	OK
17993678	2007	Methods Mol Biol	NA	17	NA	PMC3704129	10.1385/1-59745-514-8:237	395:237-54	Mulan: multiple-sequence alignment to predict functional elements in genomic sequences.	http://mulan.dcode.org/	http://mulan.dcode.org/) has been	NA	1	2017:2:7:12:13:54	200	OK
17993679	2007	Methods Mol Biol	NA	1	NA	NA	10.1385/1-59745-514-8:255	395:255-68	Improving pairwise sequence alignment between distantly related proteins.	www.fenglab.org/bioserver.html	www.fenglab.org/bioserver.html.	NA	0	2017:2:7:12:13:55	404	Not Found
17994256	2008	J Mol Model	1.438	23	Europe	NA	10.1007/s00894-007-0250-3	14(1):69-76	AutoMotif Server for prediction of phosphorylation sites in proteins using support vector machine: 2007 update.	http://ams2.bioinfo.pl/data/	http://ams2.bioinfo.pl/data/ .	NA	0	2017:2:7:12:13:55	500	Can't connect to ams2.bioinfo.pl:80
17999112	2009	J Digit Imaging	1.406	31	Europe	PMC3043697	10.1007/s10278-007-9090-z	22(3):250-8	The application of JPEG2000 in virtual microscopy.	http://jvsmicroscope.uta.fi/	http://jvsmicroscope.uta.fi/ ). The so:	NA	1	2017:2:7:12:13:56	200	OK
17999995	2008	Nucleic Acids Res	9.202	15	Europe	PMC2238836	10.1093/nar/gkm996	36(Database issue):D651-5	DIMA 2.0--predicted and known domain interactions.	http://mips.gsf.de/genre/proj/dima	http://mips.gsf.de/genre/proj/dima.	NA	0	2017:2:7:12:13:56	404	Not Found
18003647	2008	Bioinformatics	5.766	5	Europe	NA	10.1093/bioinformatics/btm564	24(2):272-5	Fast protein fold estimation from NMR-derived distance restraints.	http://www.icgeb.org/pride	http://www.icgeb.org/pride	NA	0	2017:2:7:12:13:56	404	Not Found
18004784	2008	Proteins	2.499	32	Europe	NA	10.1002/prot.21776	71(2):920-37	Protein structure mining using a structural alphabet.	http://bioinformatics.univ-reunion.fr/PBE/	http://bioinformatics.univ-reunion.fr/PBE/.	NA	0	2017:2:7:12:13:56	500	read timeout
18006544	2008	Bioinformatics	5.766	127	Europe	NA	10.1093/bioinformatics/btm557	24(2):296-8	Text processing through Web services: calling Whatizit.	http://www.ebi.ac.uk/webservices/whatizit	http://www.ebi.ac.uk/webservices/whatizit).	NA	1	2017:2:7:12:14:16	200	OK
18024975	2008	Bioinformatics	5.766	46	Europe	NA	10.1093/bioinformatics/btm537	24(1):18-25	Multi-RELIEF: a method to recognize specificity determining residues from multiple sequence alignments using a Machine-Learning approach for feature weighting.	www.ibi.vu.nl/programs/multirelief	www.ibi.vu.nl/programs/multirelief. Matlab so	NA	1	2017:2:7:12:14:17	200	OK
18032431	2008	Nucleic Acids Res	9.202	36	Europe	PMC2238853	10.1093/nar/gkm1042	36(Database issue):D469-74	GenoList: an integrated environment for comparative analysis of microbial genomes.	NA	http://genolist.pasteur.fr/GenoList) is an int:	NA	0	2017:2:7:12:14:17	400	URL missing
18039711	2007	Nucleic Acids Res	9.202	15	North Am	PMC2190701	10.1093/nar/gkm1049	35(22):e150	STRALCP--structure alignment-based clustering of proteins.	http://as2ts.llnl.gov/AS2TS/STRALCP/	http://as2ts.llnl.gov/AS2TS/STRALCP/ for selec	NA	0	2017:2:7:12:14:17	404	Not Found
18042272	2007	BMC Bioinformatics	2.435	89	Asia	PMC2216048	10.1186/1471-2105-8-463	0.654861	Identification of DNA-binding proteins using support vector machines and evolutionary profiles.	http://www.imtech.res.in/raghava/dnabinder/	http://www.imtech.res.in/raghava/dnabinder/.	NA	1	2017:2:7:12:14:18	200	OK
18053134	2007	BMC Bioinformatics	2.435	10	North Am	PMC2238771	10.1186/1471-2105-8-469	0.659028	A structural analysis of in vitro catalytic activities of hammerhead ribozymes.	http://sfold.wadsworth.org	http://sfold.wadsworth.org.	NA	1	2017:2:7:12:14:18	200	OK
18053160	2007	BMC Bioinformatics	2.435	10	Asia	PMC2222655	10.1186/1471-2105-8-471	0.660417	Predicting and improving the protein sequence alignment quality by support vector regression.	http://pbil.kaist.ac.kr/forecast	http://pbil.kaist.ac.kr/forecast.	NA	1	2017:2:7:12:14:18	200	OK
18053250	2007	Genome Biol	11.313	58	North Am	PMC2246260	10.1186/gb-2007-8-12-r258	8(12):R258	Broad network-based predictability of Saccharomyces cerevisiae gene loss-of-function phenotypes.	http://www.yeastnet.org	http://www.yeastnet.org.	NA	0	2017:2:7:12:14:20	500	Can't connect to www.yeastnet.org:80
18056064	2008	Bioinformatics	5.766	12	Europe	NA	10.1093/bioinformatics/btm600	24(3):424-5	BAGET: a web server for the effortless retrieval of prokaryotic gene context and sequence.	http://archaea.u-psud.fr/bin/baget.dll	http://archaea.u-psud.fr/bin/baget.dll.	NA	1	2017:2:7:12:14:20	200	OK
18063570	2008	Nucleic Acids Res	9.202	131	North Am	PMC2238959	10.1093/nar/gkm1041	36(Database issue):D959-65	PlantGDB: a resource for comparative plant genomics.	http://www.plantgdb.org/	http://www.plantgdb.org/) is a geno:	NA	1	2017:2:7:12:14:20	200	OK
18073107	2007	Structure	5.237	83	North Am	NA	10.1016/j.str.2007.09.024	15(12):1567-76	Modeling backbone flexibility improves protein stability estimation.	http://eris.dokhlab.org	http://eris.dokhlab.org.	NA	1	2017:2:7:12:14:21	200	OK
18083718	2008	Bioinformatics	5.766	59	Europe	NA	10.1093/bioinformatics/btm611	24(3):358-66	Efficient peptide-MHC-I binding prediction for alleles with few known binders.	http://cbio.ensmp.fr/kiss	http://cbio.ensmp.fr/kiss. All data	NA	0	2017:2:7:12:14:22	404	Not Found
18158298	2008	Nucleic Acids Res	9.202	116	Europe	PMC2238900	10.1093/nar/gkm980	36(Database issue):D196-201	MIPS: analysis and annotation of genome information in 2007.	http://mips.gsf.de	http://mips.gsf.de).	NA	1	2017:2:7:12:14:22	200	OK
18160234	2008	Vet Microbiol	2.564	NA	Europe	NA	10.1016/j.vetmic.2007.09.010	127(3-4):369-78	Design and implementation of a database for Brucella melitensis genome annotation.	http://www.fundp.ac.be/urbm/bioinfo/aPAGe	http://www.fundp.ac.be/urbm/bioinfo/aPAGe.	NA	0	2017:2:7:12:14:24	404	Not Found
18163182	2008	Amino Acids	3.196	26	Asia	NA	10.1007/s00726-007-0616-y	35(2):345-53	AAIndexLoc: predicting subcellular localization of proteins based on a new representation of sequences using amino acid indices.	http://aaindexloc.bii.a-star.edu.sg	http://aaindexloc.bii.a-star.edu.sg .	NA	1	2017:2:7:12:14:24	200	OK
18174180	2008	Bioinformatics	5.766	59	Asia	NA	10.1093/bioinformatics/btm630	24(4):594-6	NetworkBLAST: comparative analysis of protein networks.	www.cs.tau.ac.il/~roded/networkblast.htm	www.cs.tau.ac.il/~roded/networkblast.htm.	NA	1	2017:2:7:12:14:25	200	OK
18174181	2008	Bioinformatics	5.766	78	Europe	NA	10.1093/bioinformatics/btm626	24(5):613-20	Prediction of protein functional residues from sequence by probability density estimation.	http://frpred.tuebingen.mpg.de	http://frpred.tuebingen.mpg.de. Data sets:	NA	0	2017:2:7:12:14:25	503	Service Unavailable
18175768	2008	Bioinformatics	5.766	23	North Am	NA	10.1093/bioinformatics/btm641	24(5):645-51	Structural search and retrieval using a tableau representation of protein folding patterns.	http://hollywood.bx.psu.edu/TabSearch	http://hollywood.bx.psu.edu/TabSearch.	NA	0	2017:2:7:12:14:25	500	Can't connect to hollywood.bx.psu.edu:80
18180239	2008	Bioinformatics	5.766	4	North Am	NA	10.1093/bioinformatics/btm594	24(4):577-8	FAST: Fourier transform based algorithms for significance testing of ungapped multiple alignments.	www.cs.cornell.edu/~keich/FAST	www.cs.cornell.edu/~keich/FAST.	NA	1	2017:2:7:12:14:26	200	OK
18181431	2003	Pac Health Dialog	NA	2	Oceania	NA	NA	10(2):178-81	Pacific Telepathlogy Service at Fiji School of Medicine.	http://telepath.patho.unibas.ch/	http://telepath.patho.unibas.ch/, which is	NA	1	2017:2:7:12:14:26	200	OK
18184684	2008	Bioinformatics	5.766	83	Europe	NA	10.1093/bioinformatics/btn014	24(4):586-7	The ModFOLD server for the quality assessment of protein structural models.	http://www.biocentre.rdg.ac.uk/bioinformatics/ModFOLD/	http://www.biocentre.rdg.ac.uk/bioinformatics/ModFOLD/.	NA	1	2017:2:7:12:14:26	200	OK
18184685	2008	Bioinformatics	5.766	10	North Am	NA	10.1093/bioinformatics/btn005	24(5):606-12	Reconstructing ancestral genome content based on symmetrical best alignments and Dollo parsimony.	http://kosik-web.mcdb.ucsb.edu/evolmap/index.htm	http://kosik-web.mcdb.ucsb.edu/evolmap/index.htm .	NA	0	2017:2:7:12:14:27	500	Can't connect to kosik-web.mcdb.ucsb.edu:80
18199576	2008	Brief Bioinform	8.399	5	Europe	NA	10.1093/bib/bbm063	9(3):243-9	Two interactive Bioinformatics courses at the Bielefeld University Bioinformatics Server.	http://bibiserv.techfak.uni-bielefeld.de/cgi-bin/dpcourse?chap=00&sec=00&ssec=00&p=01	http://bibiserv.techfak.uni-bielefeld.de/dpcourse/).	http://bibiserv.techfak.uni-bielefeld.de/cgi-bin/dpcourse?chap=00&sec=00&ssec=00&p=01	1	2017:2:7:12:14:27	200	OK
18205906	2008	BMC Bioinformatics	2.435	3	Europe	PMC2267704	10.1186/1471-2105-9-27	09:27:00	T2prhd: a tool to study the patterns of repeat evolution.	http://t2prhd.sourceforge.net	http://t2prhd.sourceforge.net and is al:	NA	1	2017:2:7:12:14:27	200	OK
18214956	2008	Proteins	2.499	36	North Am	NA	10.1002/prot.21940	72(1):427-33	Real-value prediction of backbone torsion angles.	http://sparks.informatics.iupui.edu	http://sparks.informatics.iupui.edu.	NA	0	2017:2:7:12:14:28	500	read timeout
18215258	2008	BMC Bioinformatics	2.435	56	Asia	PMC2375124	10.1186/1471-2105-9-33	09:33:00	A fast structural multiple alignment method for long RNA sequences.	http://mxscarna.ncrna.org	http://mxscarna.ncrna.org.	NA	0	2017:2:7:12:14:48	500	Can't connect to mxscarna.ncrna.org:80
18215311	2008	BMC Bioinformatics	2.435	43	North Am	PMC2258288	10.1186/1471-2105-9-39	09:39:00	miRNAminer: a tool for homologous microRNA gene search.	http://pag.csail.mit.edu/mirnaminer	http://pag.csail.mit.edu/mirnaminer.	NA	1	2017:2:7:12:14:48	200	OK
18215316	2008	BMC Bioinformatics	2.435	1681	North Am	PMC2245901	10.1186/1471-2105-9-40	09:40:00	I-TASSER server for protein 3D structure prediction.	http://zhanglab.ccmb.med.umich.edu/I-TASSER/	http://zhang.bioinformatics.ku.edu/I-TASSER.	http://zhanglab.ccmb.med.umich.edu/I-TASSER/	1	2017:2:7:12:14:49	200	OK
18215330	2008	BMC Bioinformatics	2.435	23	Asia	PMC2246157	10.1186/1471-2105-9-41	09:41:00	Predicting the interactome of Xanthomonas oryzae pathovar oryzae for target selection and DB service.	http://bioportal.kobic.kr/XooNET/	http://bioportal.kobic.kr/XooNET/.	NA	0	2017:2:7:12:14:50	404	Not Found
18221010	2008	Protein Pept Lett	1.076	18	Europe	NA	10.2174/092986608783330314	15(1):33-8	COILCHECK: an interactive server for the analysis of interface regions in coiled coils.	http://caps.ncbs.res.in/coilcheck/	http://caps.ncbs.res.in/coilcheck/.	NA	1	2017:2:7:12:14:51	200	OK
18221524	2008	BMC Bioinformatics	2.435	45	North Am	PMC2246155	10.1186/1471-2105-9-53	09:53:00	TOBFAC: the database of tobacco transcription factors.	http://compsysbio.achs.virginia.edu/tobfac/	http://compsysbio.achs.virginia.edu/tobfac/.	NA	0	2017:2:7:12:14:52	503	Service Unavailable
18226234	2008	BMC Bioinformatics	2.435	52	Asia	PMC2254373	10.1186/1471-2105-9-62	0.418056	VirulentPred: a SVM based prediction method for virulent proteins in bacterial pathogens.	http://bioinfo.icgeb.res.in/virulent/	http://bioinfo.icgeb.res.in/virulent/.	NA	1	2017:2:7:12:14:52	200	OK
18230160	2008	BMC Bioinformatics	2.435	59	Europe	PMC2246156	10.1186/1471-2105-9-65	0.420139	E-CAI: a novel server to estimate an expected value of Codon Adaptation Index (eCAI).	http://genomes.urv.es/CAIcal/E-CAI	http://genomes.urv.es/CAIcal/E-CAI, is a web:	NA	0	2017:2:7:12:14:56	404	Not Found
18232104	2008	Pac Symp Biocomput	NA	25	North Am	NA	NA	NA	Analysis of microRNA-target interactions by a target structure based hybridization model.	http://sfold.wadsworth.org	http://sfold.wadsworth.org.	NA	1	2017:2:7:12:14:56	200	OK
18235992	2008	Amino Acids	3.196	42	Asia	NA	10.1007/s00726-007-0634-9	35(2):295-302	PRINTR: prediction of RNA binding sites in proteins using SVM and profiles.	http://210.42.106.80/printr/	http://210.42.106.80/printr/ .	NA	0	2017:2:7:12:14:56	503	Service Unavailable
18238785	2008	Bioinformatics	5.766	85	Europe	NA	10.1093/bioinformatics/btn043	24(6):863-5	Prophinder: a computational tool for prophage prediction in prokaryotic genomes.	http://aclame.ulb.ac.be/prophinder	http://aclame.ulb.ac.be/prophinder	NA	1	2017:2:7:12:15:12	200	OK
18245125	2008	Bioinformatics	5.766	69	Europe	NA	10.1093/bioinformatics/btn039	24(6):807-14	De novo identification of highly diverged protein repeats by probabilistic consistency.	http://toolkit.tuebingen.mpg.de/hhrepid	NA	NA	1	2017:2:7:12:15:12	200	OK
18247410	2008	Proteins	2.499	171	North Am	PMC2666101	10.1002/prot.21945	72(2):547-56	MUSTER: Improving protein sequence profile-profile alignments by using multiple sources of structure information.	http://zhanglab.ccmb.med.umich.edu/MUSTER/	http://zhang.bioinformatics.ku.edu/MUSTER.	http://zhanglab.ccmb.med.umich.edu/MUSTER/	1	2017:2:7:12:15:12	200	OK
18249180	2008	Anal Biochem	2.243	105	Asia	NA	10.1016/j.ab.2008.01.012	375(2):388-90	HIVcleave: a web-server for predicting human immunodeficiency virus protease cleavage sites in proteins.	http://chou.med.harvard.edu/bioinf/HIV/	http://chou.med.harvard.edu/bioinf/HIV/. In this n:	NA	1	2017:2:7:12:15:13	200	OK
18260102	2008	Proteins	2.499	25	Asia	NA	10.1002/prot.21944	72(2):693-710	PSLDoc: Protein subcellular localization prediction based on gapped-dipeptides and probabilistic latent semantic analysis.	http://bio-cluster.iis.sinica.edu.tw/~	http://bio-cluster.iis.sinica.edu.tw/~ bioapp/PS	NA	0	2017:2:7:12:15:14	404	Not Found
18261823	2008	Comput Methods Programs Biomed	NA	33	Asia	NA	10.1016/j.cmpb.2007.12.003	90(2):148-53	RISP: a web-based server for prediction of RNA-binding sites in proteins.	http://grc.seu.edu.cn/RISP	http://grc.seu.edu.cn/RISP. Given a p:	NA	0	2017:2:7:12:15:15	500	Can't connect to grc.seu.edu.cn:80
18267306	2007	Genomics Proteomics Bioinformatics	2.168	4	Asia	NA	10.1016/S1672-0229(08)60012-1	5(3-4):250-2	Oxypred: prediction and classification of oxygen-binding proteins.	http://www.imtech.res.in/raghava/oxypred/	http://www.imtech.res.in/raghava/oxypred/).	NA	1	2017:2:7:12:15:15	200	OK
18274516	2008	Nat Protoc	9.646	602	North Am	NA	10.1038/nprot.2007.494	3(2):153-62	Cell-PLoc: a package of Web servers for predicting subcellular localization of proteins in various organisms.	http://chou.med.harvard.edu/bioinf/Cell-PLoc	http://chou.med.harvard.edu/bioinf/Cell-PLoc.	NA	1	2017:2:7:12:15:16	200	OK
18276143	2008	Trends Biochem Sci	12.81	108	Europe	NA	10.1016/j.tibs.2008.01.001	33(3):101-3	iPath: interactive exploration of biochemical pathways and networks.	http://pathways.embl.de	http://pathways.embl.de) for visua:	NA	1	2017:2:7:12:15:17	200	OK
18282303	2008	BMC Bioinformatics	2.435	158	Asia	PMC2265675	10.1186/1471-2105-9-104	0.447222	PDTD: a web-accessible protein database for drug target identification.	http://www.dddc.ac.cn/pdtd/index.php	http://www.dddc.ac.cn/tarfisdock, which has:	http://www.dddc.ac.cn/pdtd/indeNA.php	1	2017:2:7:12:15:17	200	OK
18286180	2008	PLoS One	3.057	31	Europe	PMC2229843	10.1371/journal.pone.0001623	3(2):e1623	Asap: a framework for over-representation statistics for transcription factor binding sites.	http://servers.binf.ku.dk/asap/	http://servers.binf.ku.dk/asap/.	NA	1	2017:2:7:12:15:18	200	OK
18287174	2008	Protein Eng Des Sel	2.364	4	Asia	NA	10.1093/protein/gzn006	21(4):279-82	CytoPred: a server for prediction and classification of cytokines.	http://www.imtech.res.in/raghava/cytopred	http://www.imtech.res.in/raghava/cytopred.	NA	1	2017:2:7:12:15:18	200	OK
18287698	2007	Methods Mol Biol	NA	1	NA	NA	NA	406:275-99	BGI-RIS V2.	http://rice.genomics.org.cn	http://rice.genomics.org.cn) and the F:	NA	0	2017:2:7:12:15:19	404	Not Found
18288329	2007	Bioinformation	NA	NA	NA	PMC2248443	NA	2(3):86-90	IWS: integrated web server for protein sequence and structure analysis.	http://caps.ncbs.res.in/iws	http://caps.ncbs.res.in/iws.	NA	1	2017:2:7:12:15:21	200	OK
18293306	2008	J Comput Chem	3.648	108	Asia	NA	10.1002/jcc.20918	29(10):1596-604	Prediction of protein structural class using novel evolutionary collocation-based sequence representation.	http://biomine.ece.ualberta.ca/Structural_Class/SCEC.html	http://biomine.ece.ualberta.ca/Structural_Class/SCEC.html.	NA	1	2017:2:7:12:15:22	200	OK
18294369	2008	BMC Bioinformatics	2.435	4	Asia	PMC2267439	10.1186/1471-2105-9-112	0.452778	ReAlignerV: web-based genomic alignment tool with high specificity and robustness estimated by species-specific insertion sequences.	http://genet.med.kagawa-u.ac.jp/	http://genet.med.kagawa-u.ac.jp/.	NA	0	2017:2:7:12:15:23	500	read timeout
18296484	2008	Nucleic Acids Res	9.202	36	Europe	PMC2275153	10.1093/nar/gkn083	36(5):e34	Bisulfite sequencing Data Presentation and Compilation (BDPC) web server--a useful tool for DNA methylation analysis.	http://services.ibc.uni-stuttgart.de/BDPC/	http://biochem.jacobs-university.de/BDPC/) automatic	http://services.ibc.uni-stuttgart.de/BDPC/	1	2017:2:7:12:15:44	200	OK
18308593	2008	Fungal Genet Biol	2.933	57	Europe	NA	10.1016/j.fgb.2008.01.004	45(5):638-45	FOLy: an integrated database for the classification and functional annotation of fungal oxidoreductases potentially involved in the degradation of lignin and related aromatic compounds.	http://foly.esil.univ-mrs.fr	http://foly.esil.univ-mrs.fr.	NA	0	2017:2:7:12:15:44	500	read timeout
18311630	2008	SAR QSAR Environ Res	1.897	26	North Am	NA	10.1080/10629360701843540	19(1-2):1-9	Internet resources integrating many small-molecule databases.	http://cactus.nci.nih.gov	http://cactus.nci.nih.gov) of the Co:	NA	1	2017:2:7:12:16:4	200	OK
18321884	2008	Bioinformatics	5.766	8	Europe	NA	10.1093/bioinformatics/btn086	24(8):1115-7	e-LiSe--an online tool for finding needles in the '(Medline) haystack'.	http://miron.ibb.waw.pl/elise/	http://miron.ibb.waw.pl/elise/	NA	1	2017:2:7:12:16:5	200	OK
18326508	2008	Bioinformatics	5.766	28	Europe	NA	10.1093/bioinformatics/btn093	24(9):1137-44	3D-Garden: a system for modelling protein-protein complexes based on conformational refinement of ensembles generated with the marching cubes algorithm.	http://www.sbg.bio.ic.ac.uk/3dgarden	http://www.sbg.bio.ic.ac.uk/3dgarden (server).:	NA	1	2017:2:7:12:16:5	200	OK
18336359	2008	Protein Pept Lett	1.076	51	Asia	NA	10.2174/092986608783744234	15(3):286-9	Predicting subcellular localization with AdaBoost Learner.	http://chemdata.shu	http://chemdata.shu. edu.cn/sl:	NA	0	2017:2:7:12:16:5	500	Can't connect to chemdata.shu:80
18337259	2008	Bioinformatics	5.766	3	North Am	NA	10.1093/bioinformatics/btn097	24(9):1145-53	Optimizing the size of the sequence profiles to increase the accuracy of protein sequence alignments generated by profile-profile algorithms.	http://blackhawk.cs.uni.edu	http://blackhawk.cs.uni.edu	NA	0	2017:2:7:12:16:5	500	read timeout
18342624	2008	Biochem Biophys Res Commun	NA	12	Asia	NA	10.1016/j.bbrc.2008.03.008	369(4):1166-8	Prediction of translation initiation sites in human mRNA sequences with AUG start codon in weak Kozak context: A neural network approach.	http://bioinfo.iitk.ac.in/AUGPred/	http://bioinfo.iitk.ac.in/AUGPred/.	NA	1	2017:2:7:12:16:26	200	OK
18351617	2008	J Comput Chem	3.648	32	Asia	NA	10.1002/jcc.20925	29(10):1675-83	Analysis and prediction of protein folding rates using quadratic response surface models.	http://bioinformatics.myweb.hinet.net/foldrate.htm	http://bioinformatics.myweb.hinet.net/foldrate.htm.	NA	1	2017:2:7:12:16:27	200	OK
18366663	2008	BMC Bioinformatics	2.435	15	Europe	PMC2323388	10.1186/1471-2105-9-151	0.479861	H2r: identification of evolutionary important residues by means of an entropy based analysis of multiple sequence alignments.	http://www-bioinf.uni-regensburg.de	http://www-bioinf.uni-regensburg.de. CONCLUSIO:	NA	0	2017:2:7:12:16:28	500	read timeout
18366802	2008	BMC Bioinformatics	2.435	18	North Am	PMC2358893	10.1186/1471-2105-9-170	0.493056	PSAT: a web tool to compare genomic neighborhoods of multiple prokaryotic genomes.	http://www.nwrce.org/psat	http://www.nwrce.org/psat.	NA	1	2017:2:7:12:16:48	200	OK
18373265	2008	Methods Mol Biol	NA	3	Europe	NA	10.1007/978-1-60327-084-7_20	446:281-92	Analysis of O-glycosylation.	http://www.cbs.dtu.dk/netOglyc/cbsnetOglyc.html	http://www.cbs.dtu.dk/netOglyc/cbsnetOglyc.html , produce:	NA	0	2017:2:7:12:16:49	404	Not Found
18373871	2008	BMC Syst Biol	2.213	29	North Am	PMC2375859	10.1186/1752-0509-2-30	02:30:00	Optimal enumeration of state space of finitely buffered stochastic molecular networks and exact computation of steady state landscape probability.	http://scsb.sjtu.edu.cn/statespace	http://scsb.sjtu.edu.cn/statespace. CONCLUSIO:	NA	1	2017:2:7:12:16:49	200	OK
18388143	2008	Bioinformatics	5.766	7	Europe	NA	10.1093/bioinformatics/btn114	24(10):1271-7	Prediction of the translocon-mediated membrane insertion free energies of protein sequences.	http://service.bioinformatik.uni-saarland.de/mins	http://service.bioinformatik.uni-saarland.de/mins	NA	0	2017:2:7:12:16:50	404	Not Found
18391233	2007	In Silico Biol	NA	23	Asia	NA	NA	7(4-5):405-12	BTXpred: prediction of bacterial toxins.	http://www.imtech.res.in/raghava/btxpred/supplementary.html	http://www.imtech.res.in/raghava/btxpred/supplementary.html.	NA	1	2017:2:7:12:16:50	200	OK
18393395	2008	Proteins	2.499	66	North Am	PMC2693897	10.1002/prot.22052	73(1):72-86	MolAxis: efficient and accurate identification of channels in macromolecules.	http://bioinfo3d.cs.tau.ac.il/MolAxis/	http://bioinfo3d.cs.tau.ac.il/MolAxis/).	NA	1	2017:2:7:12:16:52	200	OK
18397893	2008	Bioinformatics	5.766	14	Europe	NA	10.1093/bioinformatics/btn121	24(10):1316-7	siRNA specificity searching incorporating mismatch tolerance data.	http://informatics-eskitis.griffith.edu.au/SpecificityServer	http://informatics-eskitis.griffith.edu.au/SpecificityServer.	NA	0	2017:2:7:12:16:52	500	Can't connect to informatics-eskitis.griffith.edu.au:80
18397894	2008	Bioinformatics	5.766	54	Europe	PMC2373917	10.1093/bioinformatics/btn118	24(10):1251-6	Domain annotation of trimeric autotransporter adhesins--daTAA.	http://toolkit.tuebingen.mpg.de/dataa	http://toolkit.tuebingen.mpg.de/dataa	NA	1	2017:2:7:12:16:53	200	OK
18402434	2008	J Chem Inf Model	3.657	NA	NA	NA	10.1021/ci700334f	48(4):691-703	Distributed chemical computing using ChemStar: an open source java remote method invocation architecture applied to large scale molecular data from PubChem.	http://moltable.ncl.res.in/chemstar/	http://moltable.ncl.res.in/chemstar/.	NA	0	2017:2:7:12:16:53	404	Not Found
18402930	2008	Comput Biol Med	1.521	NA	North Am	PMC2431148	10.1016/j.compbiomed.2008.02.009	38(5):620-2	PubMedAlertMe--standalone Windows-based PubMed SDI software application.	http://amp.pharm.mssm.edu/PubMedAlertMe/PubMedAlertMe_setup.zip	http://amp.pharm.mssm.edu/PubMedAlertMe/PubMedAlertMe_setup.zip.	NA	0	2017:2:7:12:16:54	503	Service Unavailable
18411202	2008	Nucleic Acids Res	9.202	134	North Am	PMC2447734	10.1093/nar/gkn179	36(Web Server issue):W181-4	The CGView Server: a comparative genomics tool for circular genomes.	http://stothard.afns.ualberta.ca/cgview_server/	http://stothard.afns.ualberta.ca/cgview_server/	NA	1	2017:2:7:12:16:55	200	OK
18411203	2008	Nucleic Acids Res	9.202	10	Asia	PMC2447808	10.1093/nar/gkn172	36(Web Server issue):W60-4	DAhunter: a web-based server that identifies homologous proteins by comparing domain architecture.	http://localodom.kobic.re.kr/dahunter/index.htm	http://localodom.kobic.re.kr/dahunter/index.htm.	NA	0	2017:2:7:12:16:56	500	read timeout
18420653	2008	Nucleic Acids Res	9.202	46	Europe	PMC2447742	10.1093/nar/gkn181	36(Web Server issue):W276-80	webPIPSA: a web server for the comparison of protein interaction properties.	http://projects.eml.org/mcm/software/pipsa	http://projects.eml.org/mcm/software/pipsa), webPIPSA	NA	1	2017:2:7:12:17:17	200	OK
18424795	2008	Nucleic Acids Res	9.202	626	Europe	PMC2447809	10.1093/nar/gkn188	36(Web Server issue):W70-4	The Vienna RNA websuite.	http://rna.tbi.univie.ac.at/	http://rna.tbi.univie.ac.at/.	NA	1	2017:2:7:12:17:17	200	OK
18424796	2008	Nucleic Acids Res	9.202	153	Asia	PMC2447790	10.1093/nar/gkn186	36(Web Server issue):W229-32	FireDock: a web server for fast interaction refinement in molecular docking.	http://bioinfo.protres.ru/foldnucleus/	http://bioinfo3d.cs.tau.ac.il/FireDock/.	http://bioinfo.protres.ru/foldnucleus/	1	2017:2:7:12:17:17	200	OK
18424800	2008	Nucleic Acids Res	9.202	62	Asia	PMC2447755	10.1093/nar/gkn187	36(Web Server issue):W223-8	PharmaGist: a webserver for ligand-based pharmacophore detection.	http://bioinfo3d.cs.tau.ac.il/PharmaGist	http://bioinfo3d.cs.tau.ac.il/PharmaGist.	NA	1	2017:2:7:12:17:17	200	OK
18425404	2008	Amino Acids	3.196	8	Asia	NA	10.1007/s00726-008-0085-y	35(3):599-605	DPROT: prediction of disordered proteins using evolutionary information.	http://www.imtech.res.in/raghava/dprot/	http://www.imtech.res.in/raghava/dprot/.	NA	1	2017:2:7:12:17:17	200	OK
18428743	2005	Curr Protoc Bioinformatics	NA	2	North Am	NA	10.1002/0471250953.bi1004s9	Chapter 10:Unit10	MultiPipMaker: comparative alignment server for multiple DNA sequences.	http://pipmaker.bx.psu.edu/pipmaker/	http://www.bx.psu.edu) provides	http://pipmaker.bNA.psu.edu/pipmaker/	1	2017:2:7:12:17:18	200	OK
18428779	2007	Curr Protoc Bioinformatics	NA	9	Europe	NA	10.1002/0471250953.bi0115s16	Chapter 1:Unit 1	Using the Ensembl genome server to browse genomic sequence data.	http://www.ensembl.org	http://www.ensembl.org) provides	NA	1	2017:2:7:12:17:18	200	OK
18433031	2008	Int J Eat Disord	NA	17	Europe	NA	10.1002/eat.20542	41(6):527-34	Online discussion groups for bulimia nervosa: an inductive approach to Internet-based communication between patients.	www.ab-server.de	www.ab-server.de) during th	NA	1	2017:2:7:12:17:18	200	OK
18434251	2008	Comput Biol Chem	1.014	42	Asia	NA	10.1016/j.compbiolchem.2008.03.002	32(3):227-31	TMBETADISC-RBF: Discrimination of beta-barrel membrane proteins using RBF networks and PSSM profiles.	http://rbf.bioinfo.tw/~sachen/OMP.html	http://rbf.bioinfo.tw/~sachen/OMP.html.	NA	1	2017:2:7:12:17:19	200	OK
18434342	2008	Bioinformatics	5.766	18	Europe	PMC2427164	10.1093/bioinformatics/btn202	24(12):1469-70	TOPDOM: database of domains and motifs with conservative location in transmembrane proteins.	http://topdom.enzim.hu	http://topdom.enzim.hu CONTACT::	NA	1	2017:2:7:12:17:21	200	OK
18440970	2008	Nucleic Acids Res	9.202	4	Asia	PMC2447773	10.1093/nar/gkn222	36(Web Server issue):W75-8	Software.ncrna.org: web servers for analyses of RNA sequences.	http://software.ncrna.org	http://software.ncrna.org, along wit:	NA	0	2017:2:7:12:17:21	500	Can't connect to software.ncrna.org:80
18440971	2008	Nucleic Acids Res	9.202	3	Europe	PMC2447727	10.1093/nar/gkn221	36(Web Server issue):W154-6	OligoHeatMap (OHM): an online tool to estimate and display hybridizations of oligonucleotides onto DNA sequences.	http://bioinfo.unice.fr/ohm/	http://bioinfo.unice.fr/ohm/, with link	NA	0	2017:2:7:12:17:22	503	Service Unavailable
18440977	2008	Nucleic Acids Res	9.202	12	Europe	PMC2447780	10.1093/nar/gkn196	36(Web Server issue):W485-90	ISPIDER Central: an integrated database web-server for proteomics.	http://www.ispider.manchester.ac.uk/cgi-bin/ProteomicSearch.pl	http://www.ispider.manchester.ac.uk/cgi-bin/ProteomicSearch.pl), an integr:	NA	0	2017:2:7:12:17:22	404	Not Found
18440979	2008	Nucleic Acids Res	9.202	15	Europe	PMC2447732	10.1093/nar/gkn229	36(Web Server issue):W519-22	EpiToolKit--a web server for computational immunomics.	www.epitoolkit.org	www.epitoolkit.org.	NA	1	2017:2:7:12:17:22	200	OK
18442989	2008	Nucleic Acids Res	9.202	45	Europe	PMC2447733	10.1093/nar/gkn226	36(Web Server issue):W281-5	GLUE-IT and PEDEL-AA: new programmes for analyzing protein diversity in randomized libraries.	http://guinevere.otago.ac.nz/stats.html	http://guinevere.otago.ac.nz/stats.html.	NA	1	2017:2:7:12:17:23	200	OK
18442990	2008	Nucleic Acids Res	9.202	19	Asia	PMC2447736	10.1093/nar/gkn218	36(Web Server issue):W185-9	HOMCOS: a server to predict interacting protein pairs and interacting sites by homology modeling of complex structures.	http://biunit.naist.jp/homcos	http://biunit.naist.jp/homcos) to predic:	NA	0	2017:2:7:12:17:25	500	Can't connect to biunit.naist.jp:80
18442991	2008	Nucleic Acids Res	9.202	207	North Am	PMC2447798	10.1093/nar/gkn216	36(Web Server issue):W233-8	The RosettaDock server for local protein-protein docking.	http://rosettadock.graylab.jhu.edu	http://rosettadock.graylab.jhu.edu) identifie:	NA	1	2017:2:7:12:17:25	200	OK
18442993	2008	Nucleic Acids Res	9.202	109	Europe	PMC2447776	10.1093/nar/gkn194	36(Web Server issue):W481-4	MassTRIX: mass translator into pathways.	http://masstrix.org	http://masstrix.org.	NA	1	2017:2:7:12:17:26	200	OK
18442995	2008	Nucleic Acids Res	9.202	49	Europe	PMC2447719	10.1093/nar/gkn211	36(Web Server issue):W35-41	PVS: a web server for protein sequence variability analysis tuned to facilitate conserved epitope discovery.	http://imed.med.ucm.es/PVS/	http://imed.med.ucm.es/PVS/.	NA	1	2017:2:7:12:17:27	200	OK
18448468	2008	Nucleic Acids Res	9.202	37	Asia	PMC2447770	10.1093/nar/gkn223	36(Web Server issue):W210-5	MolAxis: a server for identification of channels in macromolecules.	http://bioinfo3d.cs.tau.ac.il/MolAxis	http://bioinfo3d.cs.tau.ac.il/MolAxis.	NA	1	2017:2:7:12:17:27	200	OK
18448469	2008	Nucleic Acids Res	9.202	8	North Am	PMC2447726	10.1093/nar/gkn220	36(Web Server issue):W85-90	NOBAI: a web server for character coding of geometrical and statistical features in RNA structure.	http://www.manet.uiuc.edu/nobai/nobai.php	http://www.manet.uiuc.edu/nobai/nobai.php'. This web	NA	1	2017:2:7:12:17:27	200	OK
18450016	2007	Methods Mol Biol	NA	4	Asia	NA	10.1007/978-1-60327-118-9_28	409:381-6	TAPPred prediction of TAP-binding peptides in antigens.	http://www.imtech.res.in/raghava/tappred	http://www.imtech.res.in/raghava/tappred.	NA	1	2017:2:7:12:17:28	200	OK
18453555	2008	Bioinformatics	5.766	31	Europe	NA	10.1093/bioinformatics/btn137	24(11):1394-6	Mireval: a web tool for simple microRNA prediction in genome sequences.	http://tagc.univ-mrs.fr/mireval	http://tagc.univ-mrs.fr/mireval	NA	1	2017:2:7:12:17:29	200	OK
18453628	2008	Nucleic Acids Res	9.202	34	Europe	PMC2447729	10.1093/nar/gkn195	36(Web Server issue):W128-32	ConTra: a promoter alignment analysis tool for identification of transcription factor binding sites across species.	http://bioit.dmbr.ugent.be/ConTra/index.php	http://bioit.dmbr.ugent.be/ConTra/index.php.	NA	1	2017:2:7:12:17:29	200	OK
18460544	2008	Nucleic Acids Res	9.202	47	Europe	PMC2447774	10.1093/nar/gkn230	36(Web Server issue):W452-9	GraphWeb: mining heterogeneous biological networks for gene modules with functional significance.	http://biit.cs.ut.ee/graphweb/	http://biit.cs.ut.ee/graphweb/.	NA	1	2017:2:7:12:17:29	200	OK
18460546	2008	Nucleic Acids Res	9.202	66	Europe	PMC2447786	10.1093/nar/gkn197	36(Web Server issue):W42-6	RAPIDO: a web server for the alignment of protein structures in the presence of conformational changes.	http://webapps.embl-hamburg.de/rapido	http://webapps.embl-hamburg.de/rapido.	NA	1	2017:2:7:12:17:31	200	OK
18463135	2008	Nucleic Acids Res	9.202	5	Europe	PMC2447738	10.1093/nar/gkn253	36(Web Server issue):W140-4	OREST: the online resource for EST analysis.	http://mips.gsf.de/genre/proj/orest/index.html	http://mips.gsf.de/genre/proj/orest/index.html) is a serv:	NA	0	2017:2:7:12:17:31	404	Not Found
18463136	2008	Nucleic Acids Res	9.202	1030	Europe	PMC2447793	10.1093/nar/gkn238	36(Web Server issue):W197-201	The Jpred 3 secondary structure prediction server.	http://www.compbio.dundee.ac.uk/jpred	http://www.compbio.dundee.ac.uk/jpred) is a seco:	NA	1	2017:2:7:12:17:31	200	OK
18463137	2008	Nucleic Acids Res	9.202	6	Europe	PMC2447787	10.1093/nar/gkn237	36(Web Server issue):W255-9	SEQATOMS: a web tool for identifying missing regions in PDB in sequence context.	http://www.bioinformatics.nl/tools/seqatoms/	http://www.bioinformatics.nl/tools/seqatoms/.	NA	1	2017:2:7:12:17:31	200	OK
18463140	2008	Nucleic Acids Res	9.202	235	Europe	PMC2447772	10.1093/nar/gkn202	36(Web Server issue):W509-12	NetMHC-3.0: accurate web accessible predictions of human, mouse and monkey MHC class I affinities for peptides of length 8-11.	http://www.cbs.dtu.dk/services/NetMHC	http://www.cbs.dtu.dk/services/NetMHC.	NA	1	2017:2:7:12:17:31	200	OK
18467177	2008	Comput Biol Chem	1.014	8	North Am	NA	10.1016/j.compbiolchem.2008.03.010	32(4):298-301	A method for discovering transmembrane beta-barrel proteins in Gram-negative bacterial proteomes.	http://yanbioinformatics.cs.usu.edu:8080/TMBKNNsubmit	http://yanbioinformatics.cs.usu.edu::8080/TMBKNNsubmit.	NA	0	2017:2:7:12:17:31	500	Can't connect to yanbioinformatics.cs.usu.edu:8080
18467424	2008	Nucleic Acids Res	9.202	57	Asia	PMC2447750	10.1093/nar/gkn185	36(Web Server issue):W260-4	MultiBind and MAPPIS: webservers for multiple alignment of protein 3D-binding sites and their interactions.	http://bioinfo3d.cs.tau.ac.il/MultiBind	http://bioinfo3d.cs.tau.ac.il/MultiBind), performs	NA	1	2017:2:7:12:17:31	200	OK
18474507	2008	Bioinformatics	5.766	166	Europe	NA	10.1093/bioinformatics/btn221	24(15):1662-8	OCTOPUS: improving topology prediction by two-track ANN-based preference scores and an extended topological grammar.	http://octopus.cbr.su.se	http://octopus.cbr.su.se.	NA	1	2017:2:7:12:17:32	200	OK
18474525	2008	Nucleic Acids Res	9.202	18	North Am	PMC2447807	10.1093/nar/gkn297	36(Web Server issue):W114-8	pssRNAMiner: a plant short small RNA regulatory cascade analysis server.	http://bioinfo3.noble.org/pssRNAMiner/	http://bioinfo3.noble.org/pssRNAMiner/.	NA	1	2017:2:7:12:17:32	200	OK
18477405	2008	BMC Struct Biol	1.926	198	Europe	PMC2397409	10.1186/1472-6807-8-25	08:25:00	K2D2: estimation of protein secondary structure from circular dichroism spectra.	http://www.ogic.ca/projects/k2d2/	http://www.ogic.ca/projects/k2d2/. It accept:	NA	1	2017:2:7:12:17:33	200	OK
18477631	2008	Nucleic Acids Res	9.202	6	Europe	PMC2447730	10.1093/nar/gkn265	36(Web Server issue):W315-9	AMIC@: All MIcroarray Clusterings @ once.	http://bioalgo.iit.cnr.it/amica	http://bioalgo.iit.cnr.it/amica.	NA	1	2017:2:7:12:17:33	200	OK
18477634	2008	Nucleic Acids Res	9.202	NA	Asia	PMC2447781	10.1093/nar/gkn259	36(Web Server issue):W246-51	pFlexAna: detecting conformational changes in remotely related proteins.	http://bigbird.comp.nus.edu.sg/pfa2/	http://bigbird.comp.nus.edu.sg/pfa2/.	NA	0	2017:2:7:12:17:33	404	Not Found
18477637	2008	Nucleic Acids Res	9.202	25	Oceania	PMC2447752	10.1093/nar/gkn279	36(Web Server issue):W286-90	The Predikin webserver: improved prediction of protein kinase peptide specificity using structural information.	http://predikin.biosci.uq.edu.au	http://predikin.biosci.uq.edu.au.	NA	1	2017:2:7:12:17:35	200	OK
18480099	2008	Bioinformatics	5.766	3	North Am	NA	10.1093/bioinformatics/btn233	24(13):1534-5	ProBias: a web-server for the identification of user-specified types of compositionally biased segments in protein sequences.	http://lcg.rit.albany.edu/ProBias	http://lcg.rit.albany.edu/ProBias. SUPPLEMEN:	NA	1	2017:2:7:12:17:38	200	OK
18480101	2008	Bioinformatics	5.766	26	Europe	PMC2718666	10.1093/bioinformatics/btn203	24(13):1542-6	An overview of the wcd EST clustering tool.	www.bioinf.wits.ac.za/~scott/wcdsupp.html	www.bioinf.wits.ac.za/~scott/wcdsupp.html.	NA	1	2017:2:7:12:17:39	200	OK
18480121	2008	Nucleic Acids Res	9.202	8	Europe	PMC2447778	10.1093/nar/gkn289	36(Web Server issue):W332-5	MADNet: microarray database network web server.	http://www.bioinfo.hr/madnet	http://www.bioinfo.hr/madnet.	NA	0	2017:2:7:12:17:41	500	read timeout
18480122	2008	Nucleic Acids Res	9.202	24	Asia	PMC2447810	10.1093/nar/gkn280	36(Web Server issue):W97-103	AsiDesigner: exon-based siRNA design server considering alternative splicing.	http://sysbio.kribb.re.kr/AsiDesigner/	http://sysbio.kribb.re.kr/AsiDesigner/.	NA	0	2017:2:7:12:18:2	500	Can't connect to sysbio.kribb.re.kr:80
18480123	2008	Nucleic Acids Res	9.202	6	Europe	PMC2447766	10.1093/nar/gkn256	36(Web Server issue):W368-71	SerbGO: searching for the best GO tool.	http://www.geneontology.org/GO.tools.microarray.shtml#serbgo	http://www.geneontology.org/GO.tools.microarray.shtml#serbgo).	NA	0	2017:2:7:12:18:3	404	Not Found
18483080	2008	Nucleic Acids Res	9.202	35	Europe	PMC2447777	10.1093/nar/gkn278	36(Web Server issue):W10-3	R-Coffee: a web server for accurately aligning noncoding RNA sequences.	http://www.tcoffee.org	http://www.tcoffee.org.	NA	1	2017:2:7:12:18:4	200	OK
18483082	2008	Nucleic Acids Res	9.202	30	North Am	PMC2447806	10.1093/nar/gkn255	36(Web Server issue):W202-9	PROTEUS2: a web server for comprehensive protein structure prediction and structure-based annotation.	http://wishart.biology.ualberta.ca/proteus2	http://wishart.biology.ualberta.ca/proteus2.	NA	1	2017:2:7:12:18:4	200	OK
18487242	2008	Bioinformatics	5.766	29	Europe	PMC2718673	10.1093/bioinformatics/btn234	24(13):1536-7	Swelfe: a detector of internal repeats in sequences and structures.	http://bioserv.rpbs.jussieu.fr/swelfe	http://bioserv.rpbs.jussieu.fr/swelfe. SUPPLEMEN:	NA	0	2017:2:7:12:18:4	502	Bad Gateway
18487273	2008	Nucleic Acids Res	9.202	122	North Am	PMC2447794	10.1093/nar/gkn296	36(Web Server issue):W399-405	PolySearch: a web-based text mining system for extracting relationships between human diseases, genes, mutations, drugs and metabolites.	http://wishart.biology.ualberta.ca/polysearch	http://wishart.biology.ualberta.ca/polysearch.	NA	1	2017:2:7:12:18:5	200	OK
18487274	2008	Nucleic Acids Res	9.202	207	Asia	PMC2447804	10.1093/nar/gkn294	36(Web Server issue):W170-5	QUMA: quantification tool for methylation analysis.	http://quma.cdb.riken.jp/	http://quma.cdb.riken.jp/.	NA	1	2017:2:7:12:18:5	200	OK
18487623	2008	Nucleic Acids Res	9.202	71	North Am	PMC2447744	10.1093/nar/gkn300	36(Web Server issue):W133-9	DiRE: identifying distant regulatory elements of co-expressed genes.	http://dire.dcode.org	http://dire.dcode.org.	NA	1	2017:2:7:12:18:7	200	OK
18487625	2008	Nucleic Acids Res	9.202	10	Europe	PMC2447722	10.1093/nar/gkn277	36(Web Server issue):W470-4	Signature, a web server for taxonomic characterization of sequence samples using signature genes.	http://www.cmbi.ru.nl/signature	Cotton Microsatellite Database	NA	1	2017:2:7:12:18:7	200	OK
18490376	2008	Nucleic Acids Res	9.202	34	North Am	PMC2447759	10.1093/nar/gkn250	36(Web Server issue):W104-8	OligoWalk: an online siRNA design tool utilizing hybridization thermodynamics.	http://rna.urmc.rochester.edu/servers/oligowalk	http://rna.urmc.rochester.edu/servers/oligowalk.	NA	1	2017:2:7:12:18:8	200	OK
18491122	2008	Int J Legal Med	2.862	31	Europe	NA	10.1007/s00414-008-0233-7	122(5):435-40	The SNPforID browser: an online tool for query and display of frequency data from the SNPforID project.	http://www.snpforid.org/	http://www.snpforid.org/ ). From t:	NA	1	2017:2:7:12:18:8	200	OK
18492720	2008	Nucleic Acids Res	9.202	21	Europe	PMC2447795	10.1093/nar/gkn285	36(Web Server issue):W47-54	Superimpose: a 3D structural superposition server.	http://bioinformatics.charite.de/superimpose	http://bioinformatics.charite.de/superimpose.	NA	1	2017:2:7:12:18:9	200	OK
18495751	2008	Nucleic Acids Res	9.202	173	Europe	PMC2447775	10.1093/nar/gkn304	36(Web Server issue):W119-27	RSAT: regulatory sequence analysis tools.	http://rsat.ulb.ac.be/rsat/	http://rsat.ulb.ac.be/rsat/) is a soft:	NA	1	2017:2:7:12:18:10	200	OK
18496882	2008	J Mol Recognit	2.091	161	North Am	PMC2683948	10.1002/jmr.893	21(4):243-55	Predicting linear B-cell epitopes using string kernels.	http://ailab.cs.iastate.edu/bcpreds/	http://ailab.cs.iastate.edu/bcpreds/.	NA	0	2017:2:7:12:18:10	500	Can't connect to ailab.cs.iastate.edu:80
18499712	2008	Nucleic Acids Res	9.202	55	Europe	PMC2447784	10.1093/nar/gkn307	36(Web Server issue):W55-9	SuperPred: drug classification and target prediction.	http://bioinformatics.charite.de/superpred	http://bioinformatics.charite.de/superpred. SuperPred:	NA	1	2017:2:7:12:18:10	200	OK
18502776	2008	Nucleic Acids Res	9.202	16	Europe	PMC2447749	10.1093/nar/gkn326	36(Web Server issue):W239-45	Domain Hierarchy and closed Loops (DHcL): a server for exploring hierarchy of protein domain structure.	http://sitron.bccs.uib.no/dhcl/	http://sitron.bccs.uib.no/dhcl/) is a web	NA	0	2017:2:7:12:18:10	500	Can't connect to sitron.bccs.uib.no:80
18503087	2008	Nucleic Acids Res	9.202	68	North Am	PMC2447800	10.1093/nar/gkn322	36(Web Server issue):W30-4	PROMALS3D web server for accurate multiple protein sequence and structure alignments.	http://prodata.swmed.edu/promals3d/	http://prodata.swmed.edu/promals3d/.	NA	1	2017:2:7:12:18:11	200	OK
18503088	2008	Nucleic Acids Res	9.202	5	Europe	PMC2447745	10.1093/nar/gkn320	36(Web Server issue):W25-9	SCANPS: a web server for iterative protein sequence database searching by dynamic programing, with display in a hierarchical SCOP browser.	http://www.compbio.dundee.ac.uk/www-scanps	http://www.compbio.dundee.ac.uk/www-scanps. The serve:	NA	1	2017:2:7:12:18:11	200	OK
18506593	2008	Mol Divers	2.08	44	Asia	NA	10.1007/s11030-008-9073-0	12(1):41-5	Using AdaBoost for the prediction of subcellular location of prokaryotic and eukaryotic proteins.	http://chemdata.shu.edu.cn/subcell/	http://chemdata.shu.edu.cn/subcell/ .	NA	0	2017:2:7:12:18:11	404	Not Found
18508808	2008	Nucleic Acids Res	9.202	82	North Am	PMC2447802	10.1093/nar/gkn314	36(Web Server issue):W270-5	PBEQ-Solver for online visualization of electrostatic potential of biomolecules.	http://www.charmm-gui.org/input/pbeqsolver	http://www.charmm-gui.org/input/pbeqsolver.	NA	1	2017:2:7:12:18:13	200	OK
18511460	2008	Nucleic Acids Res	9.202	14	North Am	PMC2447741	10.1093/nar/gkn330	36(Web Server issue):W176-80	GeConT 2: gene context analysis for orthologous proteins, conserved domains and metabolic pathways.	http://bioinfo.ibt.unam.mx/gecont	http://bioinfo.ibt.unam.mx/gecont.	NA	1	2017:2:7:12:18:13	200	OK
18515346	2008	Nucleic Acids Res	9.202	12	Europe	PMC2447803	10.1093/nar/gkn335	36(Web Server issue):W523-8	bioNMF: a web-based tool for nonnegative matrix factorization in biology.	http://bionmf.dacya.ucm.es	http://bionmf.dacya.ucm.es.	NA	0	2017:2:7:12:18:15	500	read timeout
[truncated: 2,320 more rows]
