# Supplementary material for: A snapshot of 3649 Web-based services published between 1994 and 2017 shows a decrease in availability after 2 years
Source: Oxford University Press journal article supplement (doi:10.1093/bib/bbx159), 2017-11-02
Supplement: bbx159_supp_table2.xlsx [file bbx159_supp_table2.xlsx]

## Sheet: top100 inactive
Supplemental Table 2
Title:
A snapshot of 3,649 web-based services published between 1994 and 2017 shows a decrease in availability after two years
Authors:
Ágnes Ősz, Lőrinc Sándor Pongor, Danuta Szirmai, Balázs Győrffy
Description:
Re-evaluation of top 100 most cited inactive URLs
PMID	Overall cited by	Year	Impact factor (2015)	Main group	Subgroup	Title
10869041	1888	2000	5.766	Proteome	Protein structure analysis	The PSIPRED protein structure prediction server.
15980461	1320	2005	9.202	Proteome	Protein comparison analysis	The HHpred interactive server for protein homology detection and structure prediction.
10860755	1292	2000	4.517	Genome	Genome annotation	Enhanced genome annotation using structural profiles in the program 3D-PSSM.
18803844	1258	2008	2.435	Other	Metagenome	The metagenomics RAST server - a public resource for the automatic phylogenetic and functional analysis of metagenomes.
15215473	1189	2004	9.202	Proteome	Protein structure analysis	DICHROWEB, an online server for protein secondary structure analyses from circular dichroism spectroscopic data.
15073015	1172	2004	5.766	Genome	Phylogenomics	Bellerophon: a program to detect chimeric sequences in multiple sequence alignments.
11125082	1083	2001	9.202	Transcriptome	Gene regulation	The RDP-II (Ribosomal Database Project).
9927721	848	1998	5.766	Proteome	Protein structure analysis	JPred: a consensus secondary structure prediction server.
9927713	814	1998	5.766	Genome	Phylogenomics	Hidden Markov models for detecting remote protein homologies.
16893466	742	2006	2.435	Genome	Phylogenomics	UniFrac--an online tool for comparing microbial community diversity in a phylogenetic context.
11743721	738	2001	4.517	Genome	Phylogenomics	Automatic clustering of orthologs and in-paralogs from pairwise species comparisons.
11524373	635	2001	5.766	Network	Biological network analysis	Support vector machine approach for protein subcellular localization prediction.
12761065	605	2003	5.766	Proteome	Protein structure analysis	3D-Jury: a simple approach to improve protein structure predictions.
16845035	604	2006	9.202	Genome	Sequence alignment	NAST: a multiple sequence alignment server for comparative analysis of 16S rRNA genes.
15980489	569	2005	9.202	Proteome	Protein structure analysis	Protein structure prediction servers at University College London.
10861942	532	2000	2.499	Proteome	Protein comparison analysis	Application of multiple sequence alignment profiles to improve protein secondary structure prediction.
15980571	439	2005	9.202	Proteome	Protein structure analysis	SCRATCH: a protein structure and structural feature prediction server.
15215461	413	2004	9.202	Proteome	Protein structure analysis	ElNemo: a normal mode web server for protein movement analysis and the generation of templates for molecular replacement.
11238068	393	2001	5.766	Transcriptome	Gene expression analysis	A hierarchical unsupervised growing neural network for clustering gene expression patterns.
16845089	378	2006	9.202	Phenotype	GWAS analysis	FASTSNP: an always up-to-date and extendable service for SNP function analysis and prioritization.
17631615	344	2007	9.202	Transcriptome	Gene regulation	CPC: assess the protein-coding potential of transcripts using sequence features and support vector machine.
19406924	319	2009	9.202	Transcriptome	RNA interference	DIANA-microT web server: elucidating microRNA functions through target prediction.
8743995	299	1996	11.351	Other	Collection	BCM Search Launcher--an integrated interface to molecular biology data base search and analysis services available on the World Wide Web.
15215366	263	2004	9.202	Visualization and design	Primer design	Sfold web server for statistical folding and rational design of nucleic acids.
17553836	262	2007	9.202	Transcriptome	RNA interference	MiPred: classification of real and pseudo microRNA precursors using random forest prediction model with combined features.
9694991	253	1998	5.766	Transcriptome	Protein structure analysis	Homology modeling, model and software evaluation: three related resources.
17237066	249	2007	5.766	Network	Biological network analysis	Improving the accuracy of transmembrane protein topology prediction using evolutionary information.
11752343	249	2002	9.202	Transcriptome	Protein structure analysis	InBase: the Intein Database.
12820902	238	2003	2.435	Transcriptome	Gene regulation	AGRIS: Arabidopsis gene regulatory information server, an information resource of Arabidopsis cis-regulatory elements and transcription factors.
19420058	225	2009	9.202	Other	Collection	BioMart Central Portal--unified access to biological data.
19765283	225	2009	2.435	Transcriptome	RNA interference	Accurate microRNA target prediction correlates with protein repression levels.
11604541	224	2001	3.039	Network	Mathematical modeling	Pcons: a neural-network-based consensus predictor that improves fold recognition.
12499296	223	2003	5.766	Text mining	Data mining	Mining gene expression databases for association rules.
15980567	222	2005	9.202	Transcriptome	RNA interference	miRU: an automated plant miRNA target prediction server.
10366664	221	1999	5.766	Genome	Genome variant analysis	REPuter: fast computation of maximal repeats in complete genomes.
16845102	218	2006	9.202	Network	Mathematical modeling	ModelTest Server: a web-based tool for the statistical selection of models of nucleotide substitution online.
20702402	215	2010	5.766	Phenotype	Phenomics	Genevar: a database and Java application for the analysis and visualization of SNP-gene associations in eQTL studies.
21624888	208	2011	9.202	Network	Biological network analysis	SwissDock, a protein-small molecule docking web service based on EADock DSS.
18442991	207	2008	9.202	Network	Biological network analysis	The RosettaDock server for local protein-protein docking.
15608188	207	2005	9.202	Proteome	Protein binding analysis	The CATH Domain Structure Database and related resources Gene3D and DHS provide comprehensive domain family information for genome analysis.
12824354	200	2003	9.202	Genome	Sequence alignment	Tcoffee@igs: A web server for computing, evaluating and combining multiple sequence alignments.
16889410	193	2006	4.173	Network	Biological network analysis	Predicting eukaryotic protein subcellular location by fusing optimized evidence-theoretic K-Nearest Neighbor classifiers.
9682055	191	1998	5.766	Proteome	Protein comparison analysis	Removing near-neighbour redundancy from large protein sequence collections.
12175724	191	2002	2.127	Proteome	Protein binding analysis	Prediction of MHC class I binding peptides using profile motifs.
15072998	184	2004	5.766	Netwotk	Mathematical modeling	Web-based kinetic modelling using JWS Online.
15751111	177	2005	0.831	Proteome	Protein structure analysis	Optimizing long intrinsic disorder predictors with protein evolutionary information.
15215417	172	2004	9.202	Network	Biological network analysis	ConPred II: a consensus prediction method for obtaining transmembrane topology models with high reliability.
12824329	165	2003	9.202	Proteome	Protein structure analysis	MATRAS: A program for protein 3D structure comparison.
14988101	162	2004	5.766	Genome	Phylogenomics	Haplotype reconstruction from genotype data using Imperfect Phylogeny.
18496882	161	2008	2.091	Proteome	Immune system analysis	Predicting linear B-cell epitopes using string kernels.
16477622	161	2006	2.499	Proteome	Protein binding analysis	On the nature of cavities on protein surfaces: application to the identification of drug-binding sites.
15868141	160	2005	2.303	Proteome	Protein binding analysis	Automated generation and evaluation of specific MHC binding predictive tools: ARB matrix applications.
15980566	160	2005	9.202	Transcriptome	RNA interference	MicroInspector: a web tool for detection of miRNA binding sites in an RNA sequence.
10366660	159	1999	5.766	Proteome	Protein annotation	Automated genome sequence analysis and annotation.
15523666	155	2005	2.499	Proteome	Protein comparison analysis	Fold recognition by combining sequence profiles derived from evolution and from depth-dependent structural alignment of fragments.
12824345	154	2003	9.202	Transcriptome	Gene expression analysis	GEPAS: A web-based resource for microarray gene expression data analysis.
12824312	153	2003	9.202	Proteome	Protein comparison analysis	The PredictProtein server.
14736340	151	2004	2.435	Visualization and design	Visualization	HMM Logos for visualization of protein families.
16845018	149	2006	9.202	Proteome	Protein structure analysis	PROFEAT: a web server for computing structural and physicochemical features of proteins and peptides from amino acid sequence.
19001476	147	2009	5.766	Network	Biological network analysis	ProtorP: a protein-protein interaction analysis server.
11751240	147	2001	5.766	Network	Mathematical modeling	EVA: continuous automatic evaluation of protein structure prediction servers.
17207271	143	2007	2.435	Proteome	Immune system analysis	VaxiJen: a server for prediction of protective antigens, tumour antigens and subunit vaccines.
11125083	142	2001	9.202	Transcriptome	RNA structure analysis	The European Large Subunit Ribosomal RNA Database.
15073017	138	2004	5.766	Genome	Sequence alignment	Alignment of RNA base pairing probability matrices.
15146497	138	2004	2.499	Proteome	Protein comparison analysis	Single-body residue-level knowledge-based energy score combined with sequence-profile and secondary structure information for fold recognition.
11125105	137	2001	9.202	Genome	Genome variant analysis	SpliceDB: database of canonical and non-canonical mammalian splice sites.
9730925	136	1998	5.766	Proteome	Protein annotation	Automatic extraction of keywords from scientific text: application to the knowledge domain of protein families.
11858840	135	2002	9.858	Genome	Phylogenomics	SHOT: a web server for the construction of genome phylogenies.
15720719	135	2005	2.435	Proteome	Protein binding analysis	PSSM-based prediction of DNA binding sites in proteins.
16002049	134	2005		Proteome	Protein comparison analysis	Using optimized evidence-theoretic K-nearest neighbor classifier and pseudo-amino acid composition to predict membrane protein types.
20525782	133	2010	9.202	Proteome	Protein structure analysis	SMOG@ctbp: simplified deployment of structure-based models in GROMACS.
21059685	133	2011	9.202	Transcriptome	Gene regulation	AGRIS: the Arabidopsis Gene Regulatory Information Server, an update.
17112313	131	2006	4.587	Network	Biological network analysis	3D complex: a structural classification of protein complexes.
10383475	128	1999	5.766	Other	Data management	An ontology for bioinformatics applications.
12028595	128	2002	2.435	Genome	Phylogenomics	RIO: analyzing proteomes by automated phylogenomics using resampled inference of orthologs.
15215345	126	2004	9.202	Genome	Sequence alignment	3DCoffee@igs: a web server for combining sequences and structures into a multiple sequence alignment.
15980511	125	2005	9.202	Genome	Genome annotation	BASys: a web server for automated bacterial genome annotation.
15980436	123	2005	9.202	Network	Biological network analysis	LOCSVMPSI: a web server for subcellular localization of eukaryotic proteins using SVM and profile of PSI-BLAST.
15981269	122	2005	2.499	Proteome	Protein binding analysis	Geometry-based flexible and symmetric protein docking.
10592179	120	2000	9.202	Visualization and design	Visualization	ProtoMap: automatic classification of protein sequences and hierarchy of protein families.
17235453	119	2007	3.196	Network	Biological network analysis	Euk-PLoc: an ensemble classifier for large-scale eukaryotic protein subcellular location prediction.
10360978	118	1999		Network	Biological network analysis	A novel method for predicting transmembrane segments in proteins based on a statistical analysis of the SwissProt database: the PRED-TMR algorithm.
15162489	118	2004	2.499	Proteome	Protein binding analysis	A physical reference state unifies the structure-derived potential of mean force for protein folding and binding.
14997569	116	2004	2.499	Proteome	Protein structure analysis	A novel method for protein secondary structure prediction using dual-layer SVM and profiles.
16845059	112	2006	9.202	Transcriptome	Gene expression analysis	Arabidopsis Co-expression Tool (ACT): web server tools for microarray-based gene expression analysis.
19474339	112	2009	9.202	Visualization and design	Visualization	Web 3DNA--a web server for the analysis, reconstruction, and visualization of three-dimensional nucleic-acid structures.
15743531	111	2005	2.435	Other	Metagenome	PHACCS, an online tool for estimating the structure and diversity of uncultured viral communities using metagenomic information.
16806277	109	2006	2.049	Proteome	Protein comparison analysis	Using stacked generalization to predict membrane protein types based on pseudo-amino acid composition.
19435882	109	2009	9.202	Transcriptome	RNA structure analysis	CENTROIDFOLD: a web server for RNA secondary structure prediction.
12386112	108	2002		Text mining	Dictionary	Creating an online dictionary of abbreviations from MEDLINE.
10592230	107	2000	9.202	Proteome	Immune system analysis	IMGT, the international ImMunoGeneTics database.
11353083	107	2001	9.202	Transcriptome	RNA structure analysis	Discovering common stem-loop motifs in unaligned RNA sequences.
12824423	106	2003	9.202	Genome	Phylogenomics	ORFeus: Detection of distant homology using sequence profiles and predicted secondary structure.
15262782	106	2004	5.766	Proteome	Protein structure analysis	A neural-network-based method for predicting protein stability changes upon single point mutations.
16845101	105	2006	9.202	Network	Biological network analysis	FOLD-RATE: prediction of protein folding rates from amino acid sequence.
11266621	101	2001	3.039	Network	Mathematical modeling	LiveBench-1: continuous benchmarking of protein structure prediction servers.
19692556	101	2009	5.766	Transcriptome	RNA interference	TargetMiner: microRNA target prediction with systematic identification of tissue-specific negative examples.
9342339	99	1997		Proteome	Protein structure analysis	Assigning folds to the proteins encoded by the genome of Mycoplasma genitalium.
12824421	98	2003	9.202	Genome	Sequence alignment	WU-Blast2 server at the European Bioinformatics Institute.
11120681	98	2000	5.766	Proteome	Protein structure analysis	CAST: an iterative algorithm for the complexity analysis of sequence tracts. Complexity analysis of sequence tracts.
